# Supplementary material
Source: ML conference proceedings conference paper supplement (https://openreview.net/forum?id=BhzEFwLj5l5)

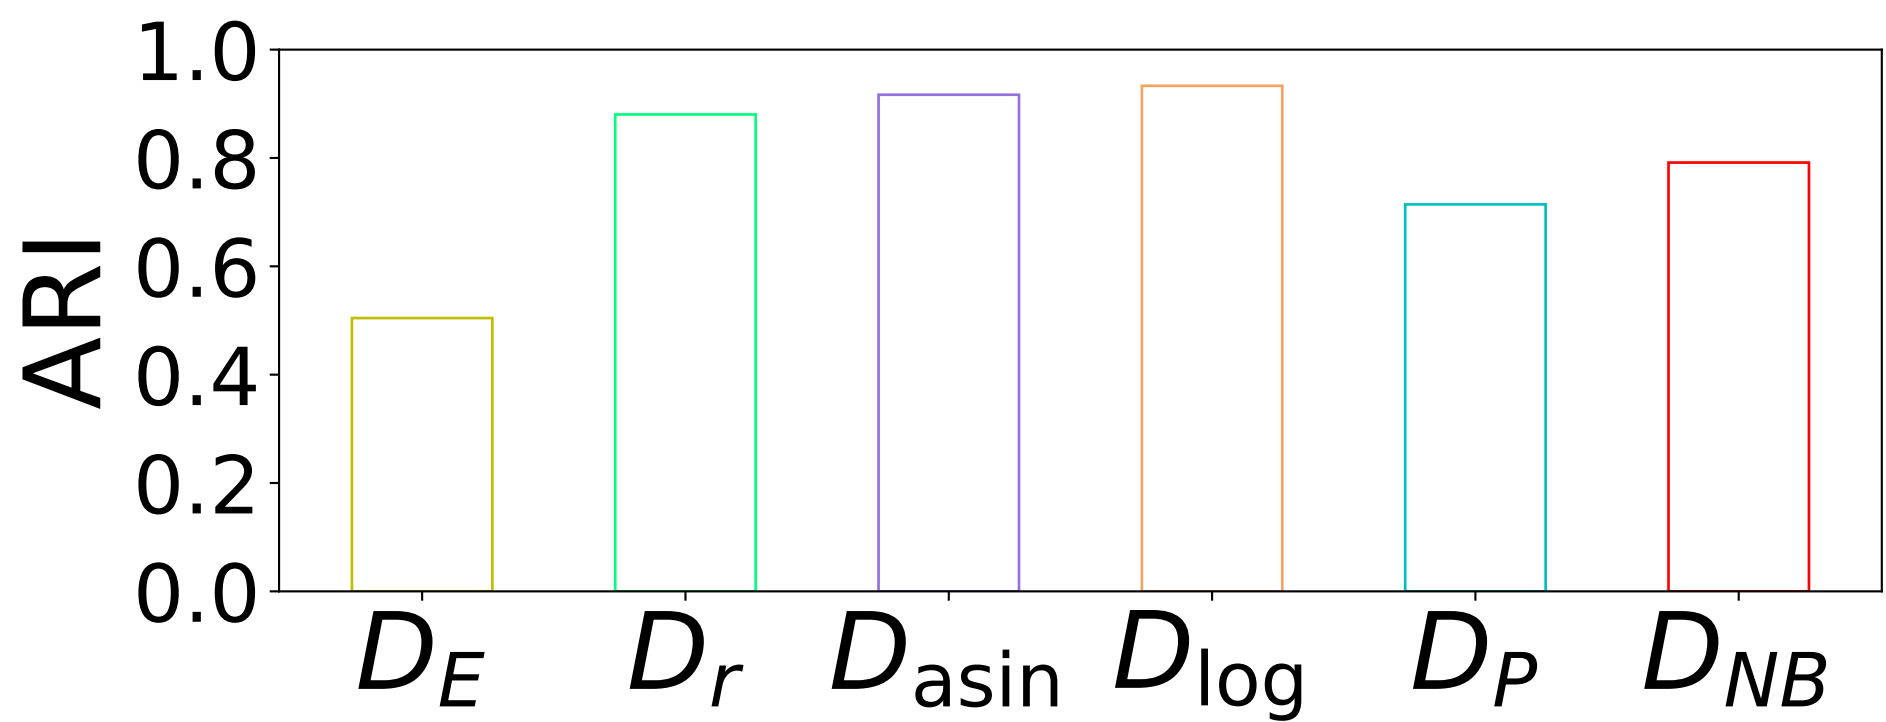

Supplement: supplementary_material [file attachment]

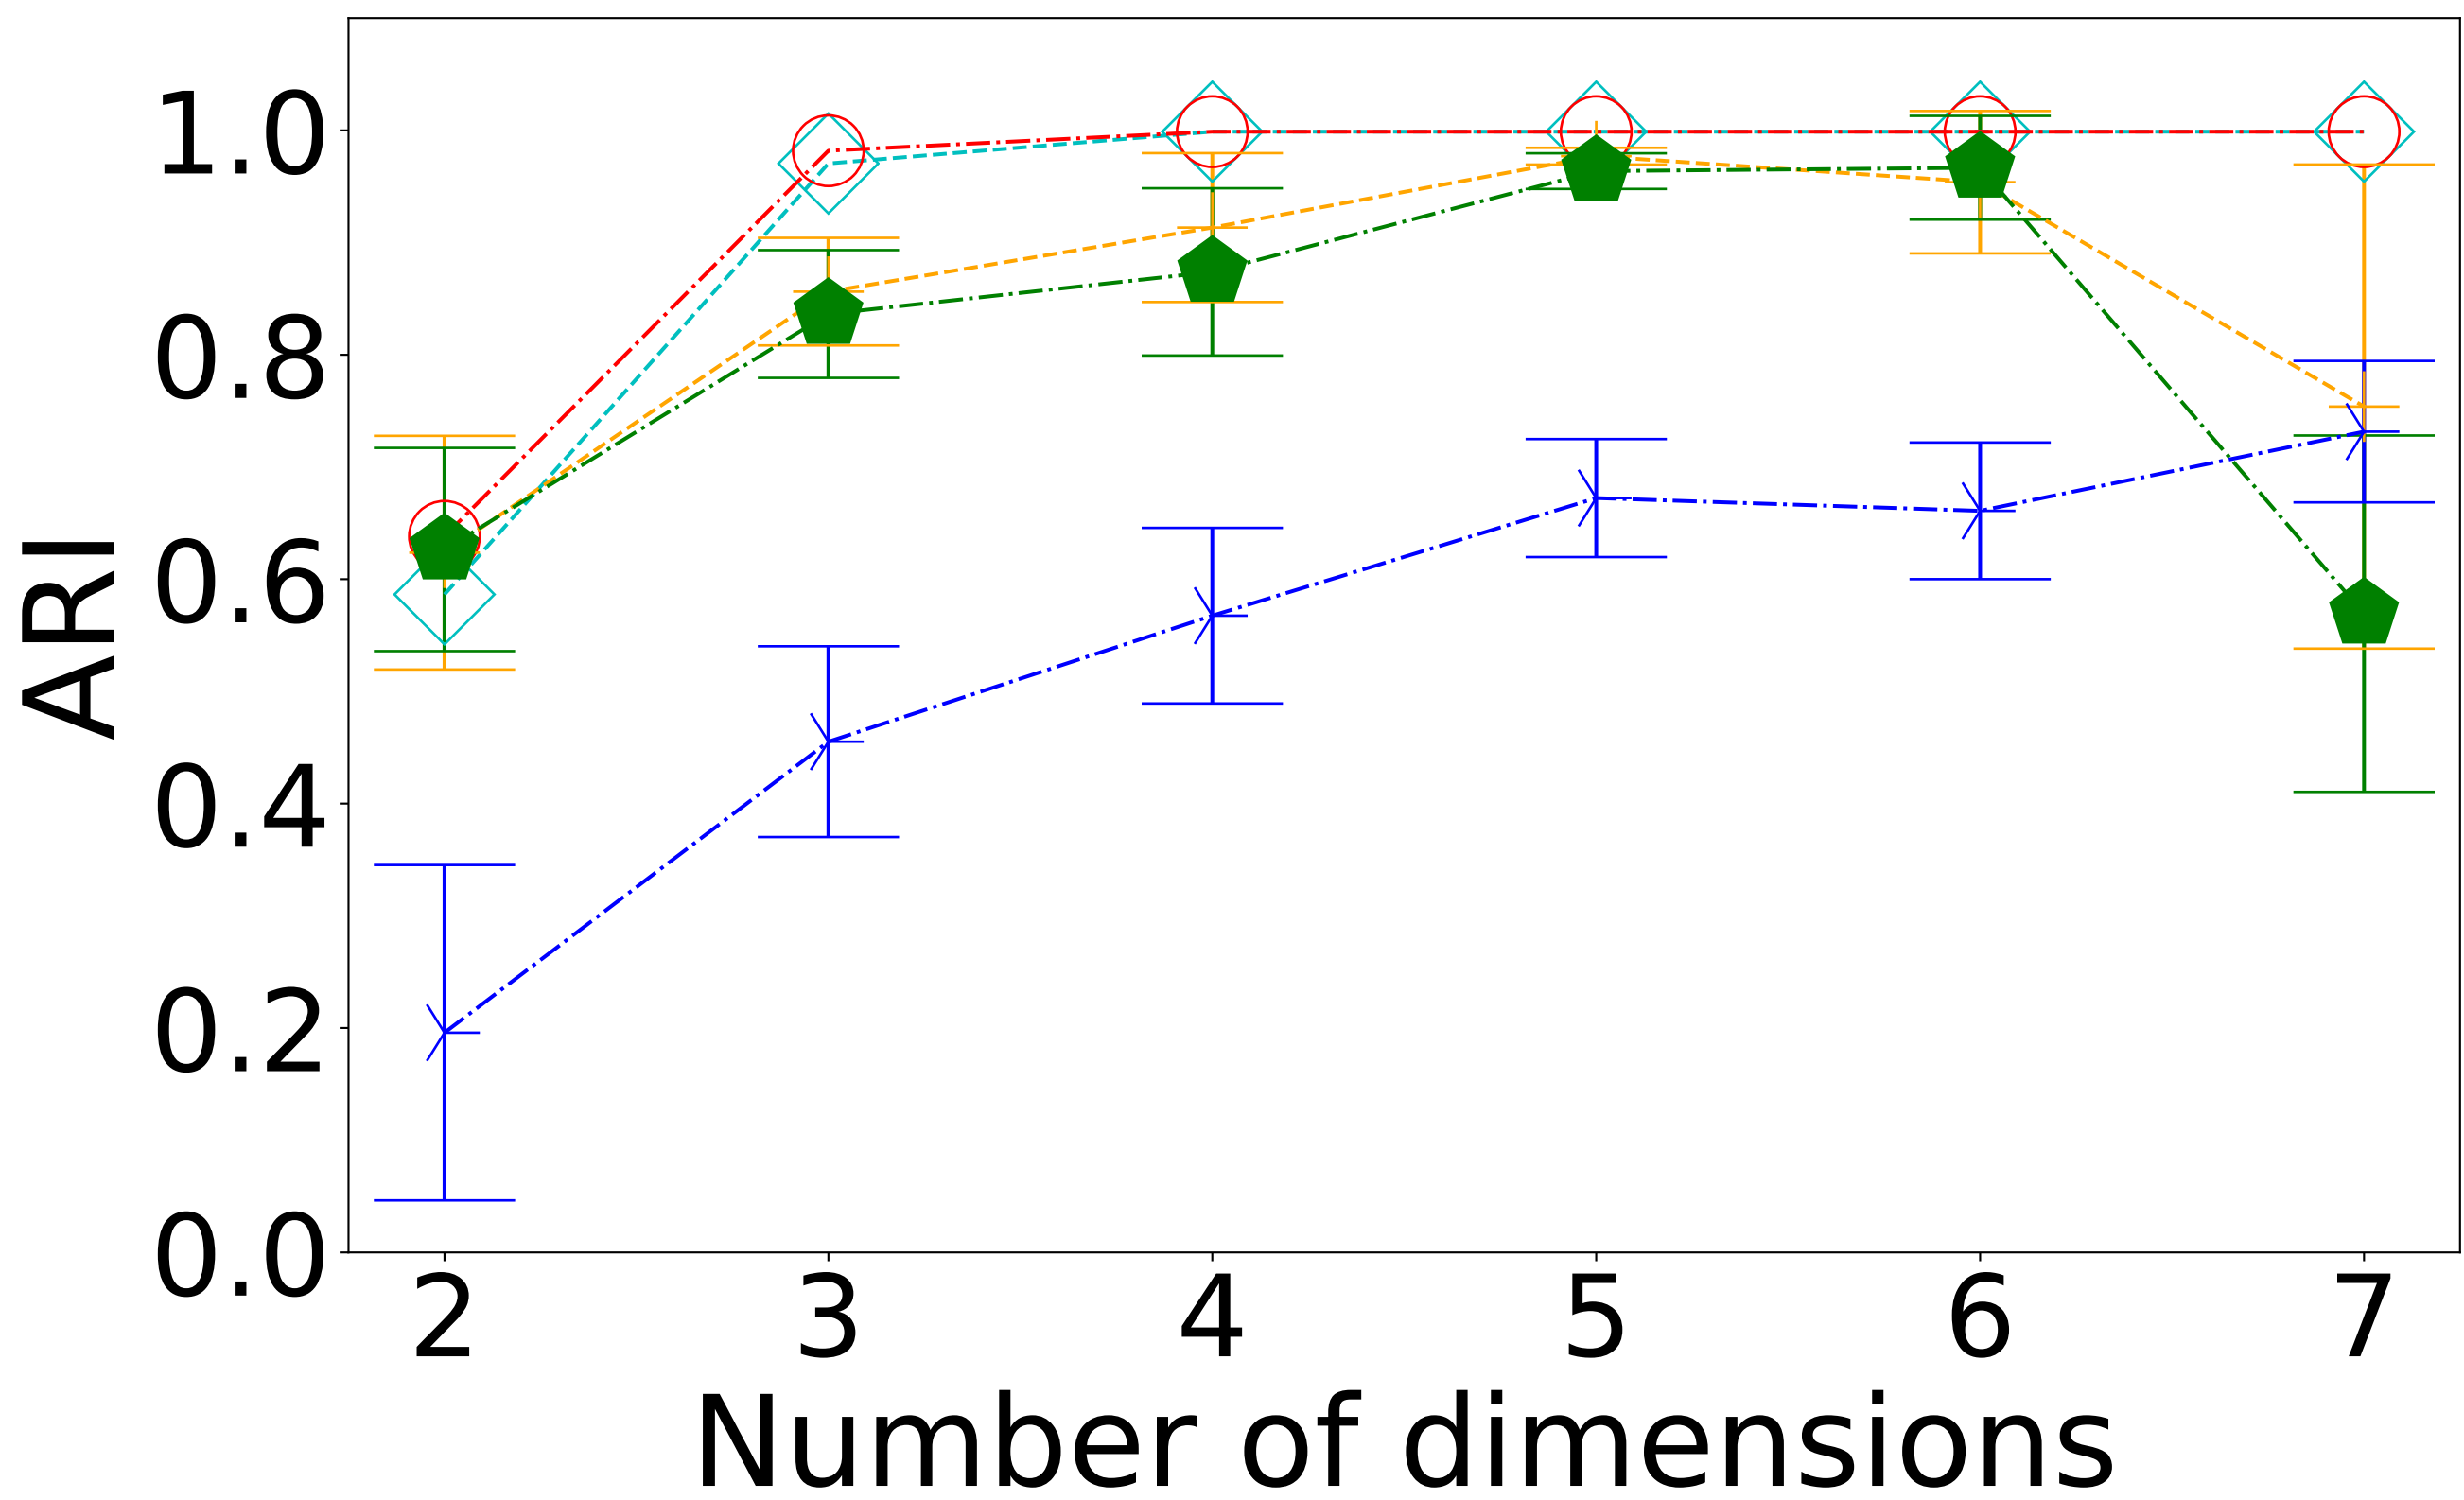

Supplement: supplementary_material [file attachment]

$D_E$ 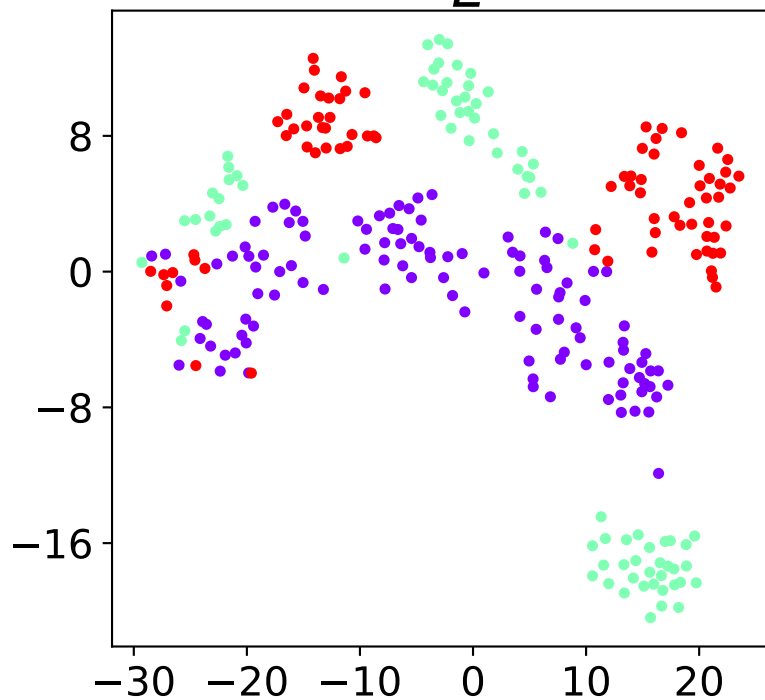 $D_r$ 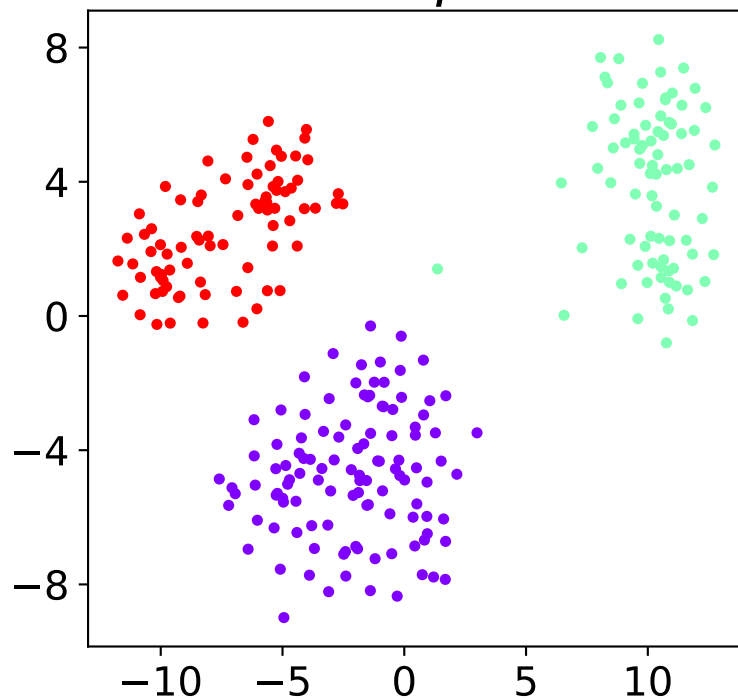 $D_{\text{asin}}$ 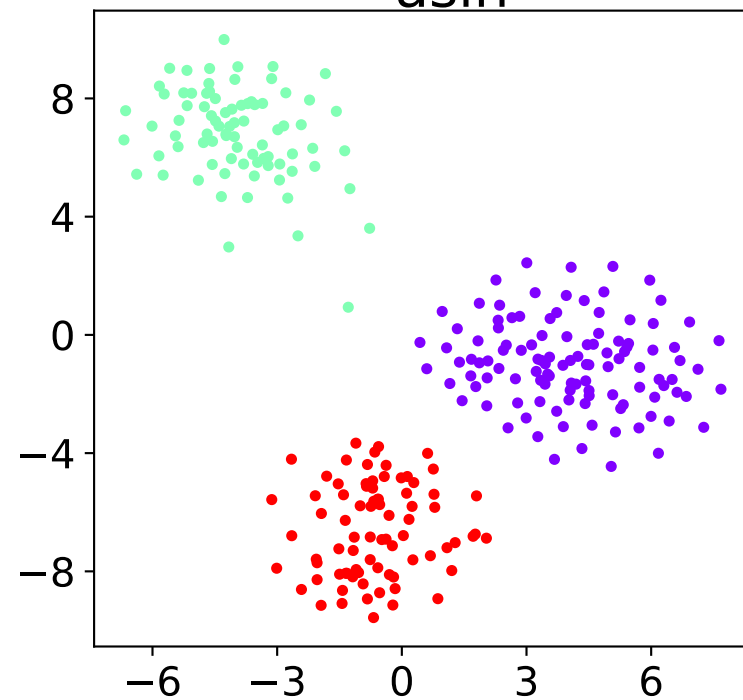 $D_{\text{log}}$ 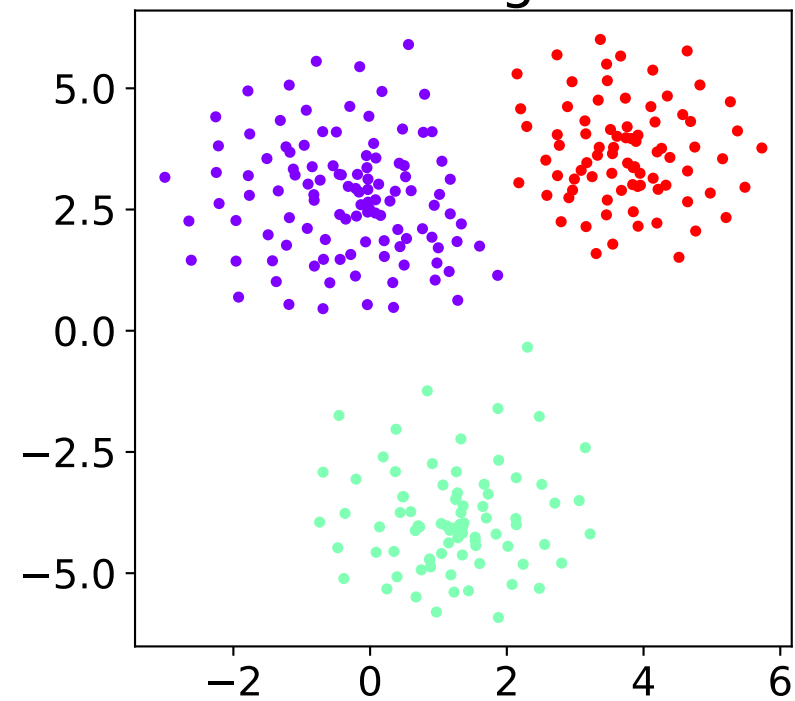 $D_P$ 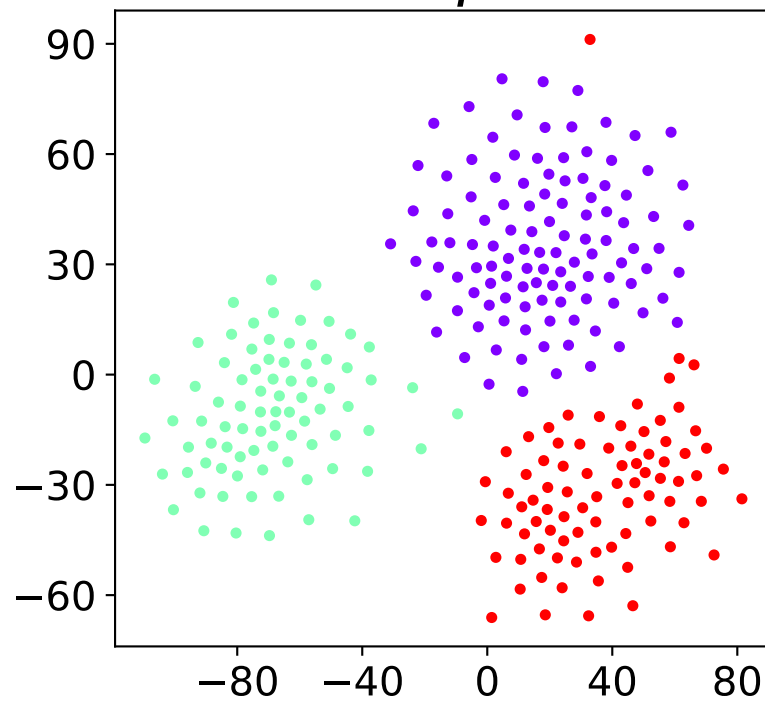 $D_{NB}$ 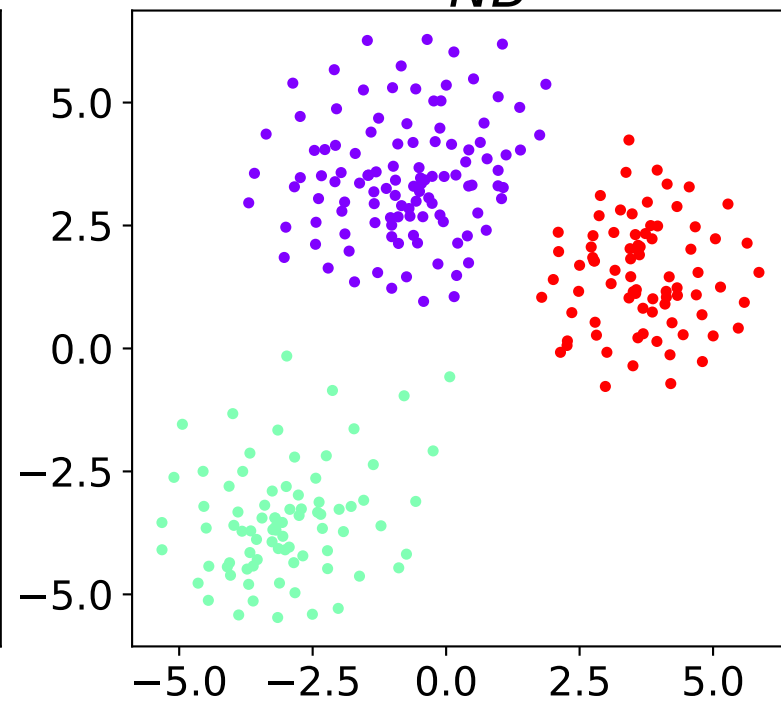

Supplement: supplementary_material [file attachment]

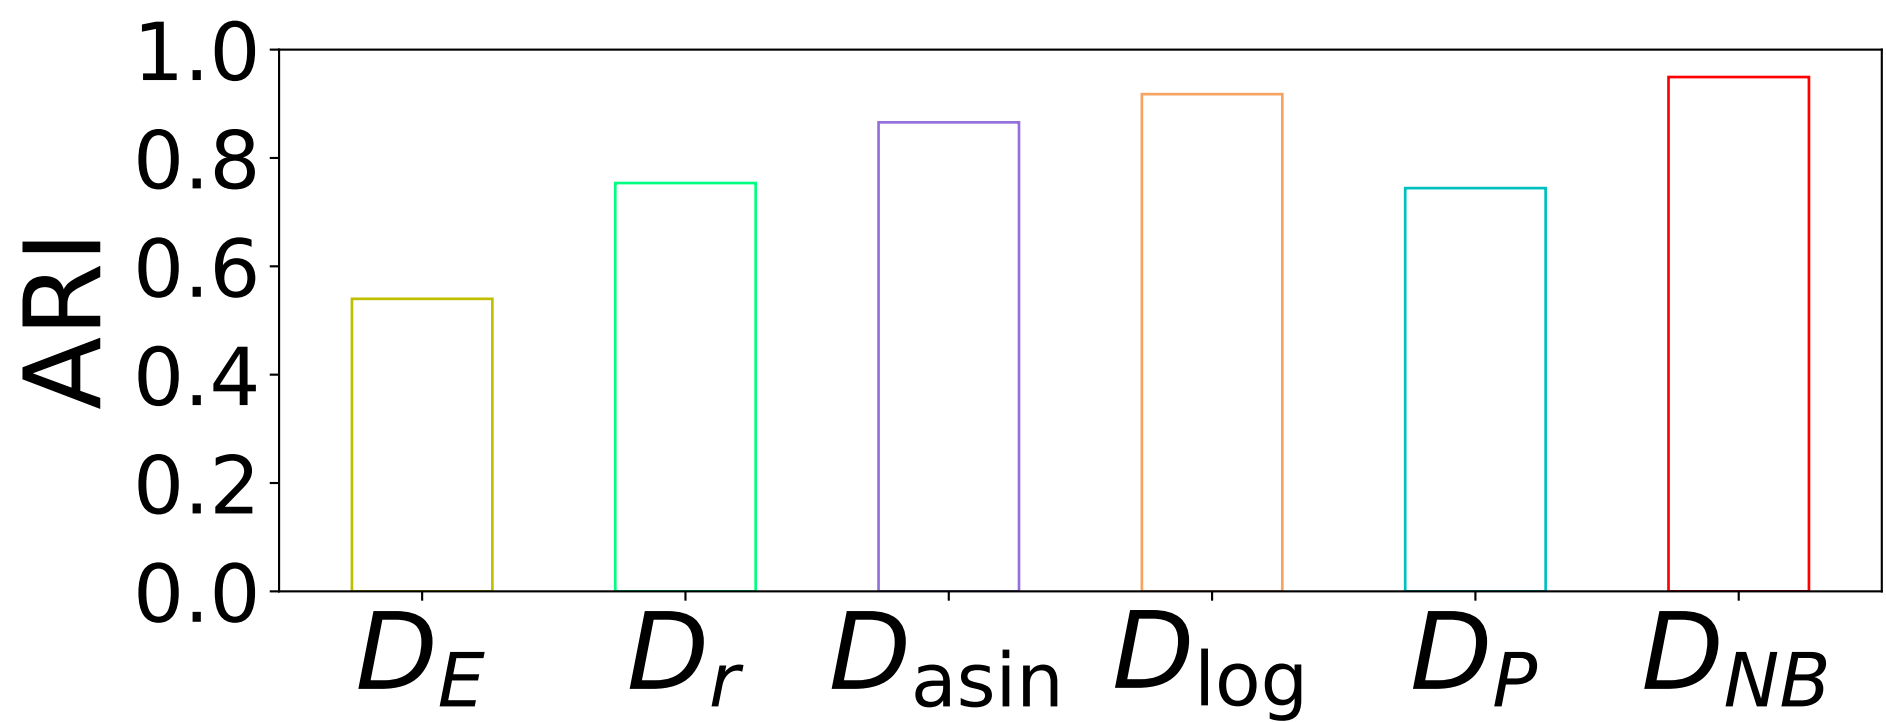

Supplement: supplementary_material [file attachment]

GPCA-P

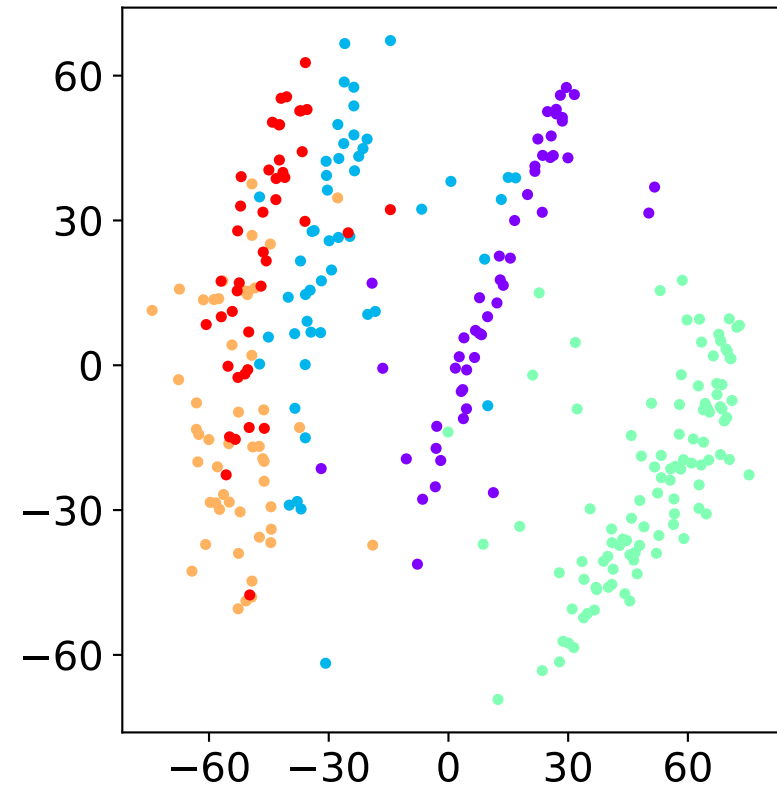

GPCA-NB

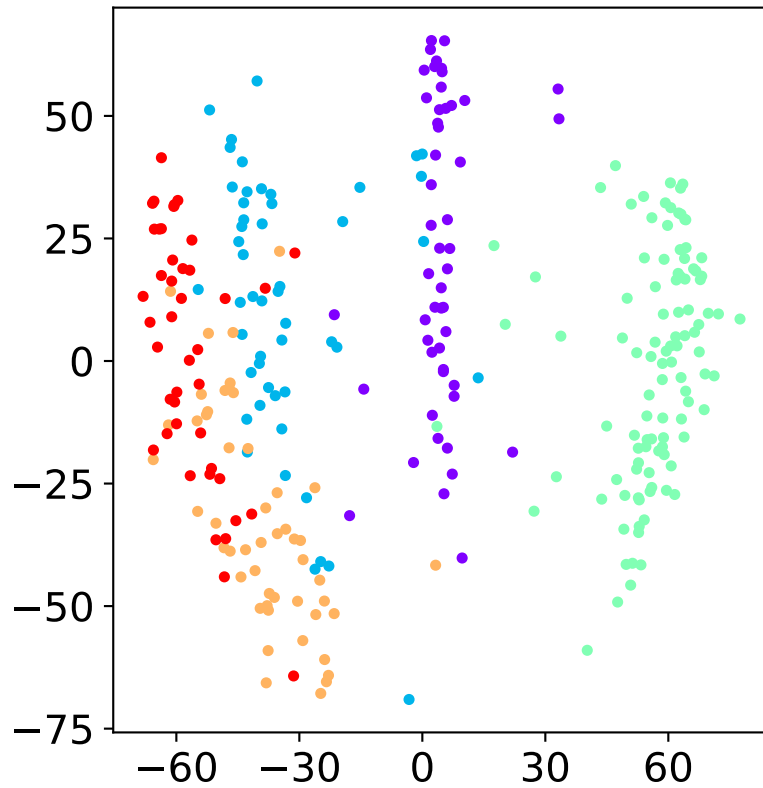

NMF

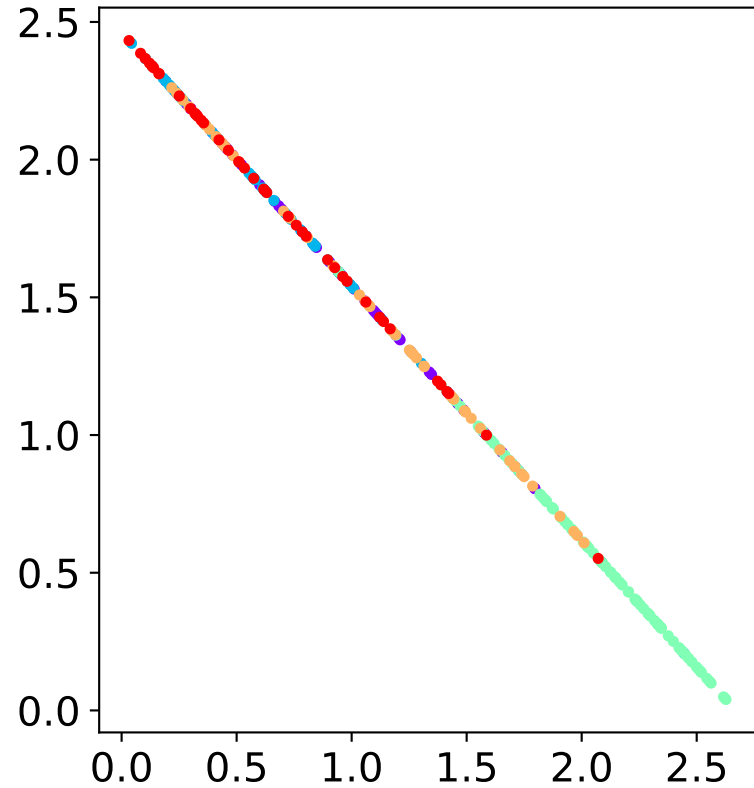

Supplement: supplementary_material [file attachment]

$D_E$ 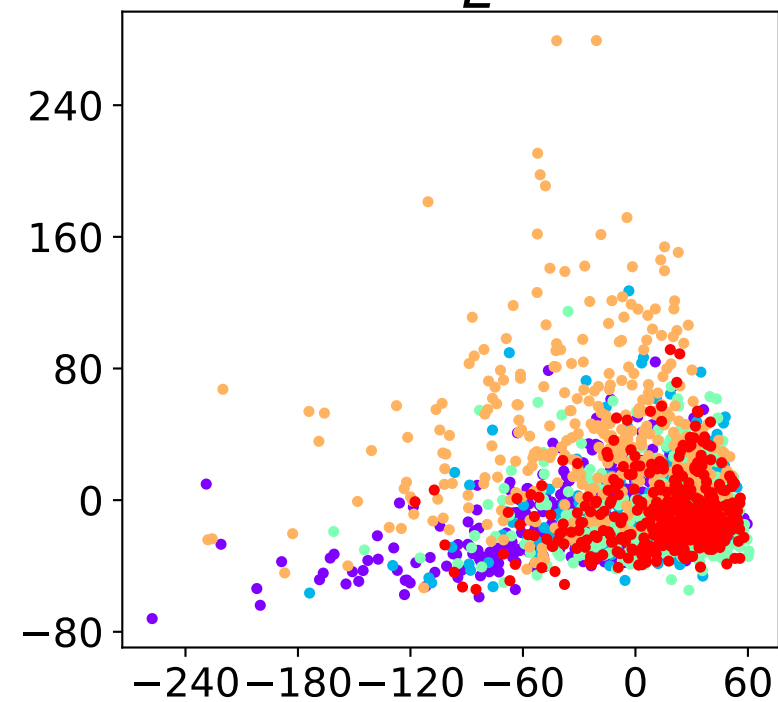 $D_r$ 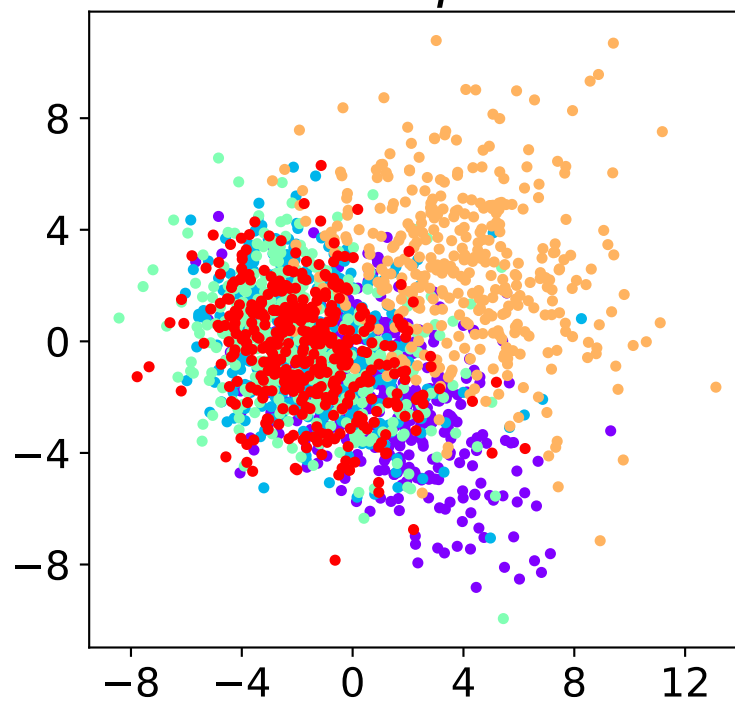 $D_{\text{asin}}$ 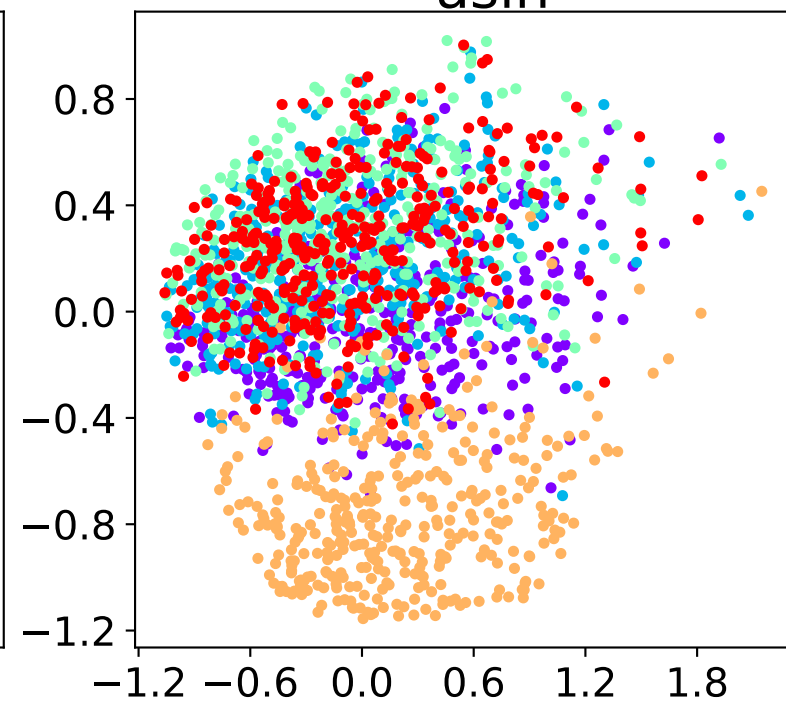 $D_{\text{log}}$ 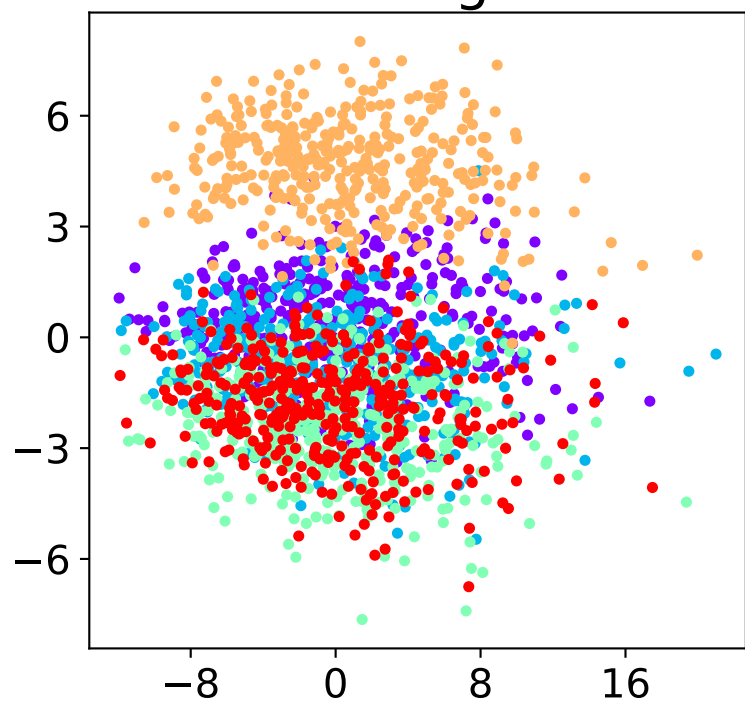 $D_P$ 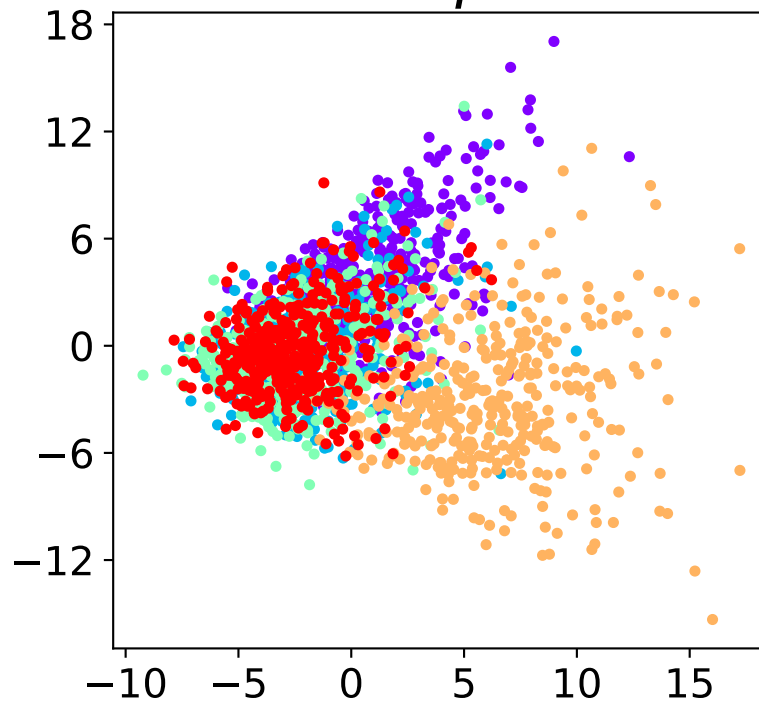 $D_{NB}$ 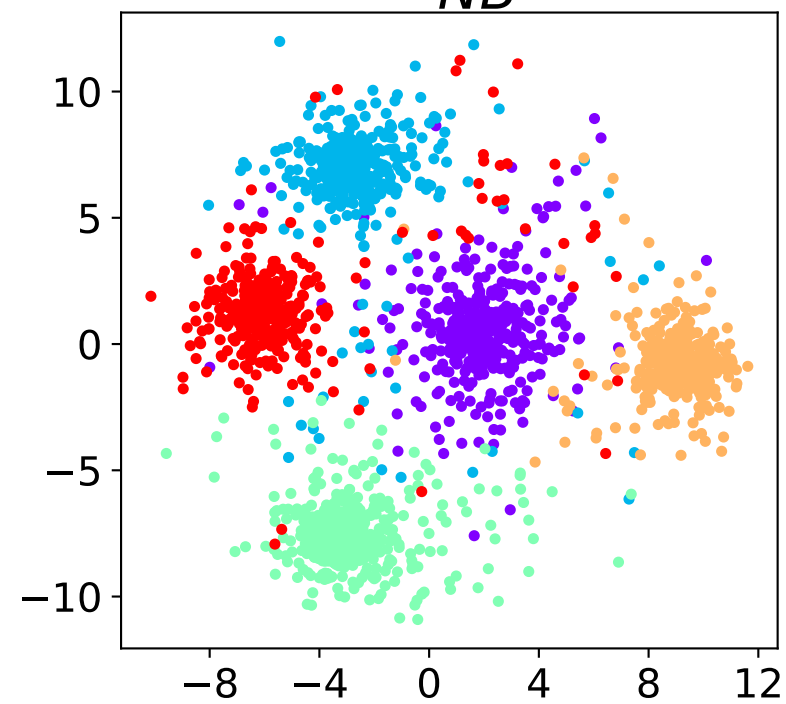

Supplement: supplementary_material [file attachment]

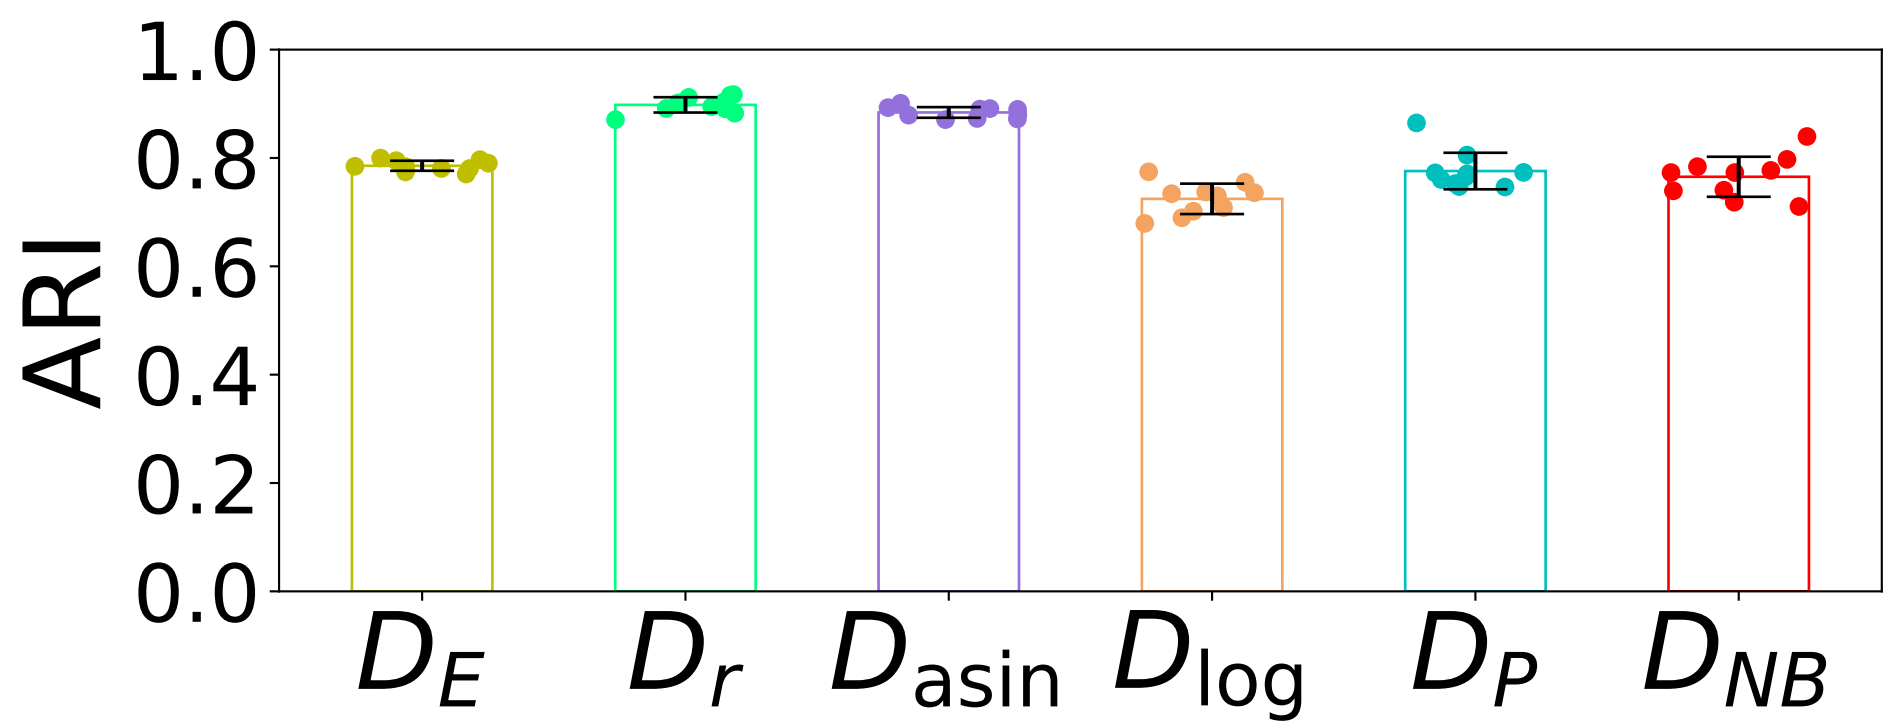

Supplement: supplementary_material [file attachment]

$D_E$ 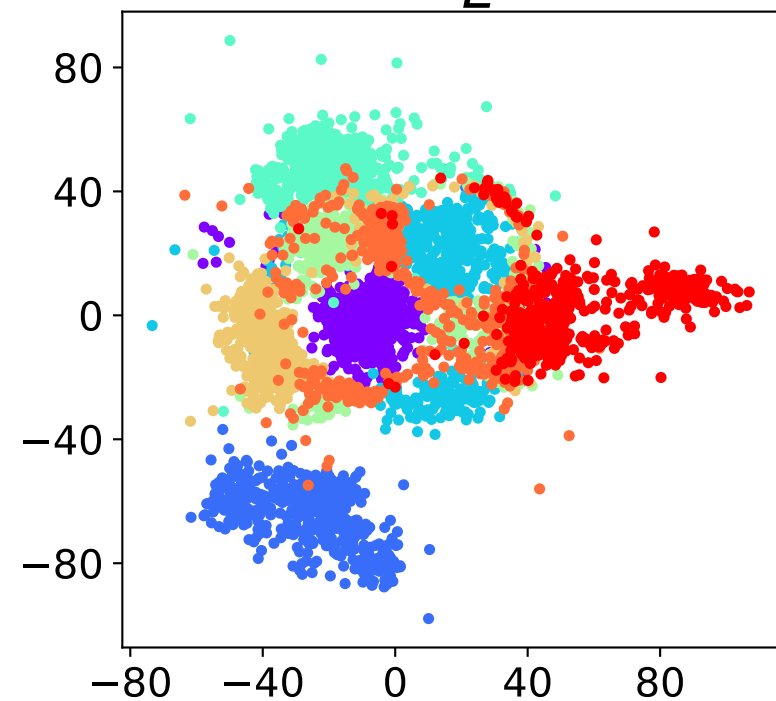 $D_r$ 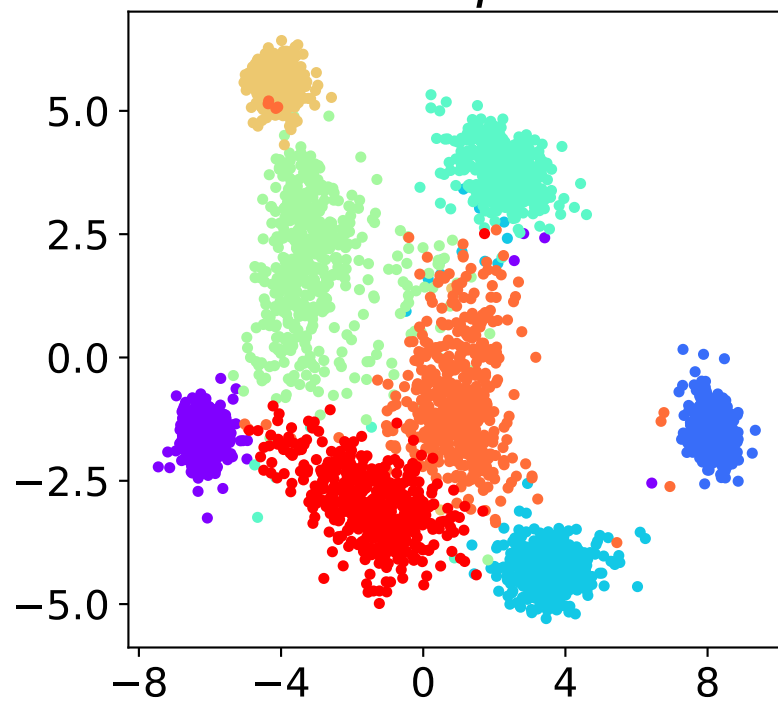 $D_{\text{asin}}$ 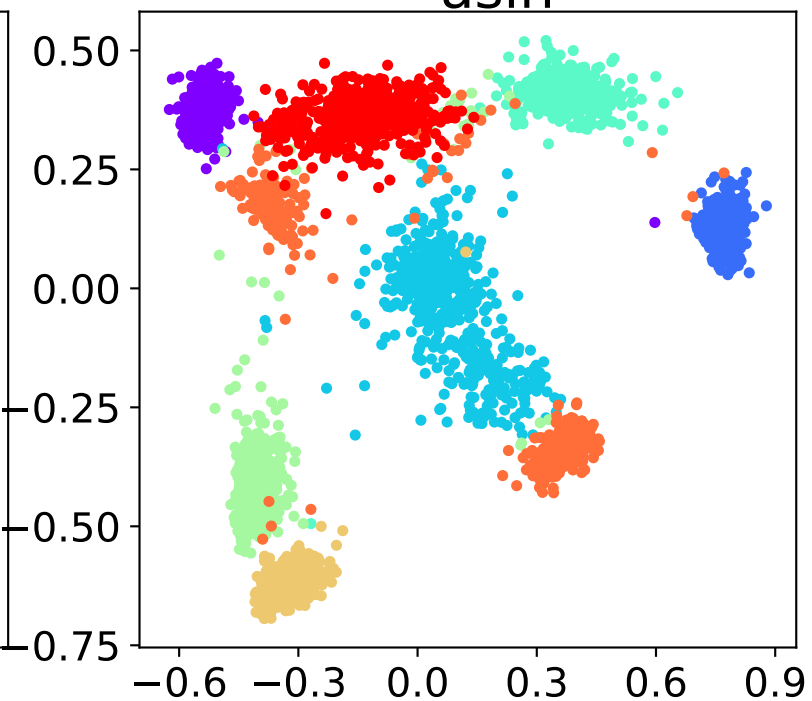 $D_{\text{log}}$ 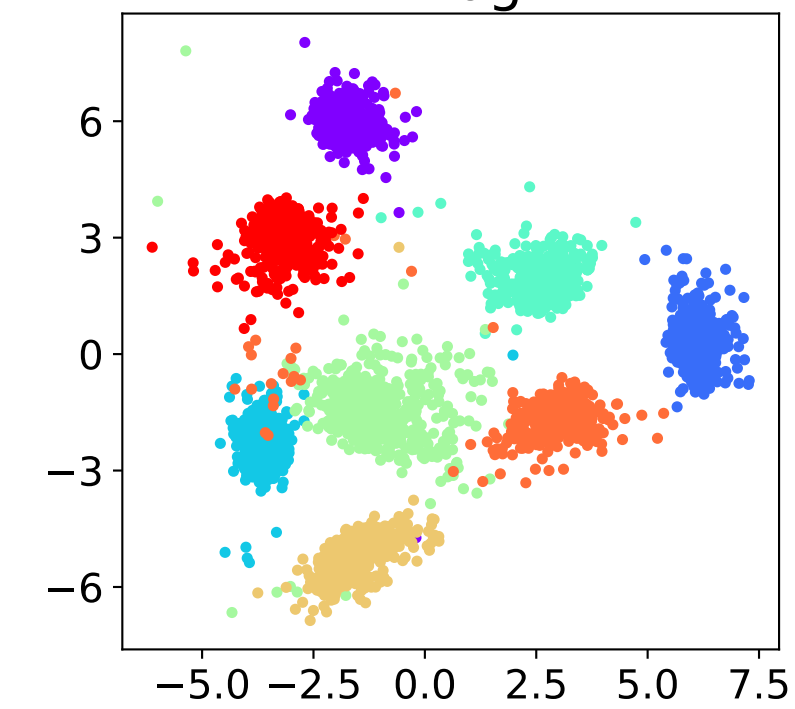 $D_P$ 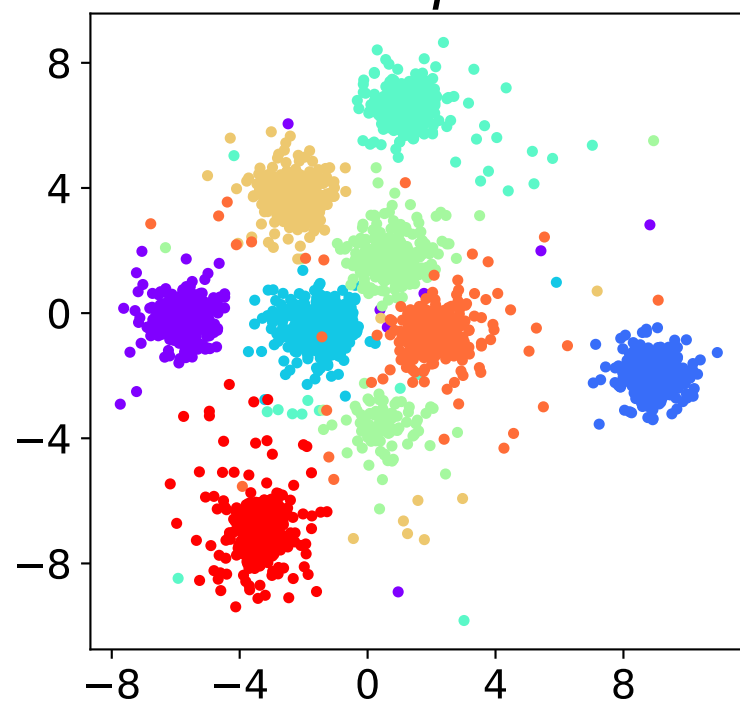 $D_{NB}$ 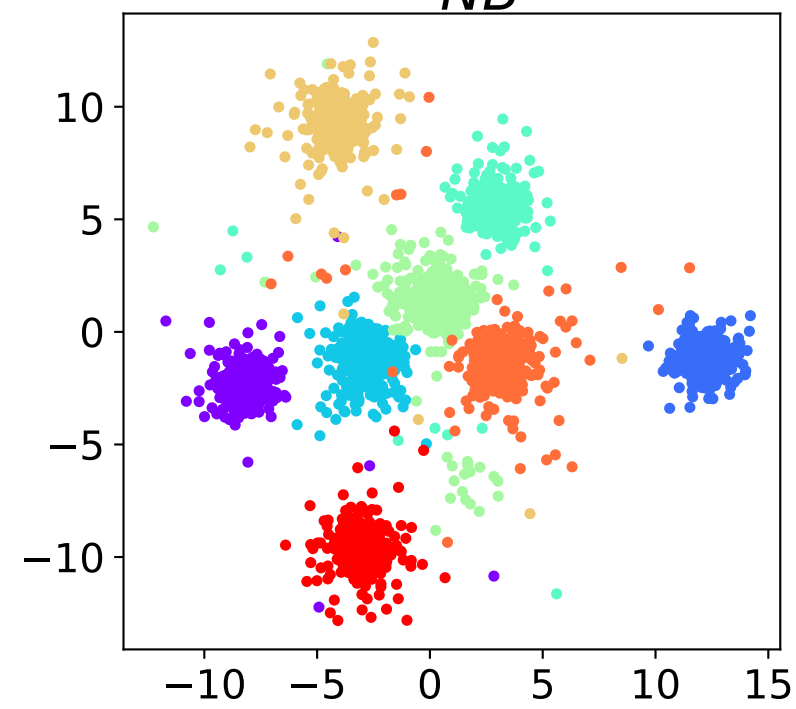

Supplement: supplementary_material [file attachment]

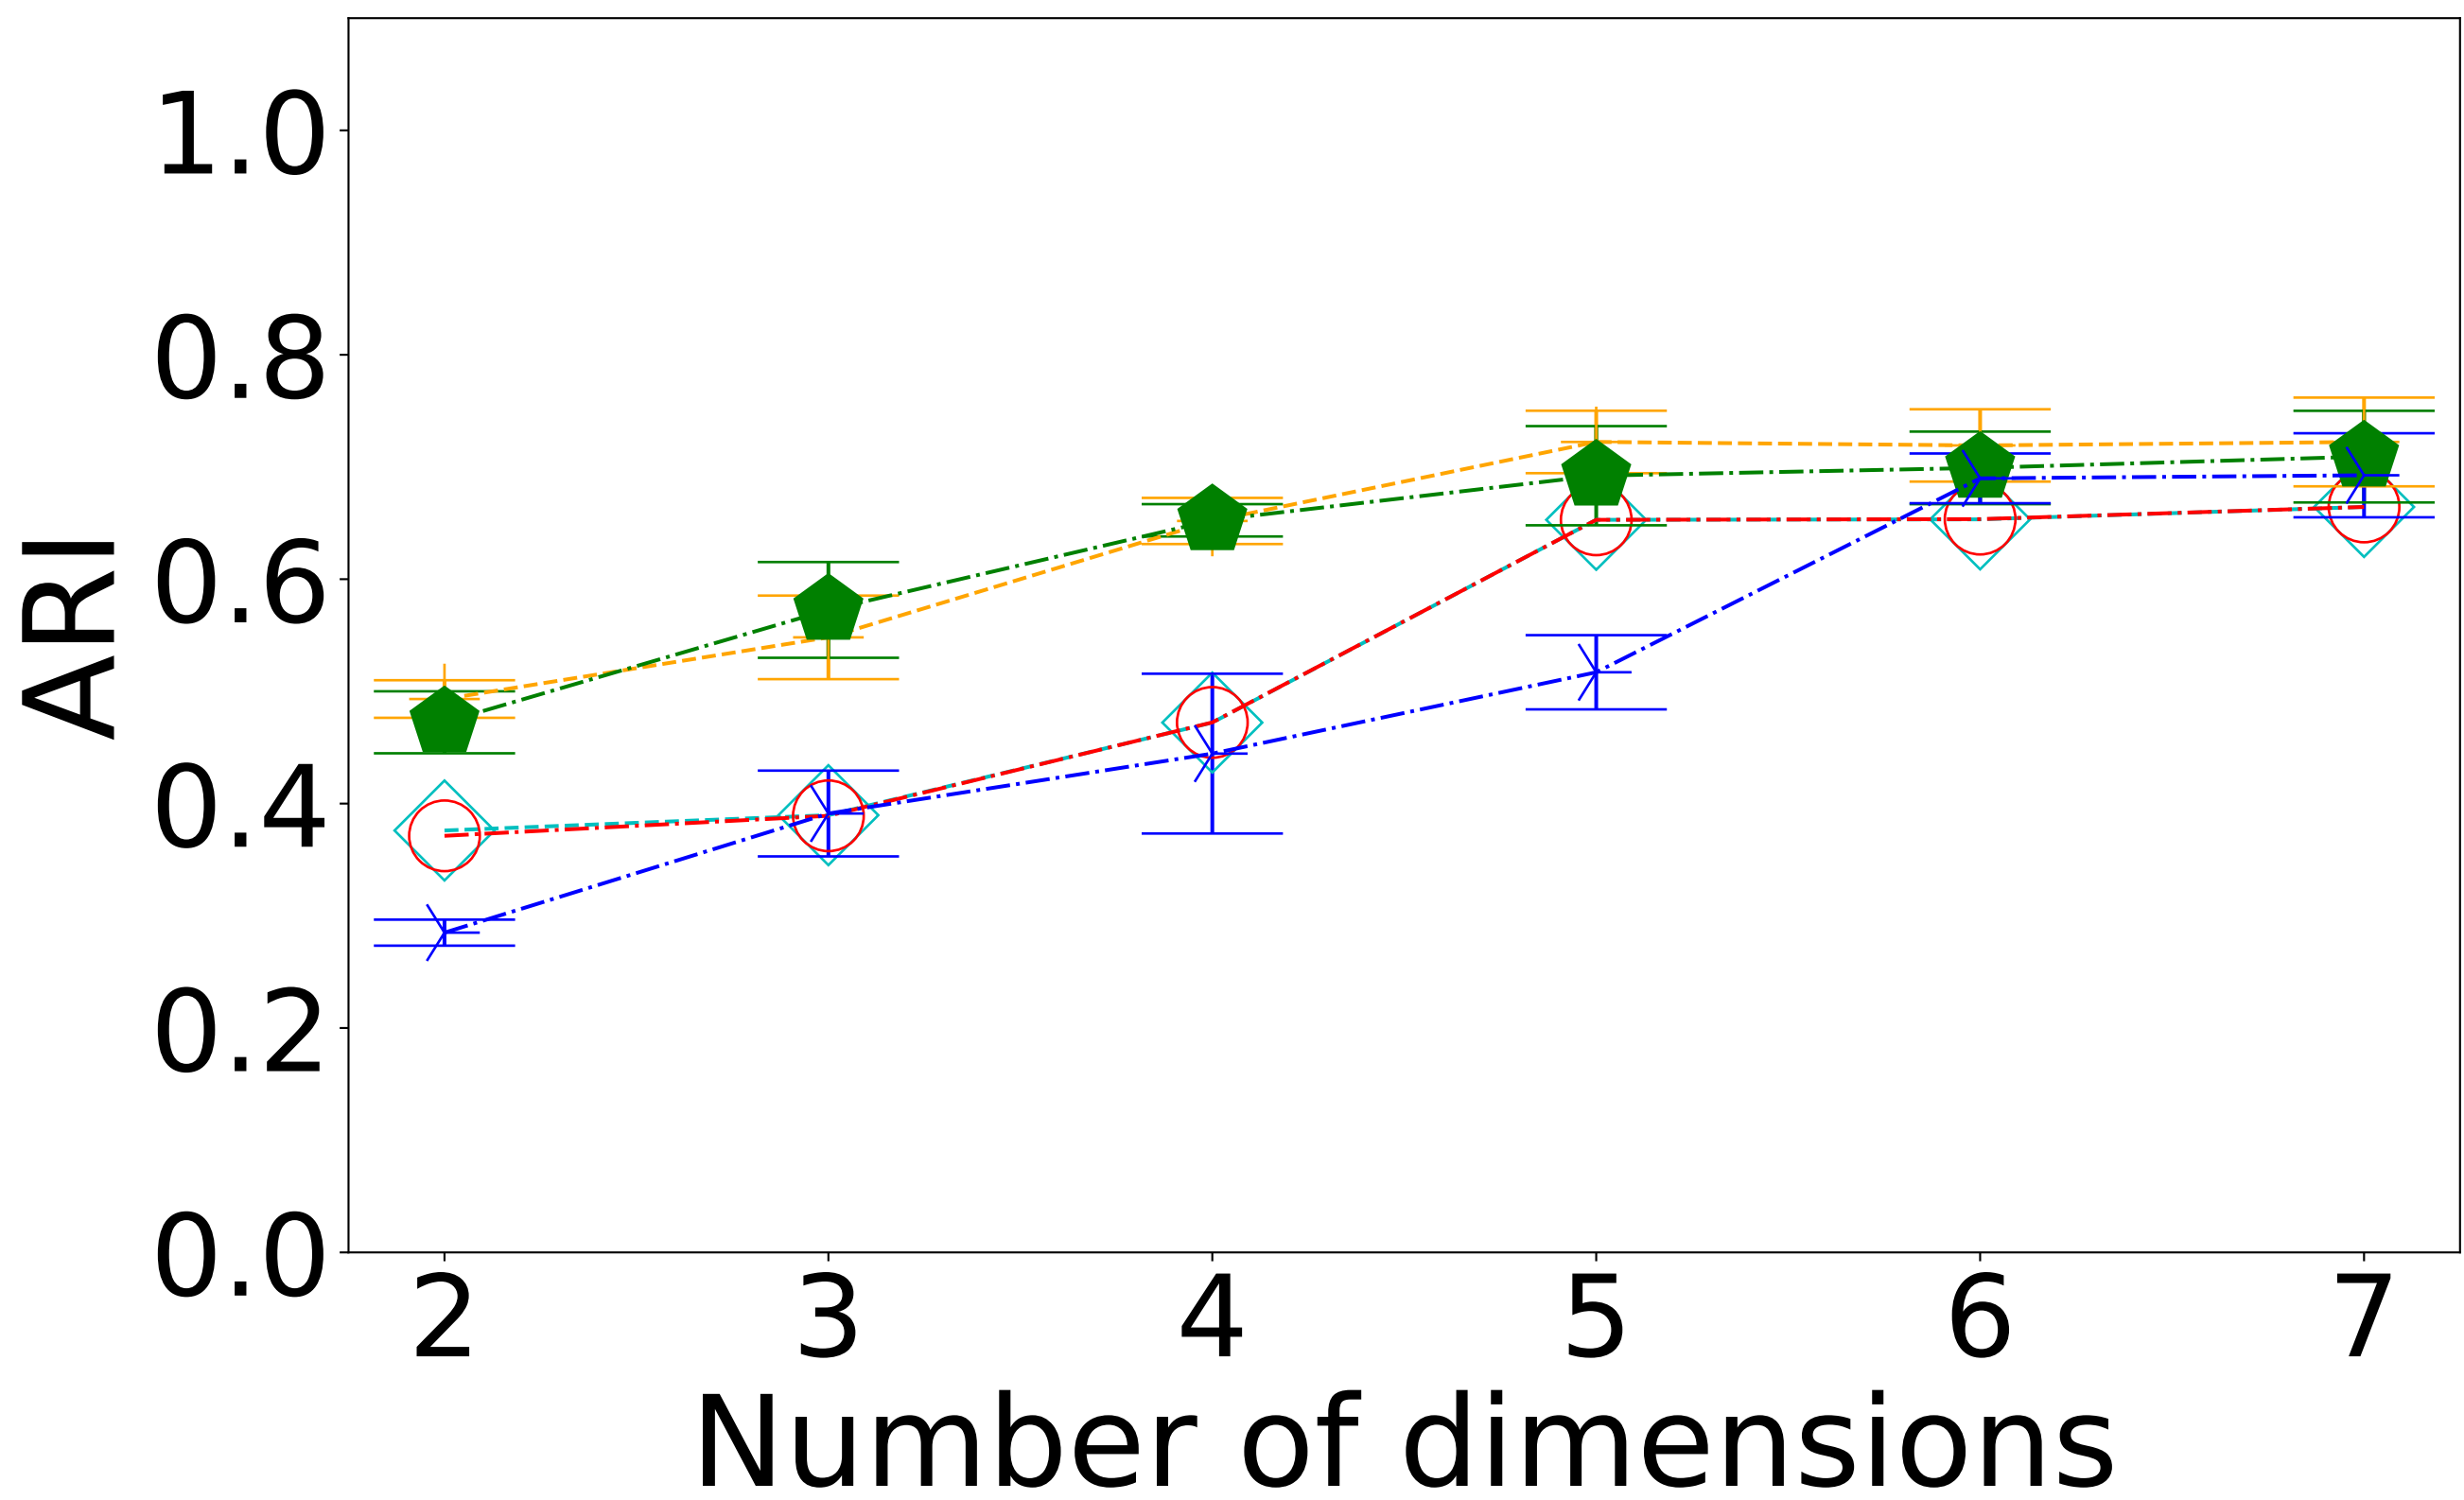

Supplement: supplementary_material [file attachment]

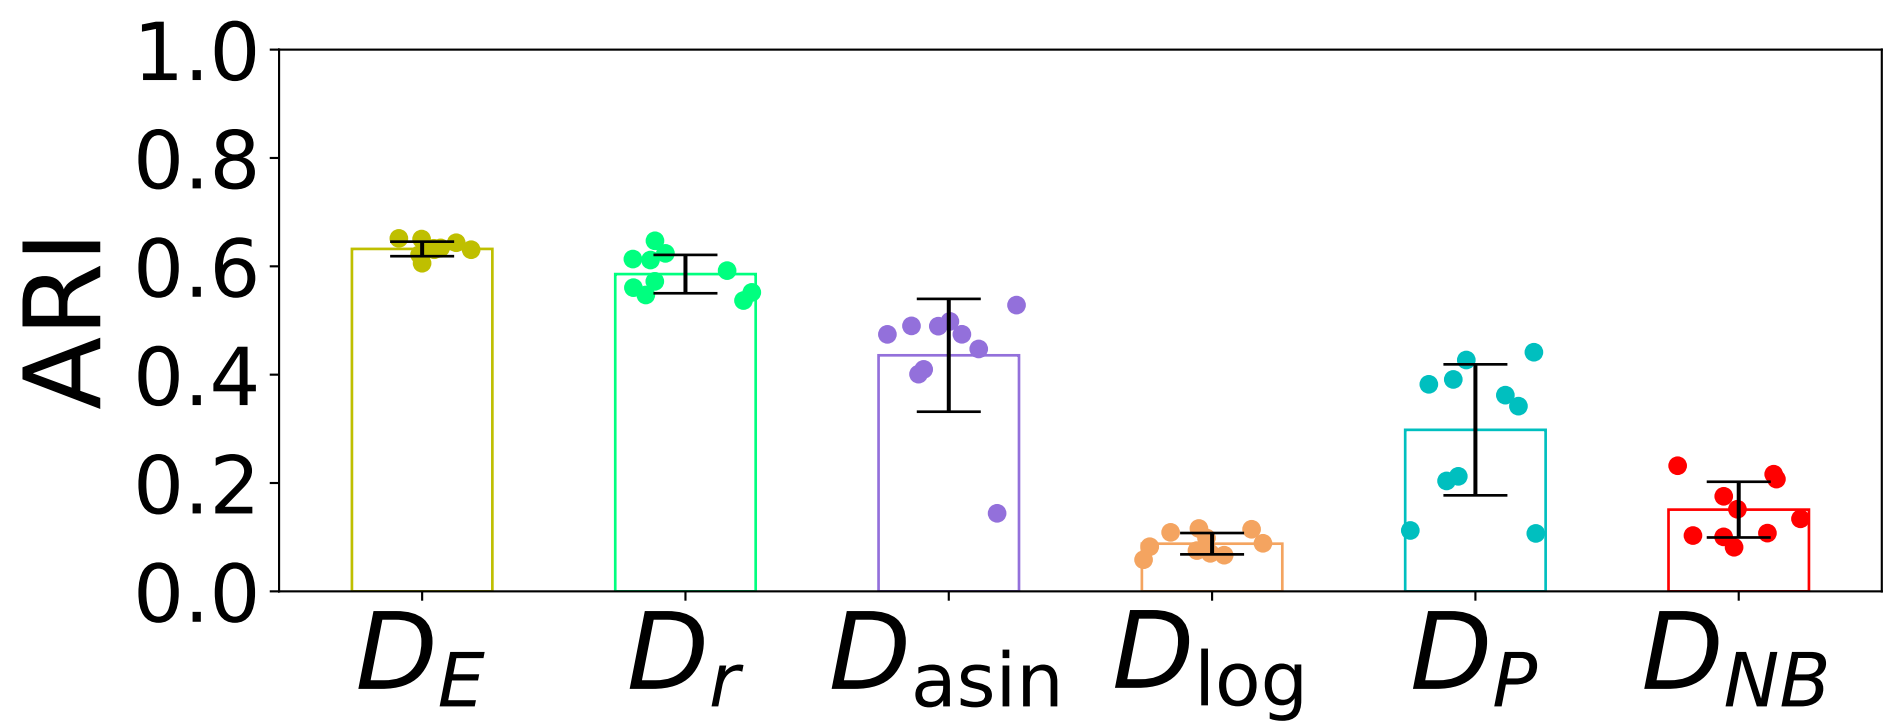

Supplement: supplementary_material [file attachment]

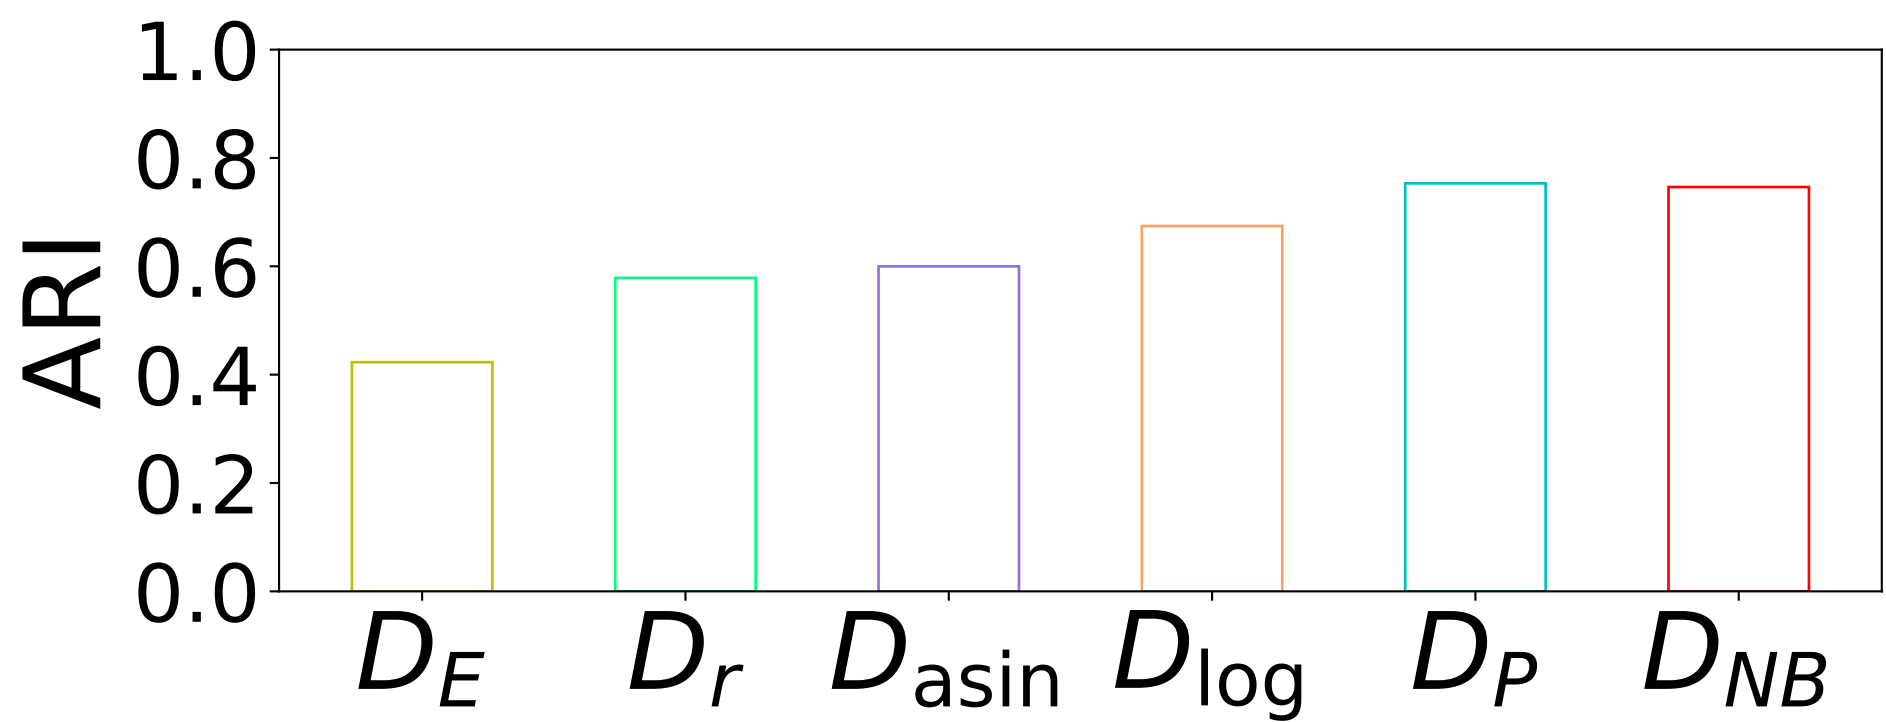

Supplement: supplementary_material [file attachment]

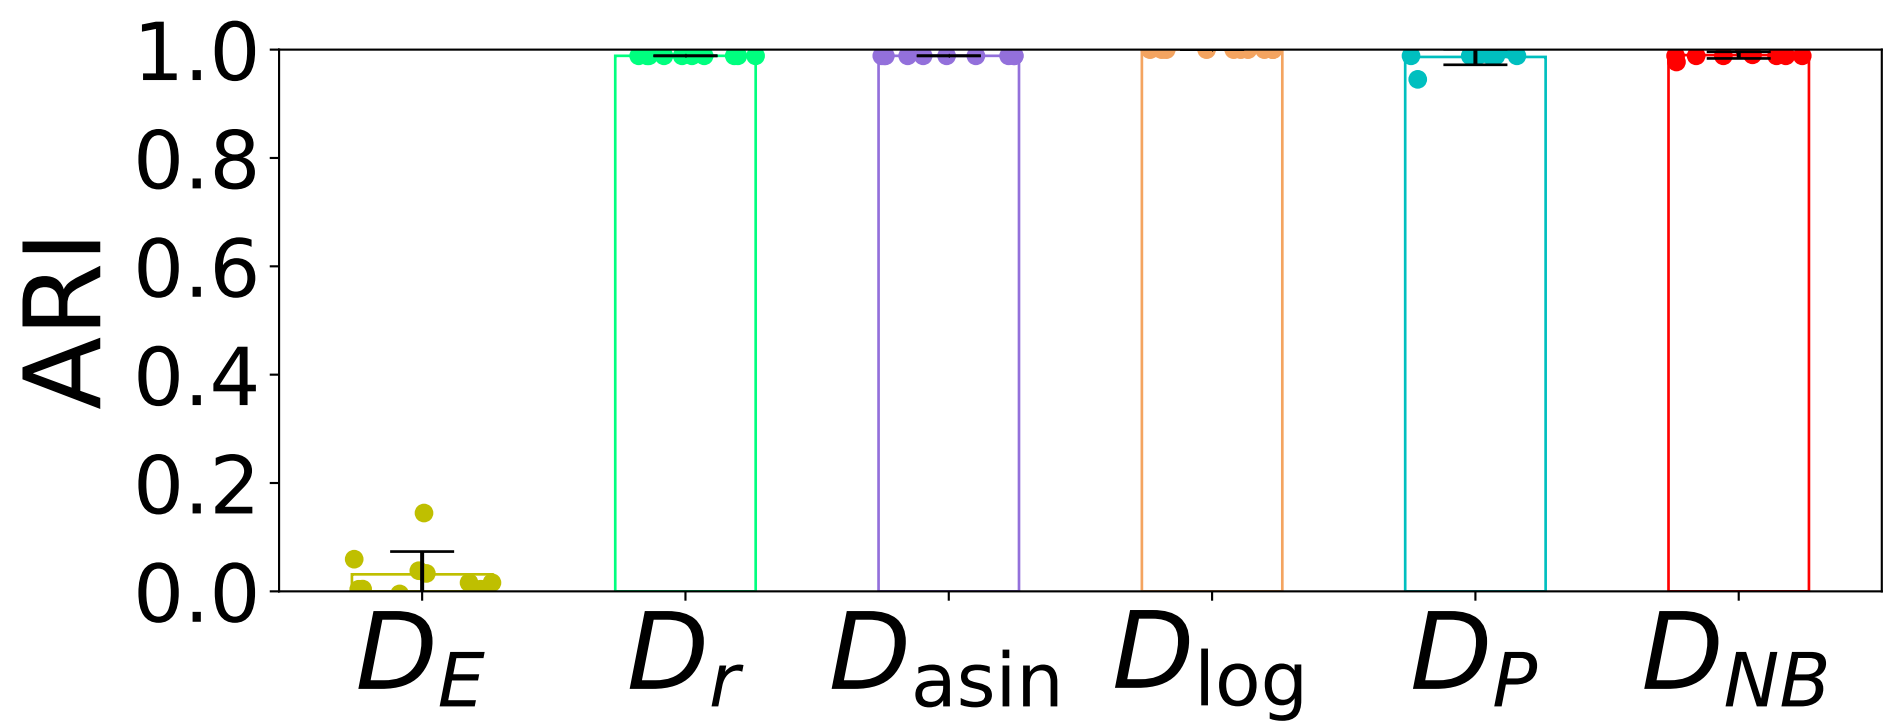

Supplement: supplementary_material [file attachment]

$D_E$ 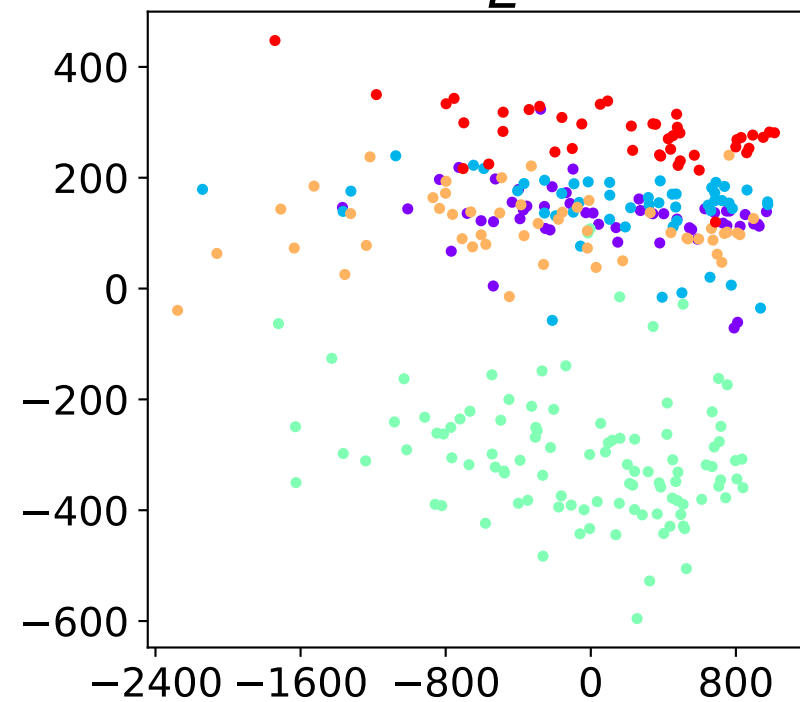 $D_r$ 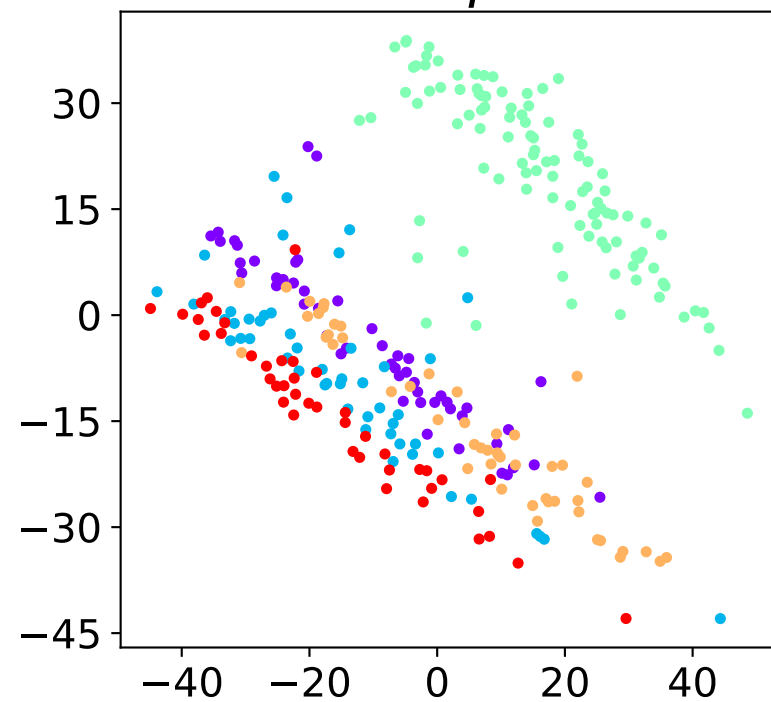 $D_{\text{asin}}$ 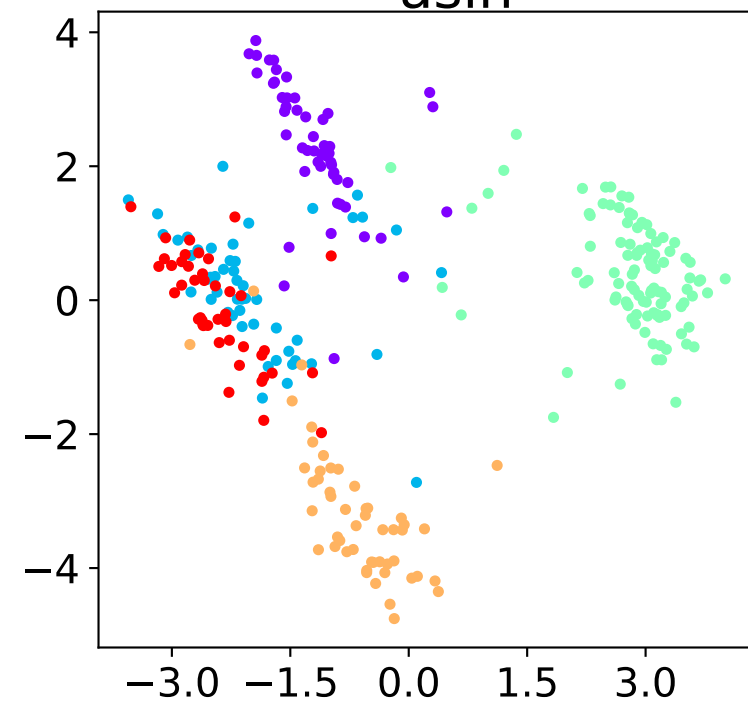 $D_{\text{log}}$ 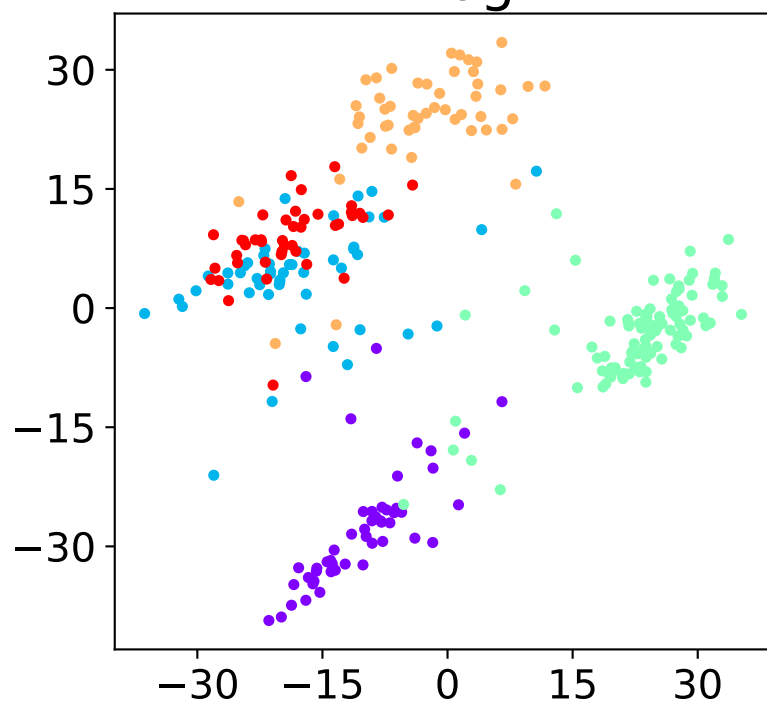 $D_P$ 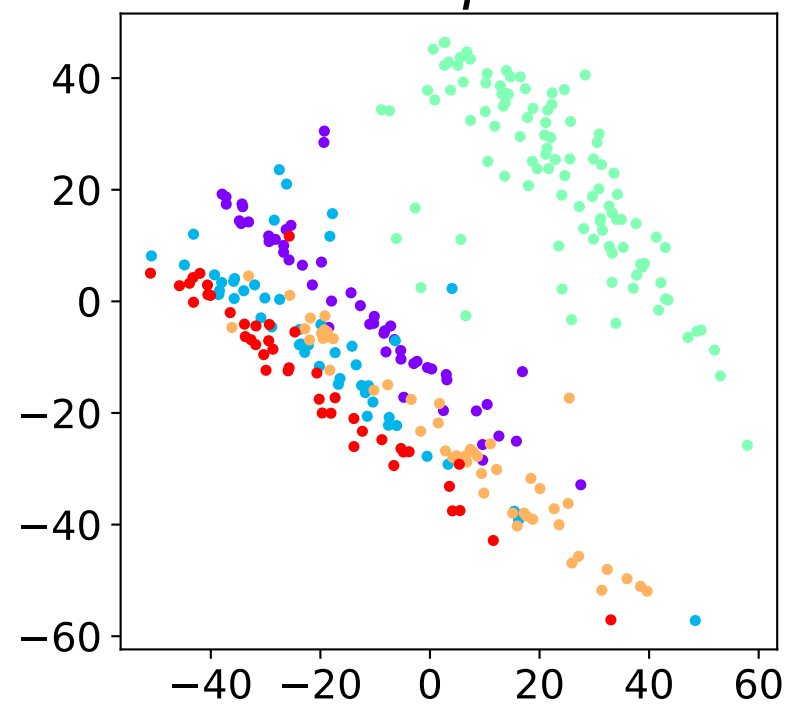 $D_{NB}$ 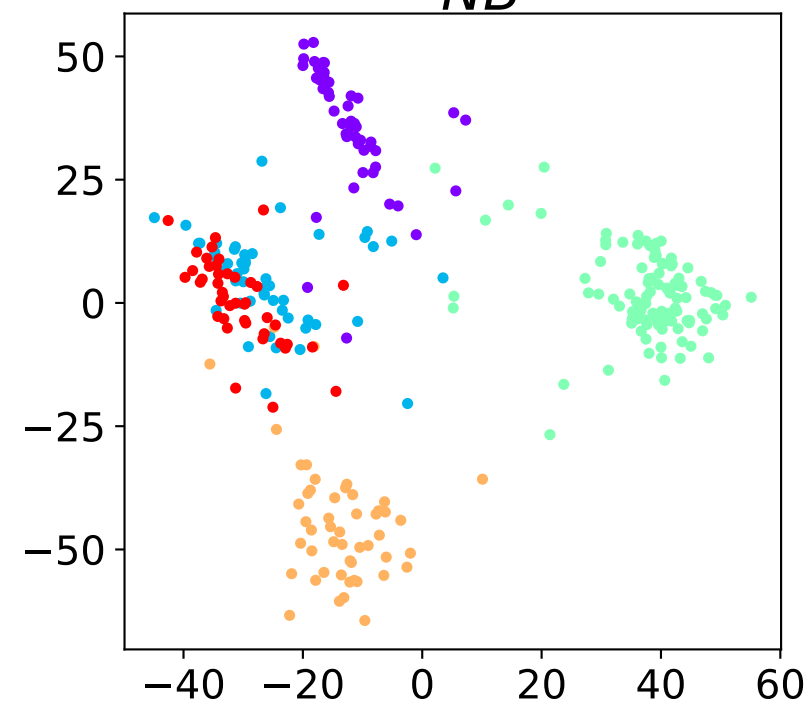

Supplement: supplementary_material [file attachment]

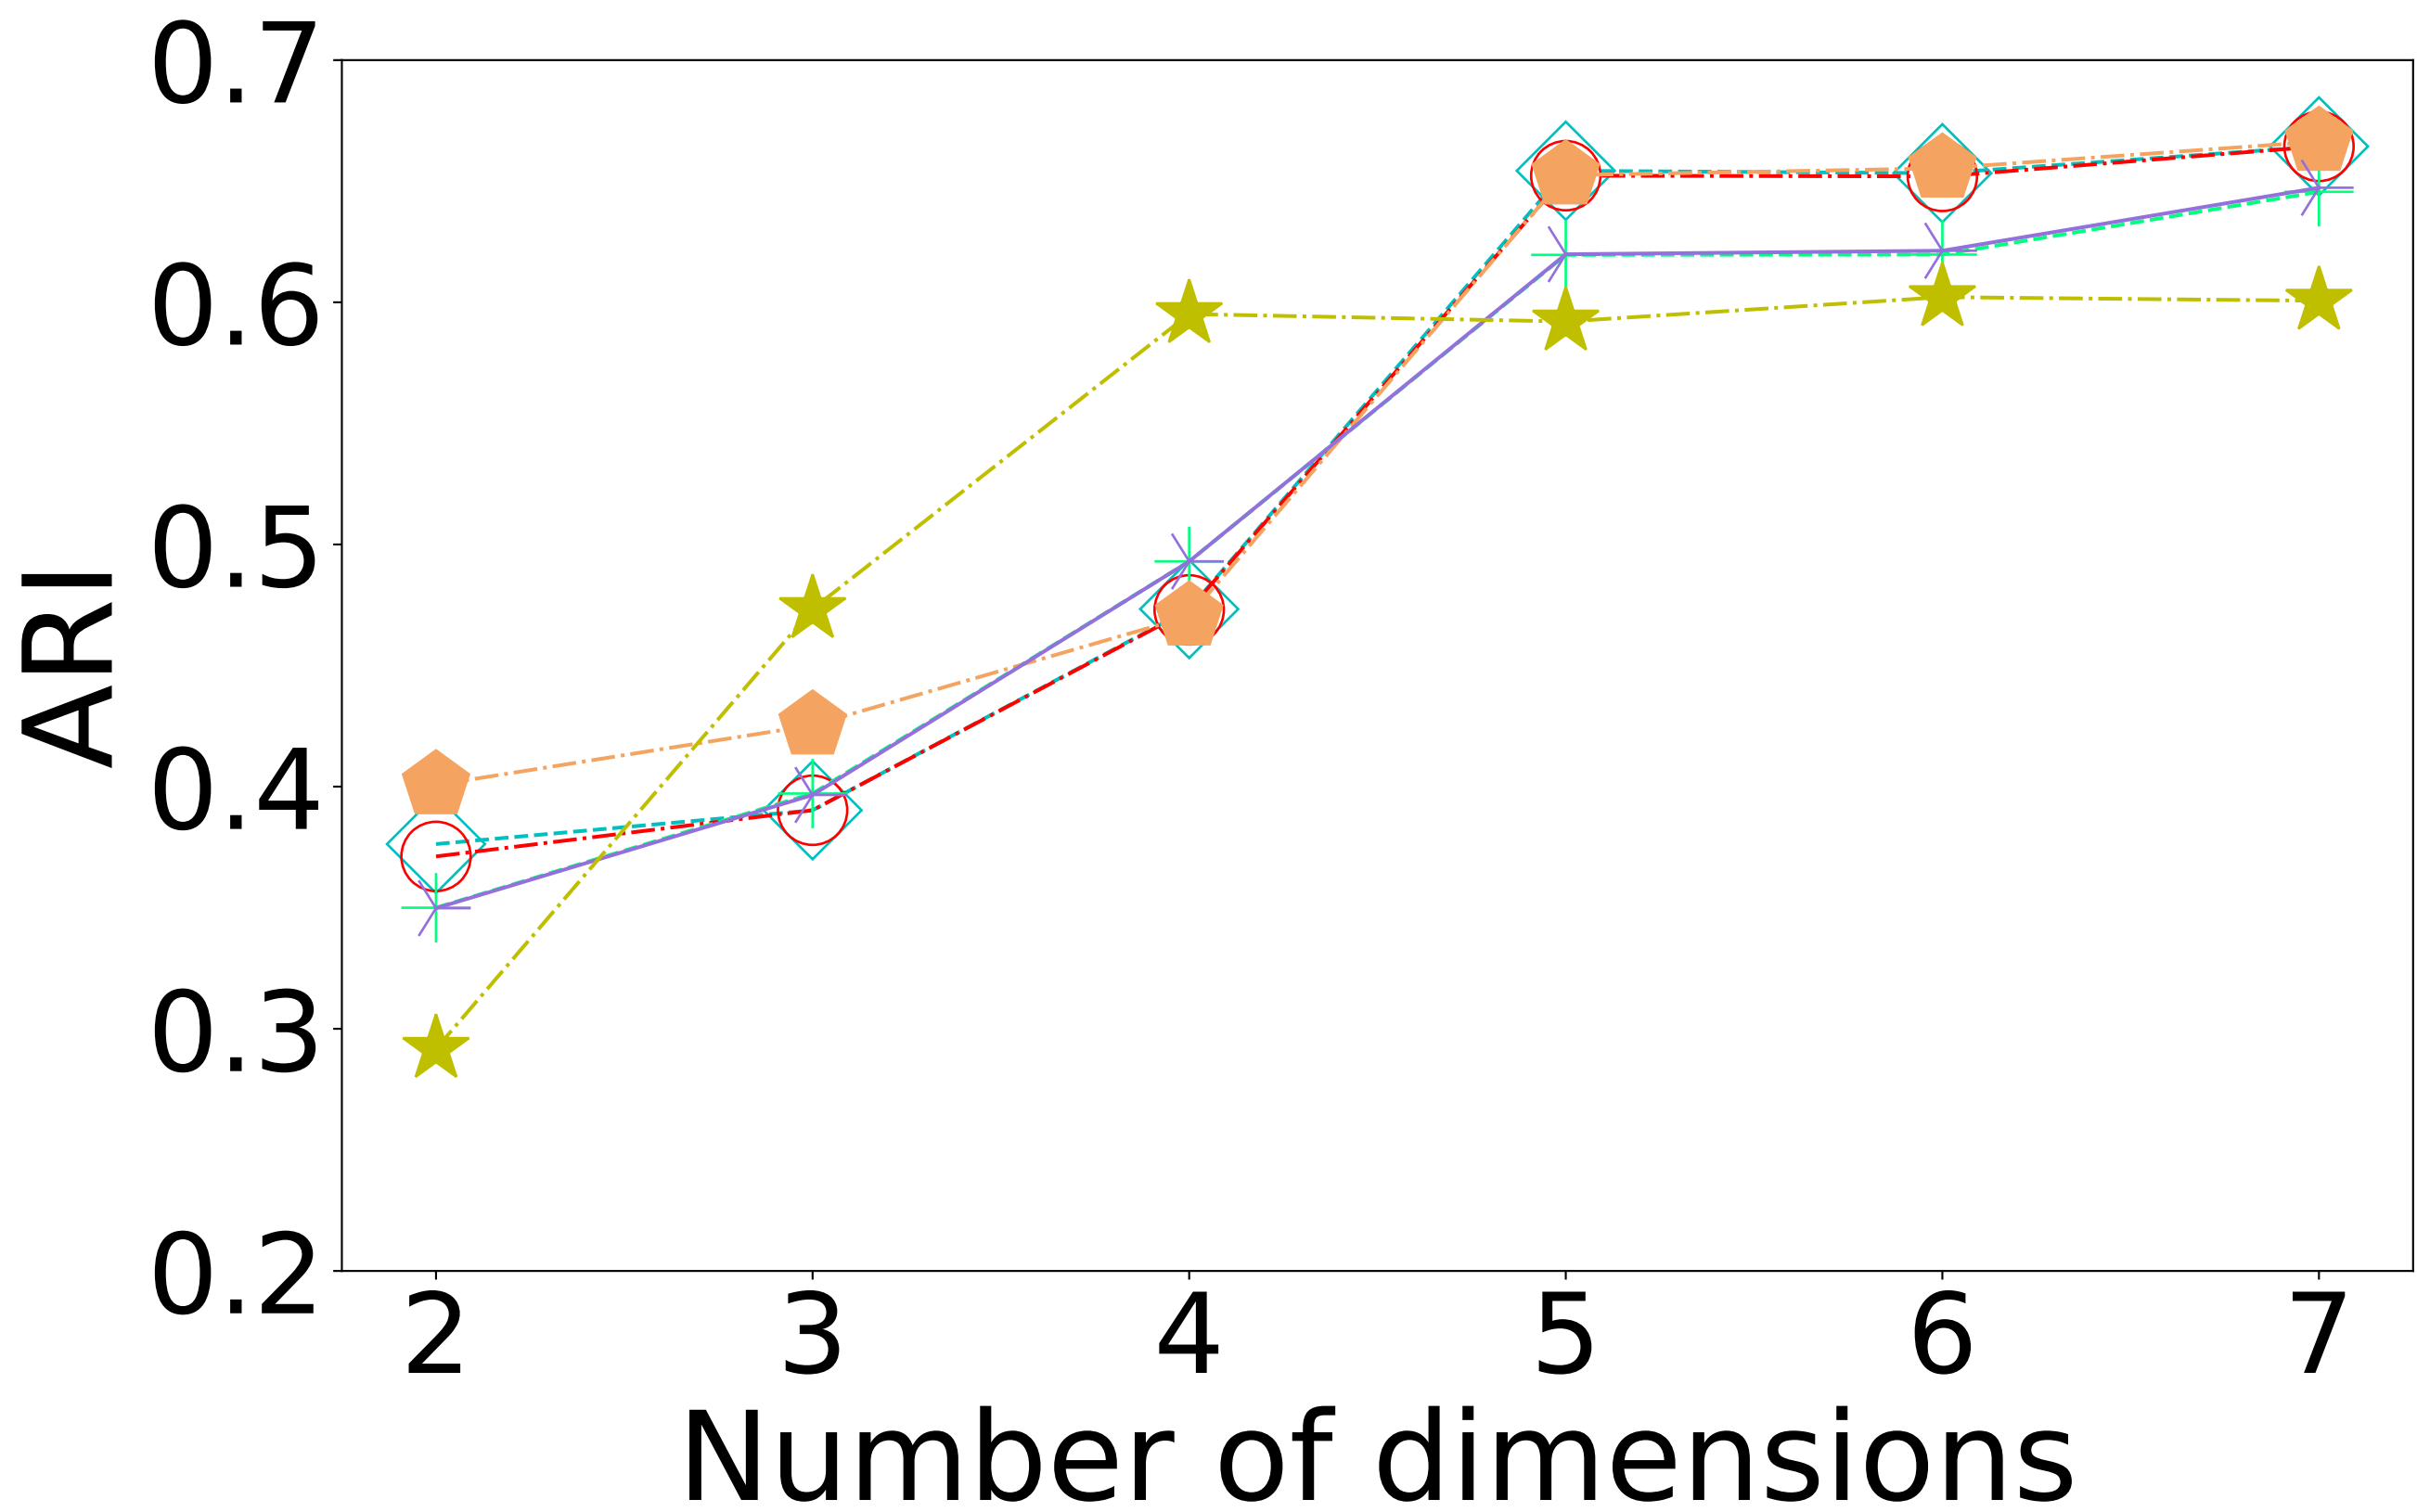

Supplement: supplementary_material [file attachment]

$D_E$ 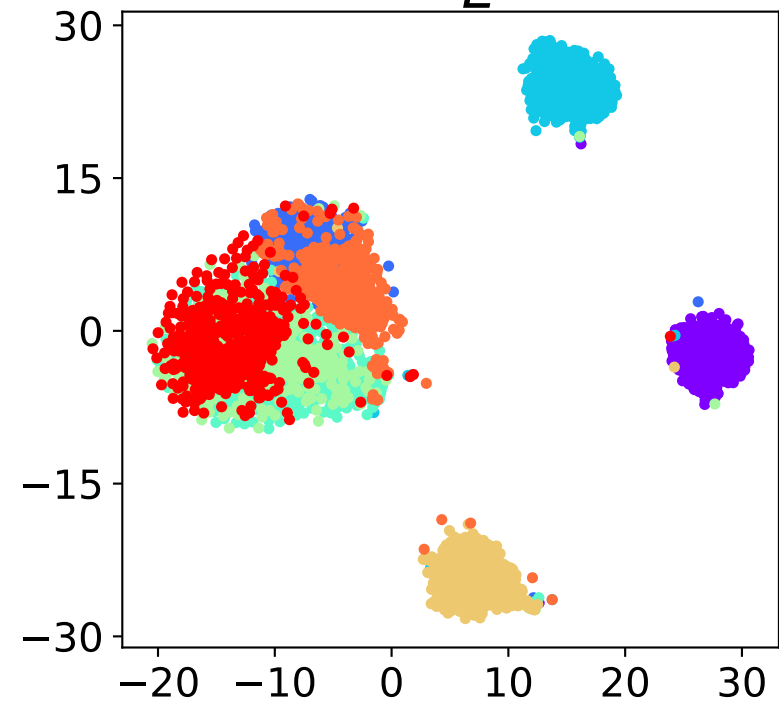 $D_r$ 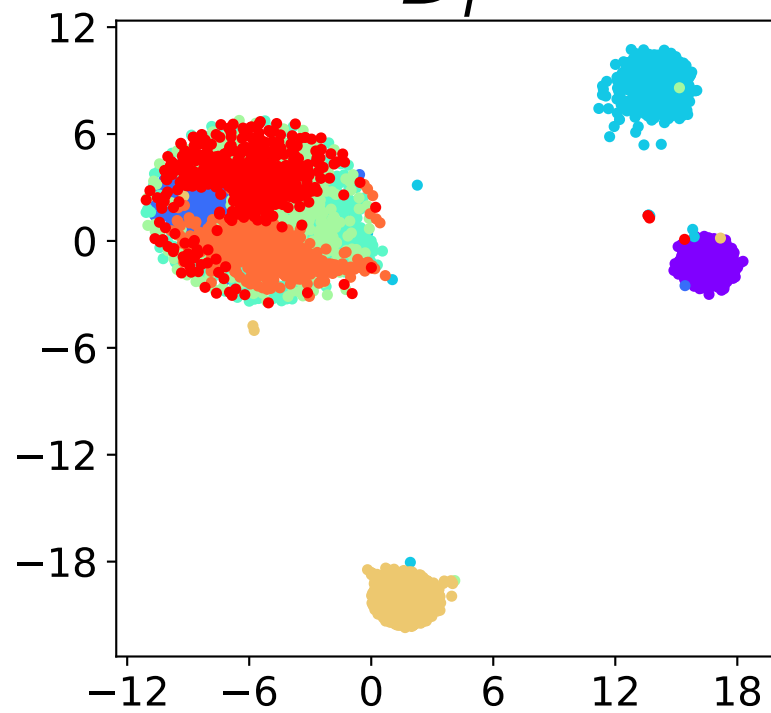 $D_{\text{asin}}$ 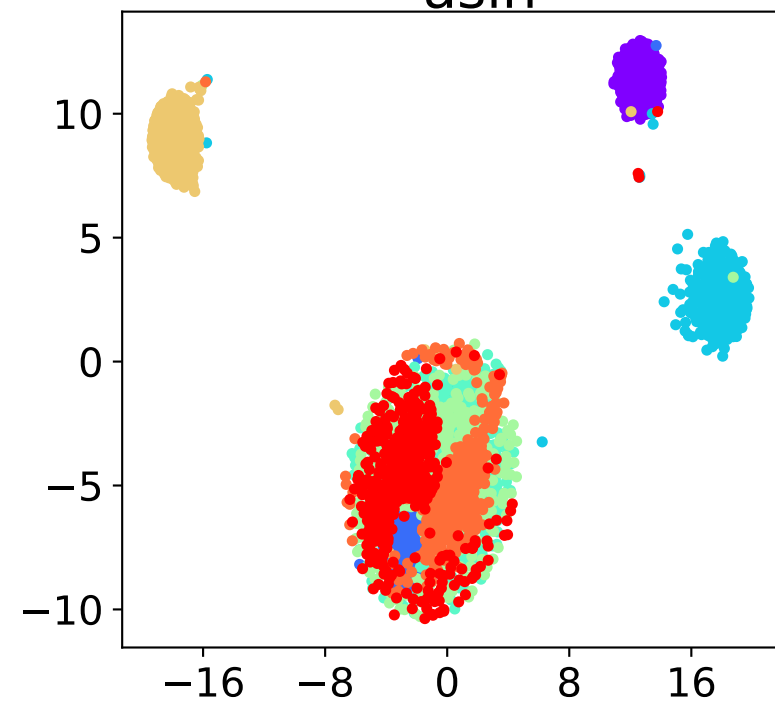 $D_{\text{log}}$ 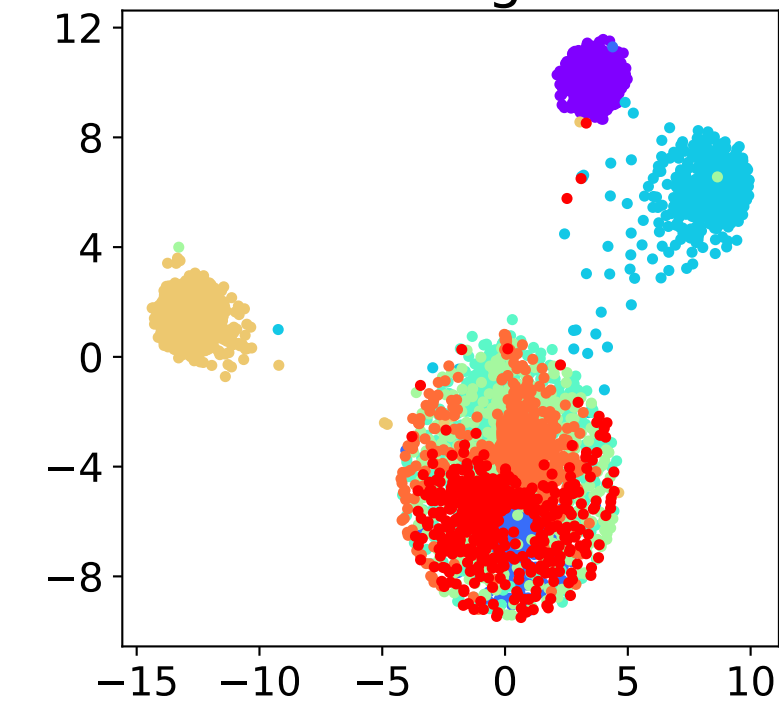 $D_P$ 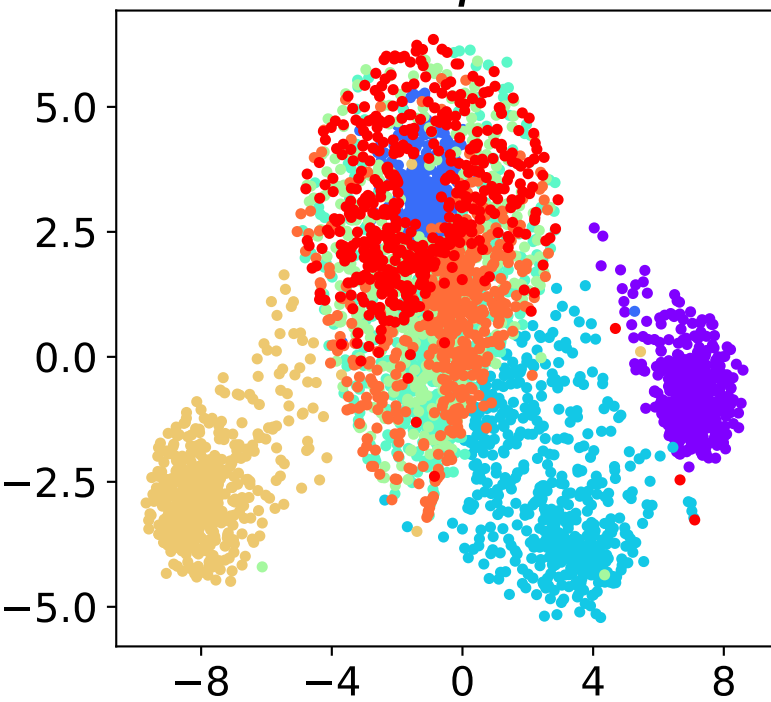 $D_{NB}$ 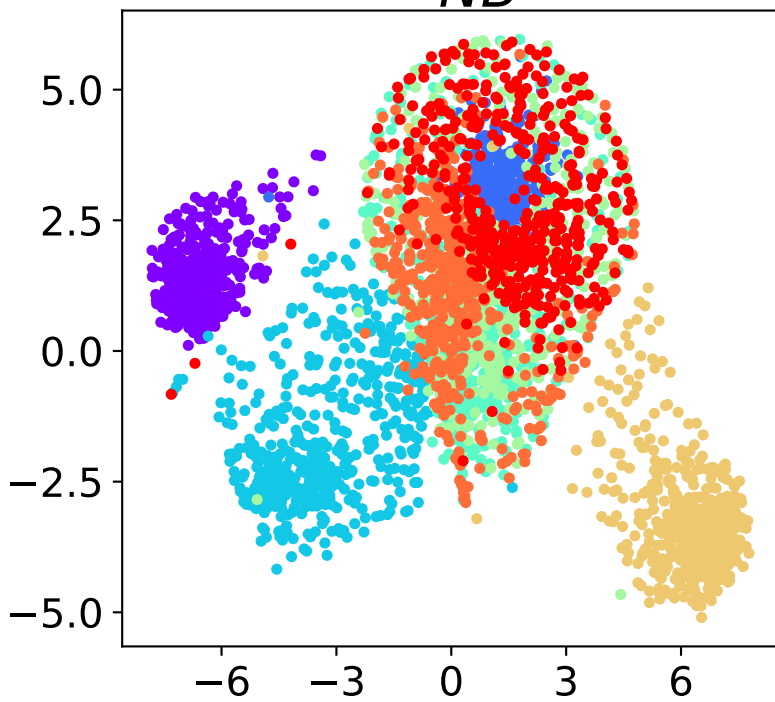

Supplement: supplementary_material [file attachment]

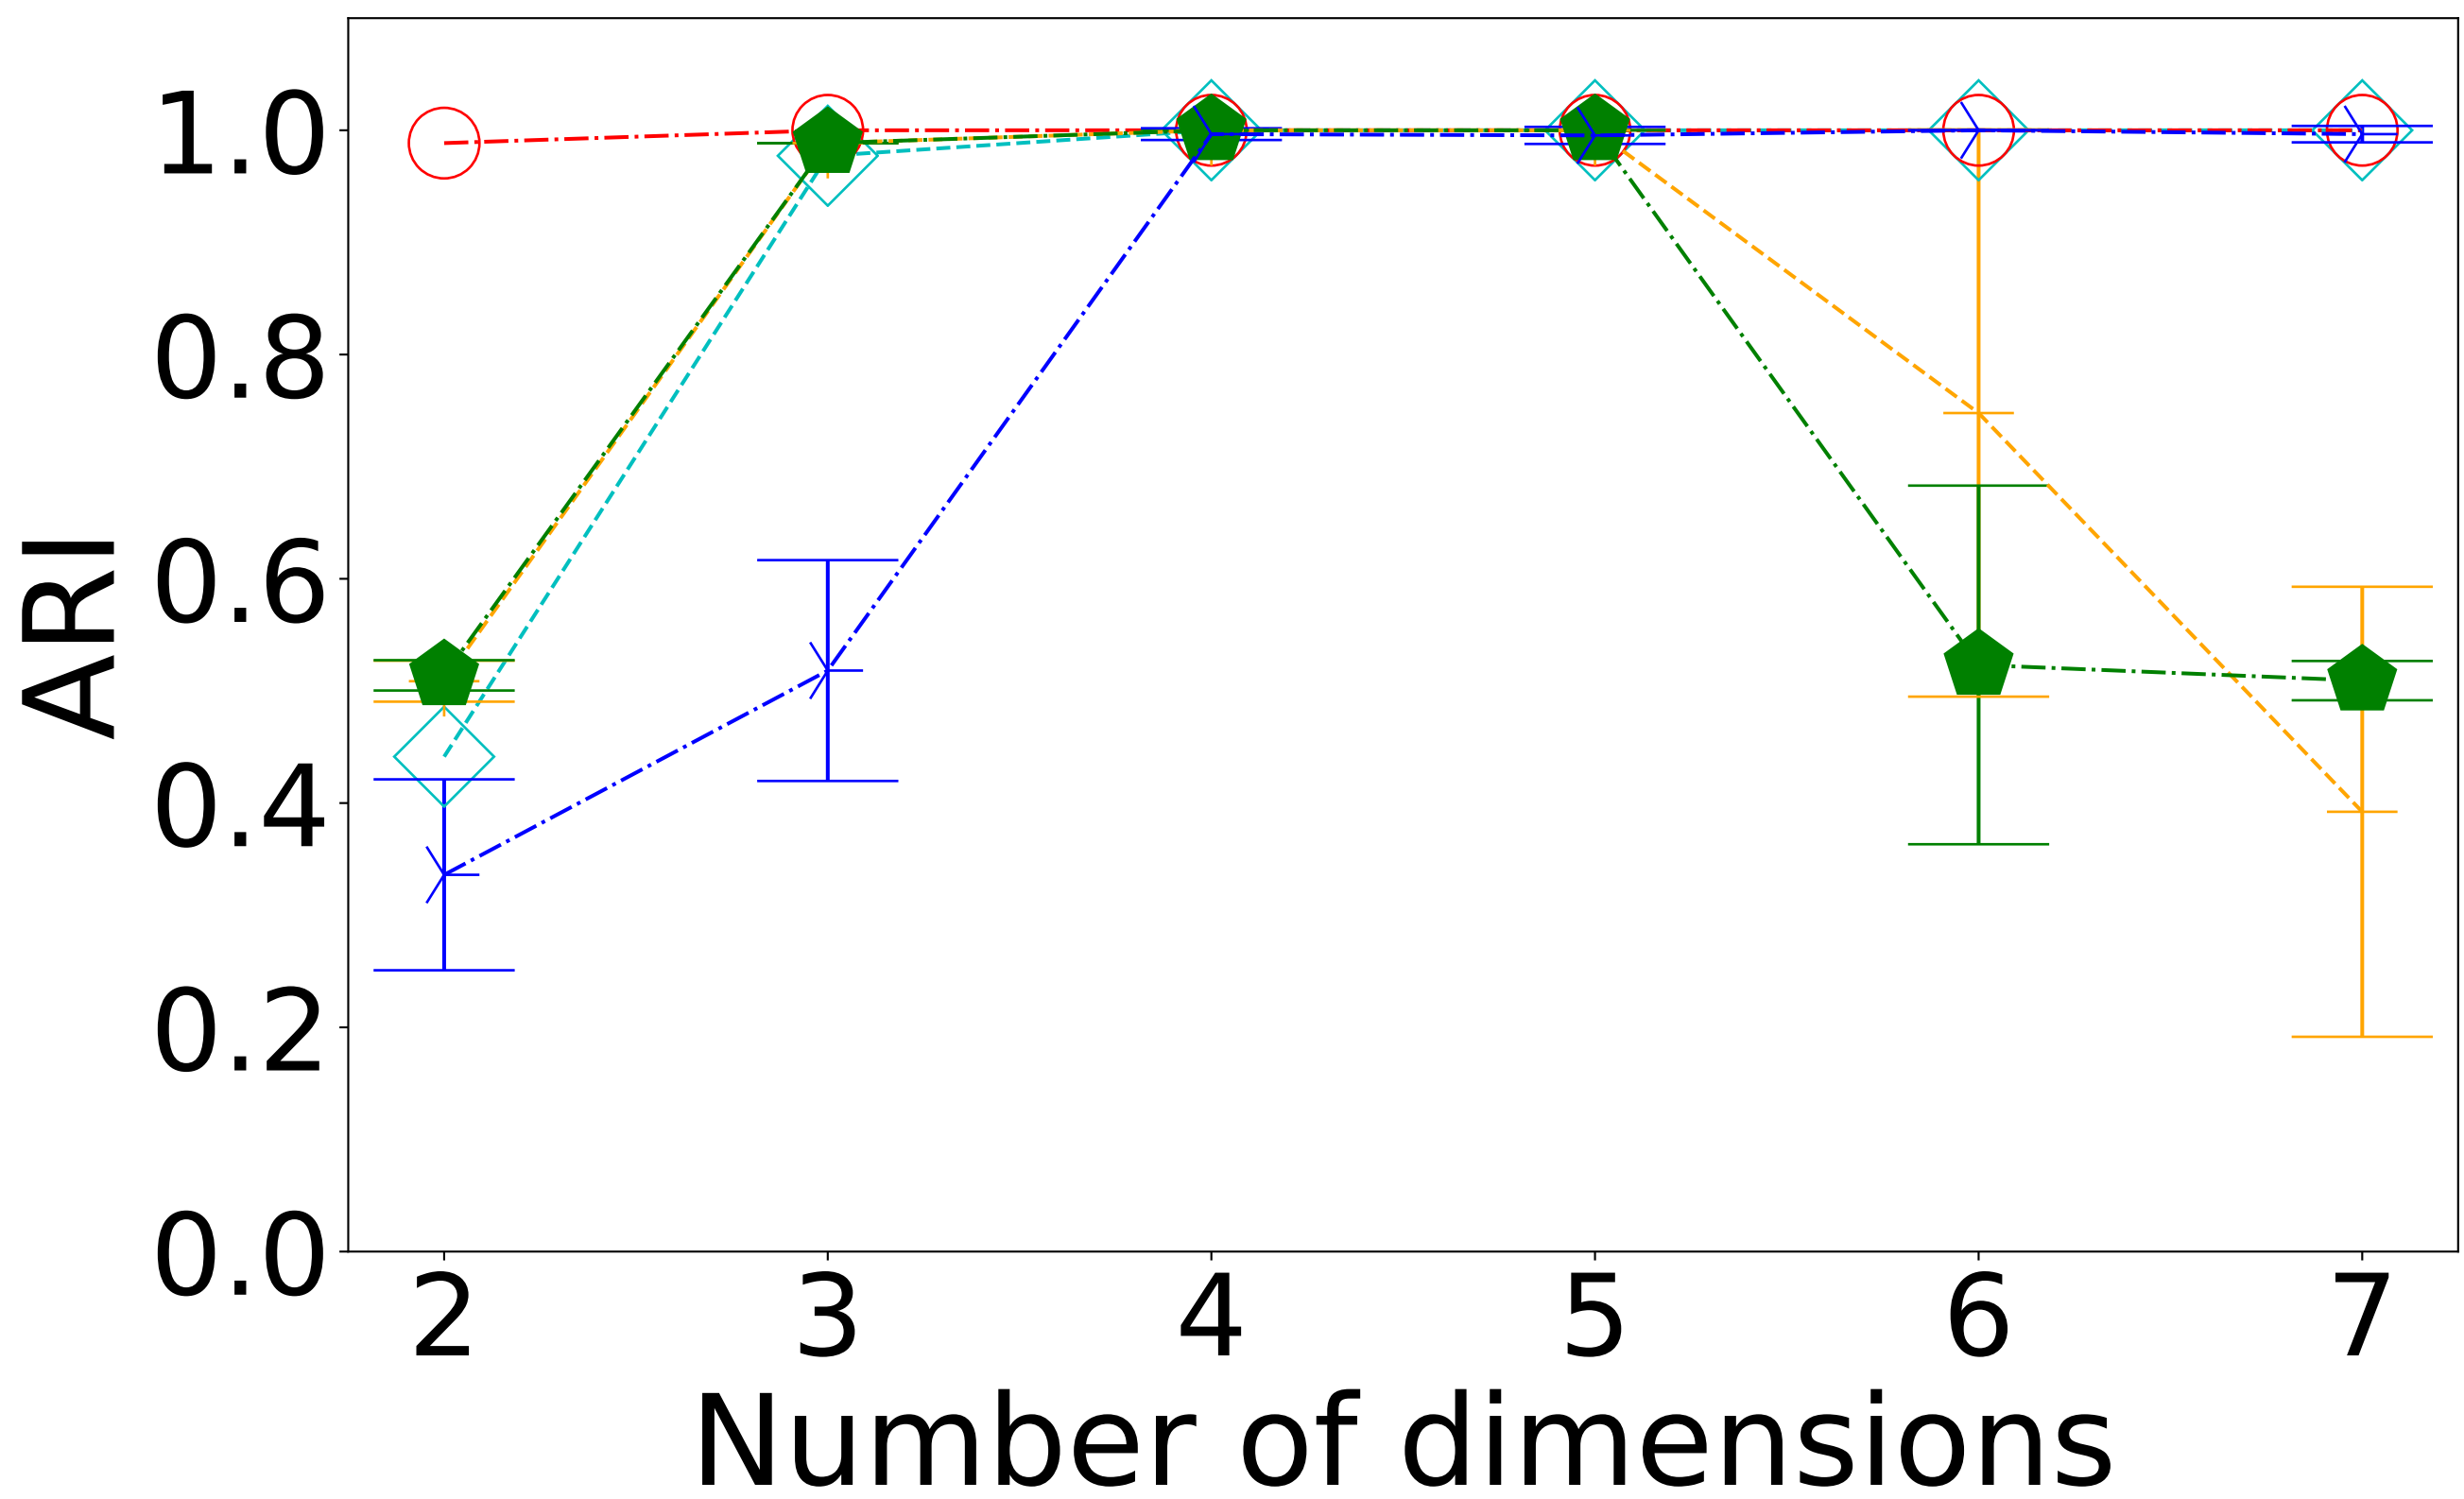

Supplement: supplementary_material [file attachment]

$D_E$ 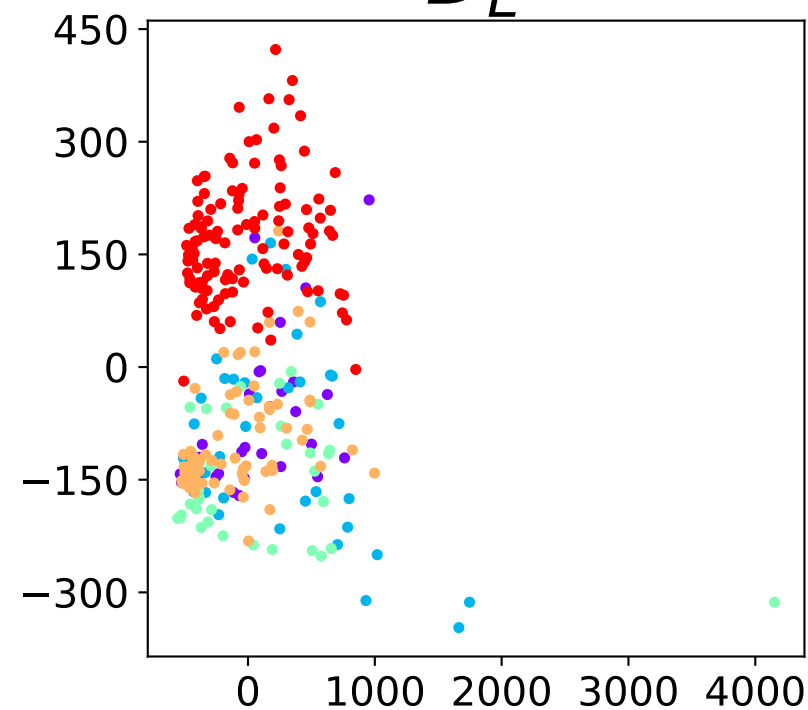 $D_r$ 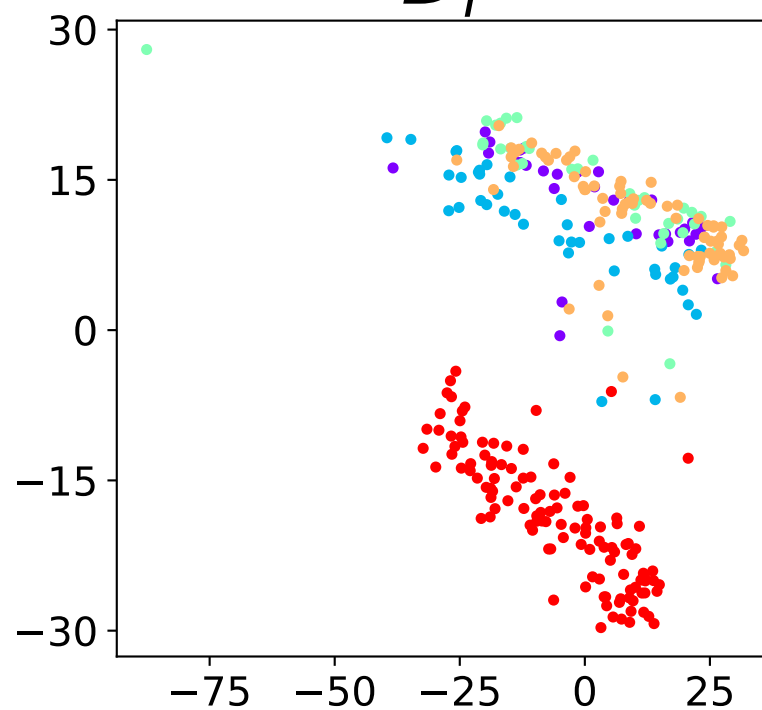 $D_{\text{asin}}$ 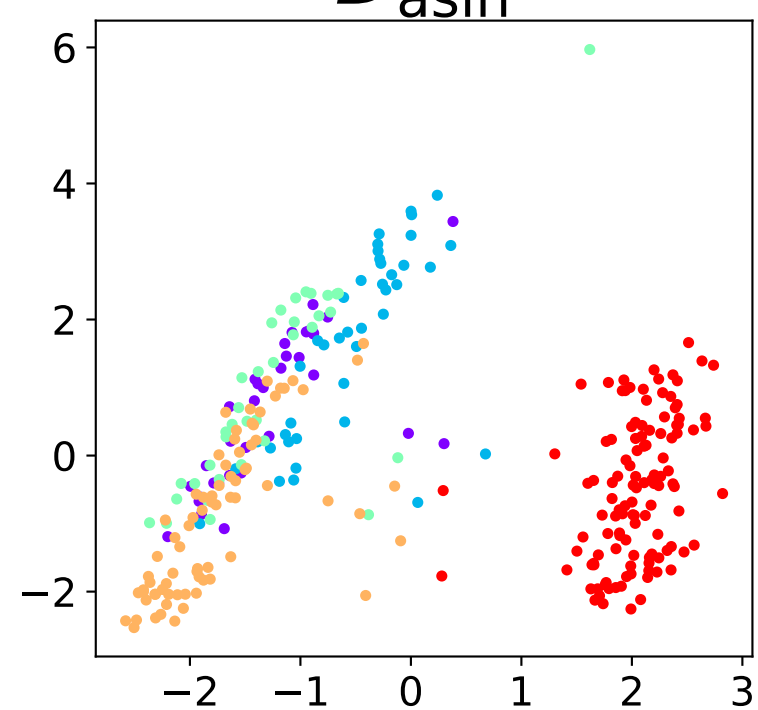 $D_{\text{log}}$ 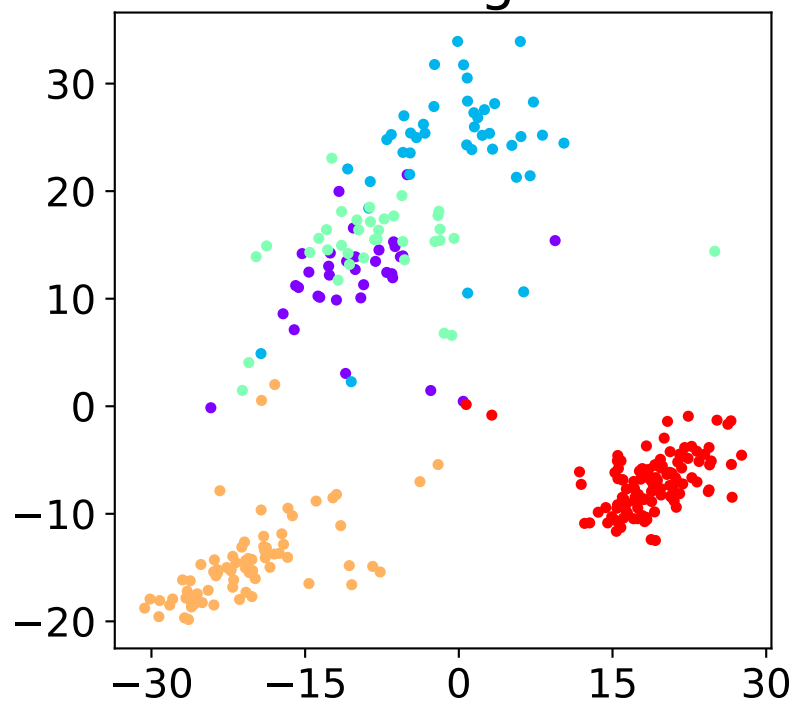 $D_P$ 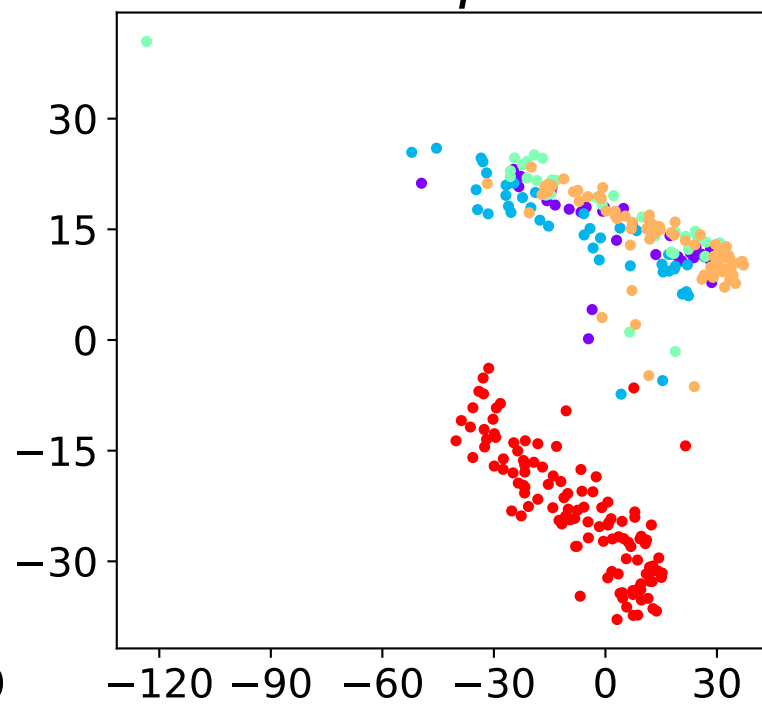 $D_{NB}$ 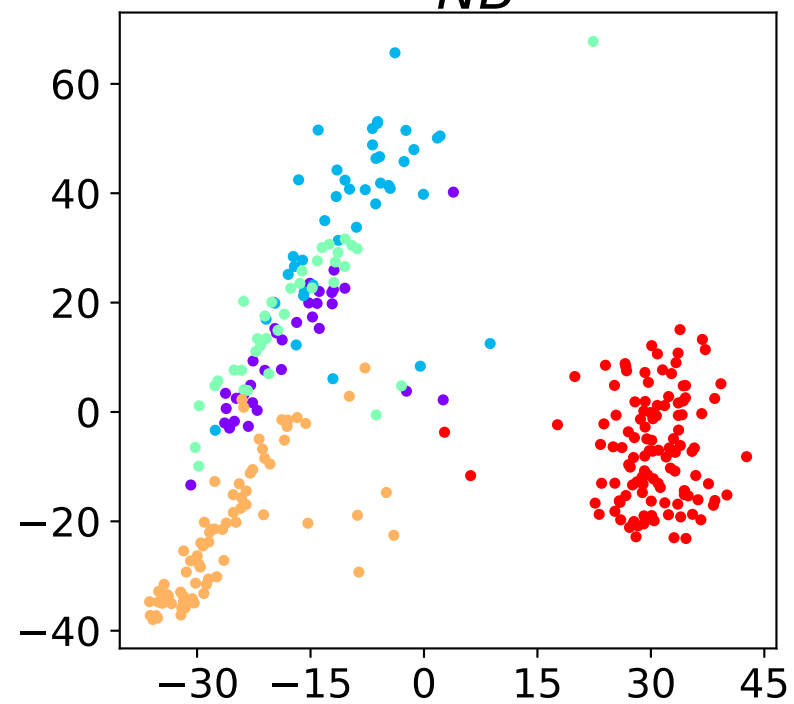

Supplement: supplementary_material [file attachment]

$D_E$ 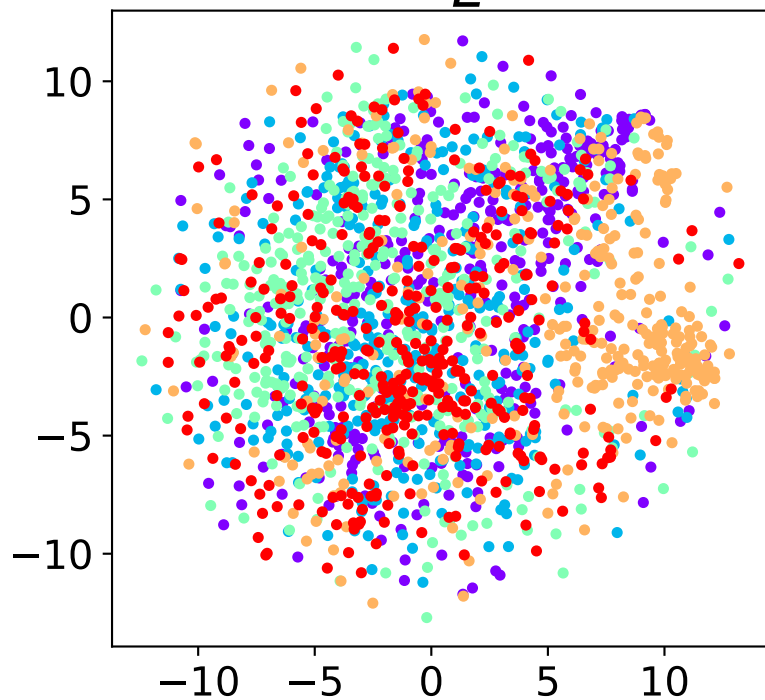 $D_r$ 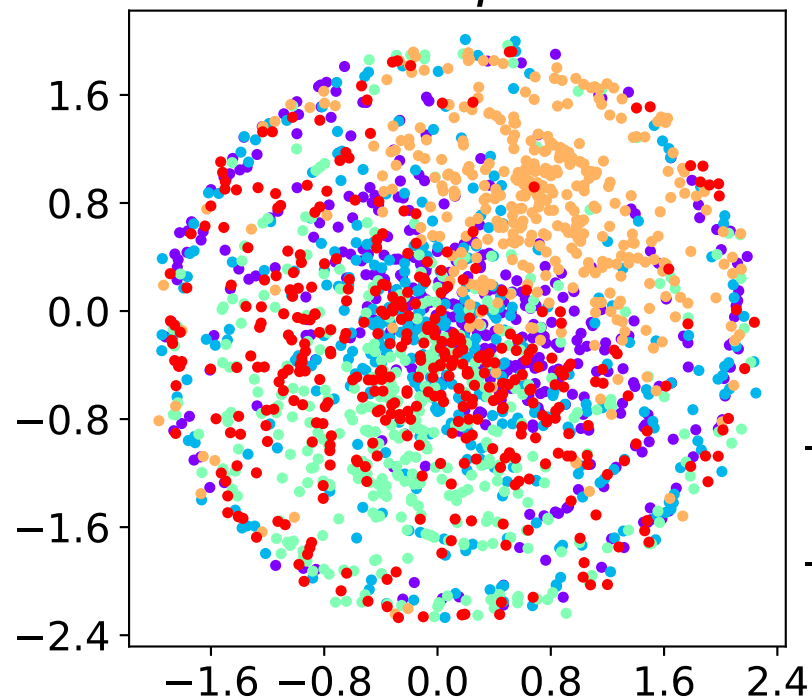 $D_{\text{asin}}$ 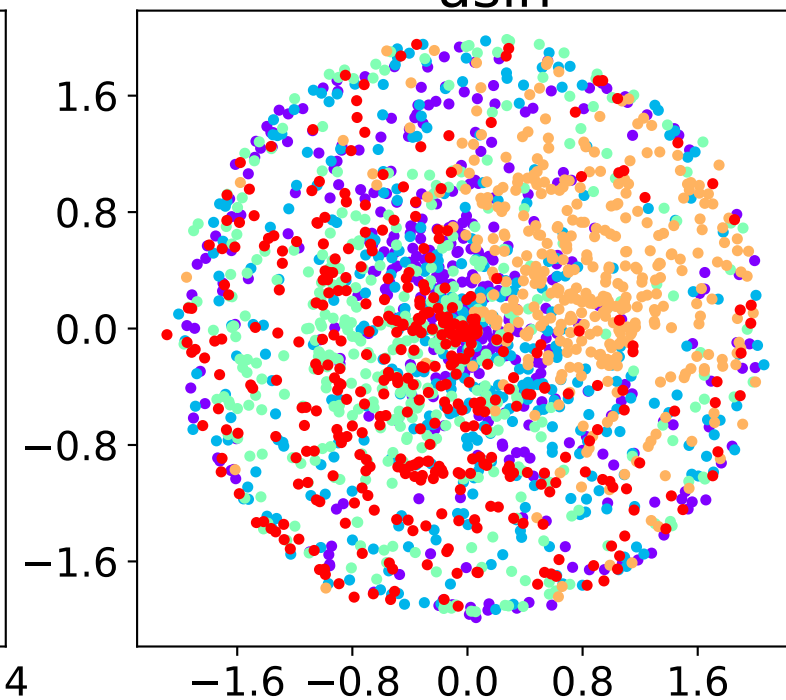 $D_{\text{log}}$ 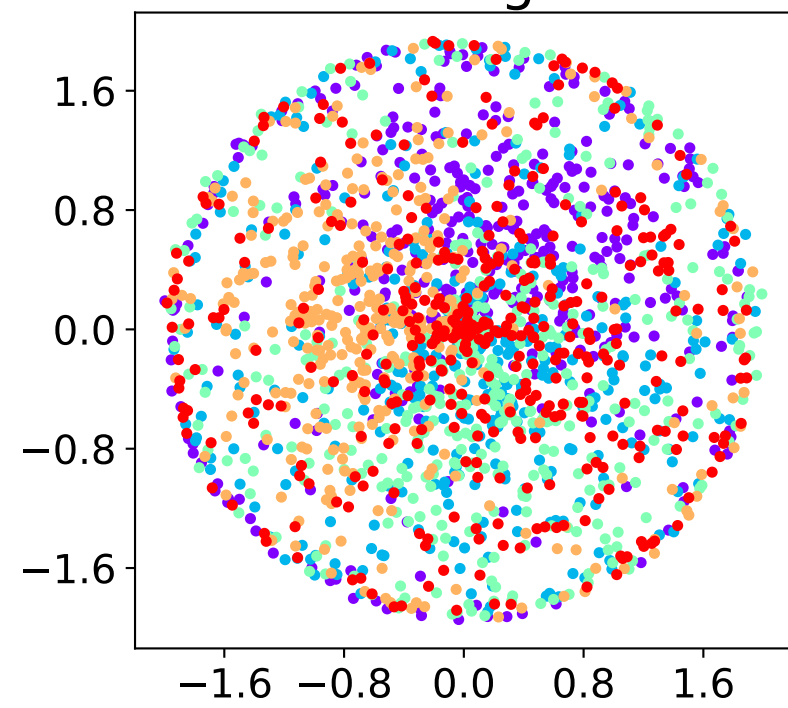 $D_P$ 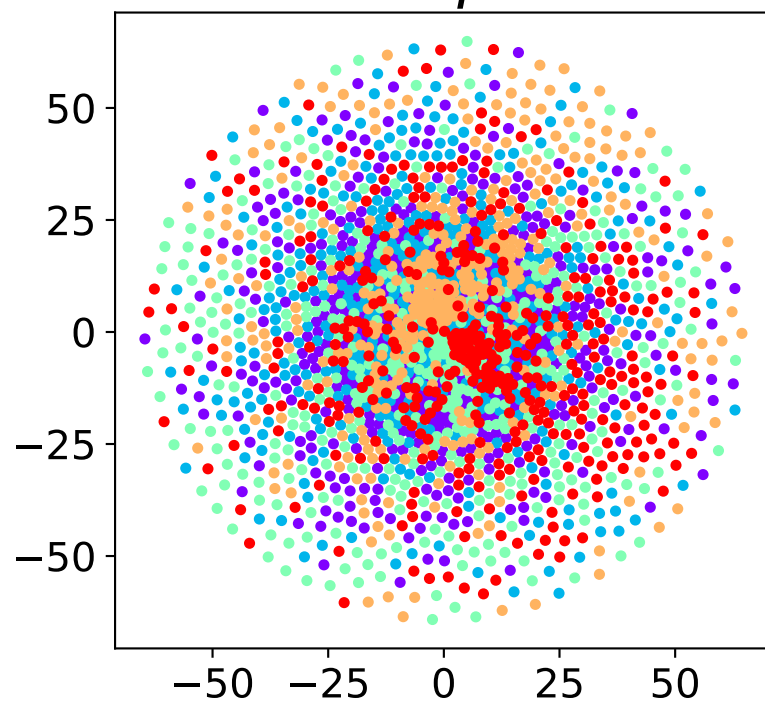 $D_{NB}$ 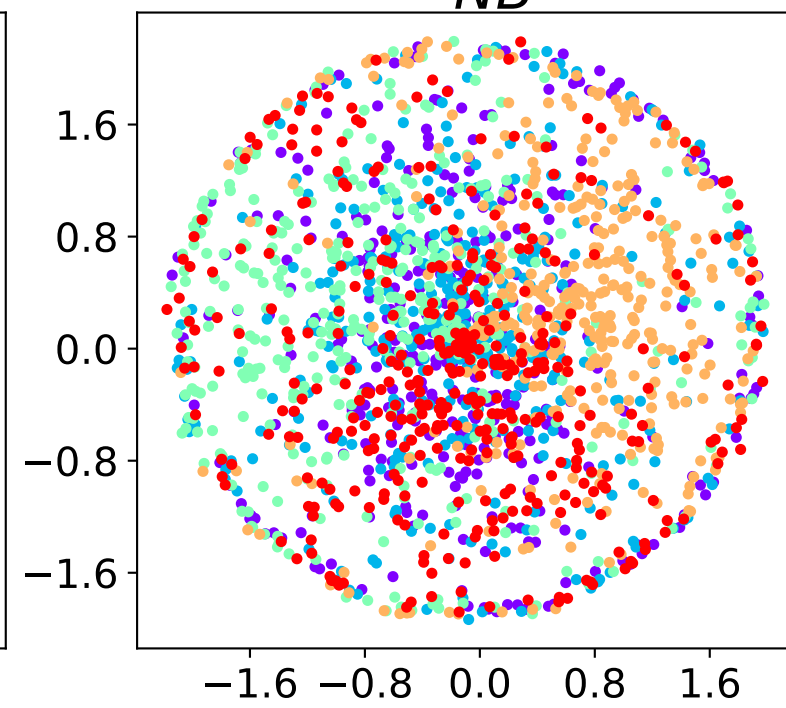

Supplement: supplementary_material [file attachment]

$D_E$ 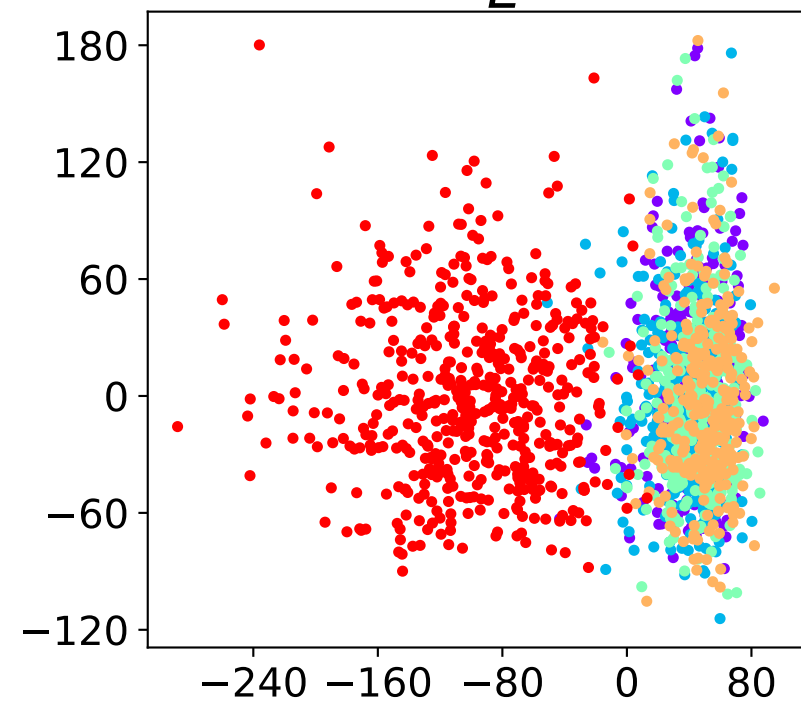 $D_r$ 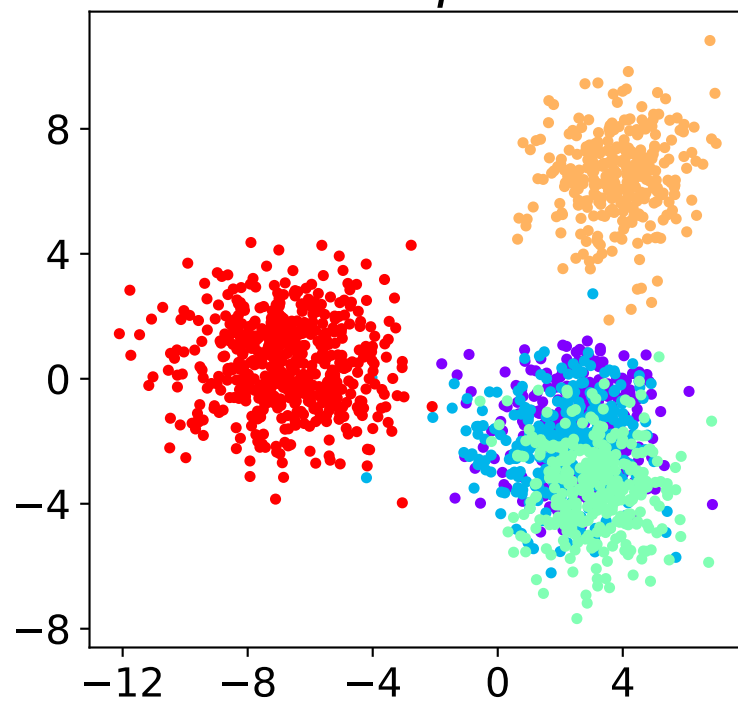 $D_{\text{asin}}$ 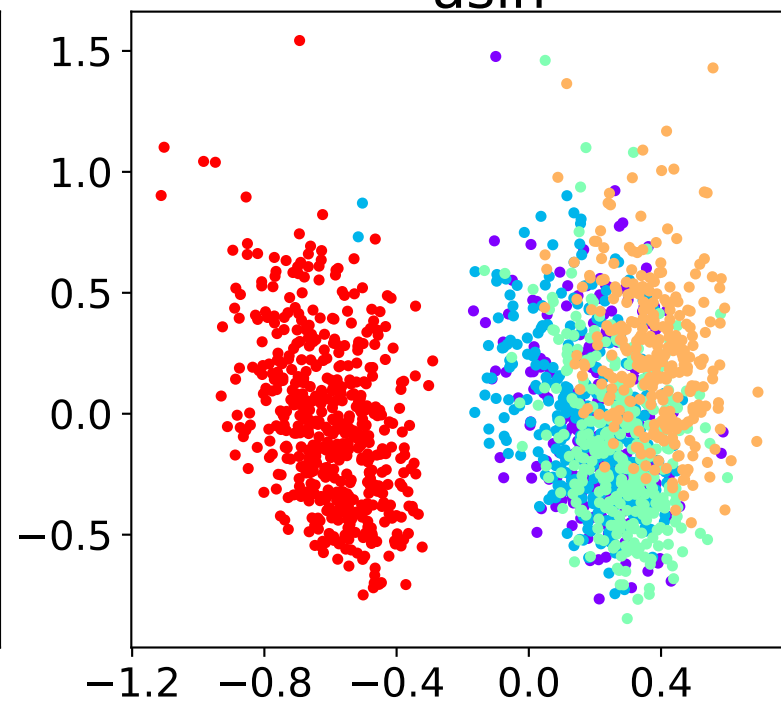 $D_{\text{log}}$ 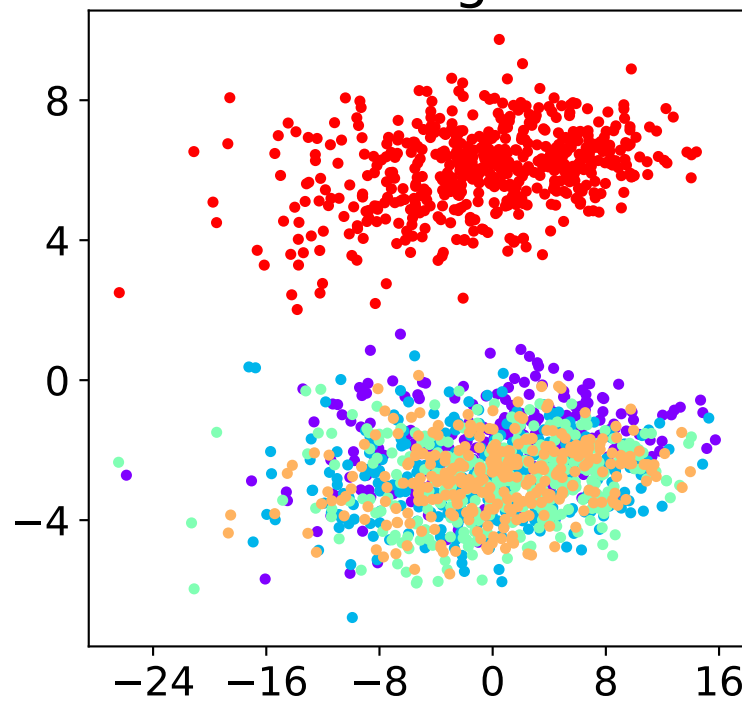 $D_P$ 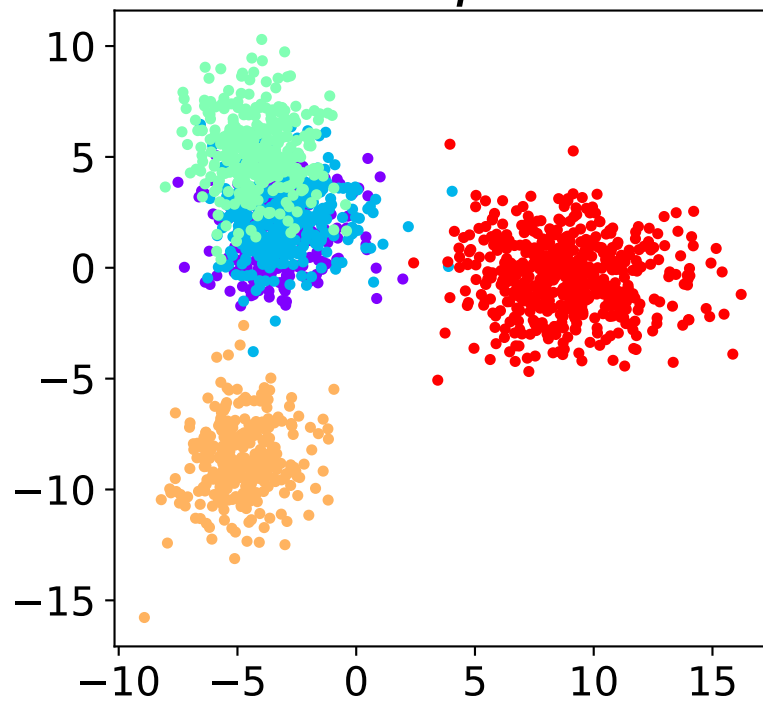 $D_{NB}$ 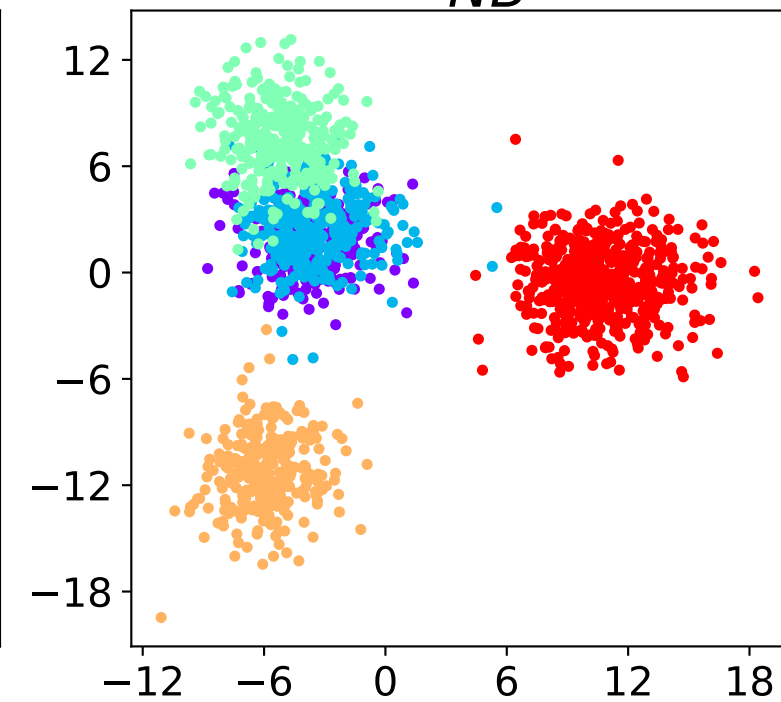

Supplement: supplementary_material [file attachment]

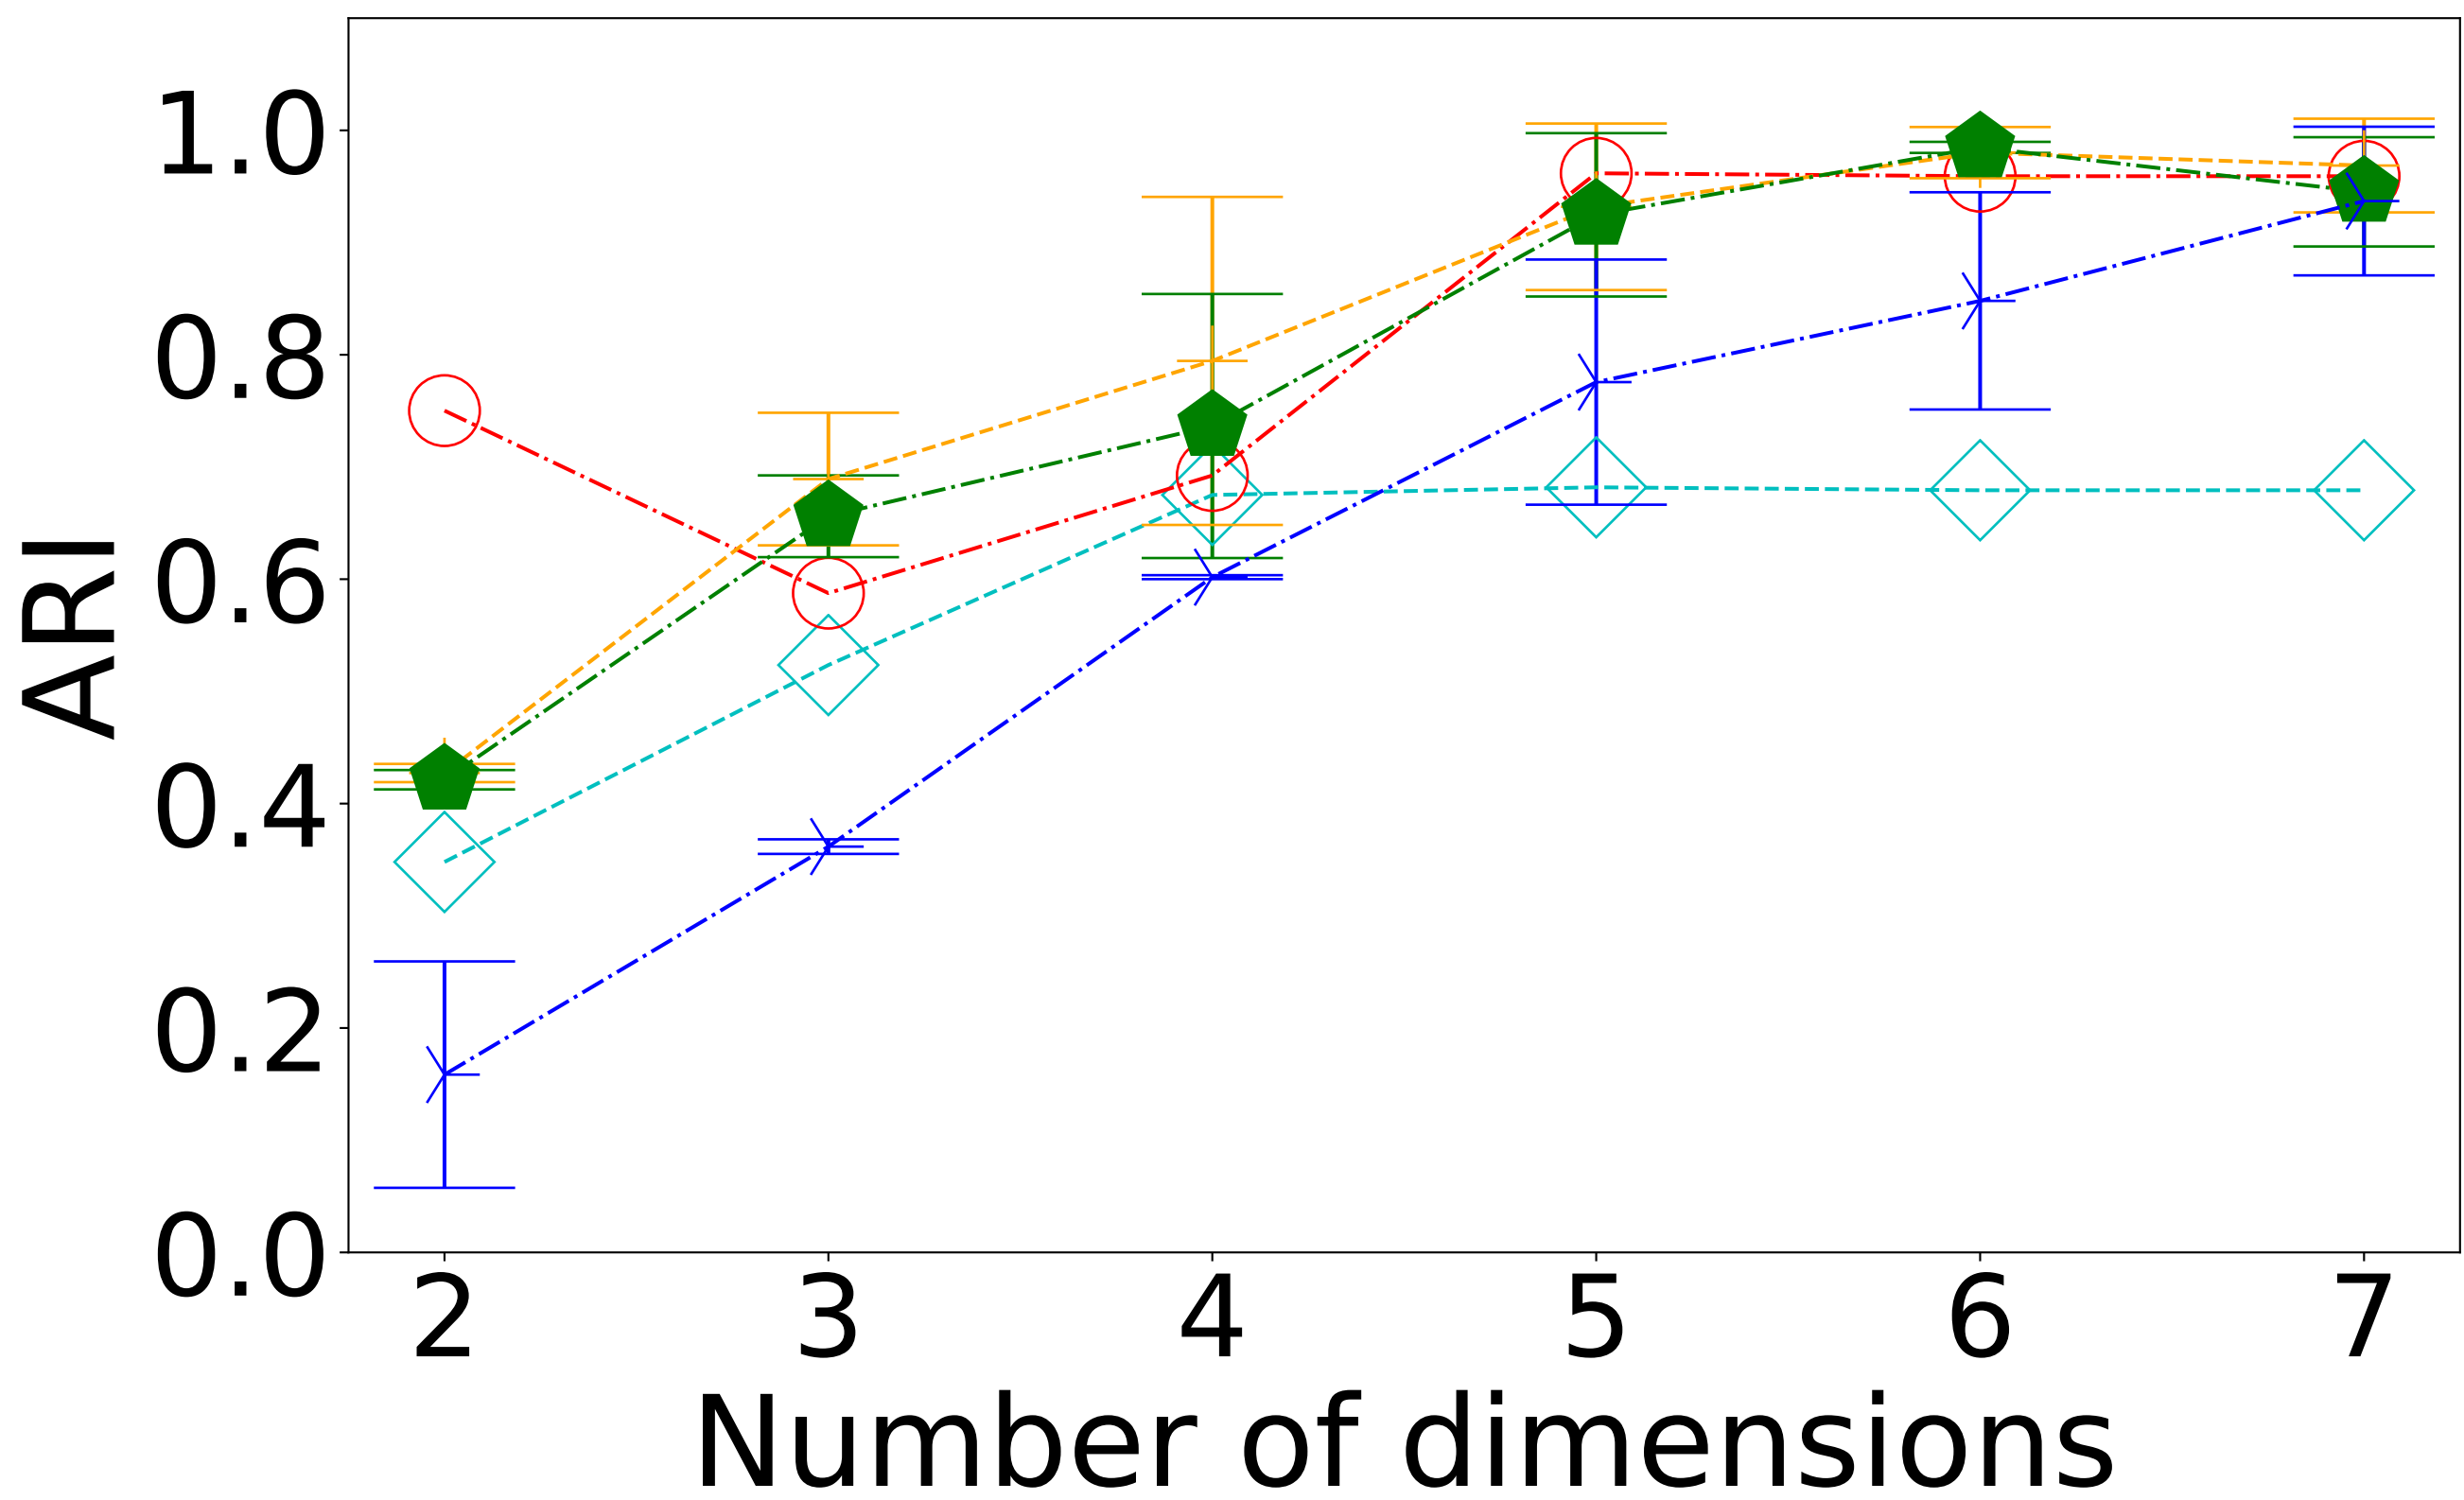

Supplement: supplementary_material [file attachment]

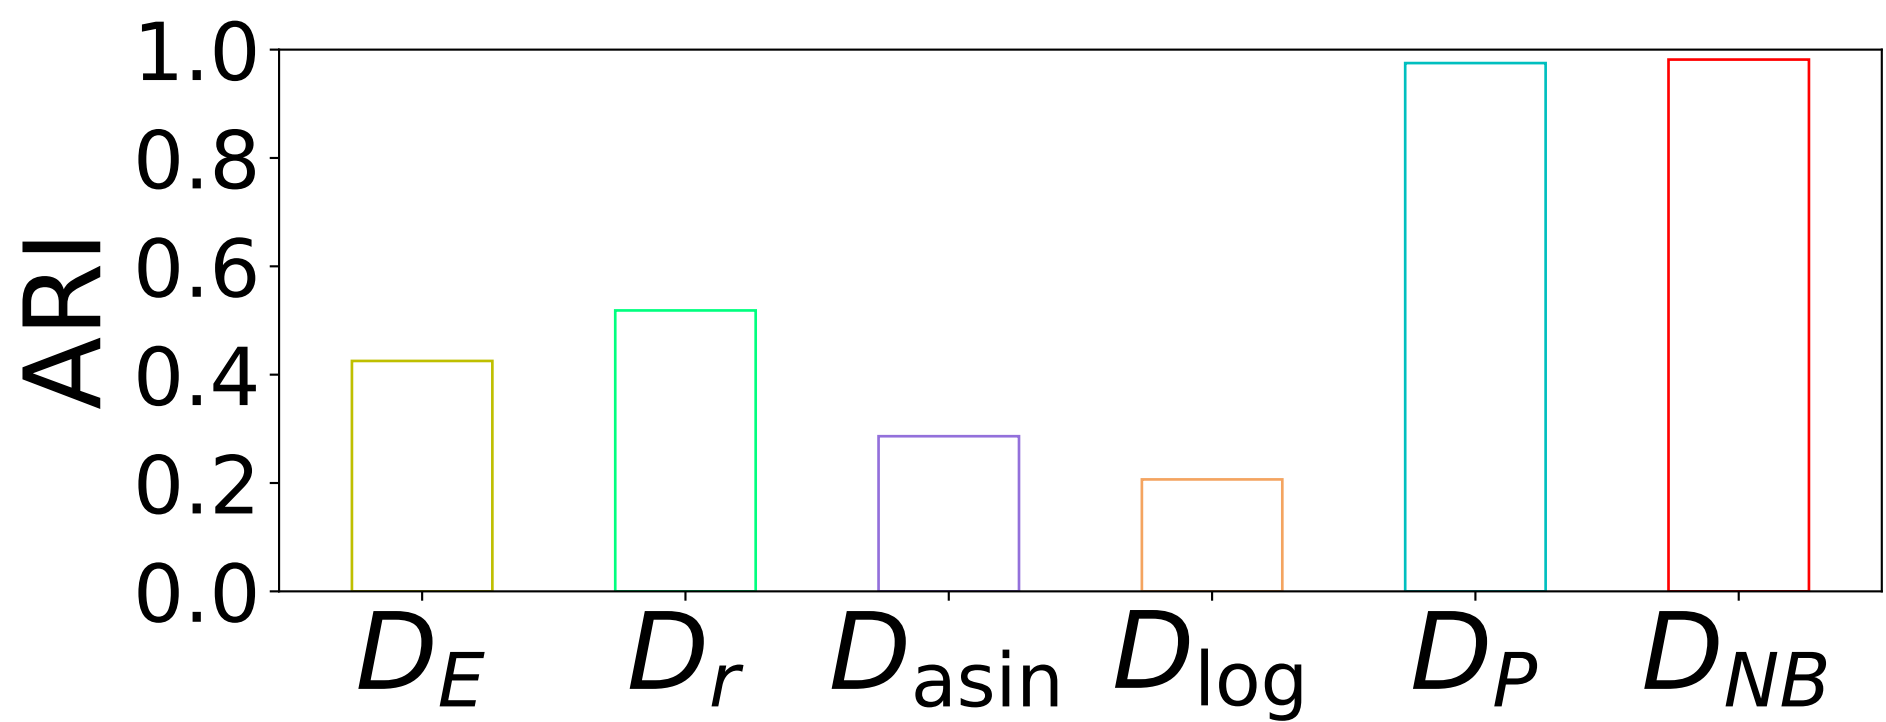

Supplement: supplementary_material [file attachment]

$D_E$ 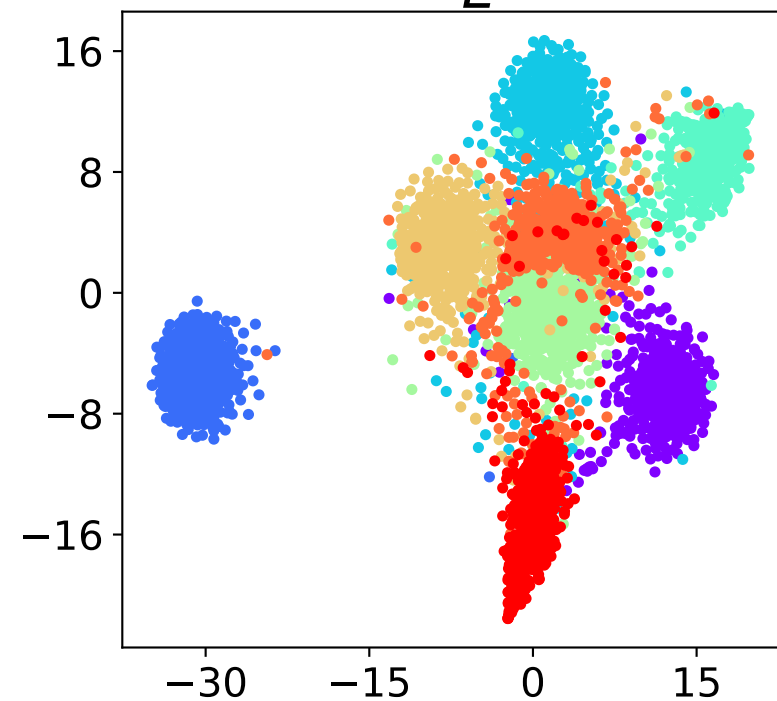 $D_r$ 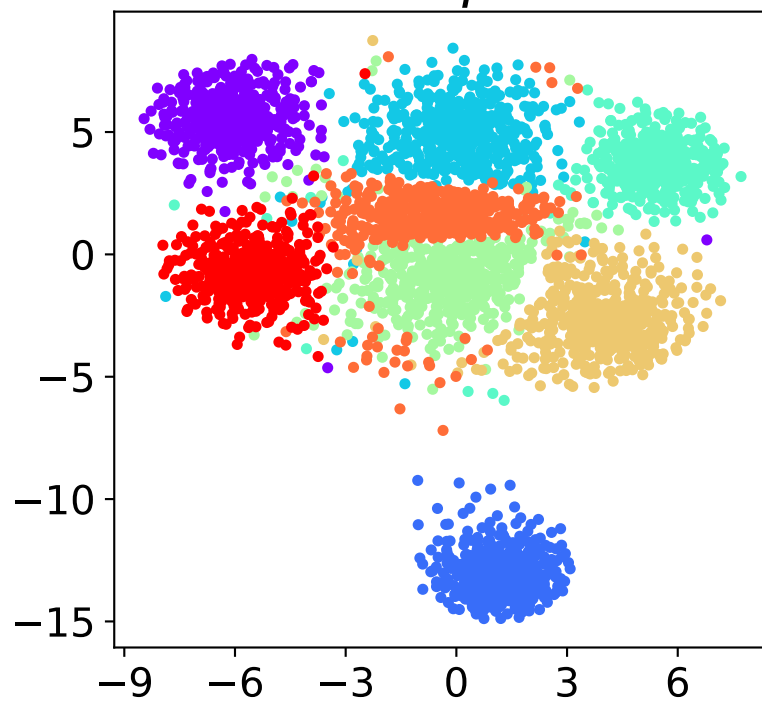 $D_{asin}$ 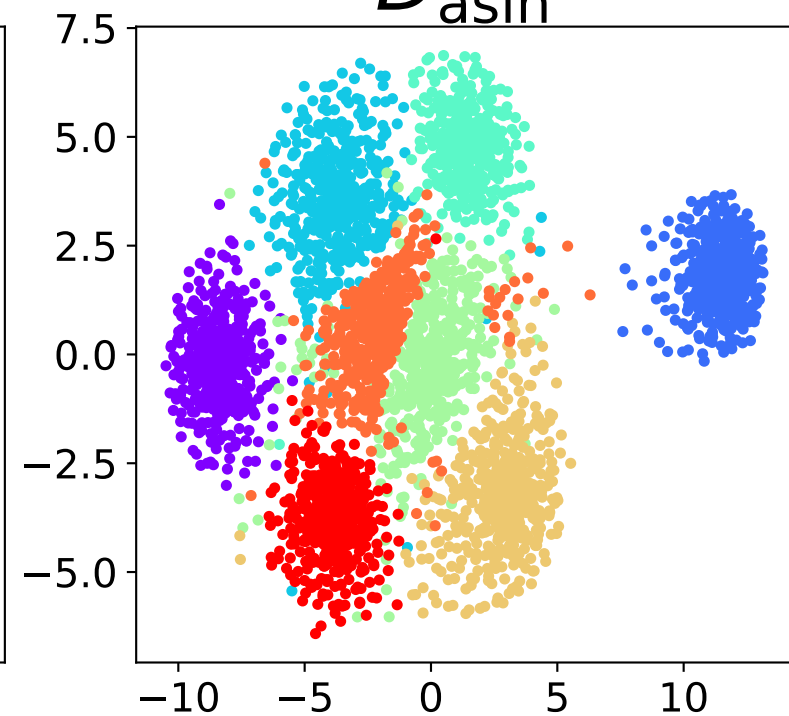 $D_{log}$ 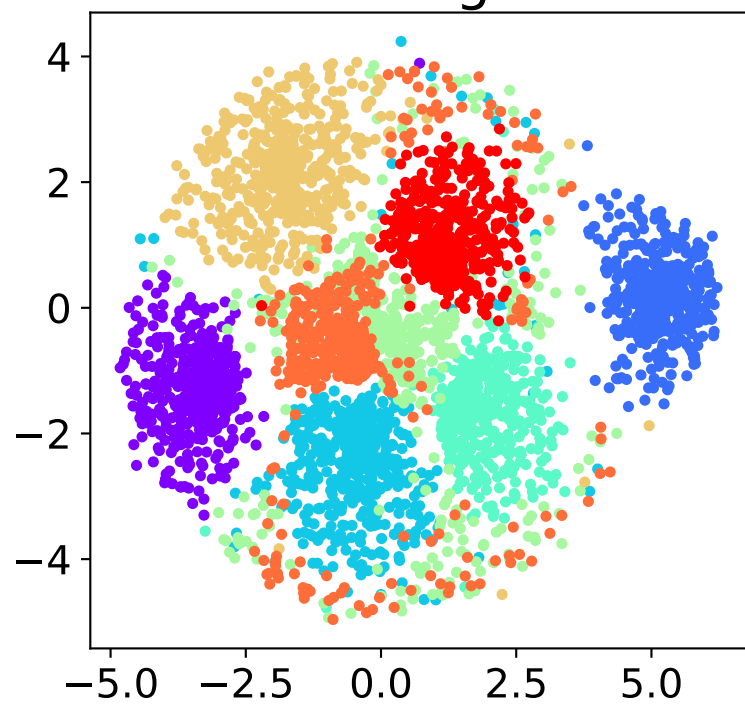 $D_P$ 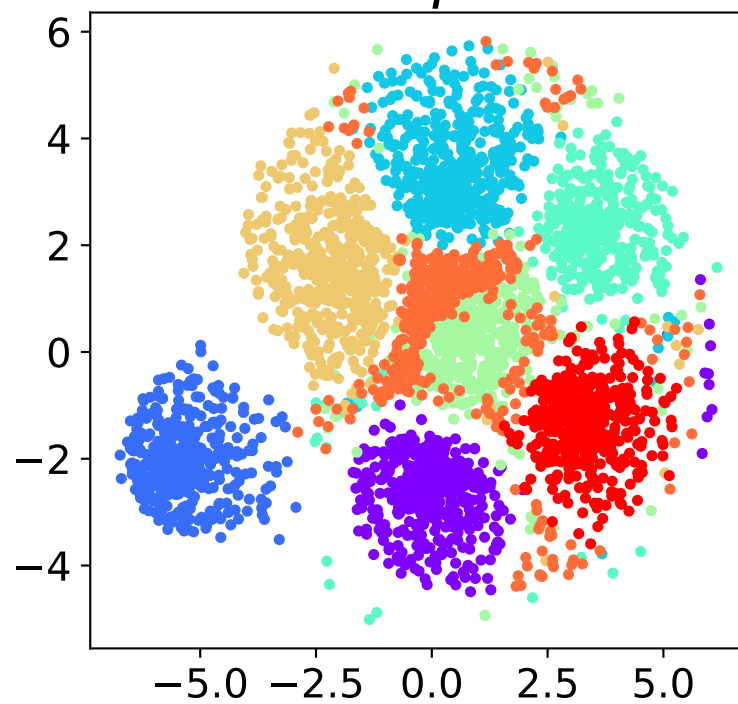 $D_{NB}$ 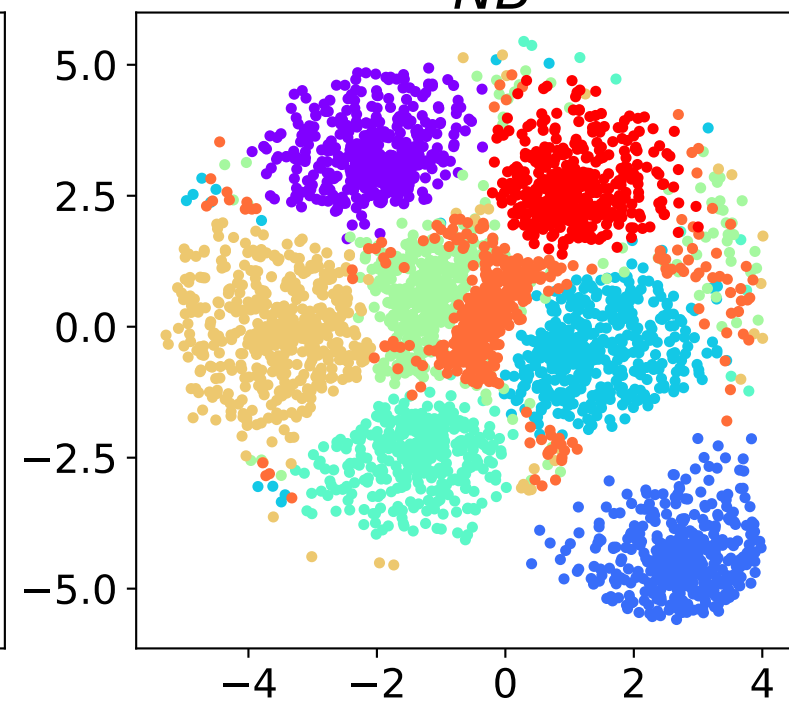

Supplement: supplementary_material [file attachment]

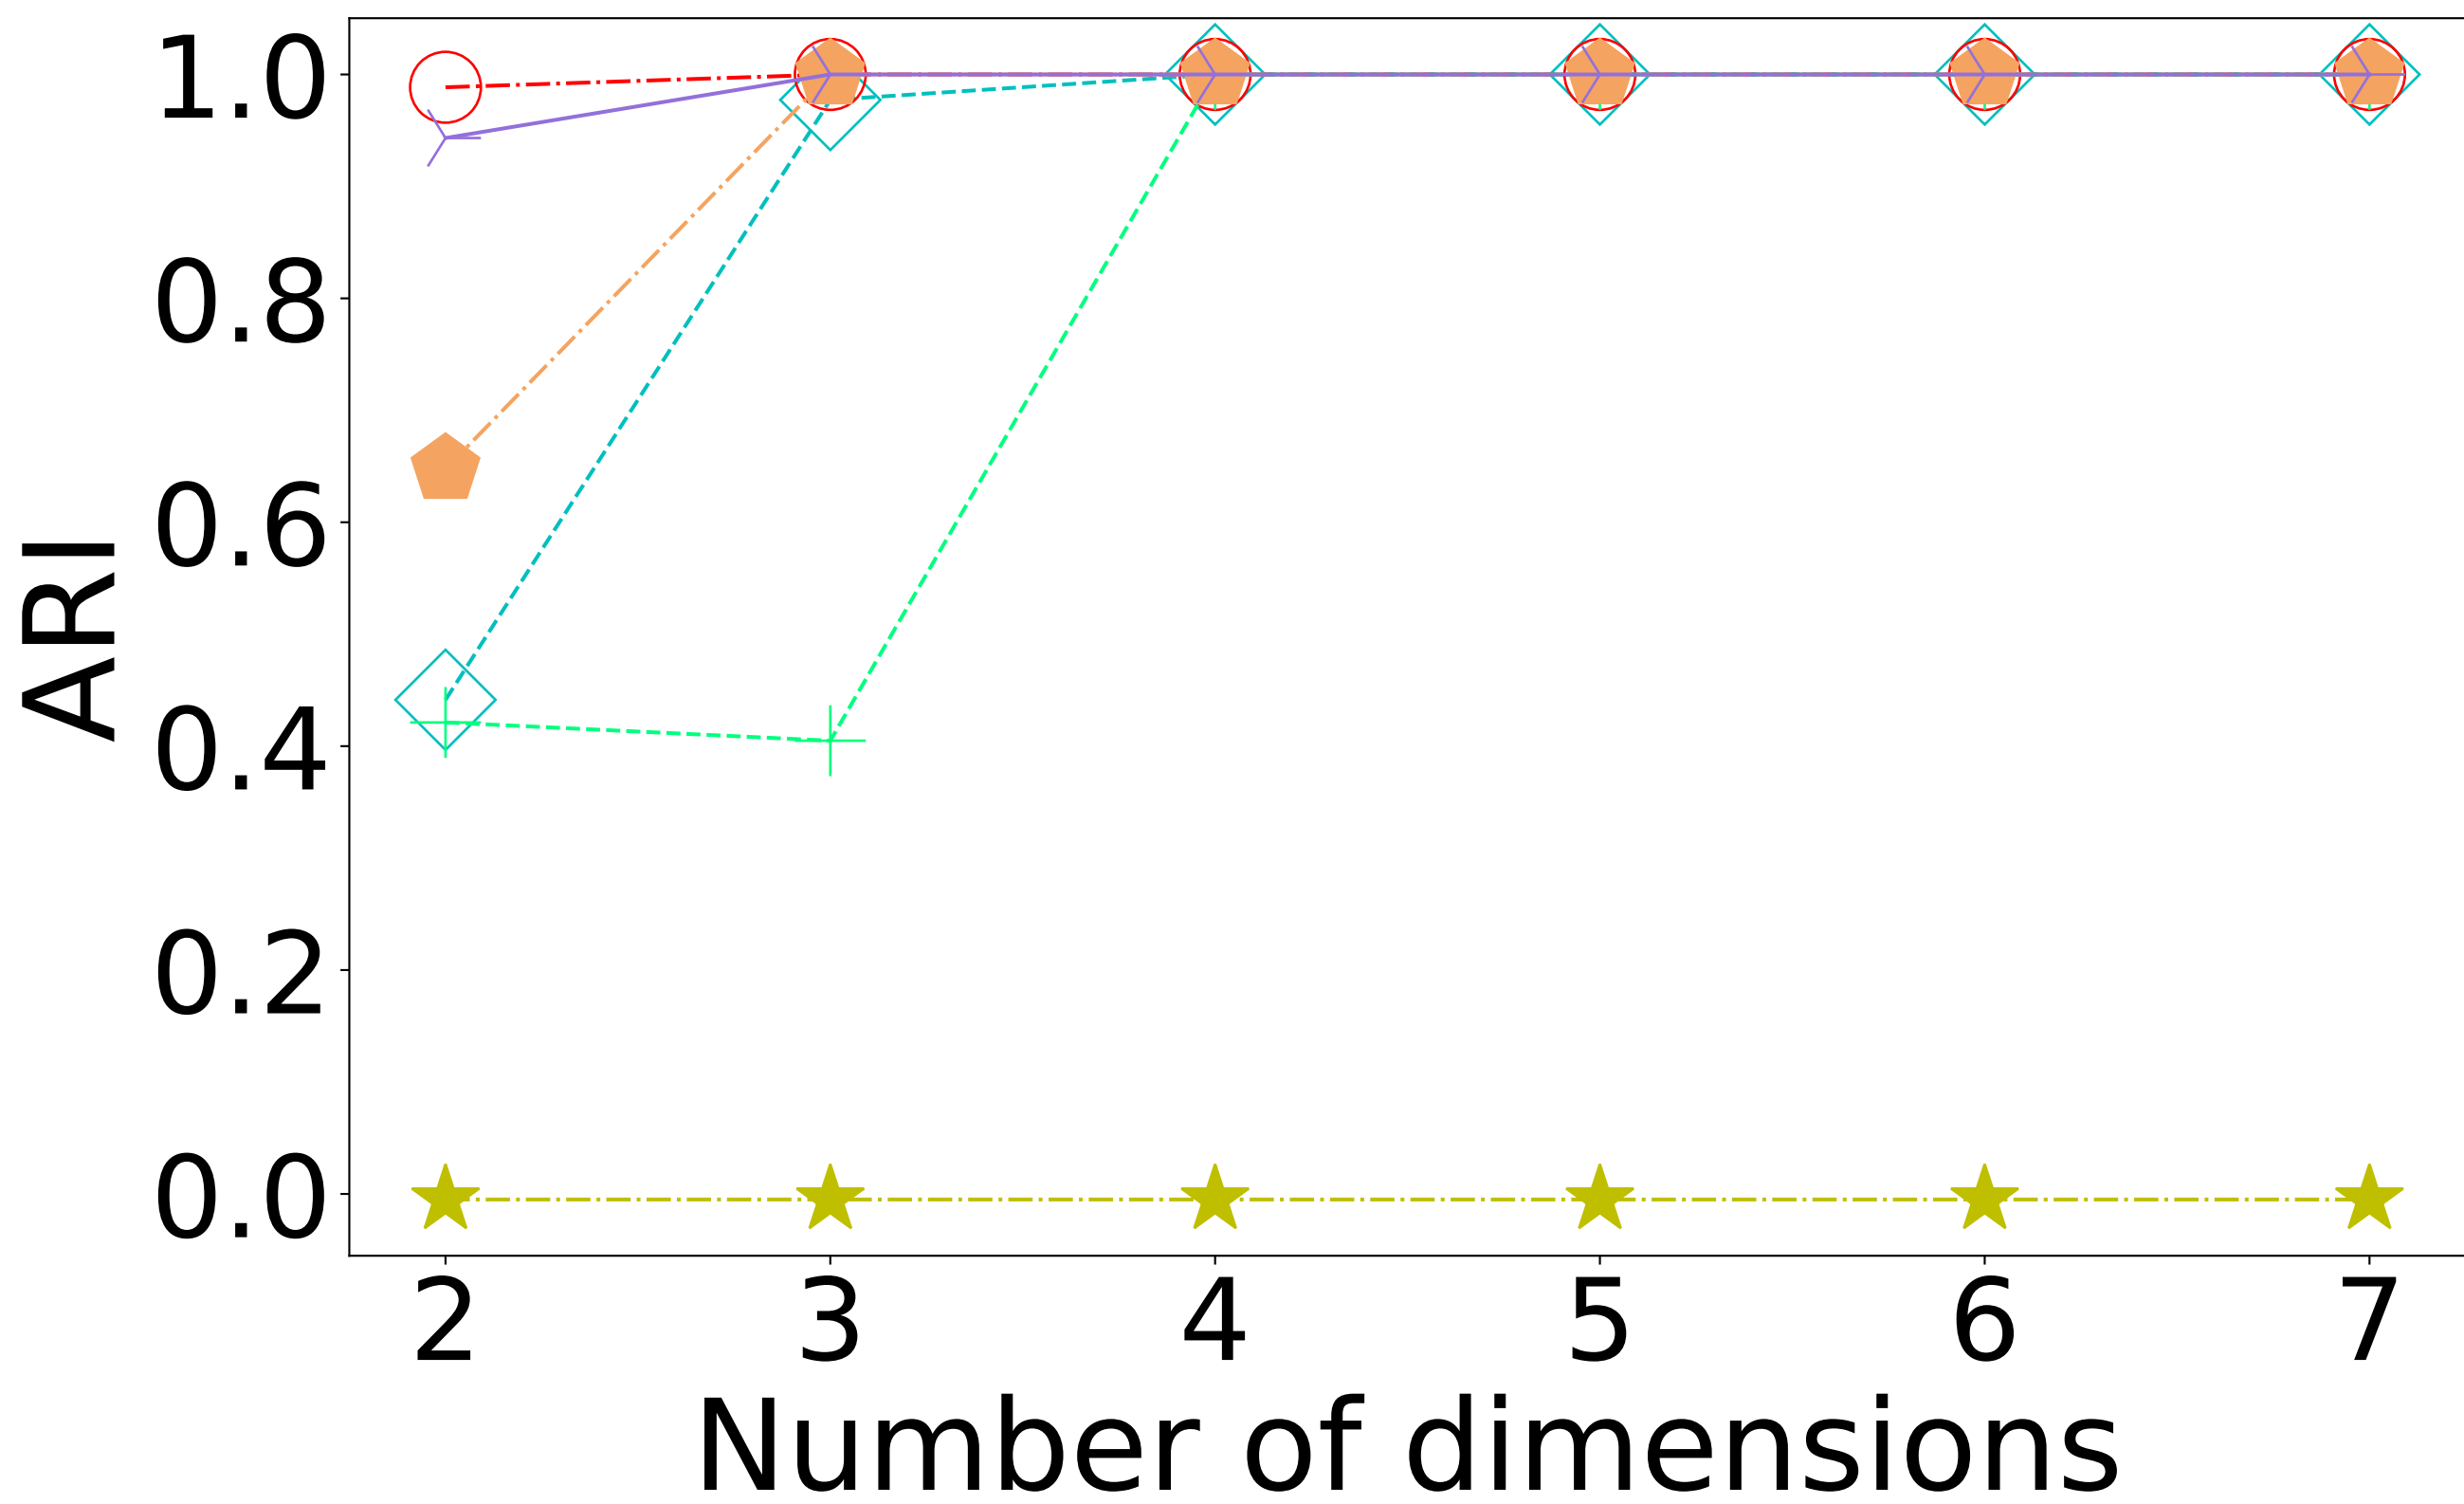

Supplement: supplementary_material [file attachment]

$D_E$ 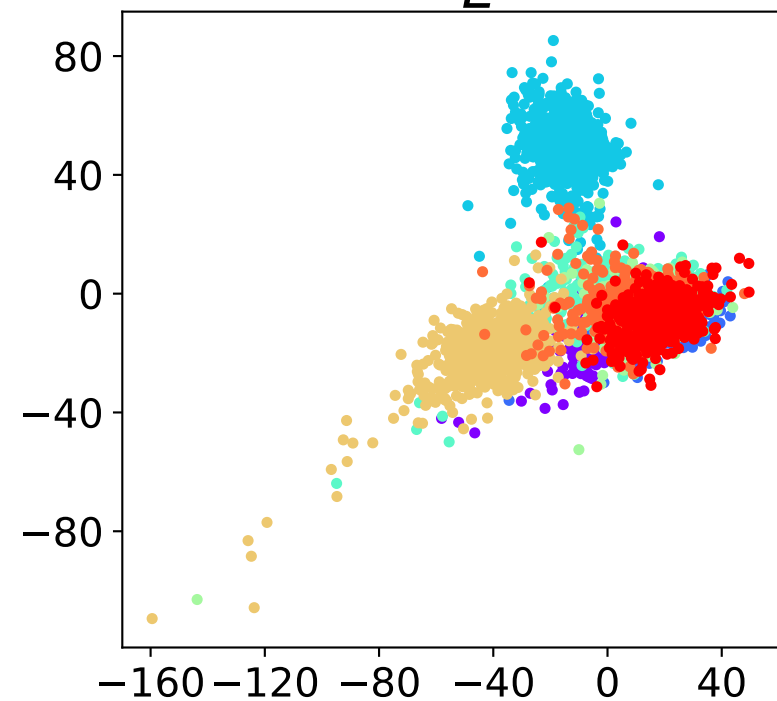 $D_r$ 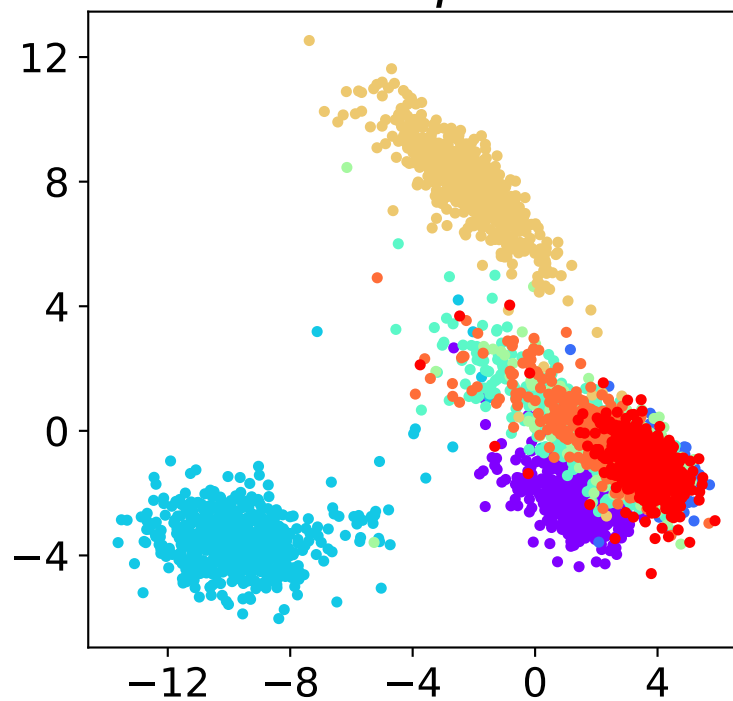 $D_{\text{asin}}$ 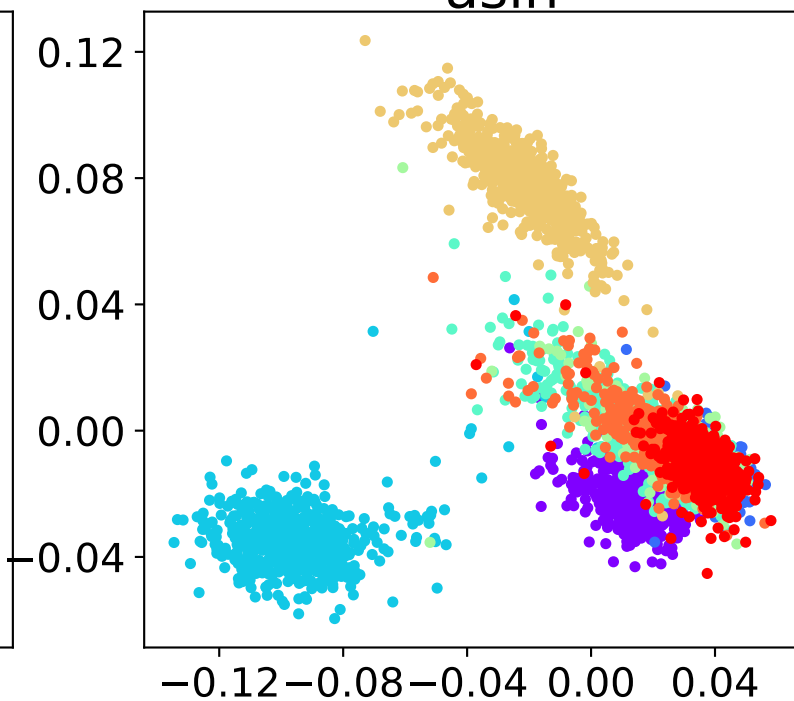 $D_{\log}$ 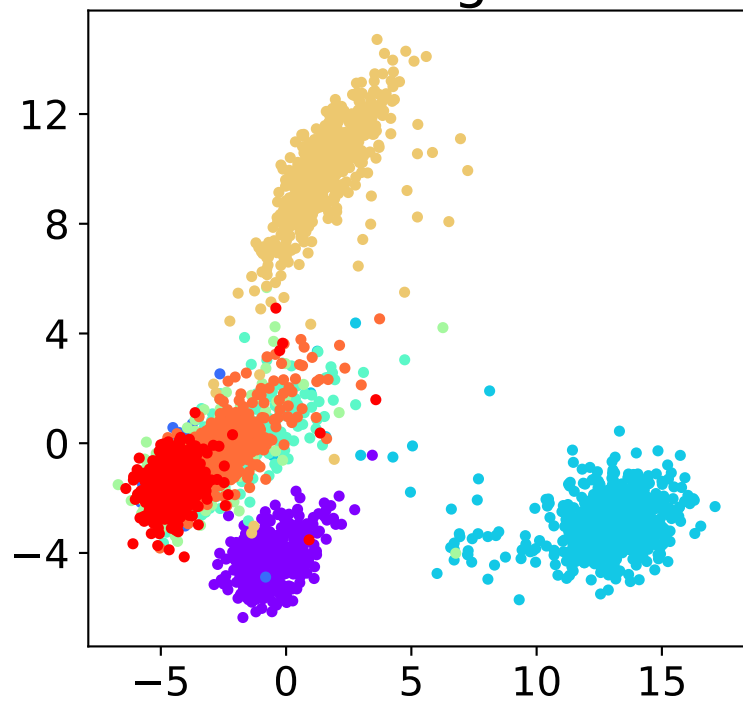 $D_P$ 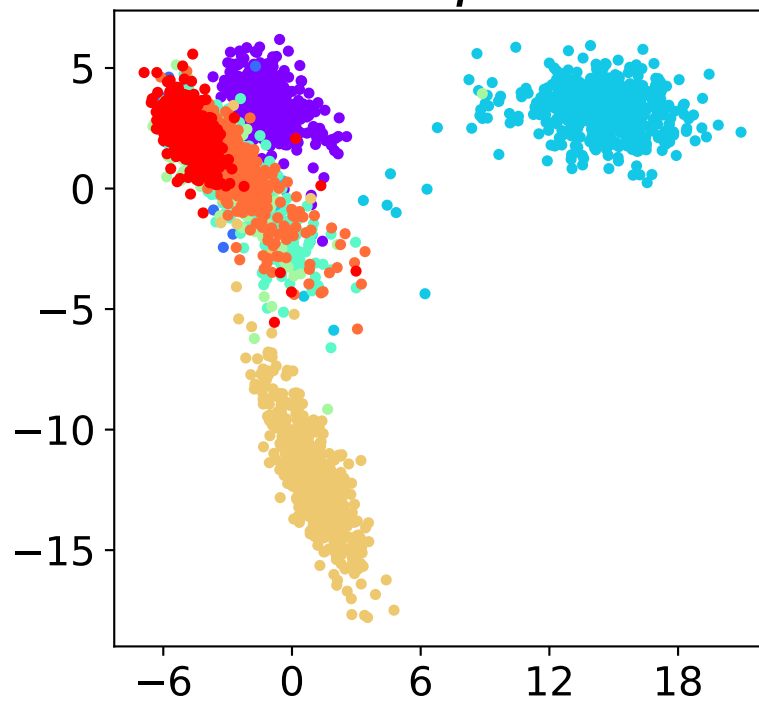 $D_{NB}$ 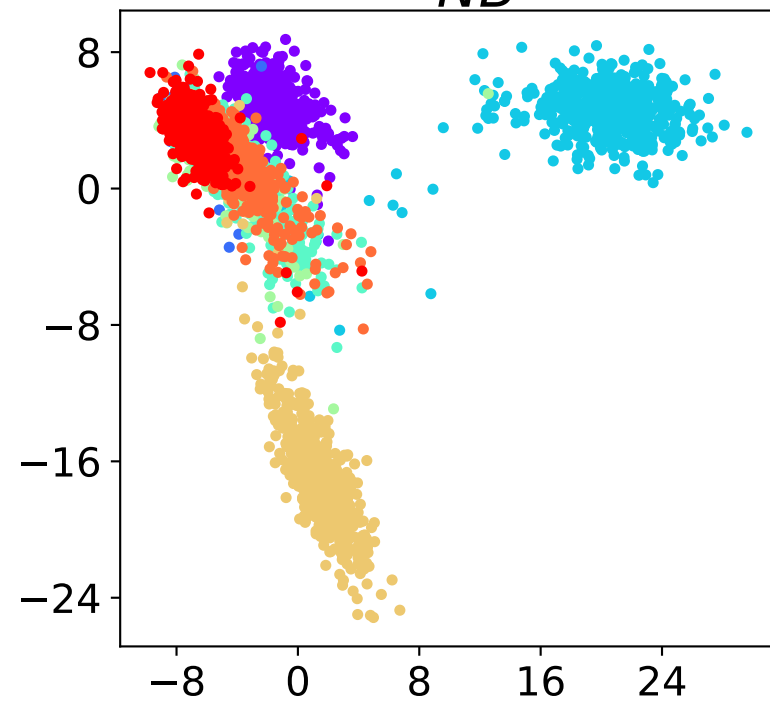

Supplement: supplementary_material [file attachment]

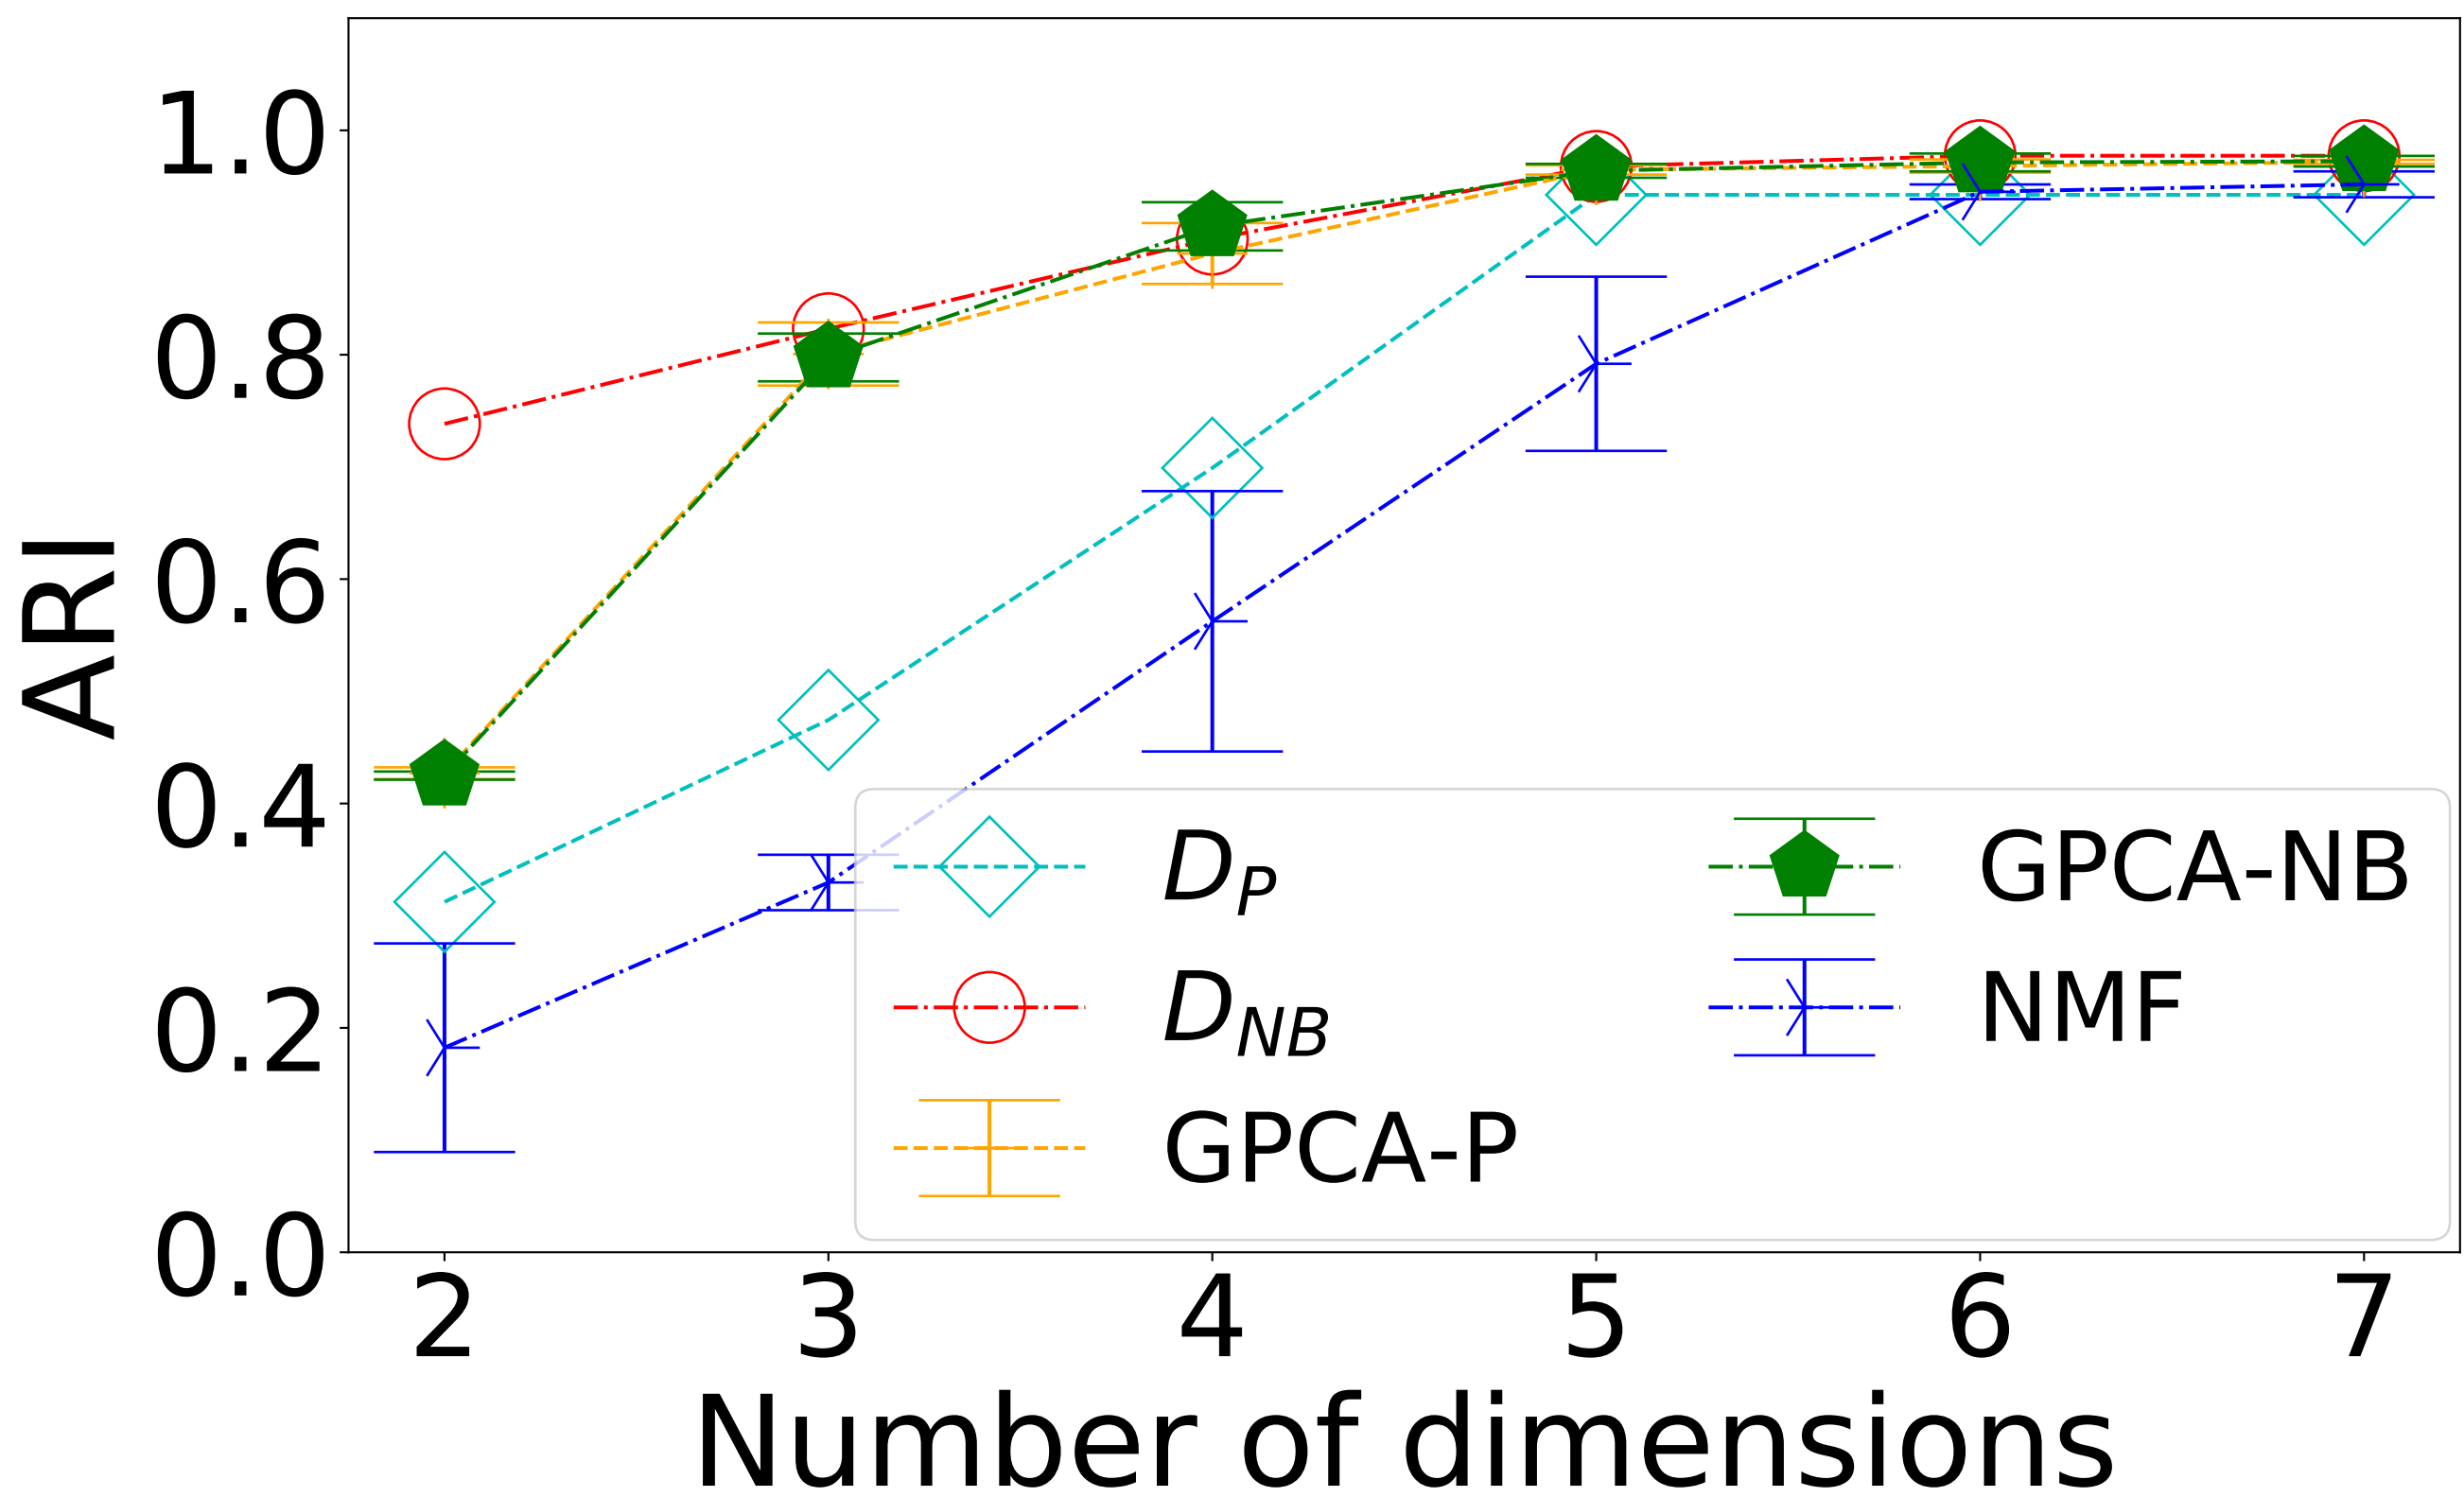

Supplement: supplementary_material [file attachment]

$D_E$ 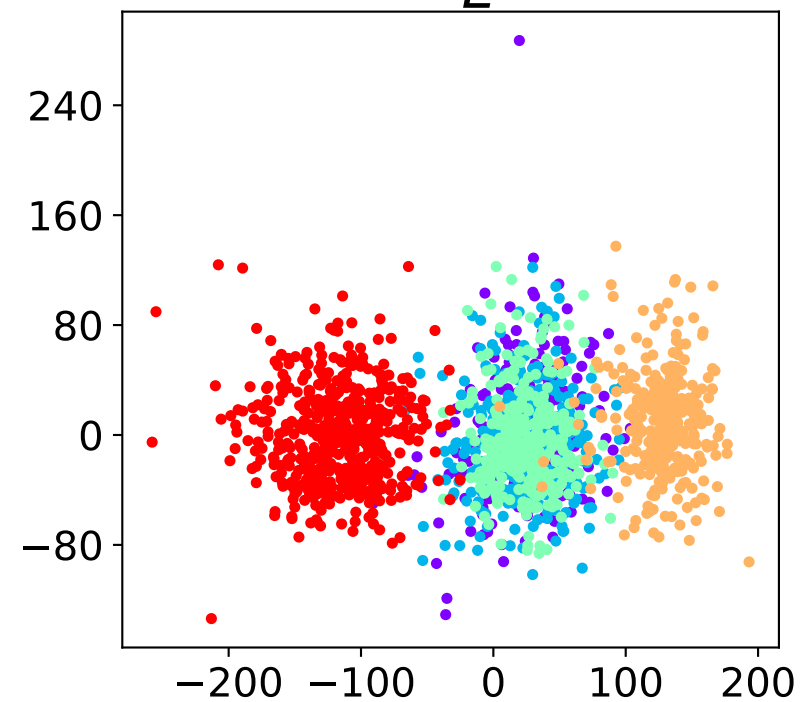 $D_r$ 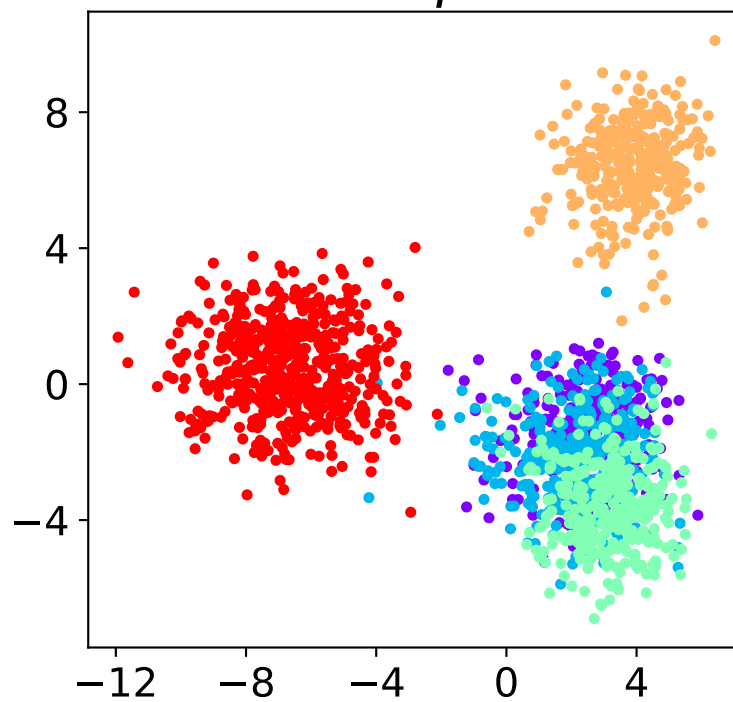 $D_{\text{asin}}$ 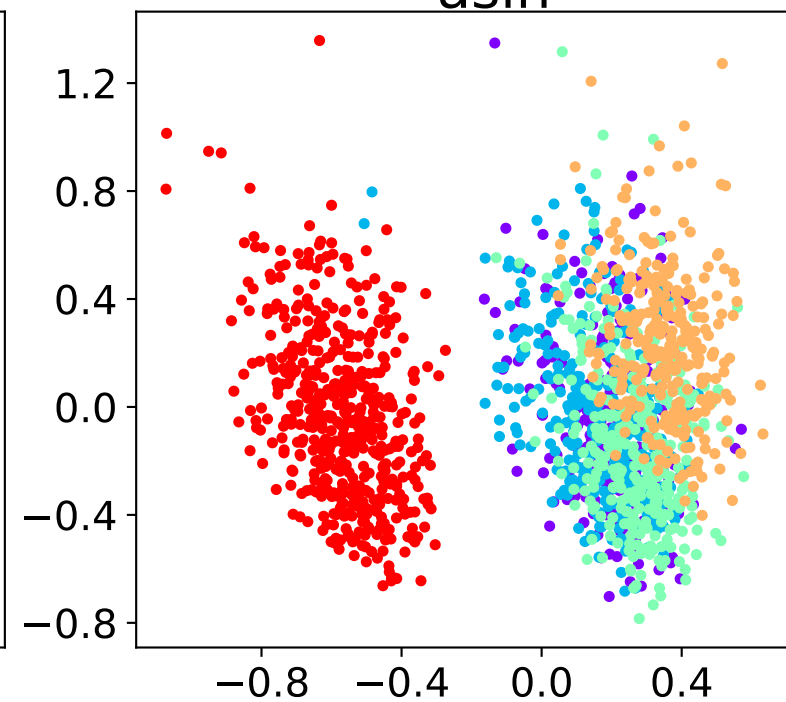 $D_{\log}$ 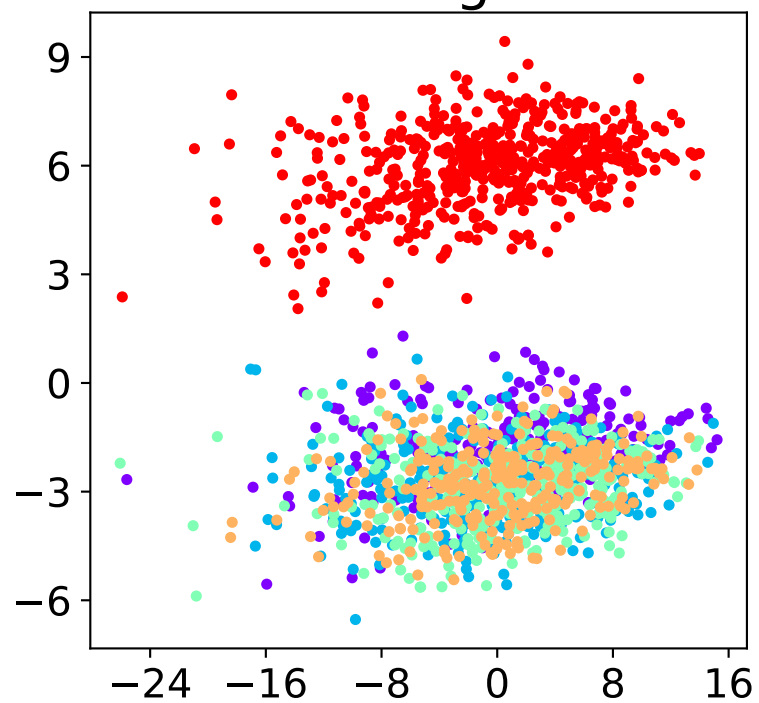 $D_P$ 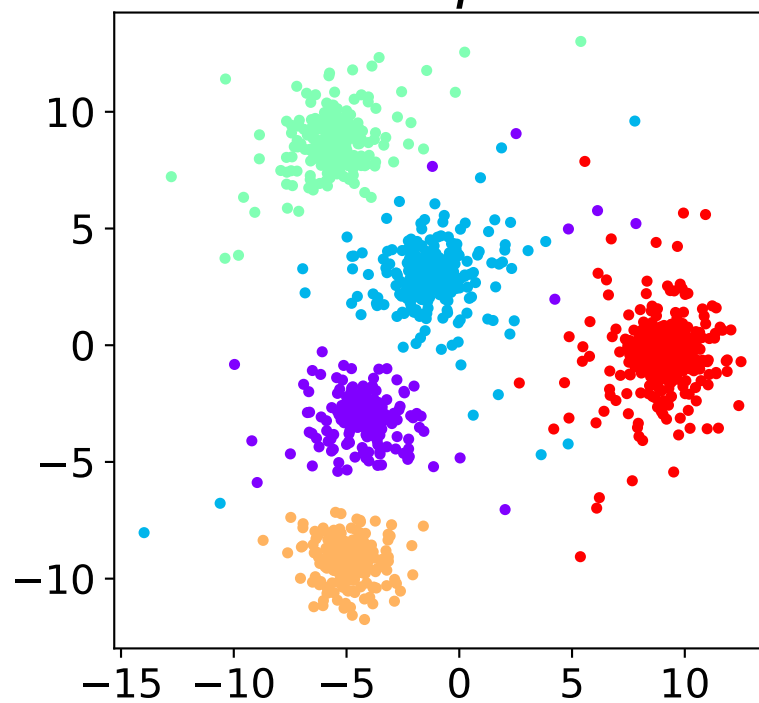 $D_{NB}$ 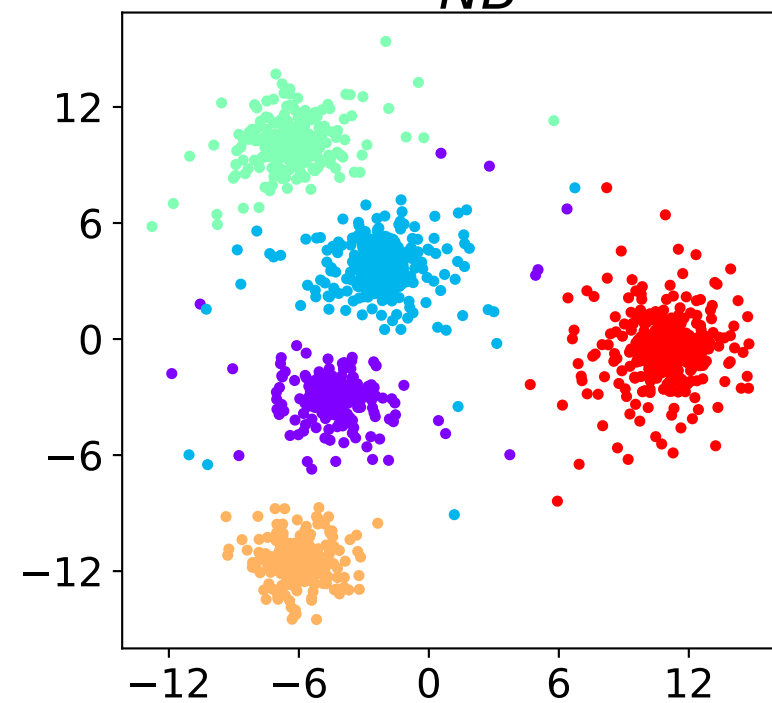

Supplement: supplementary_material [file attachment]

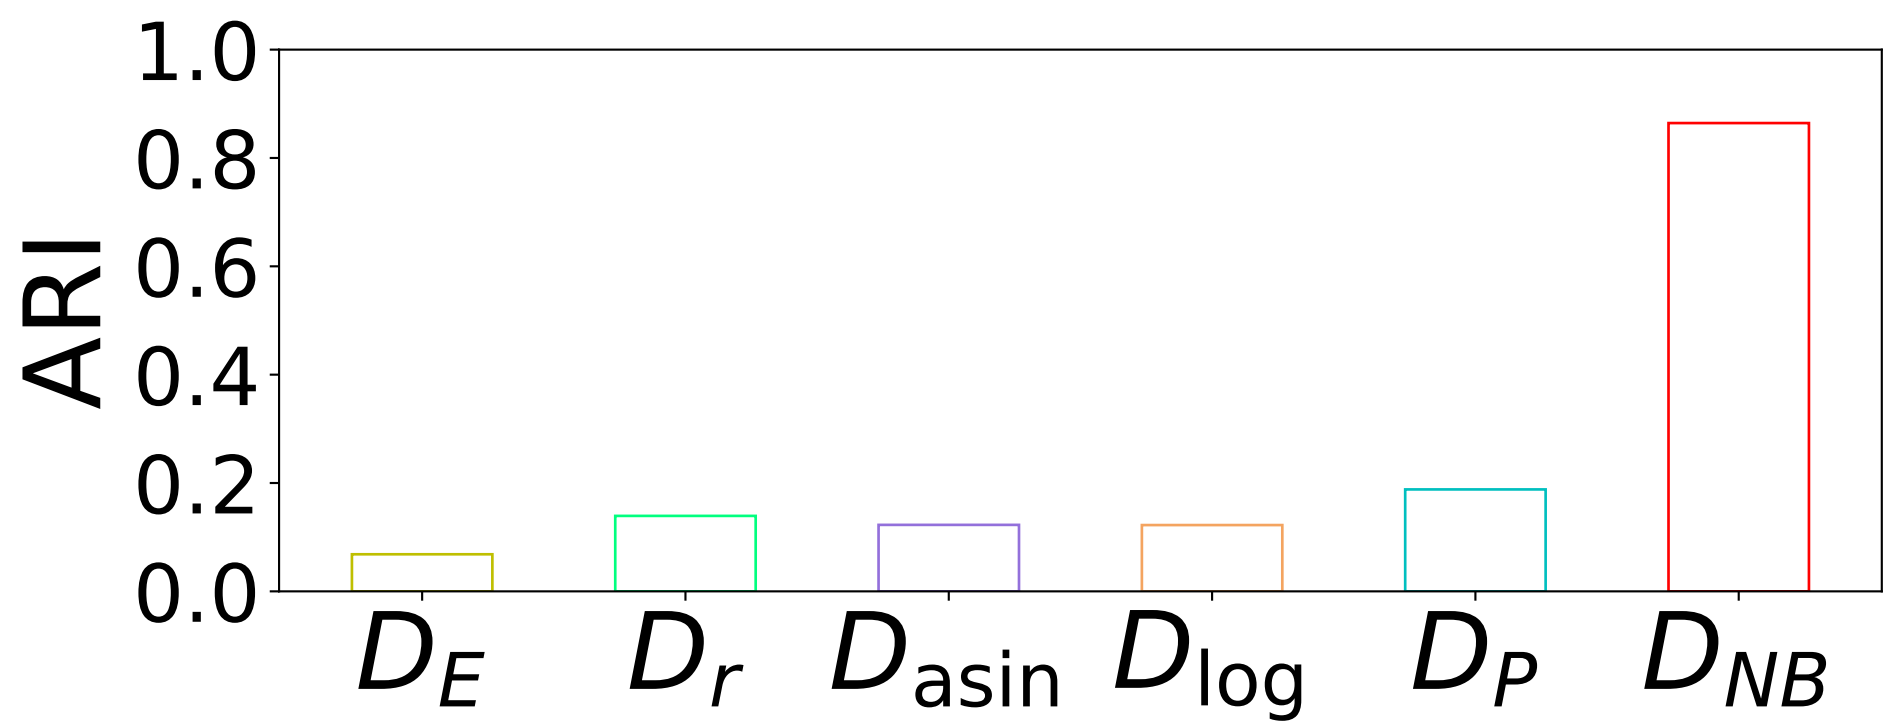

Supplement: supplementary_material [file attachment]

$D_E$ 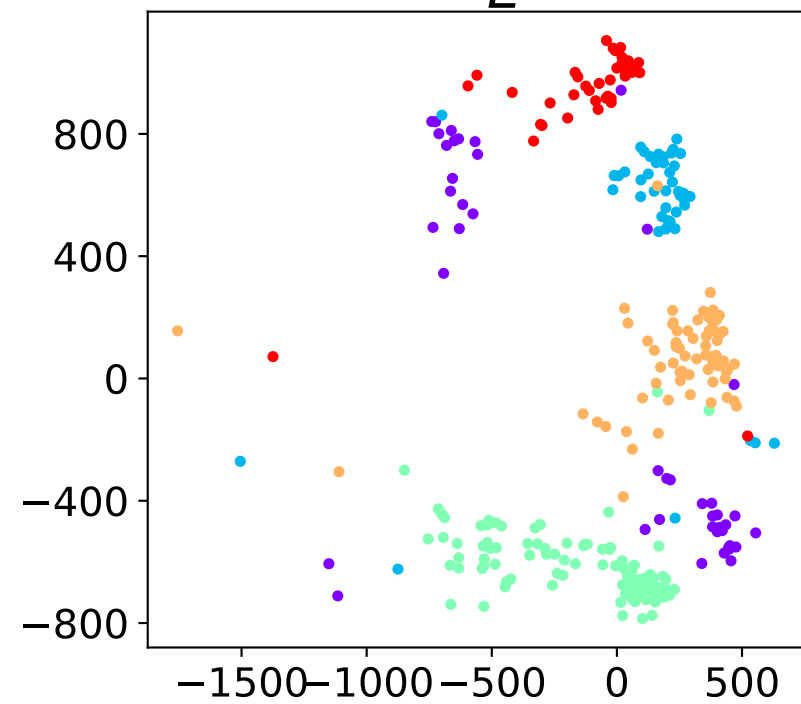 $D_r$ 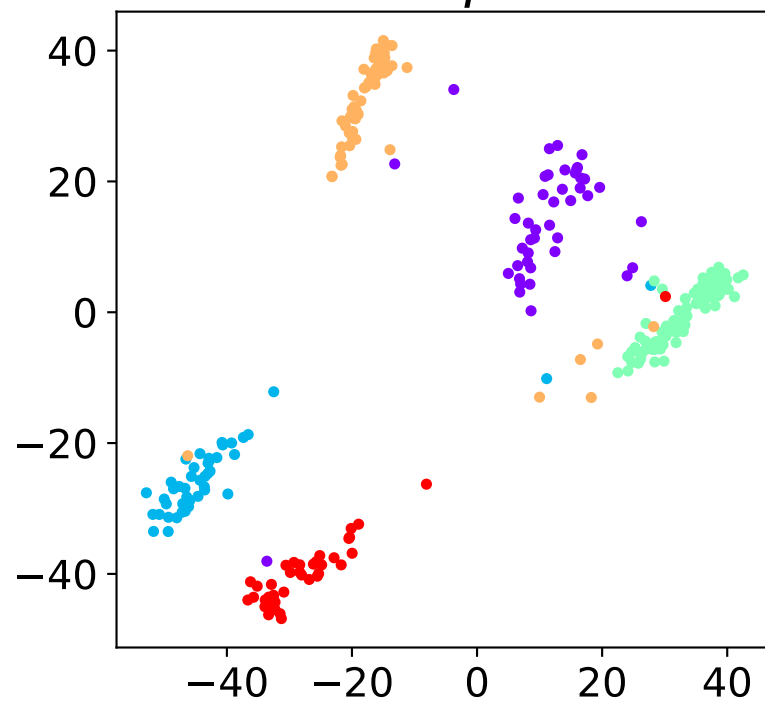 $D_{\text{asin}}$ 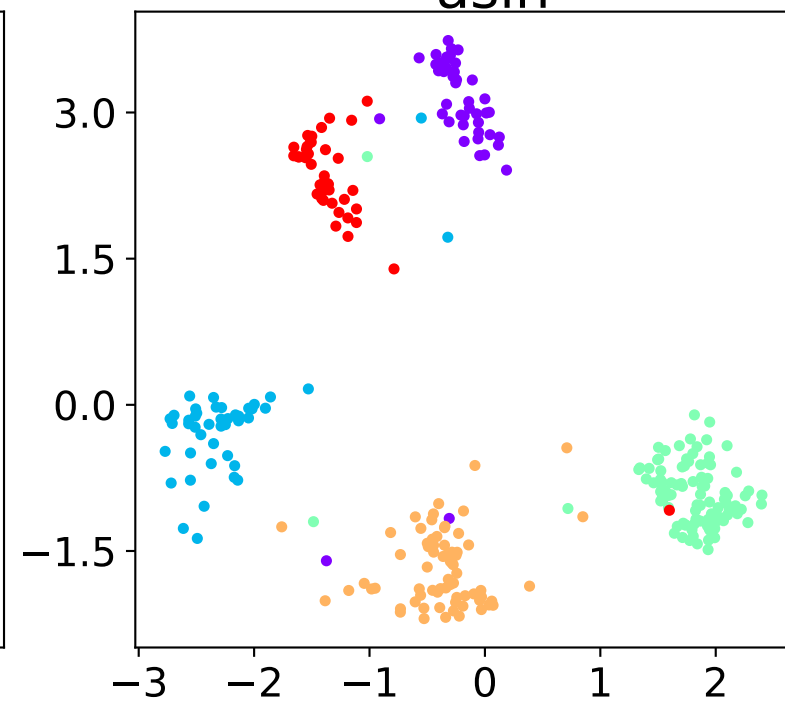 $D_{\text{log}}$ 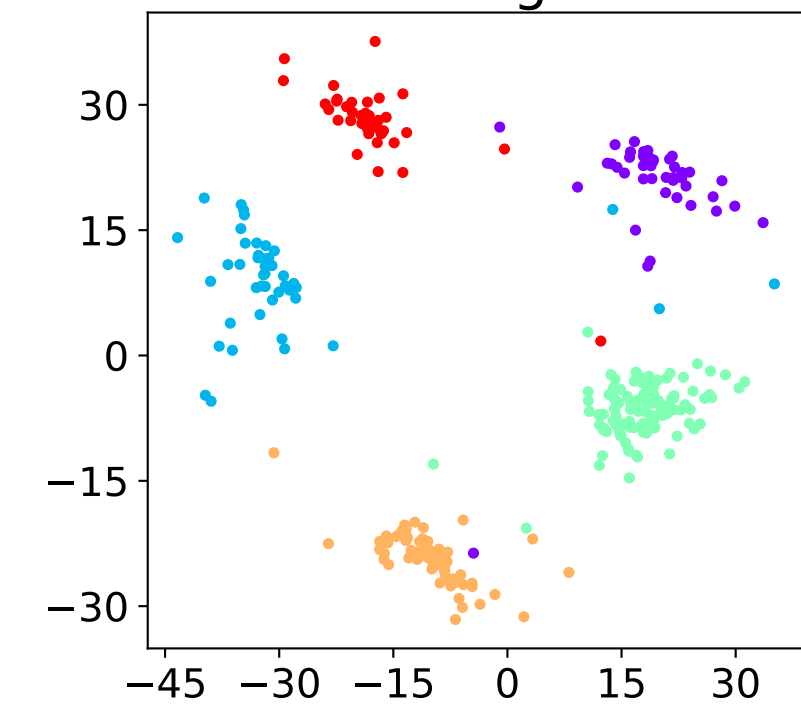 $D_P$ 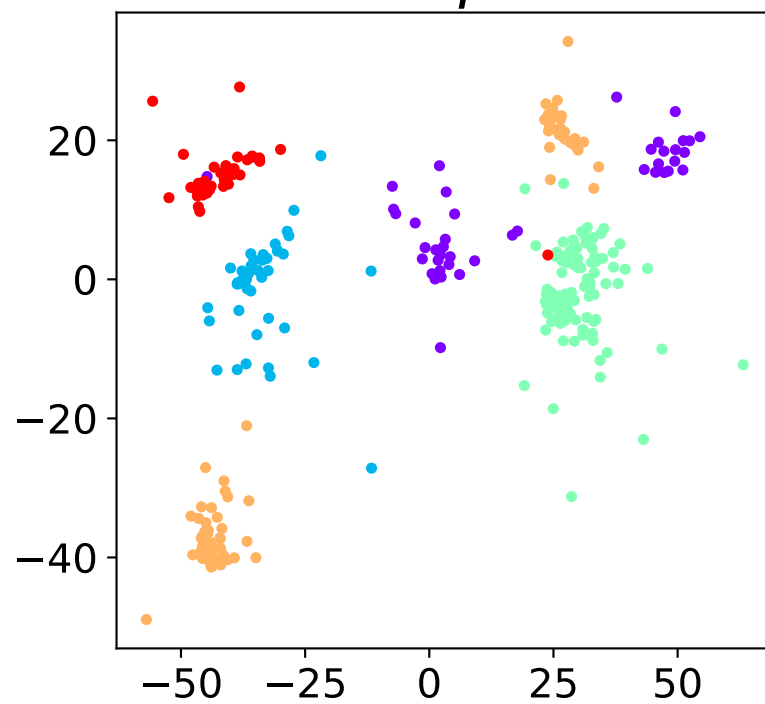 $D_{NB}$ 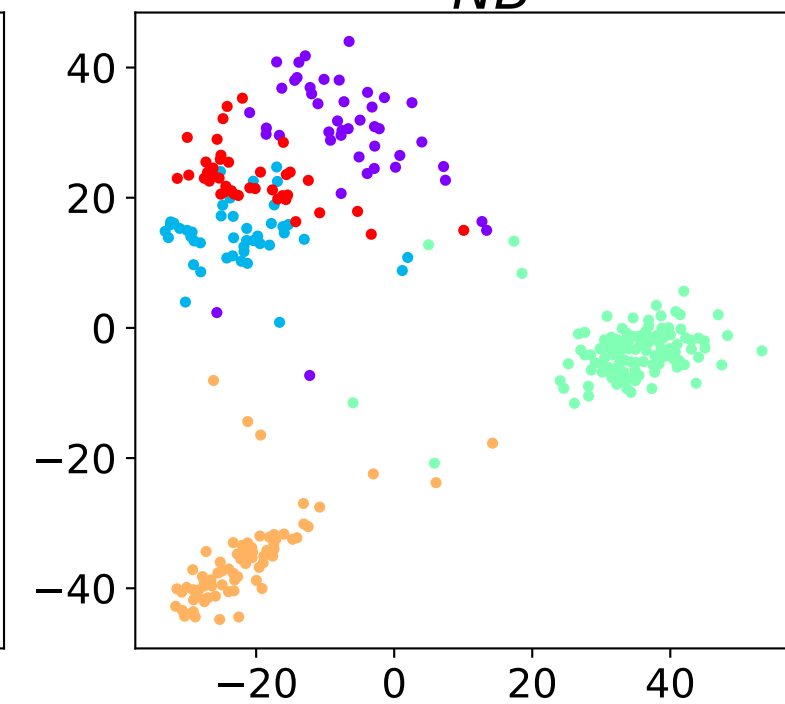

Supplement: supplementary_material [file attachment]

GPCA-P

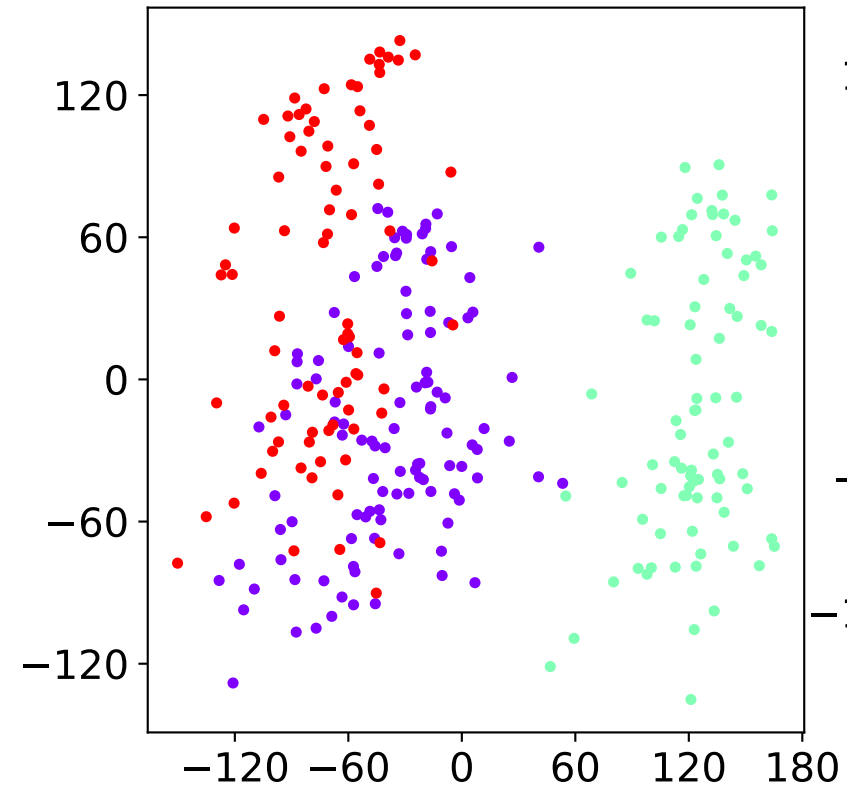

GPCA-NB

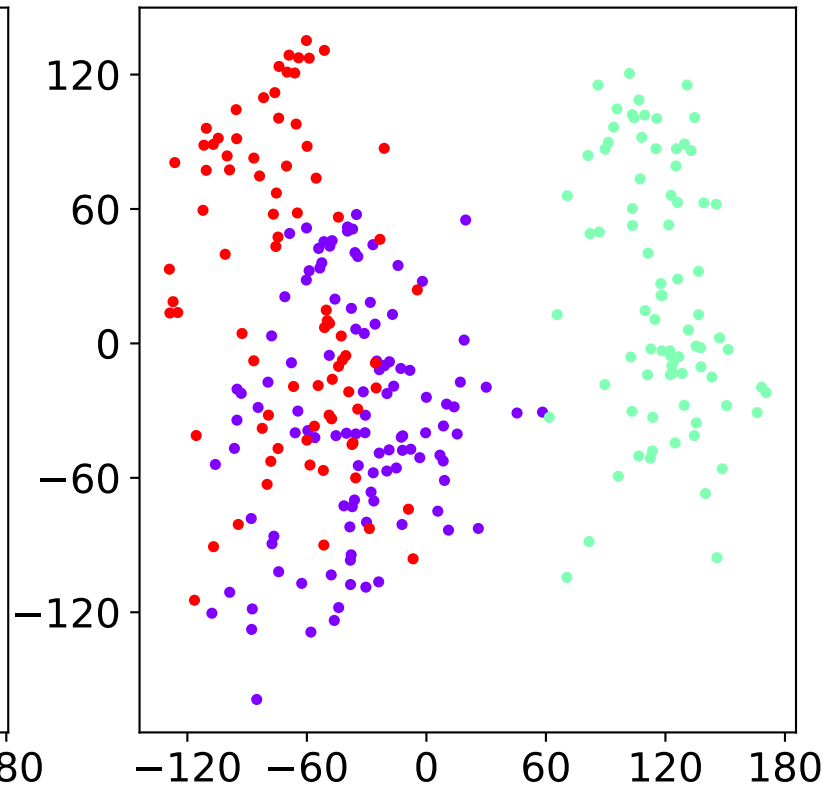

NMF

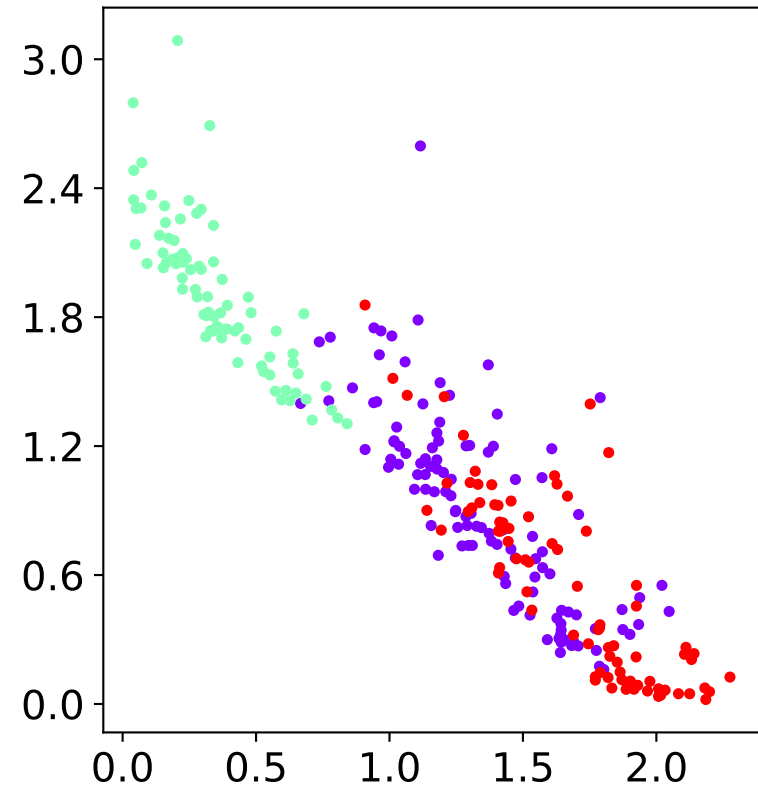

Supplement: supplementary_material [file attachment]

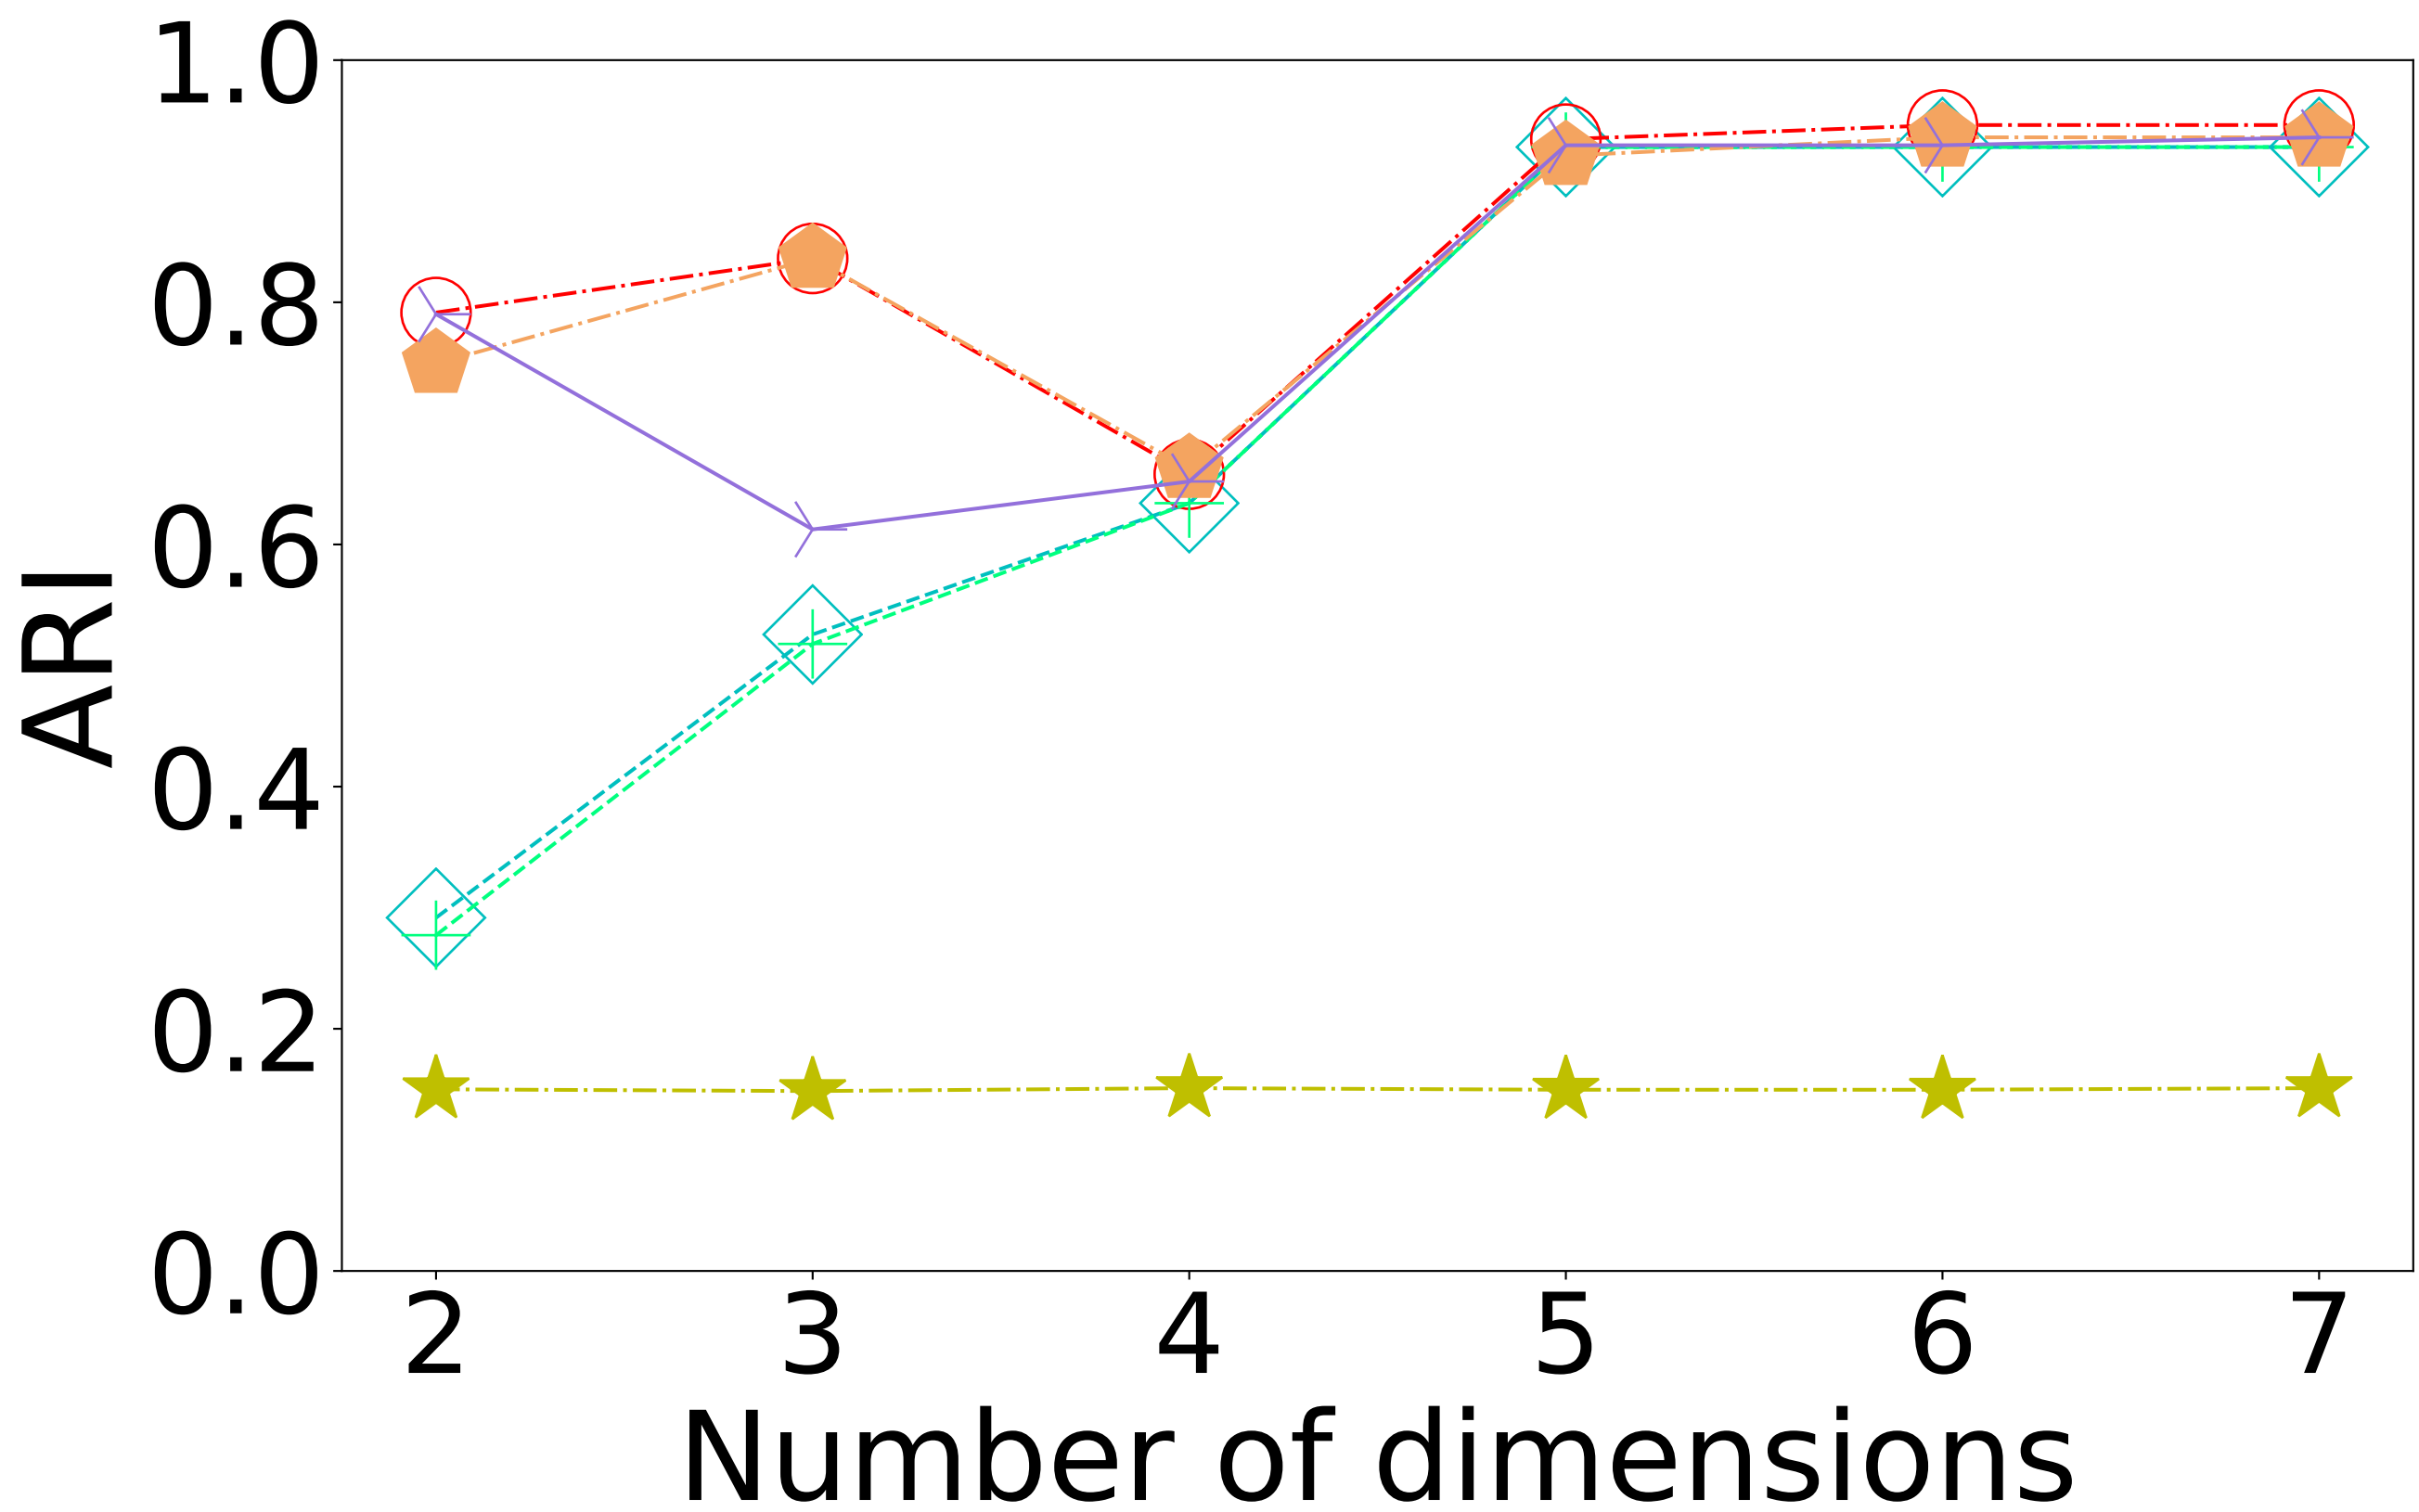

Supplement: supplementary_material [file attachment]

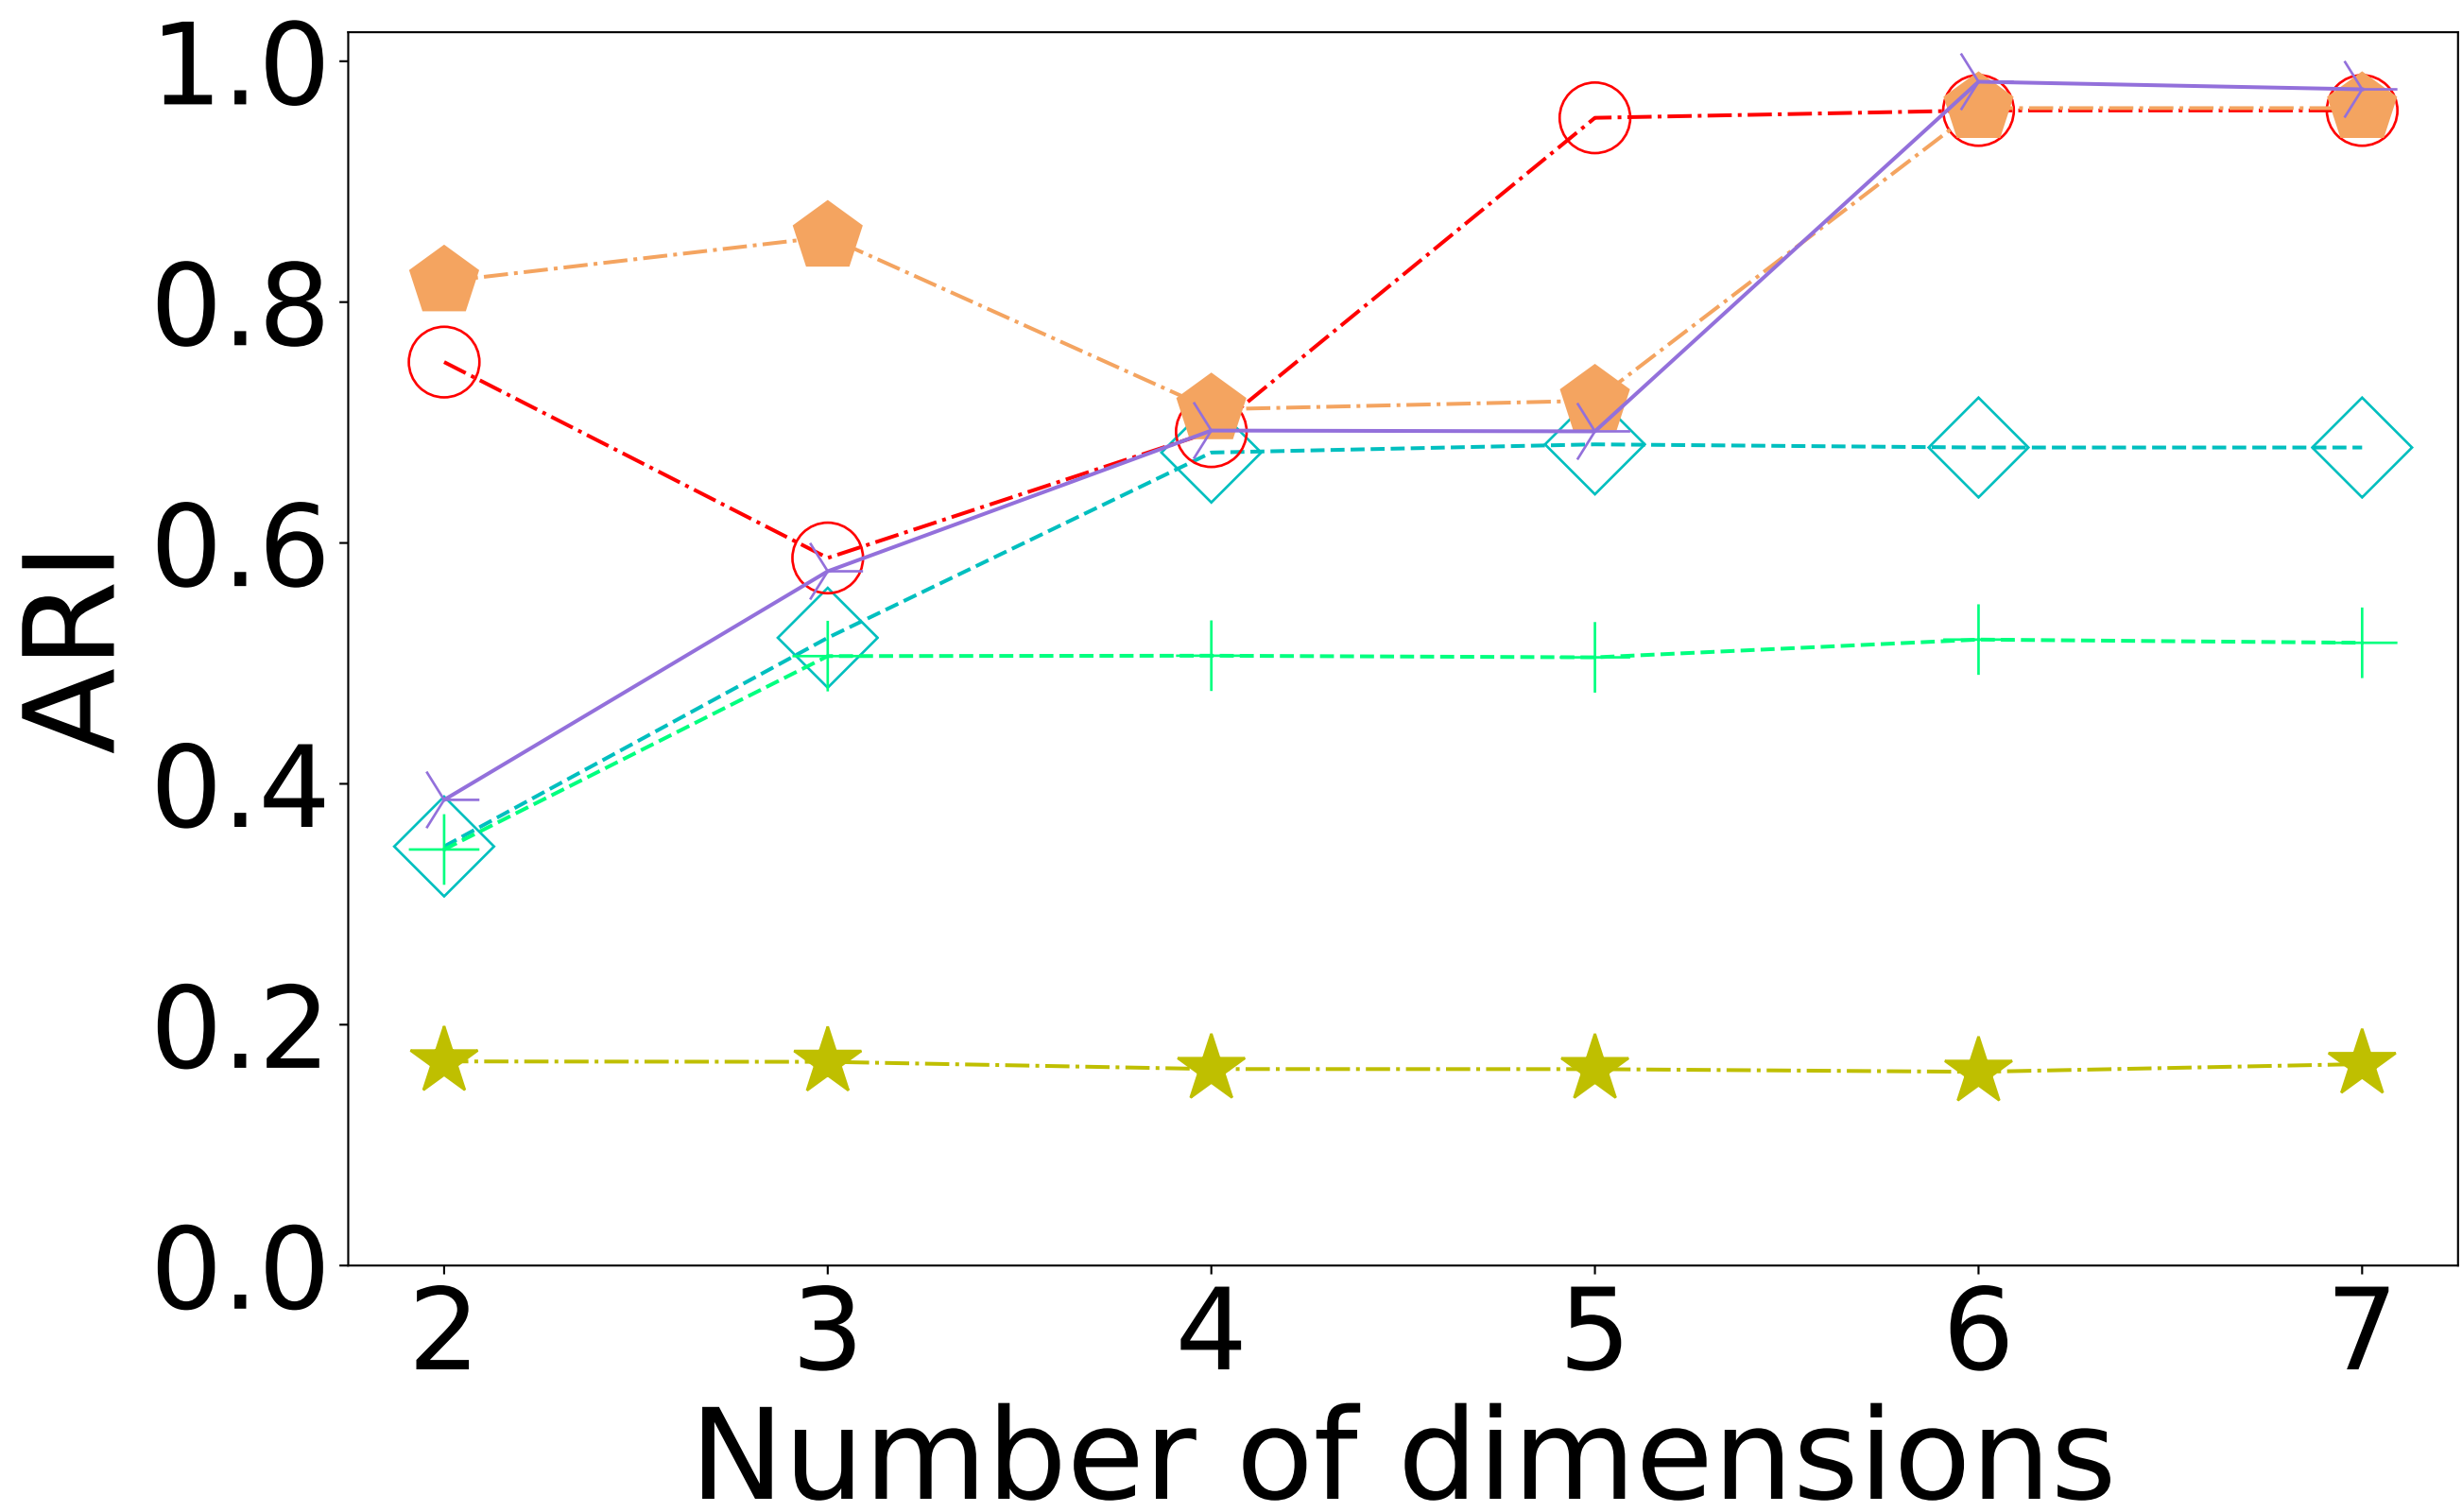

Supplement: supplementary_material [file attachment]

$D_E$ 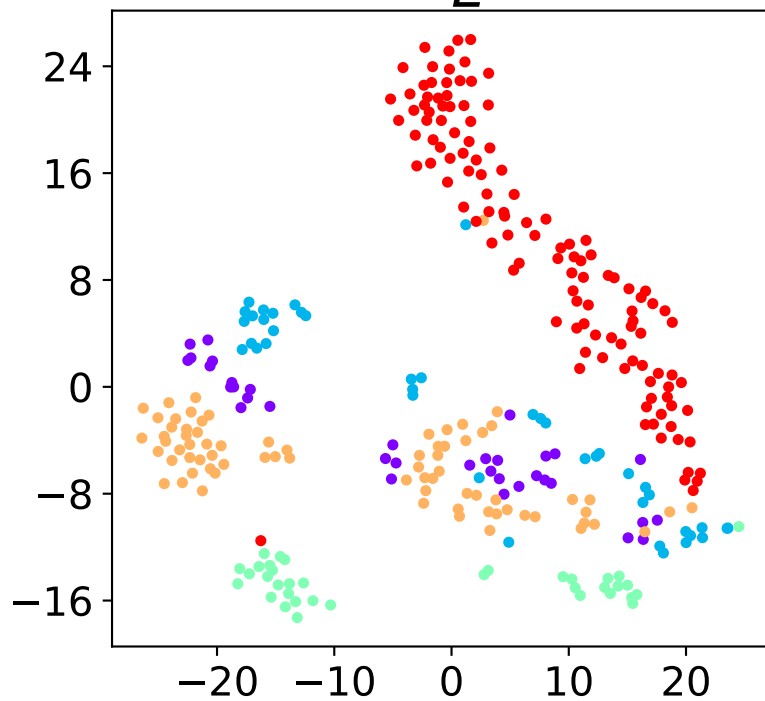 $D_r$ 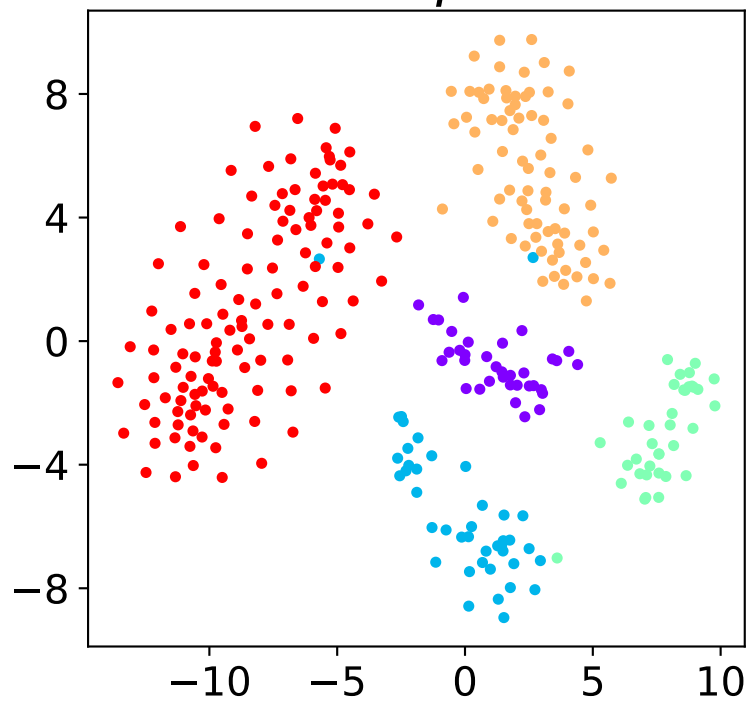 $D_{\text{asin}}$ 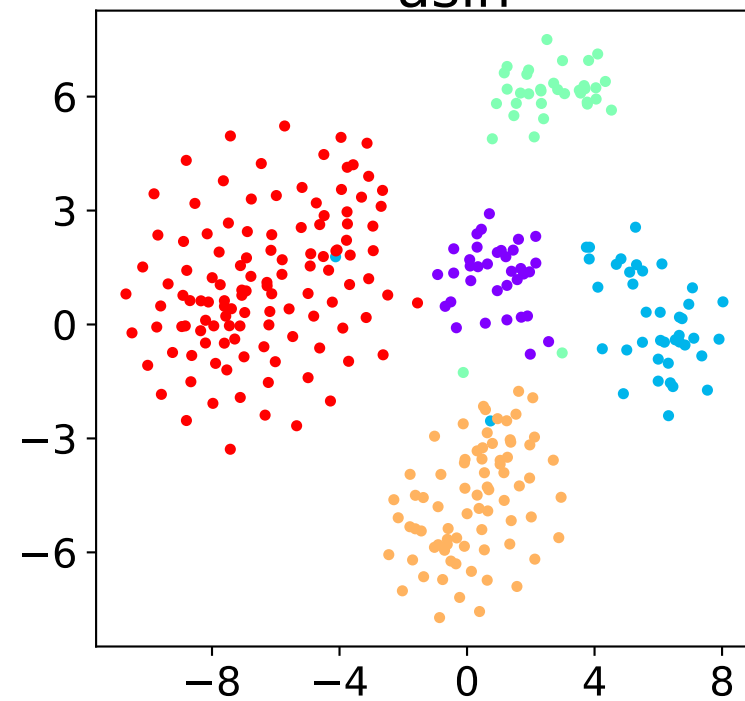 $D_{\text{log}}$ 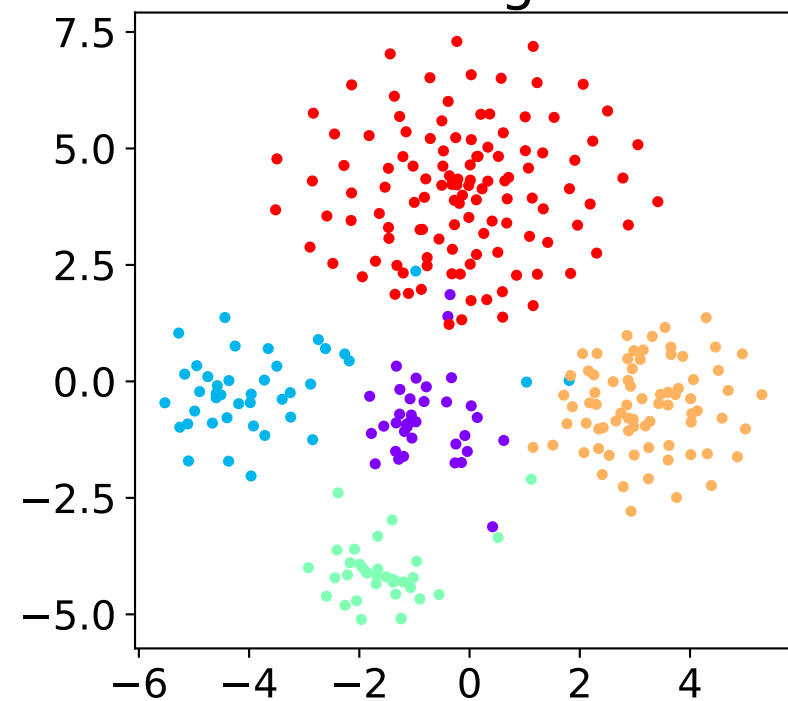 $D_P$ 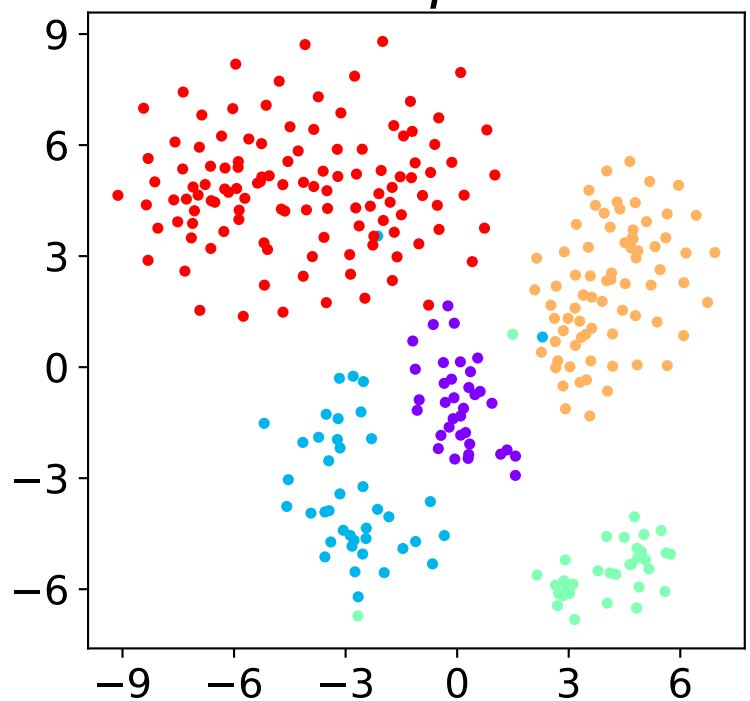 $D_{NB}$ 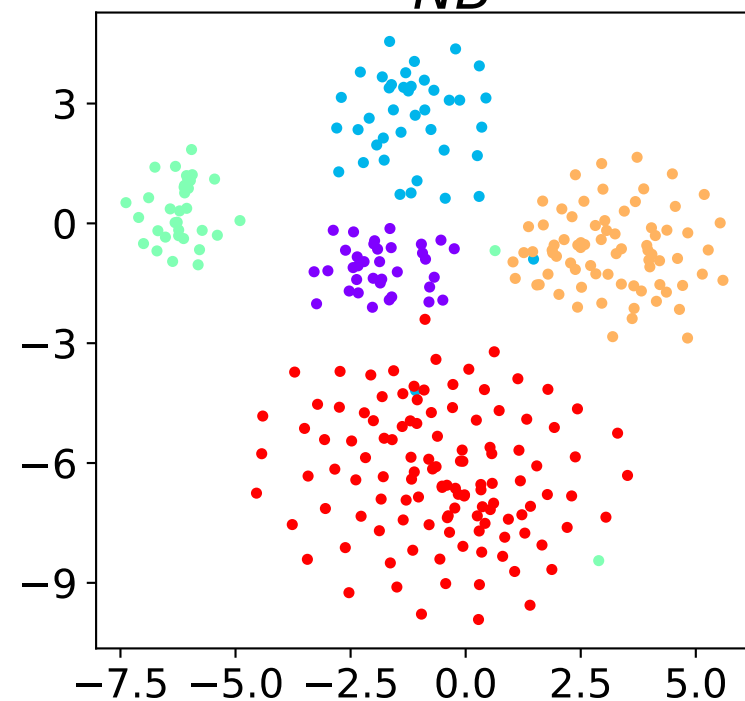

Supplement: supplementary_material [file attachment]

$D_E$ 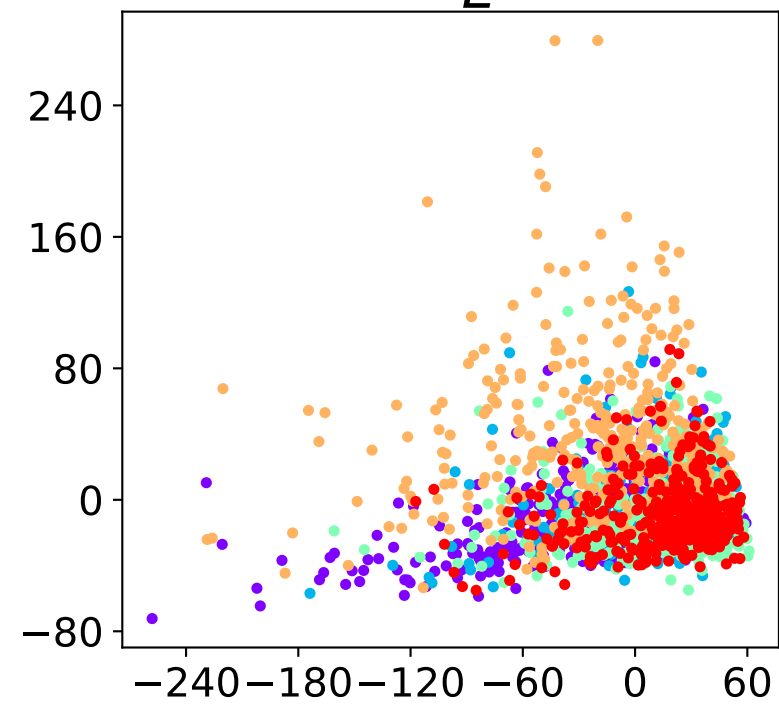 $D_r$ 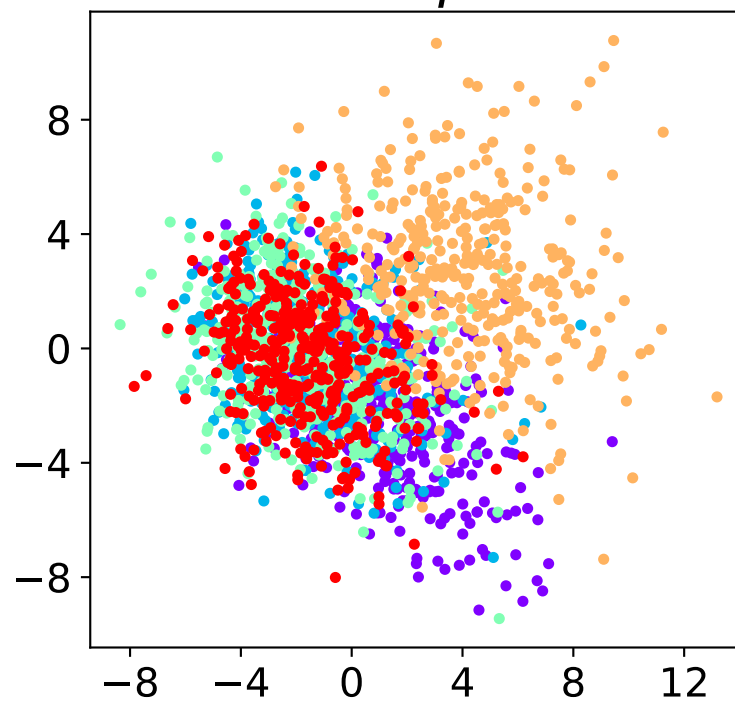 $D_{\text{asin}}$ 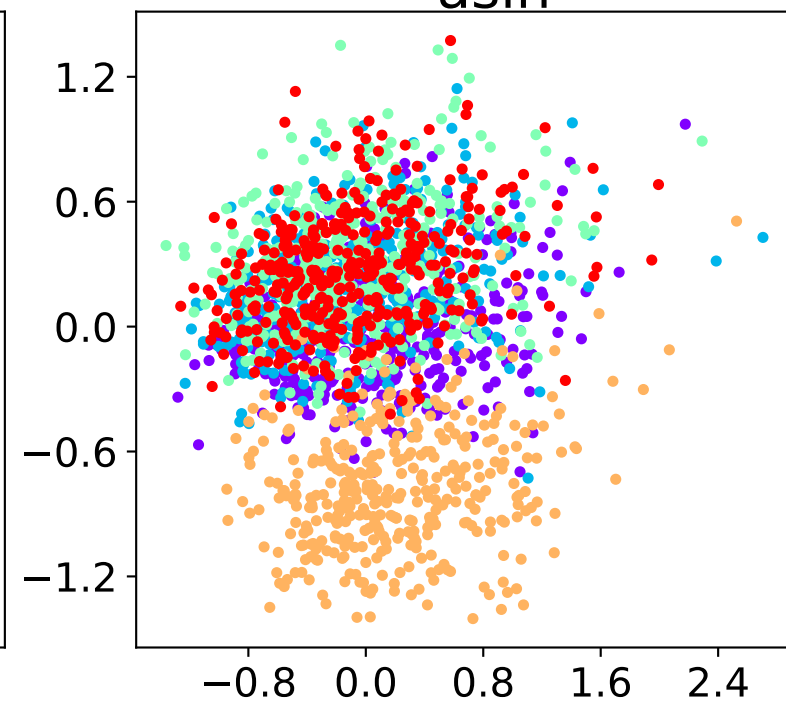 $D_{\log}$ 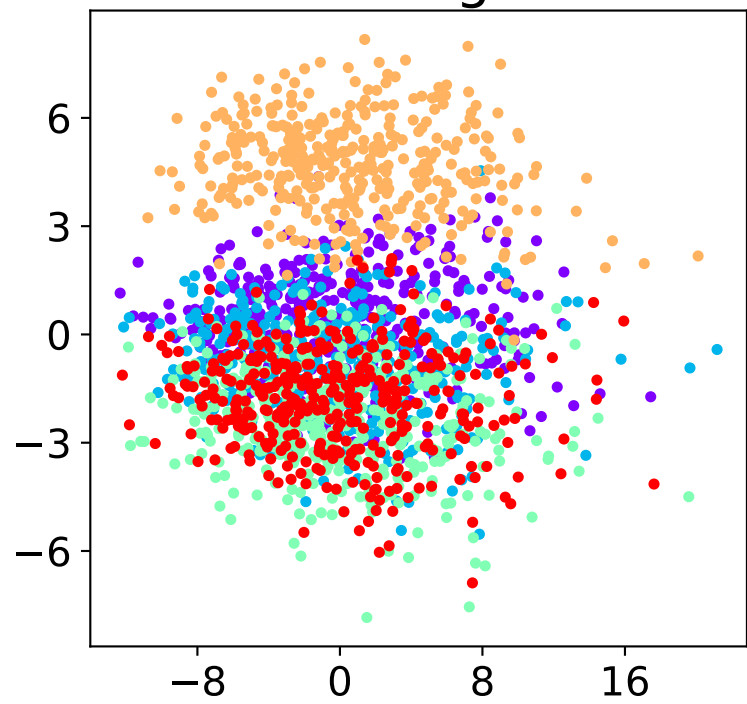 $D_P$ 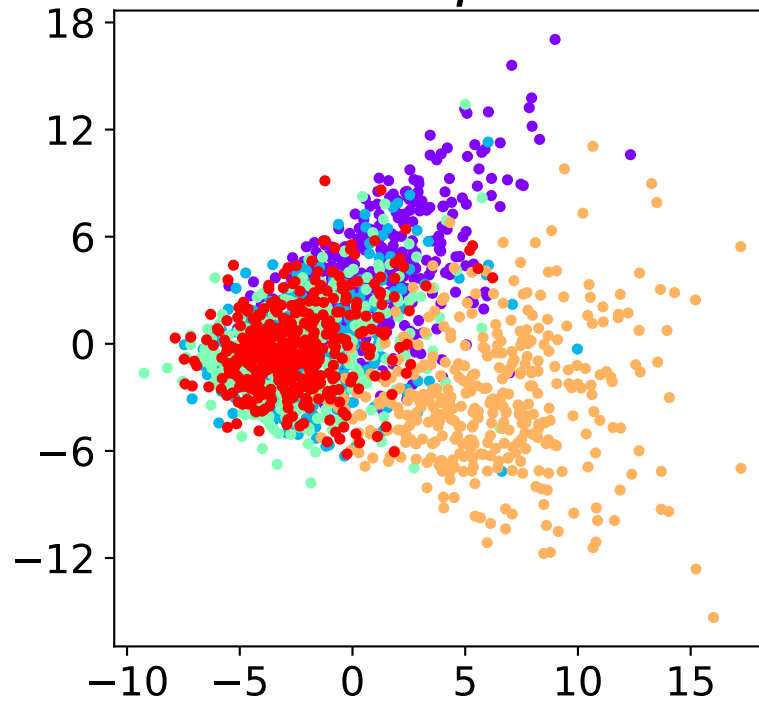 $D_{NB}$ 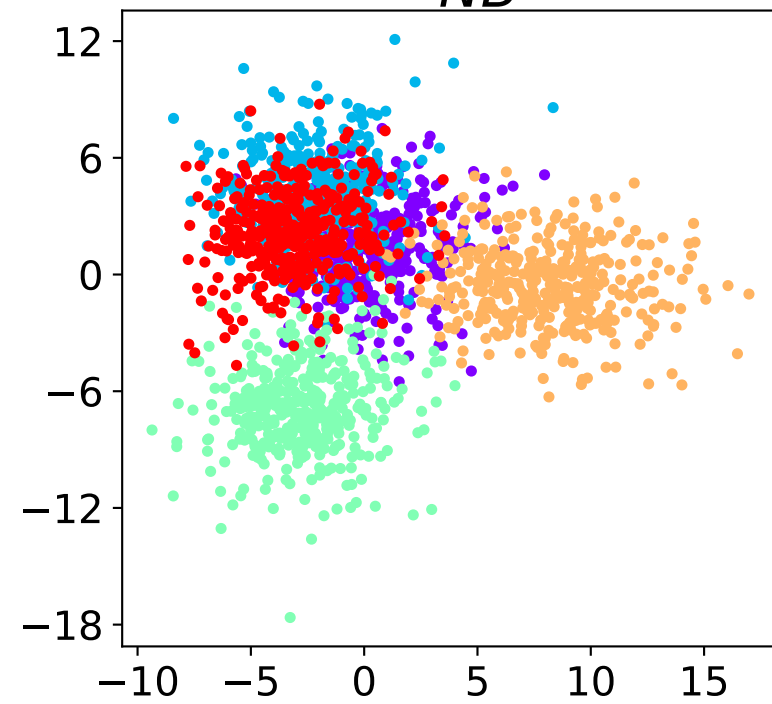

Supplement: supplementary_material [file attachment]

GPCA-P

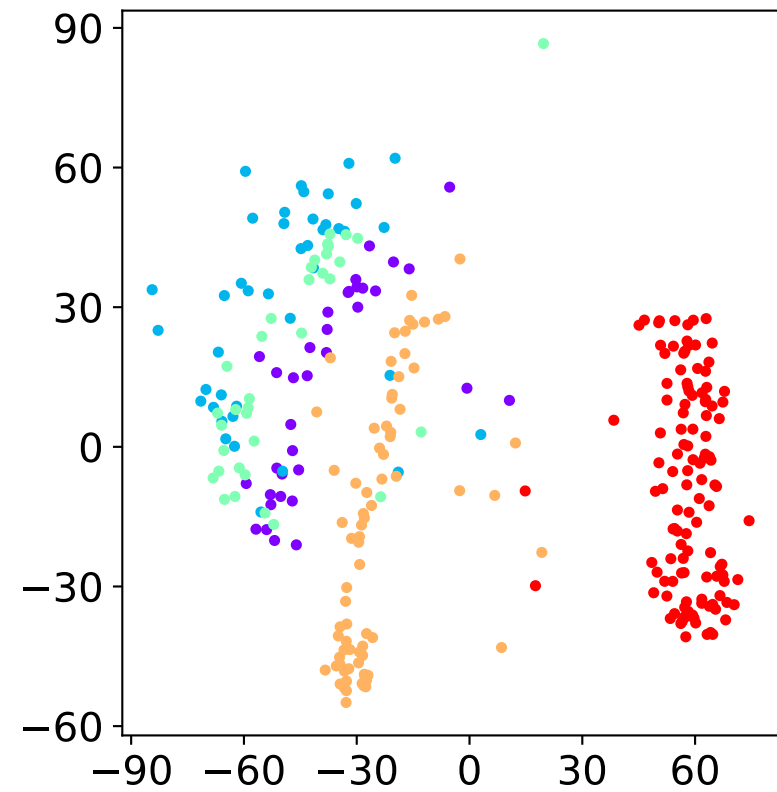

GPCA-NB

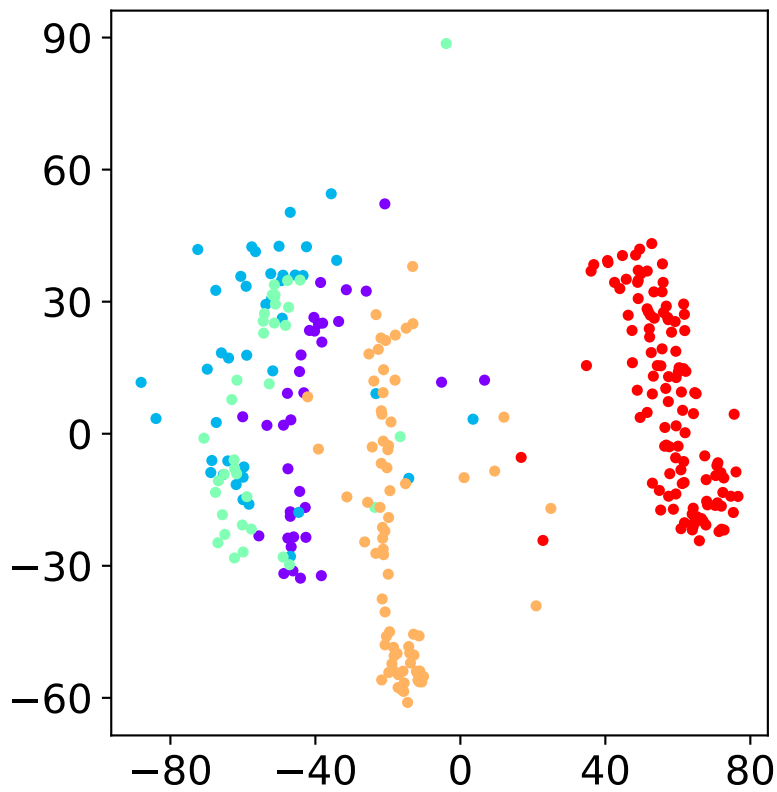

NMF

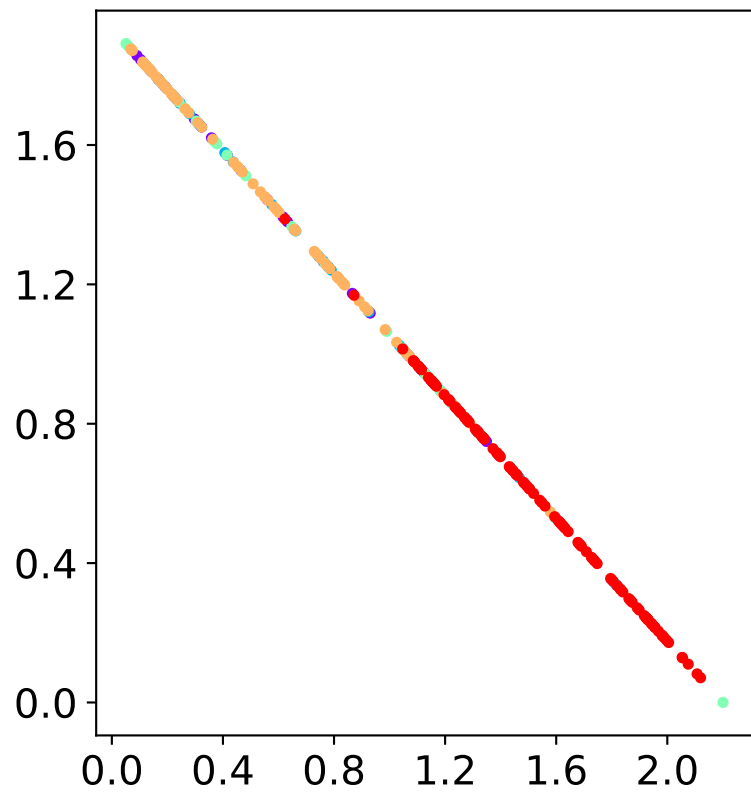

Supplement: supplementary_material [file attachment]

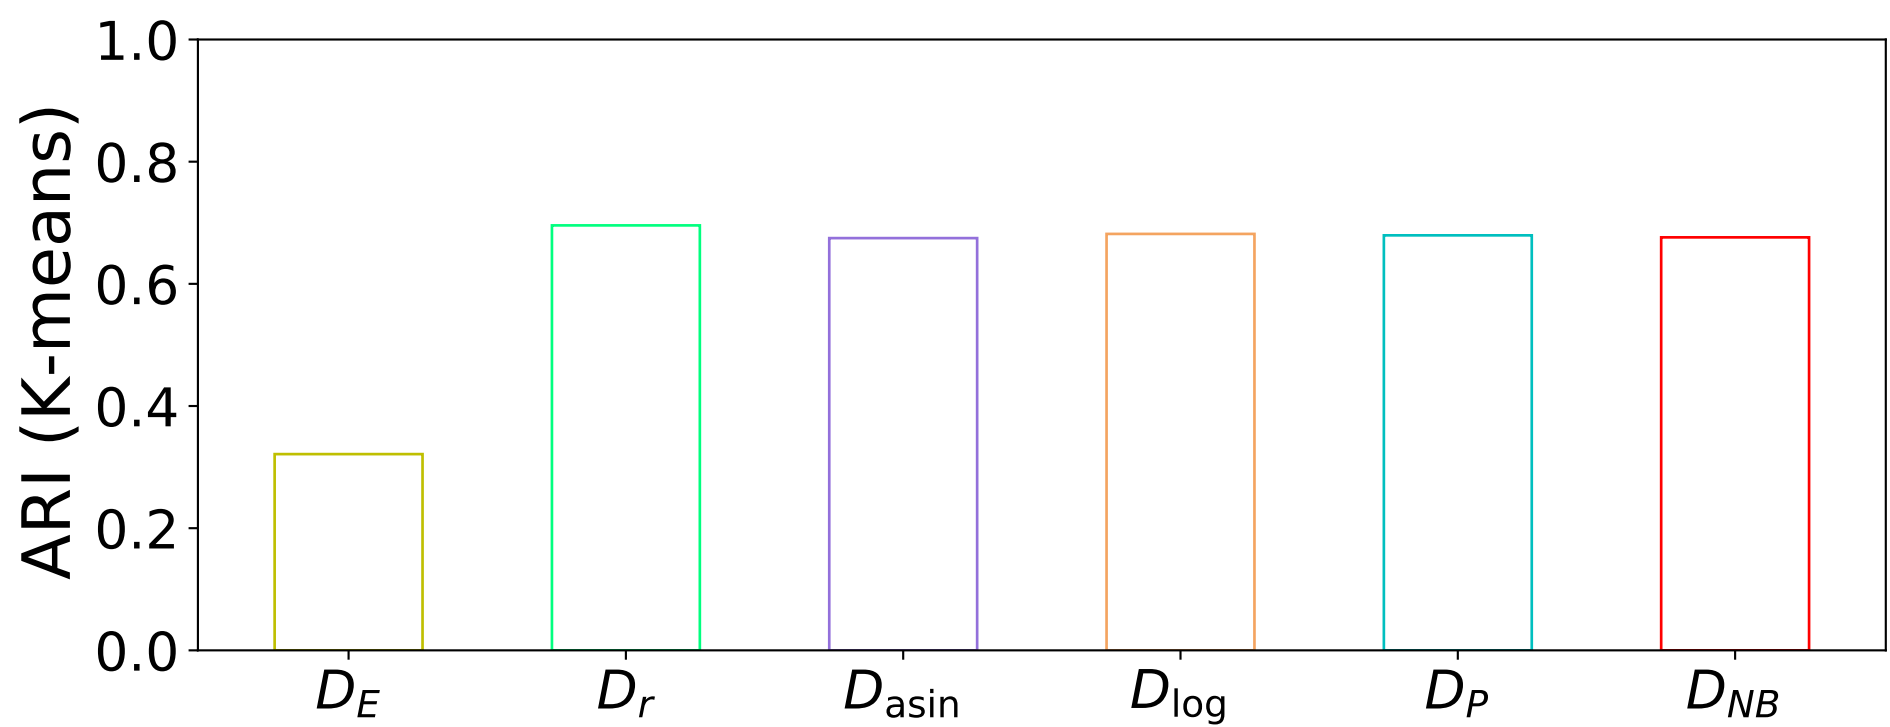

Supplement: supplementary_material [file attachment]

$D_E$ 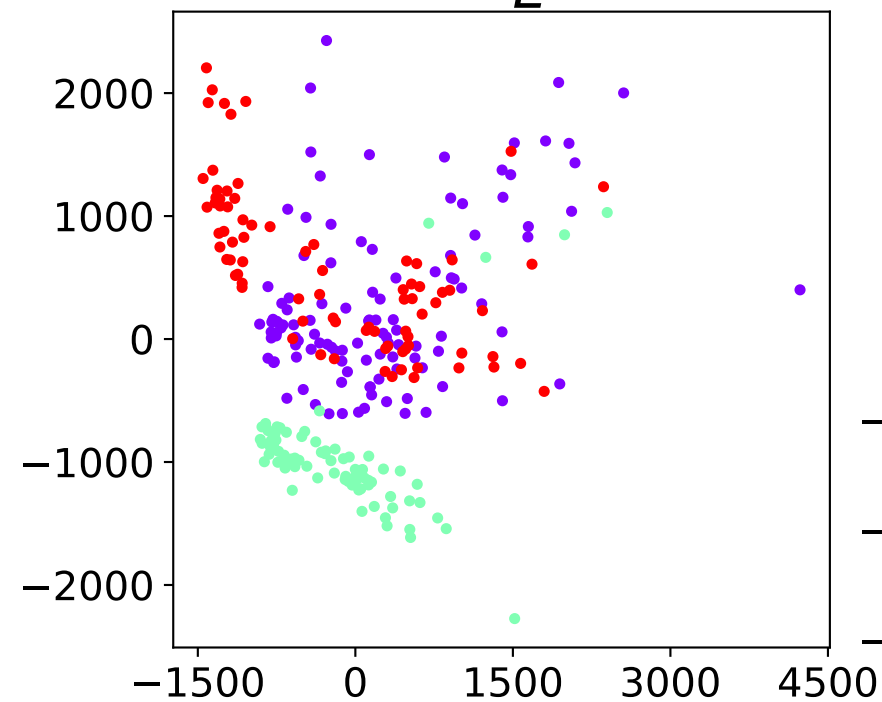 $D_r$ 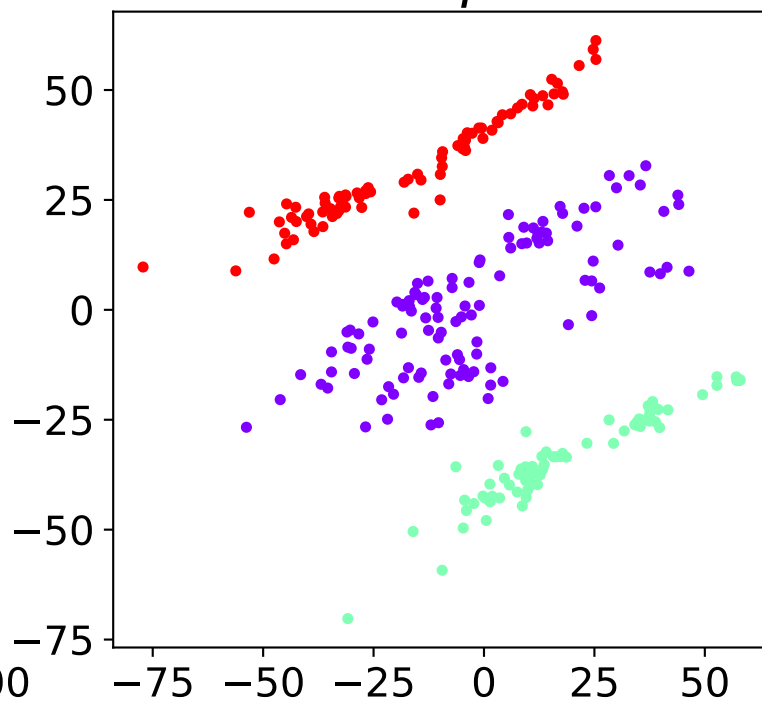 $D_{\text{asin}}$ 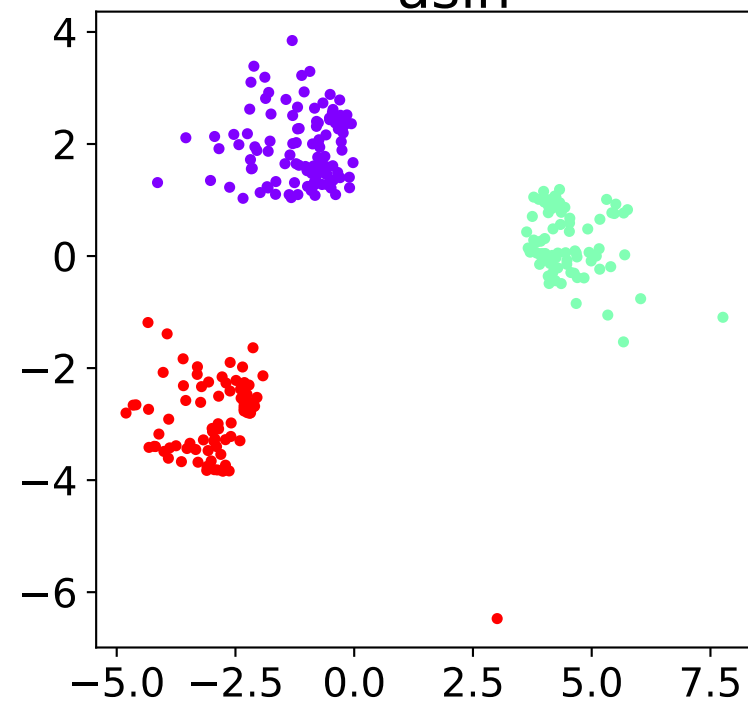 $D_{\log}$ 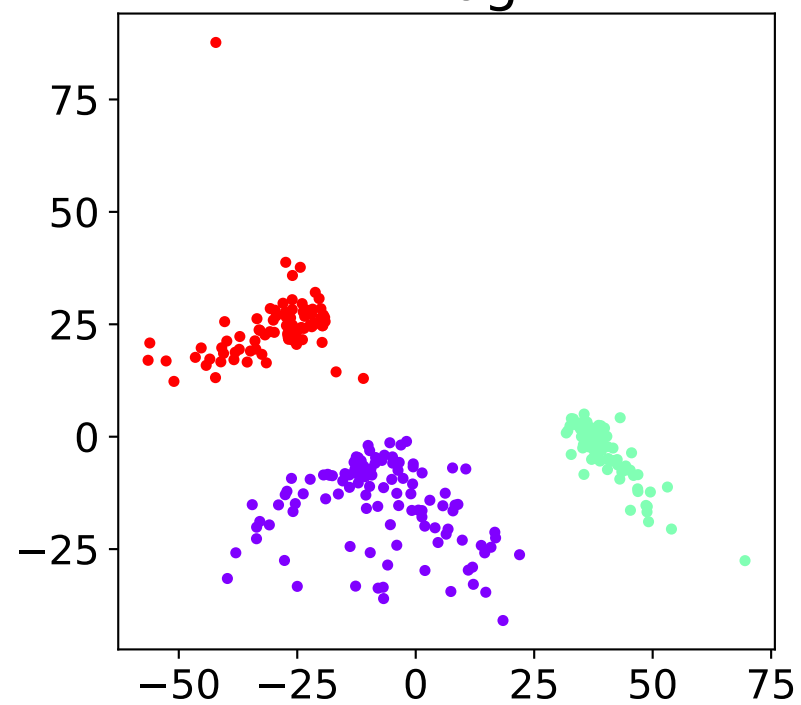 $D_P$ 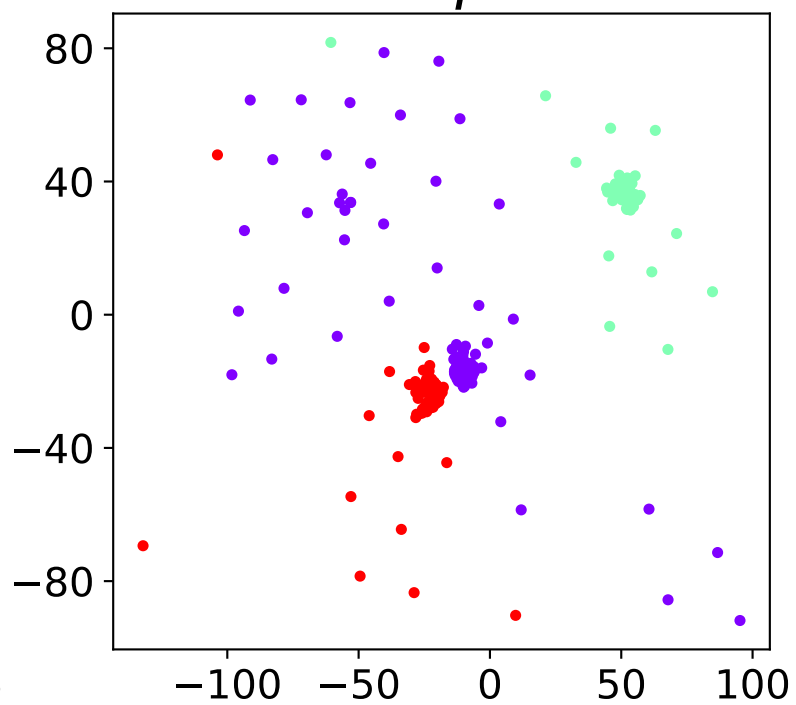 $D_{NB}$ 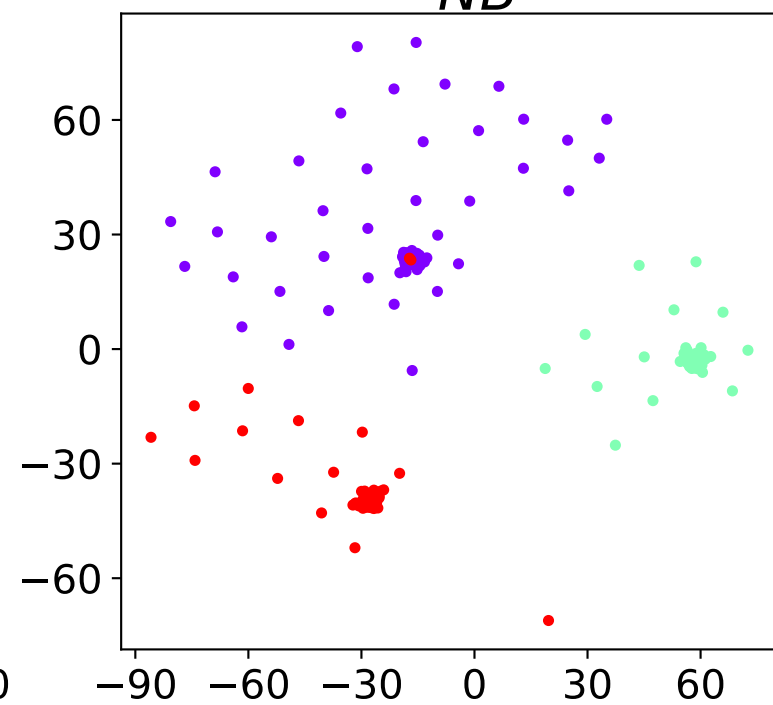

Supplement: supplementary_material [file attachment]

GPCA-P

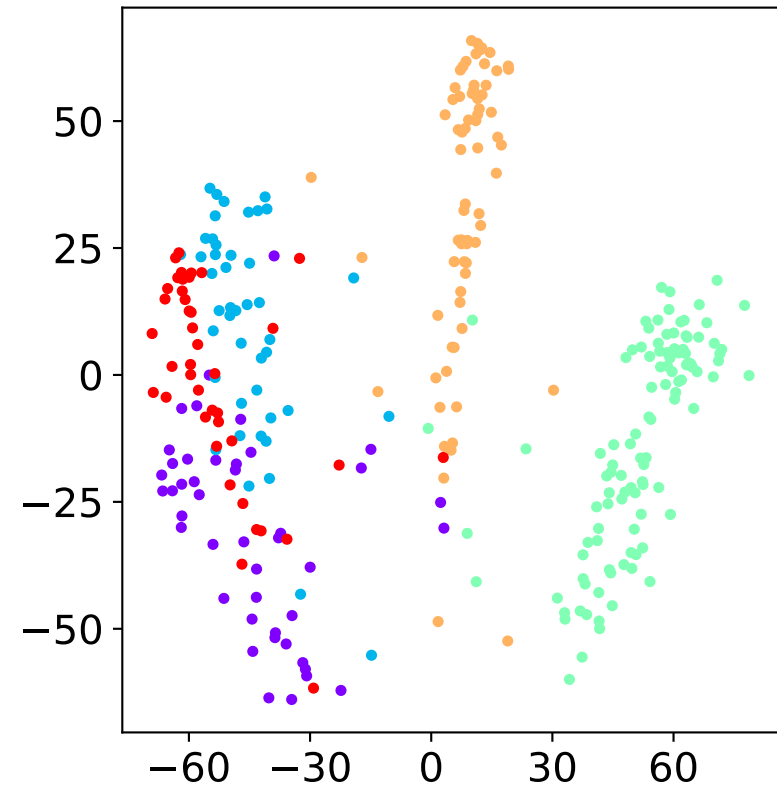

GPCA-NB

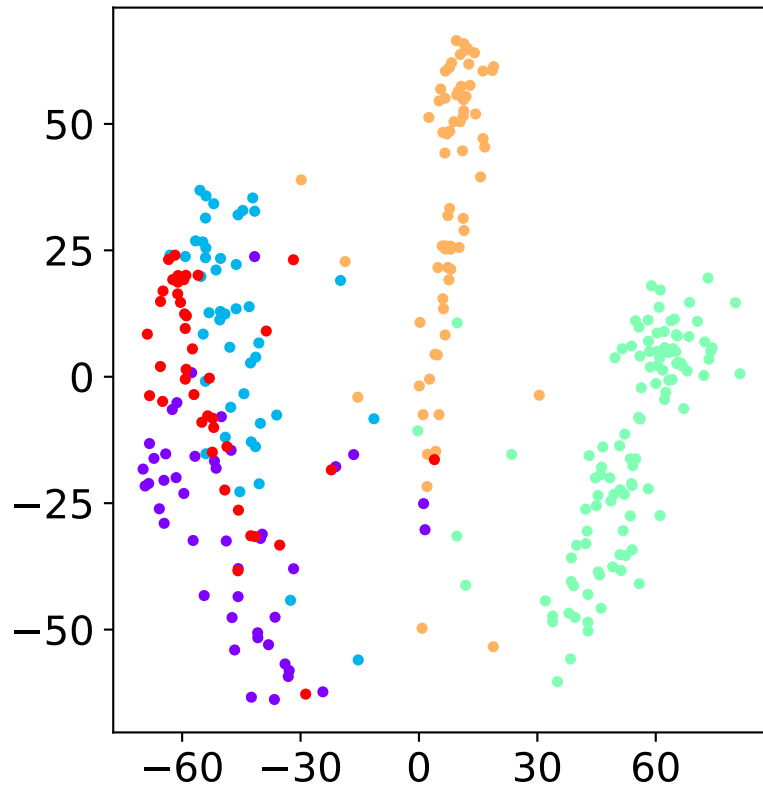

NMF

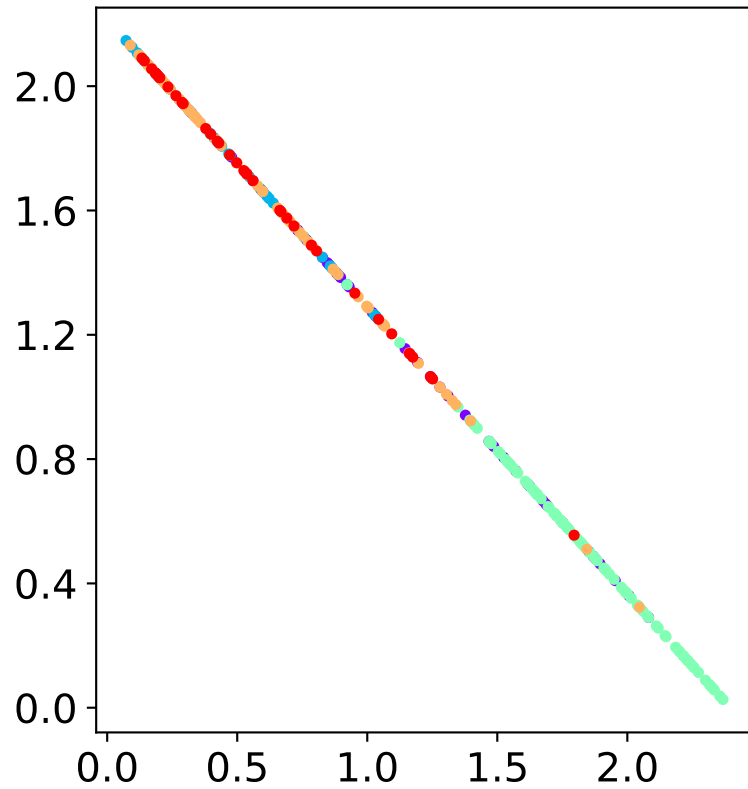

Supplement: supplementary_material [file attachment]

GPCA-P

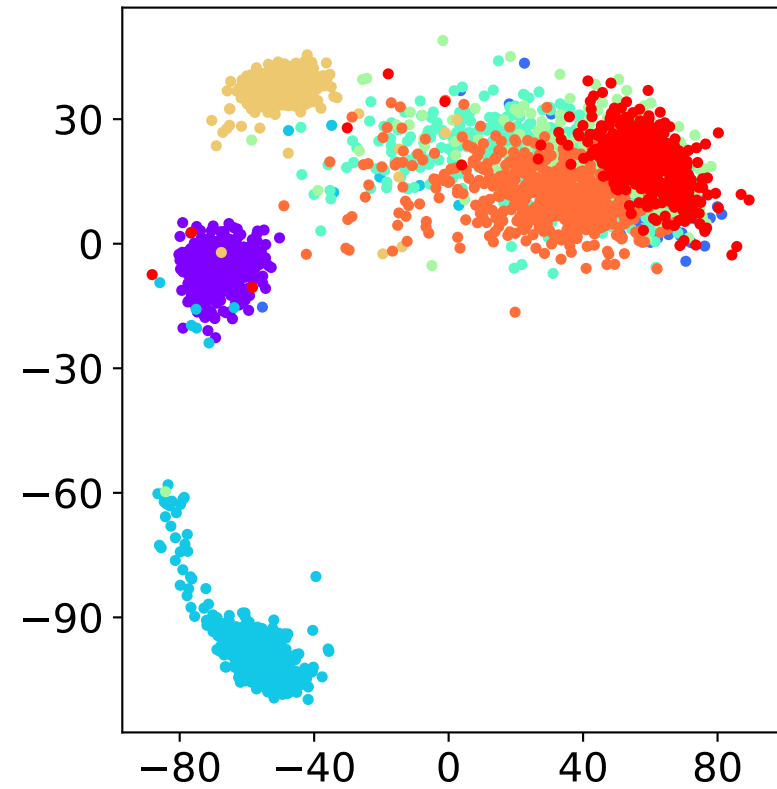

GPCA-NB

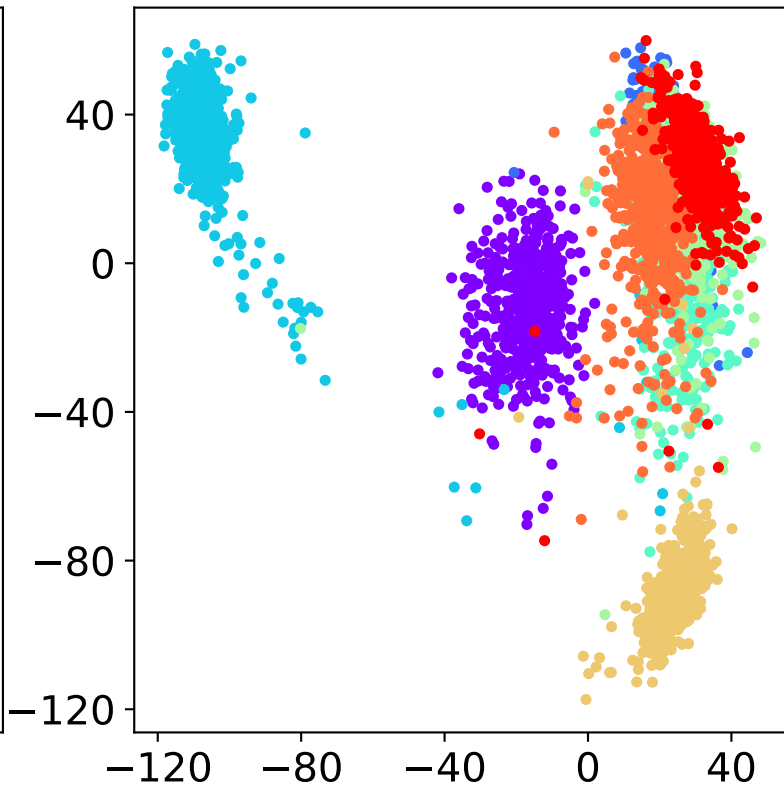

NMF

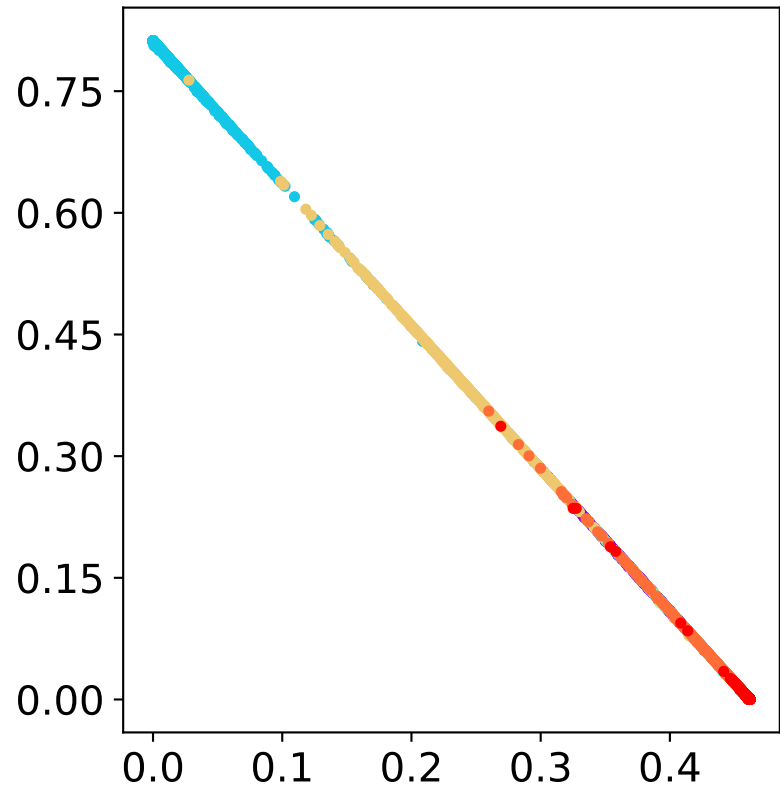

Supplement: supplementary_material [file attachment]

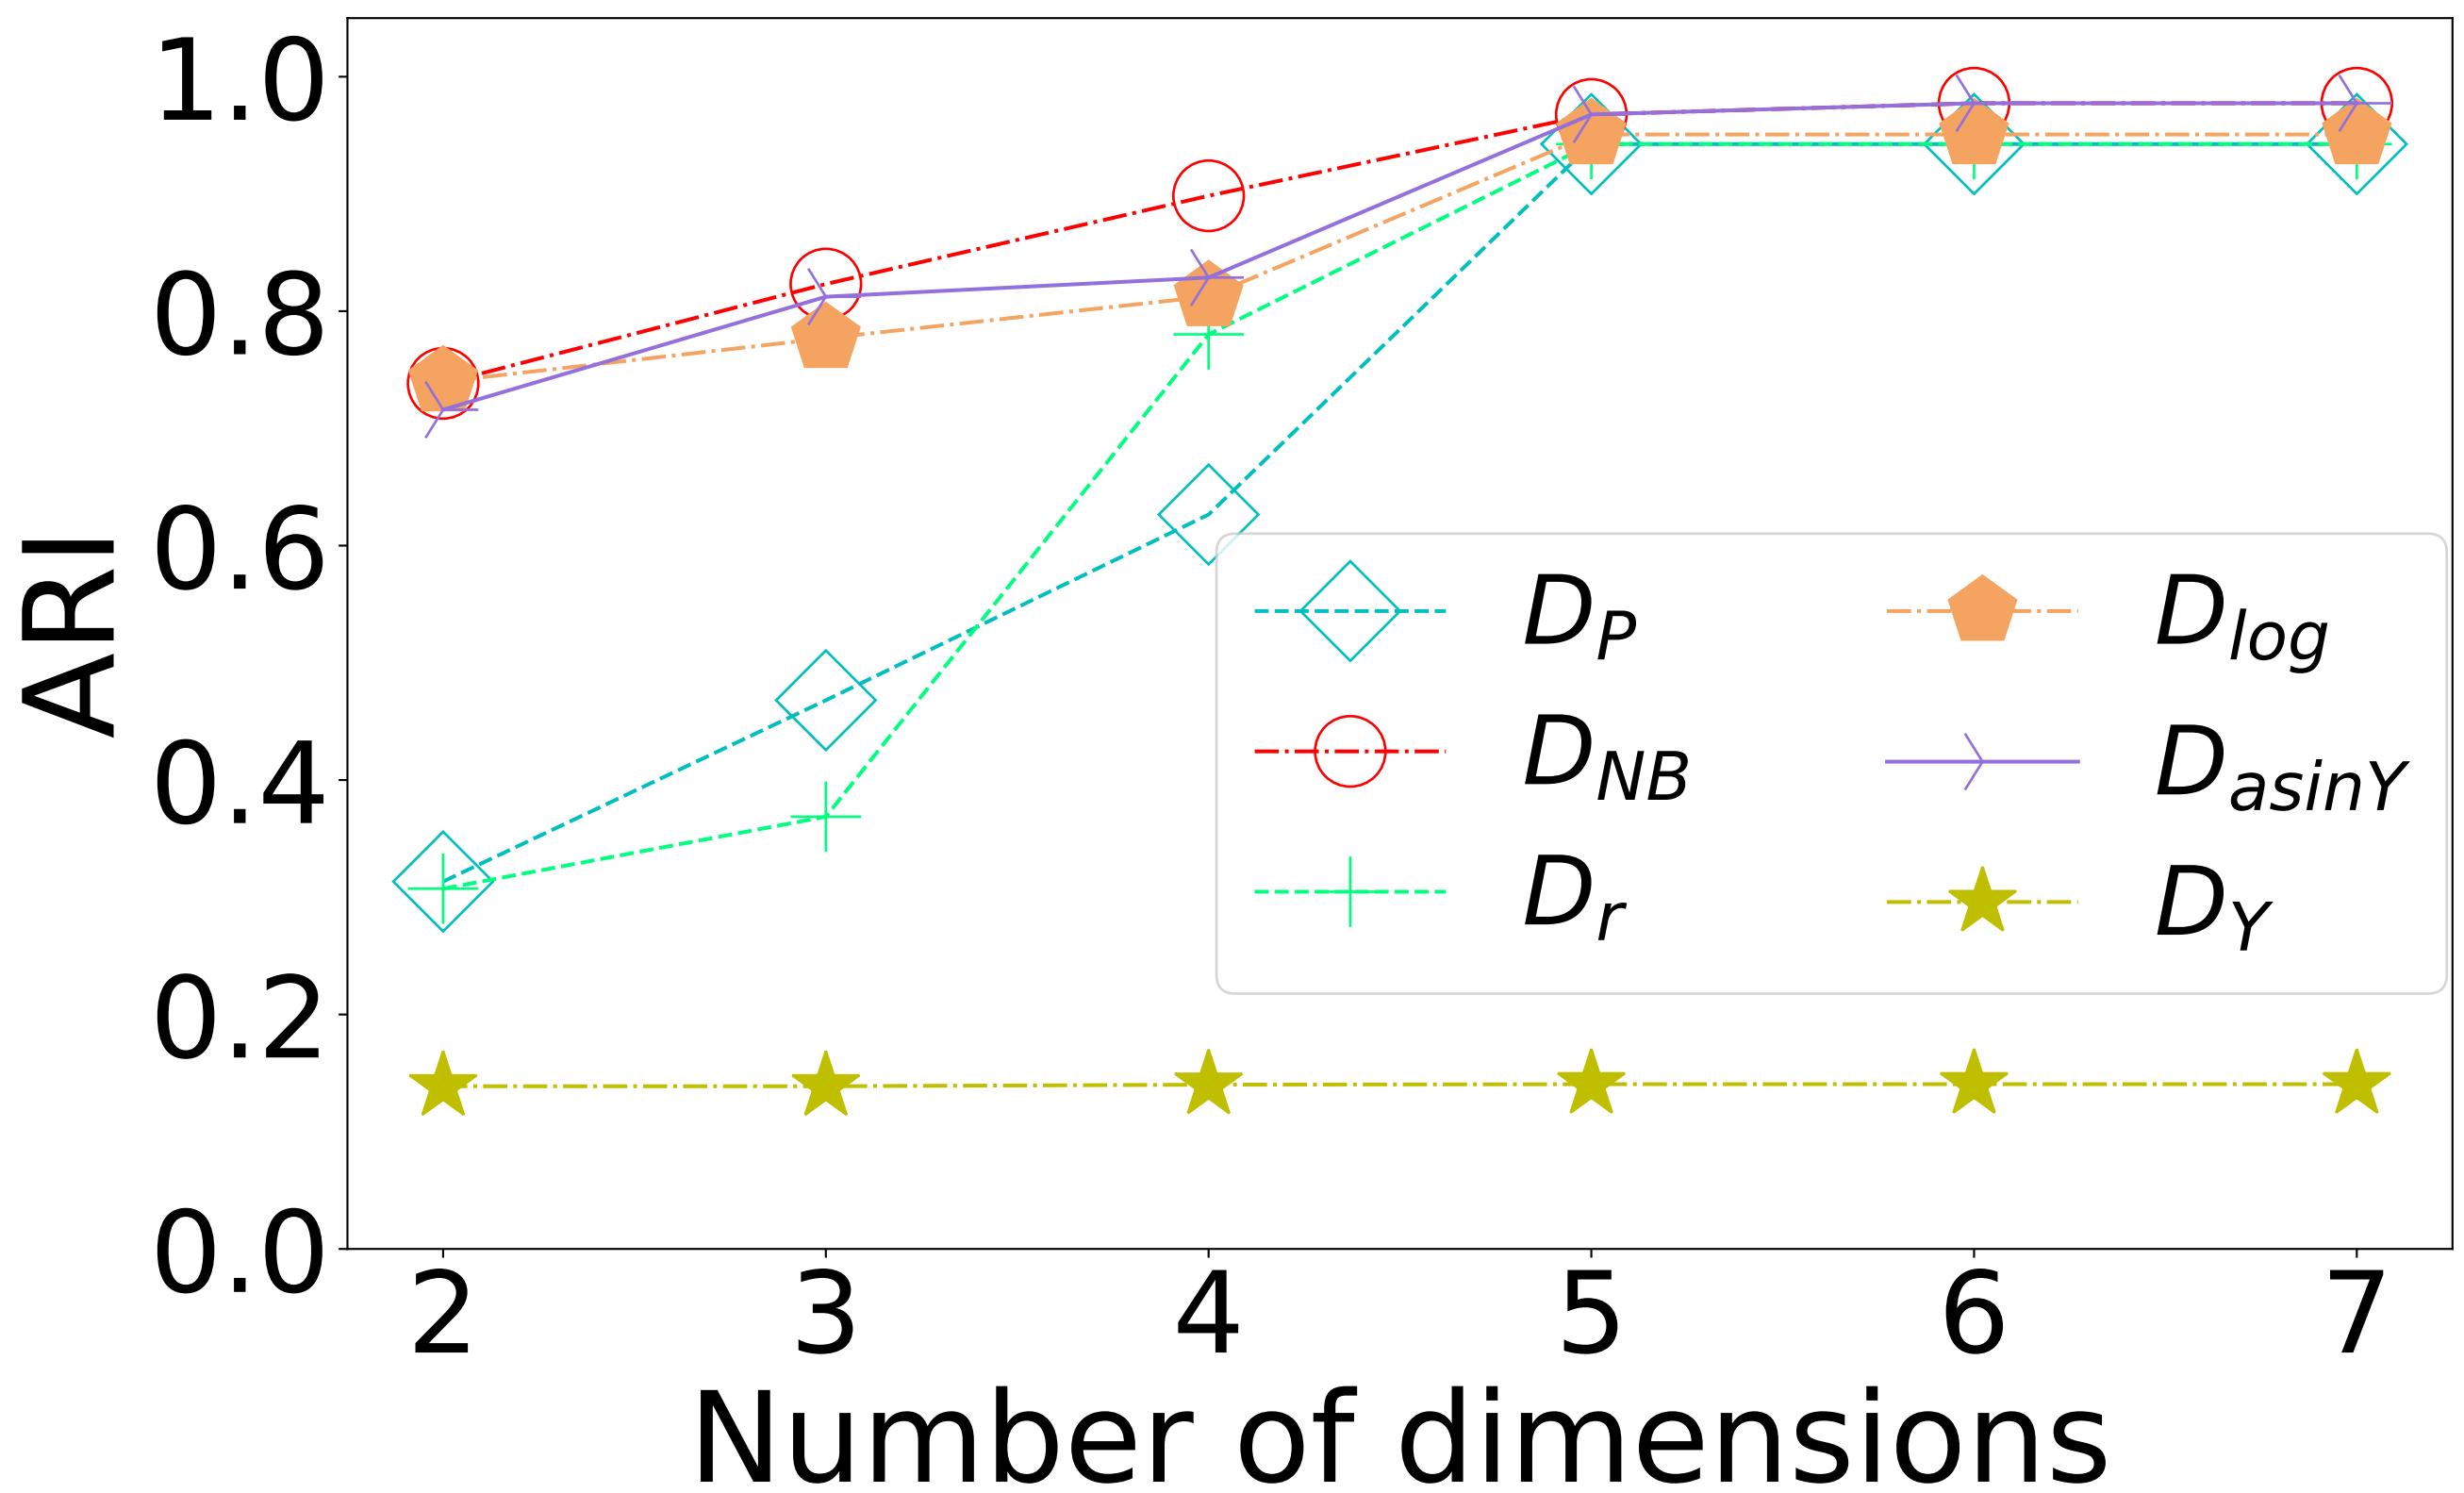

Supplement: supplementary_material [file attachment]

$D_E$ 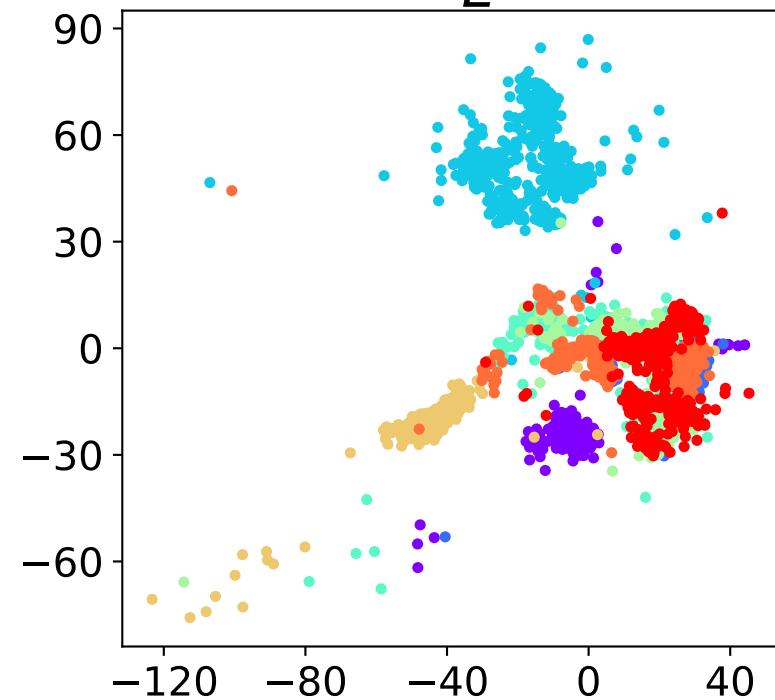 $D_r$ 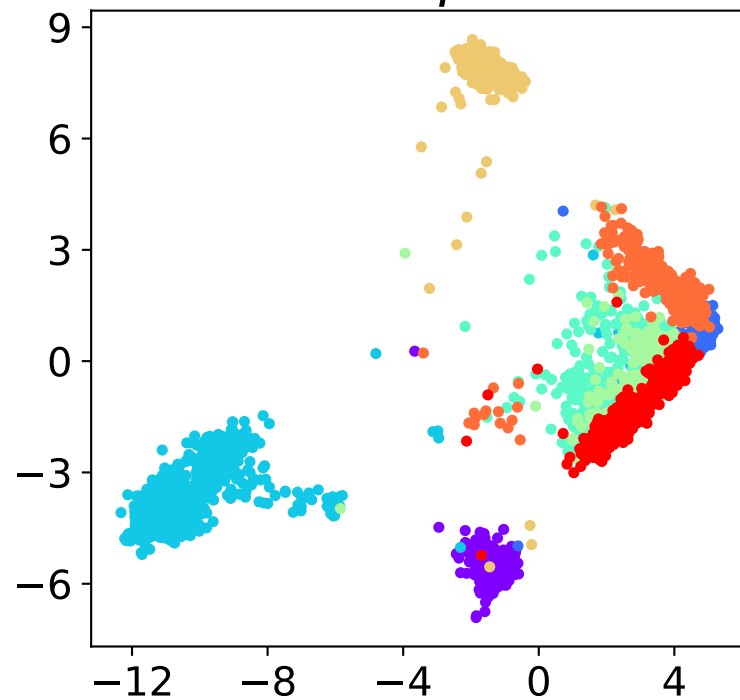 $D_{\text{asin}}$ 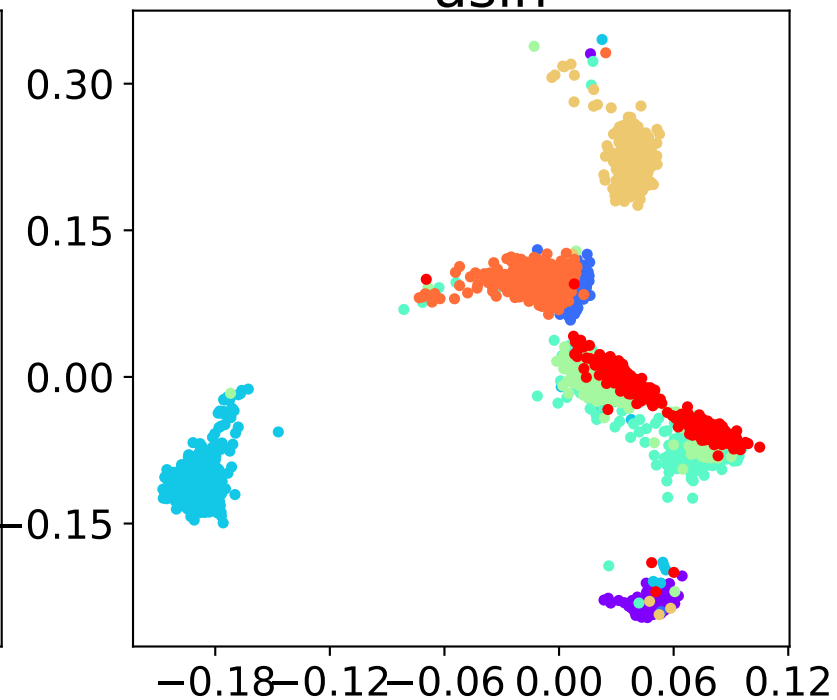 $D_{\text{log}}$ 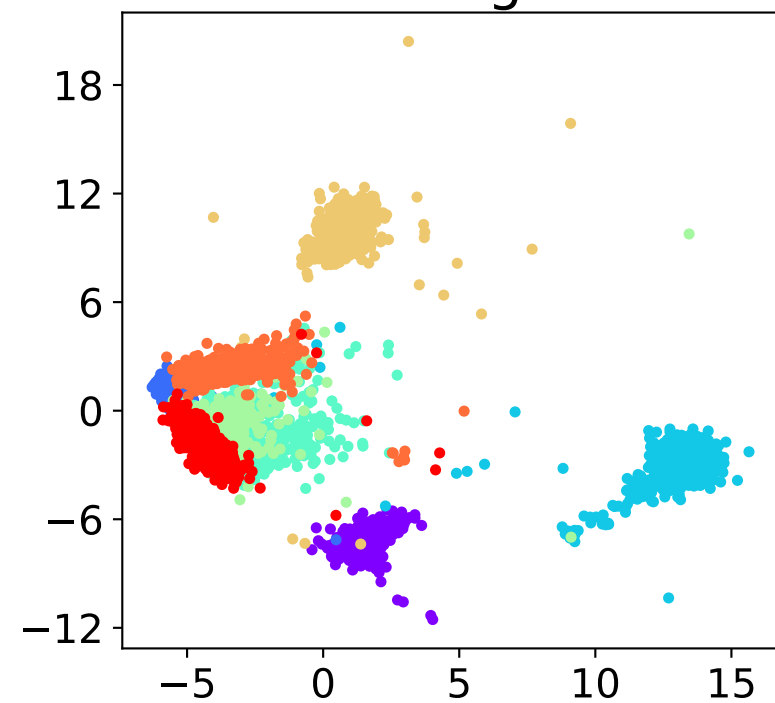 $D_P$ 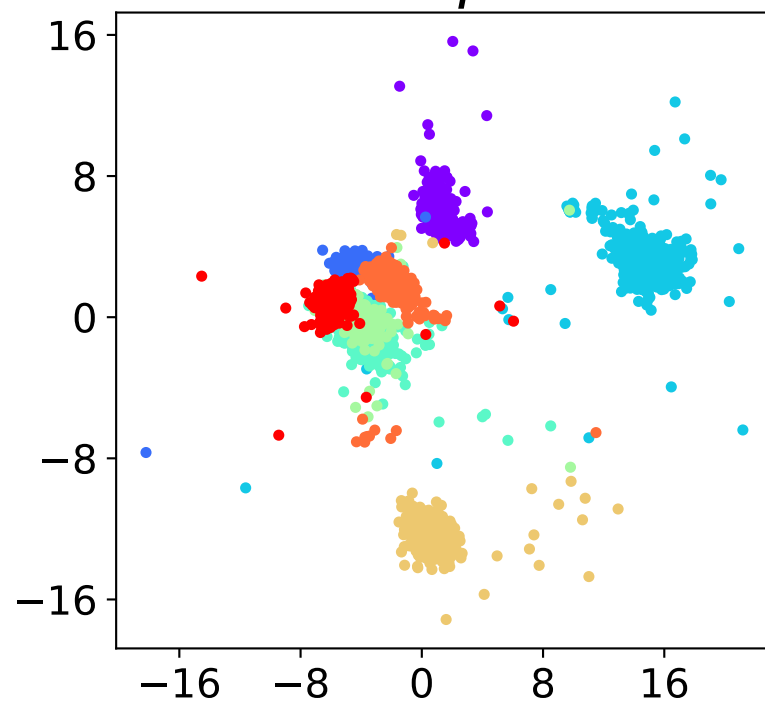 $D_{NB}$ 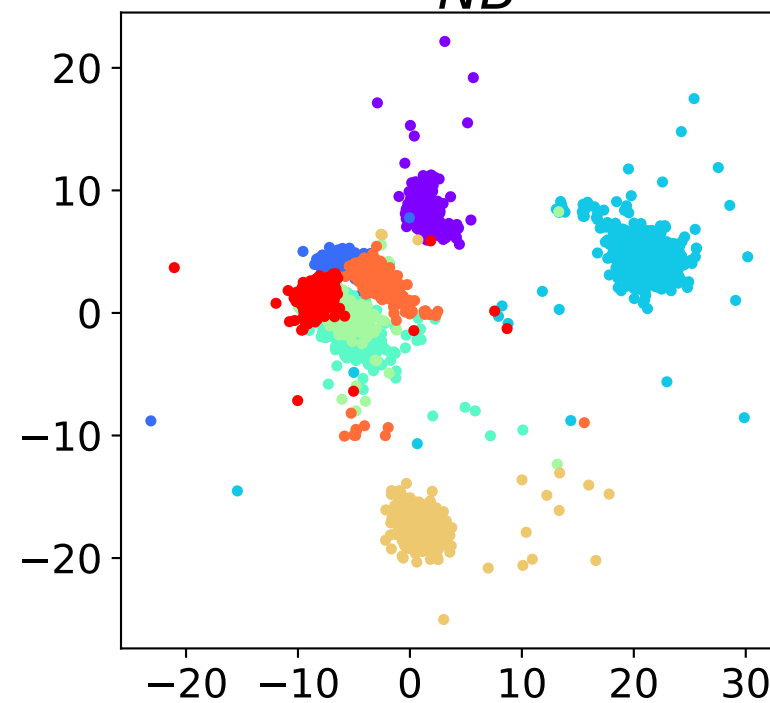

Supplement: supplementary_material [file attachment]

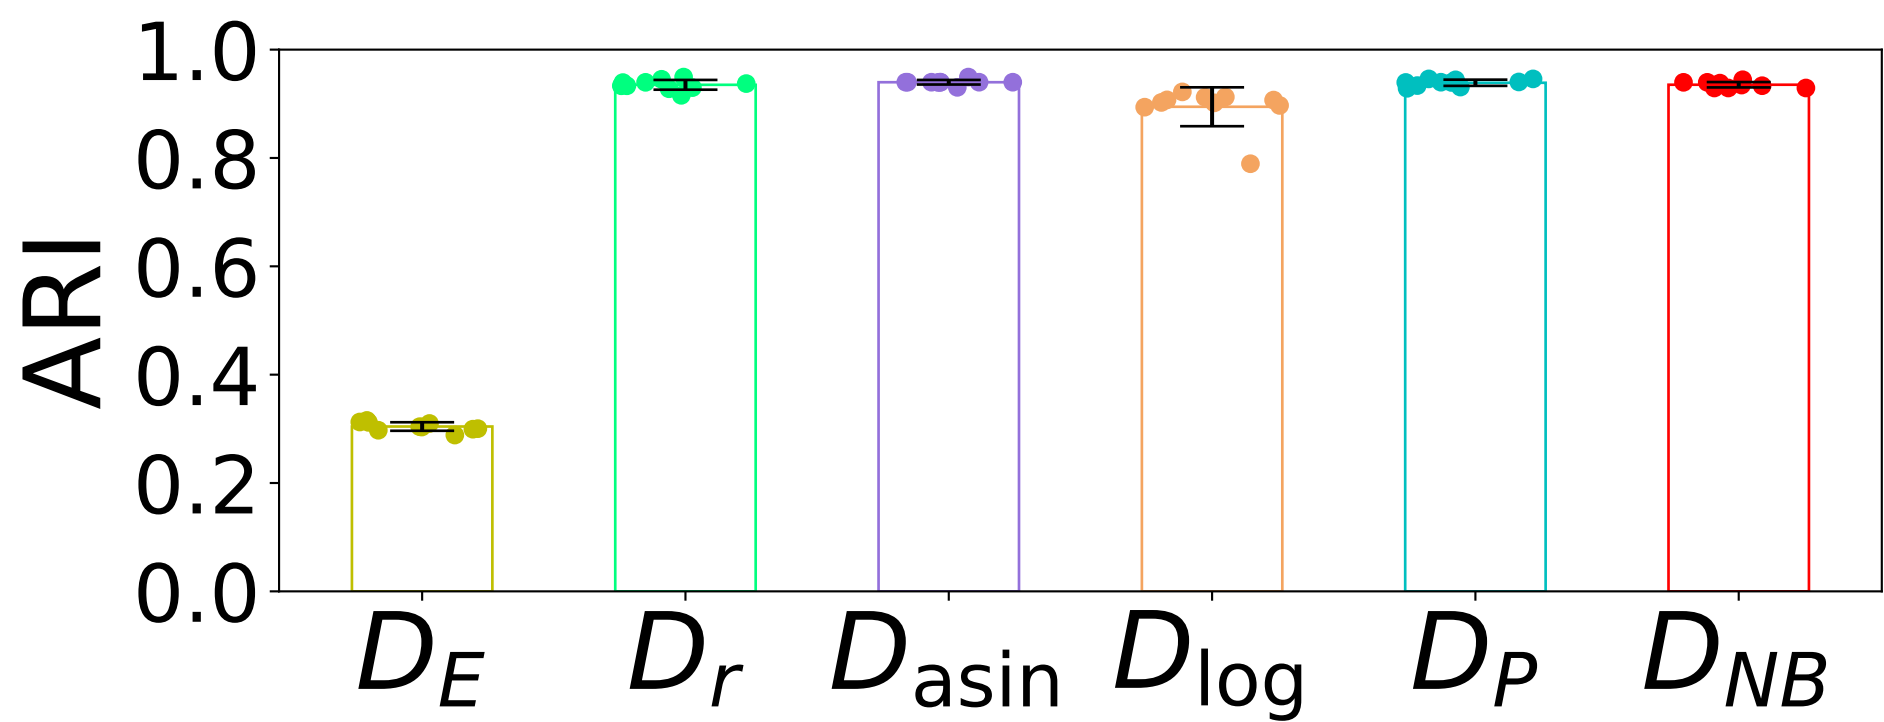

Supplement: supplementary_material [file attachment]

GPCA-P

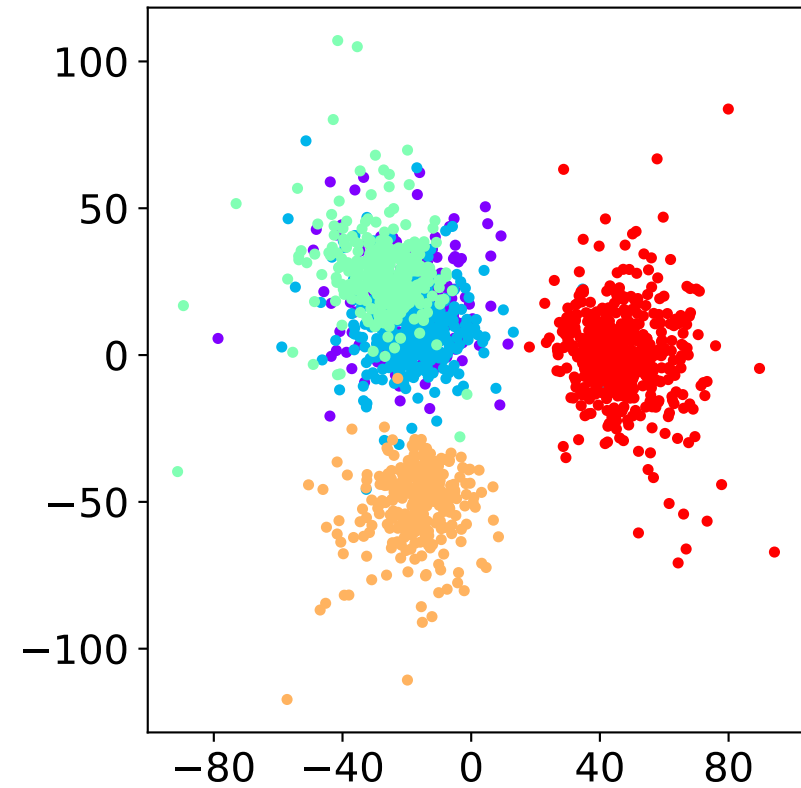

GPCA-NB

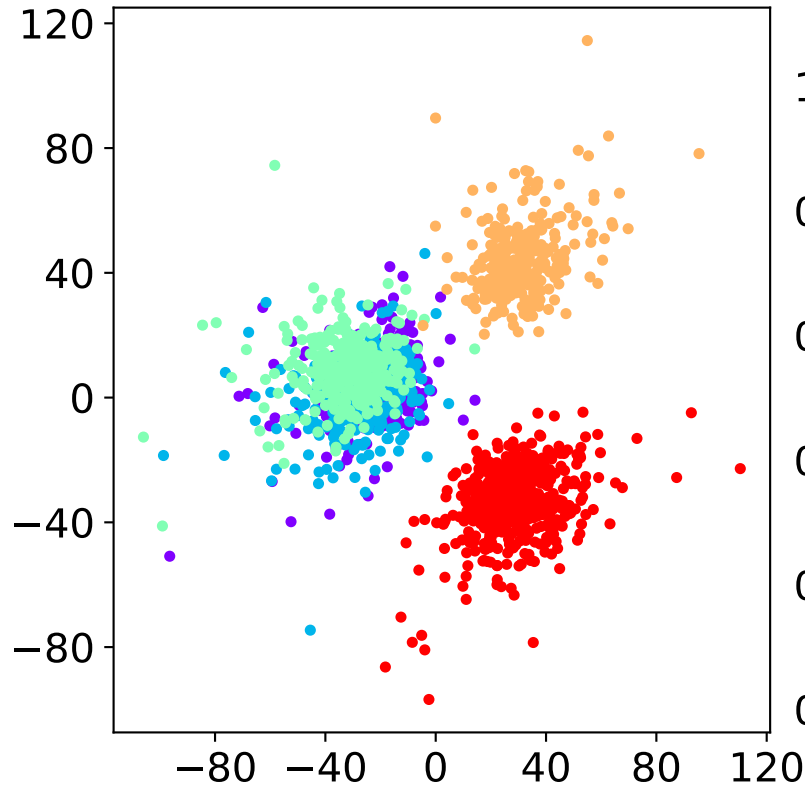

NMF

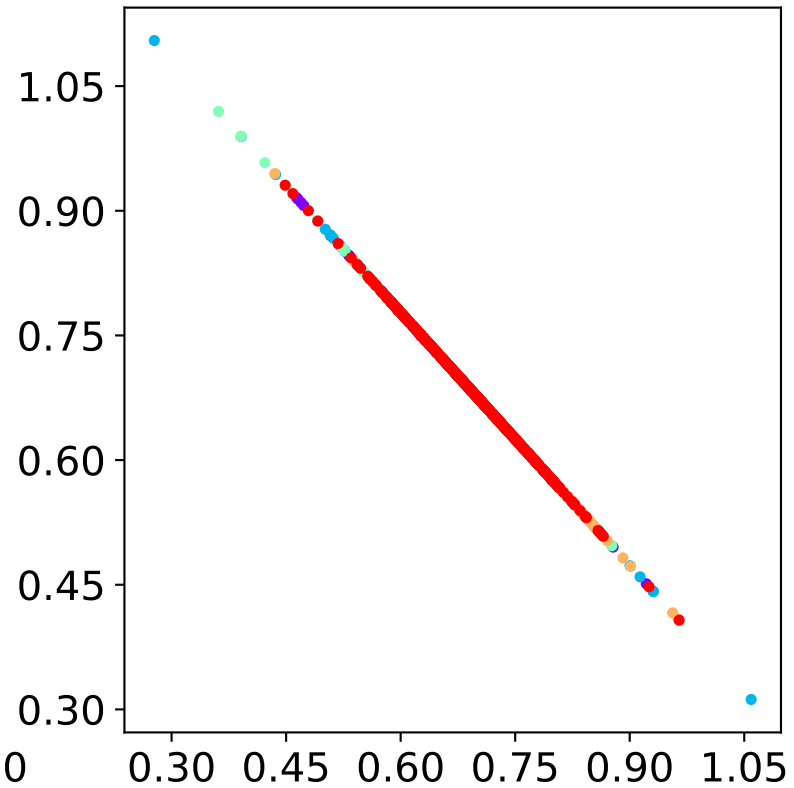

Supplement: supplementary_material [file attachment]

$D_E$ 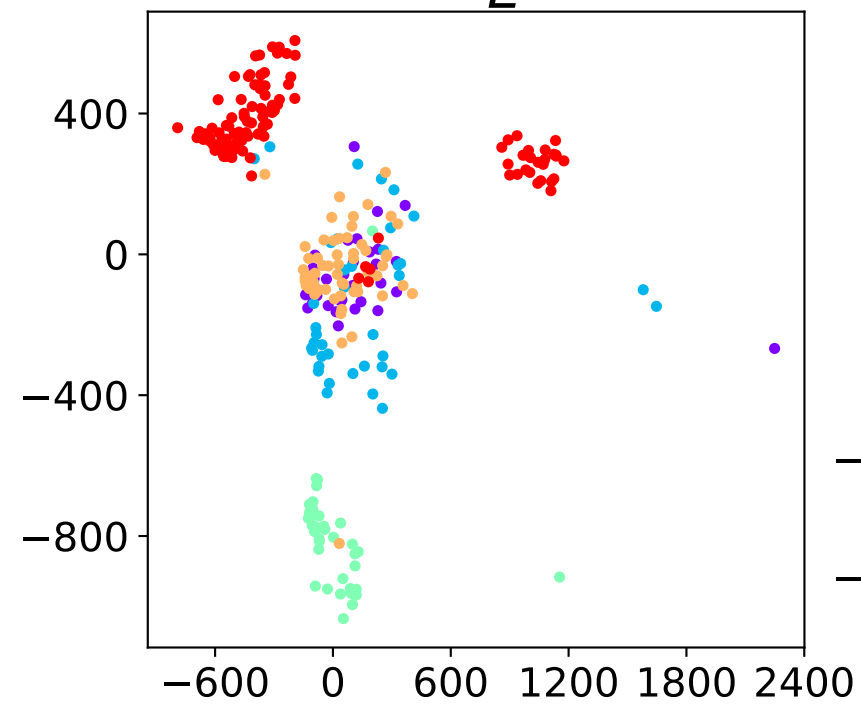 $D_r$ 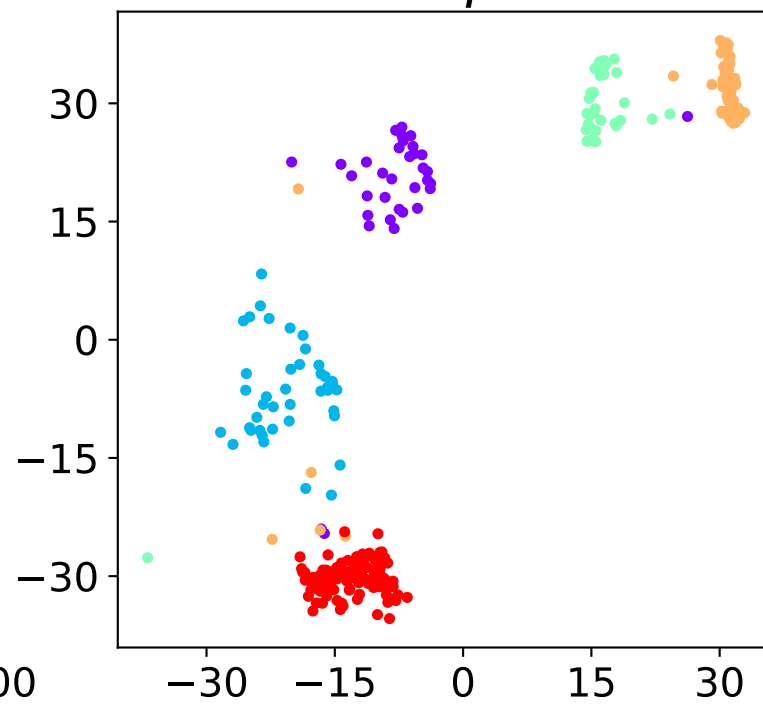 $D_{\text{asin}}$ 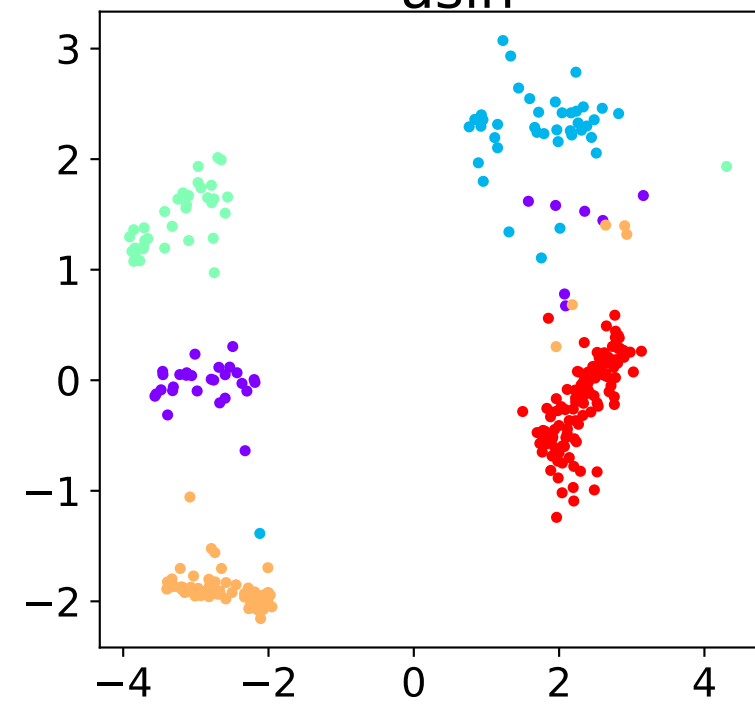 $D_{\text{log}}$ 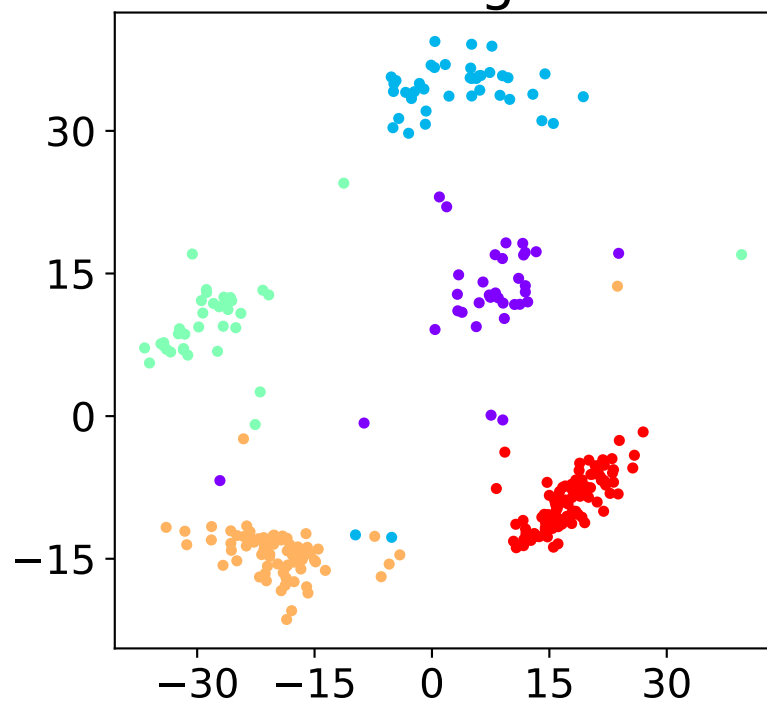 $D_P$ 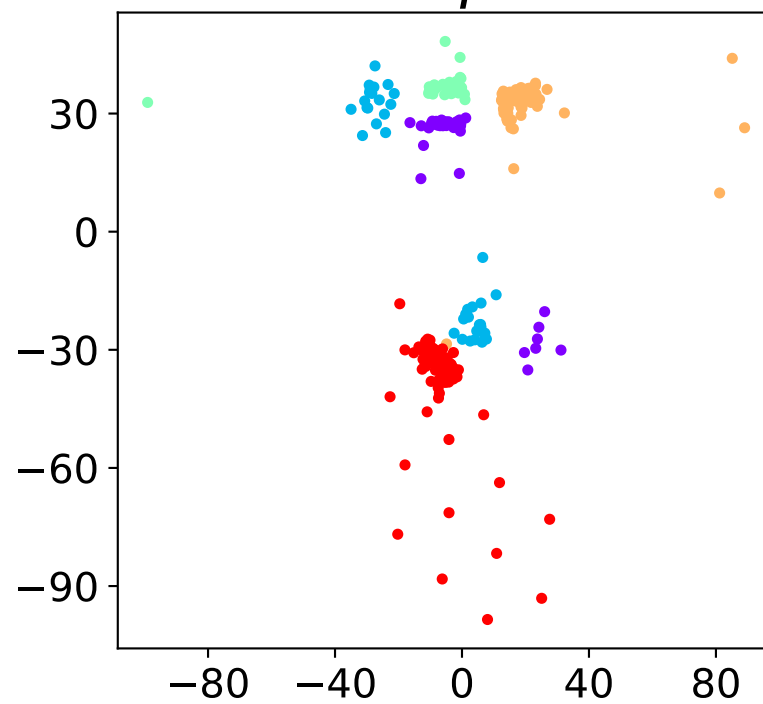 $D_{NB}$ 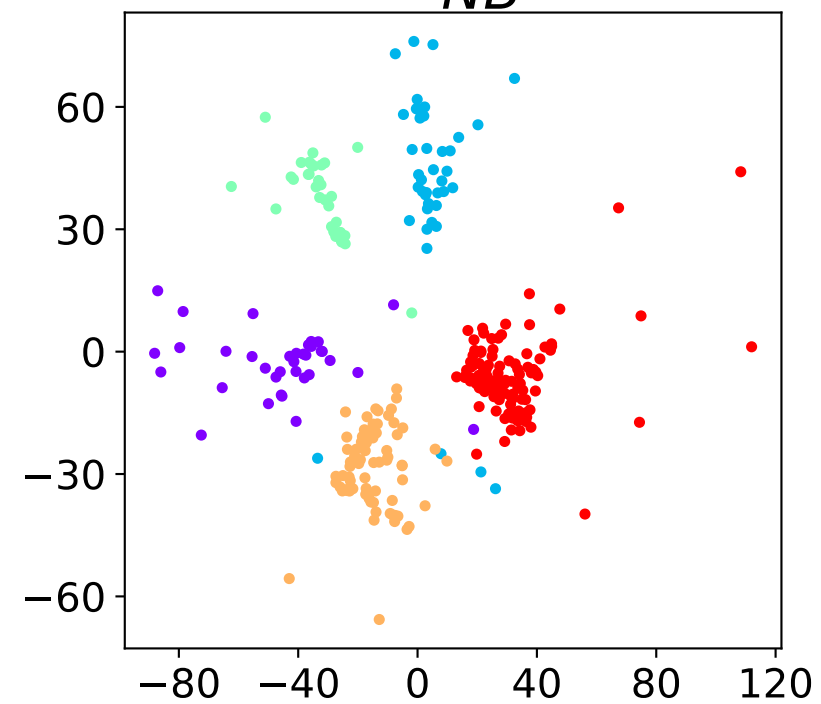

Supplement: supplementary_material [file attachment]

$D_E$ 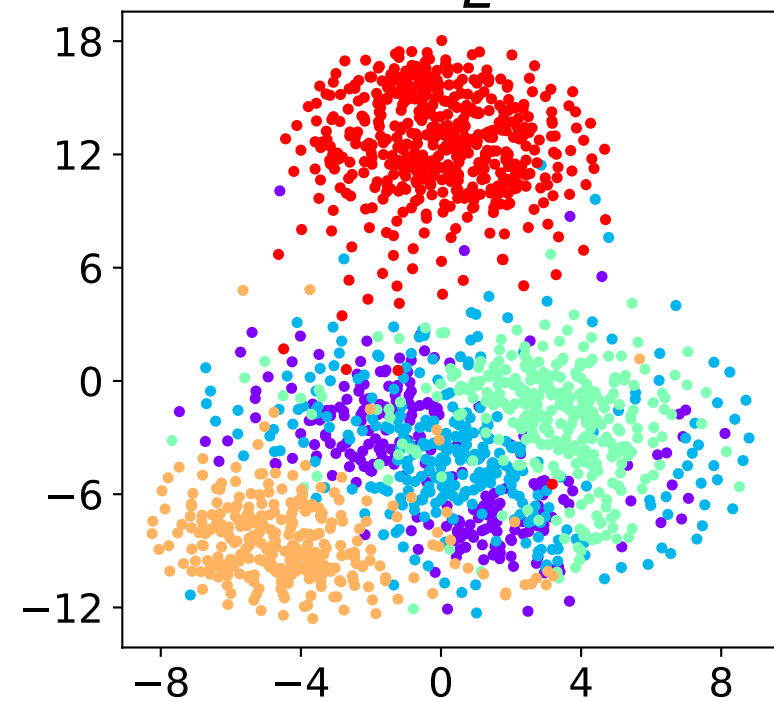 $D_r$ 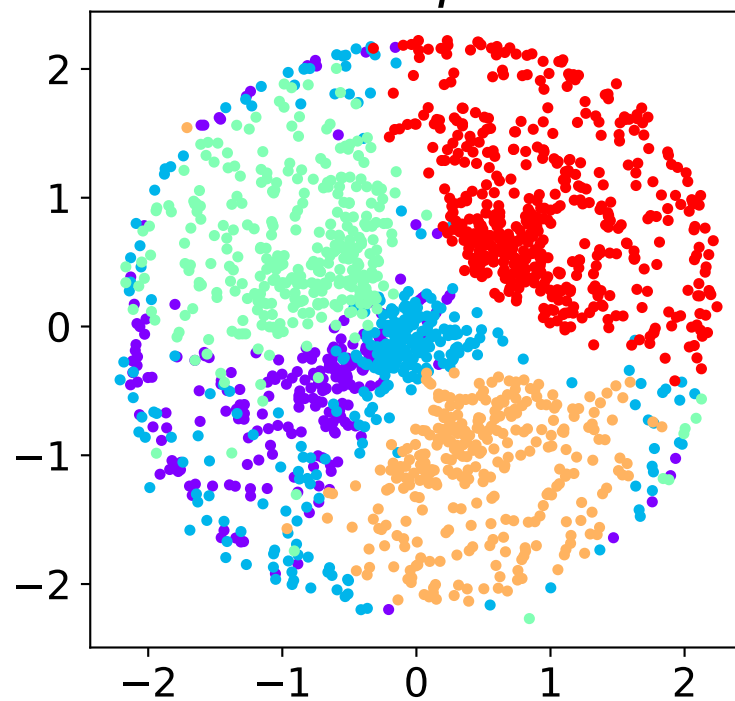 $D_{\text{asin}}$ 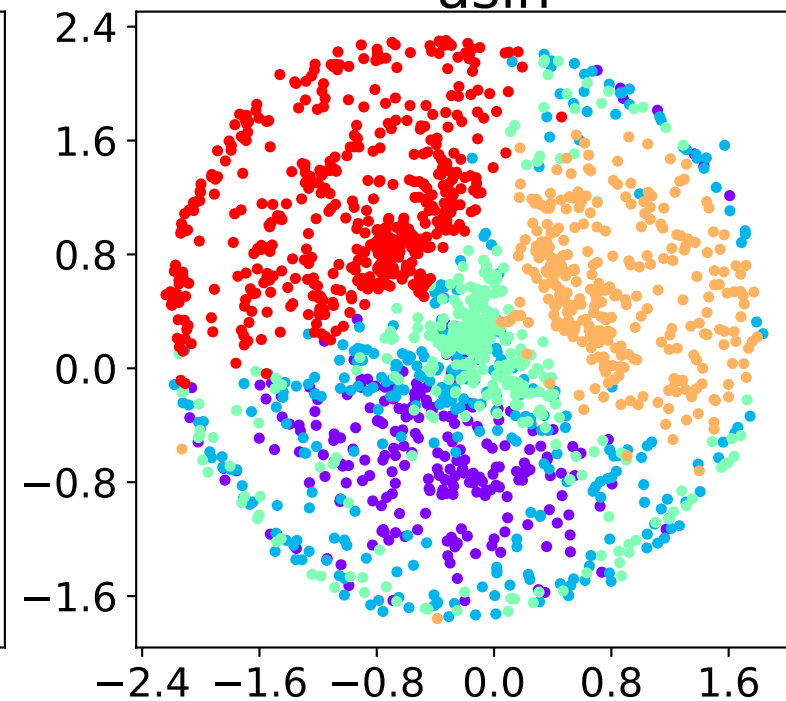 $D_{\text{log}}$ 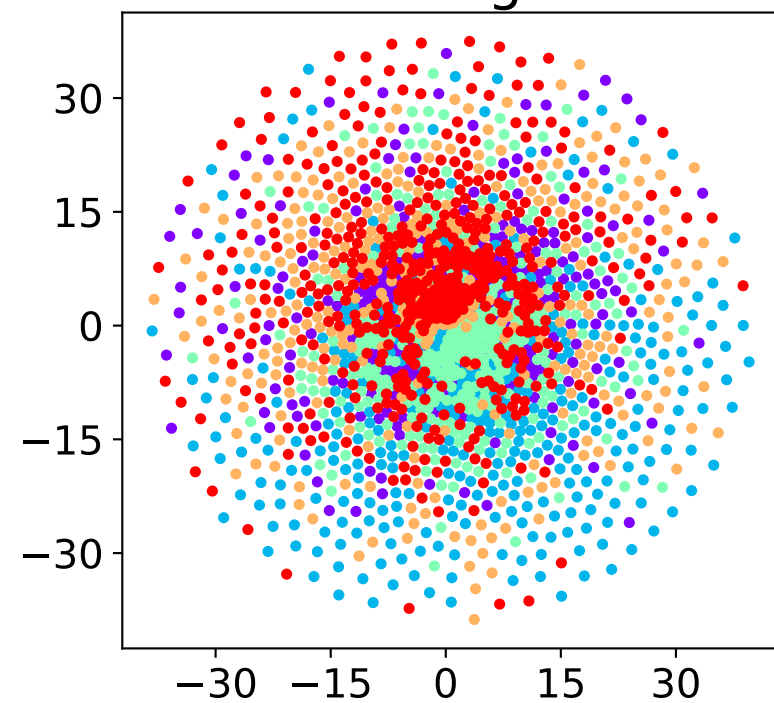 $D_\rho$ 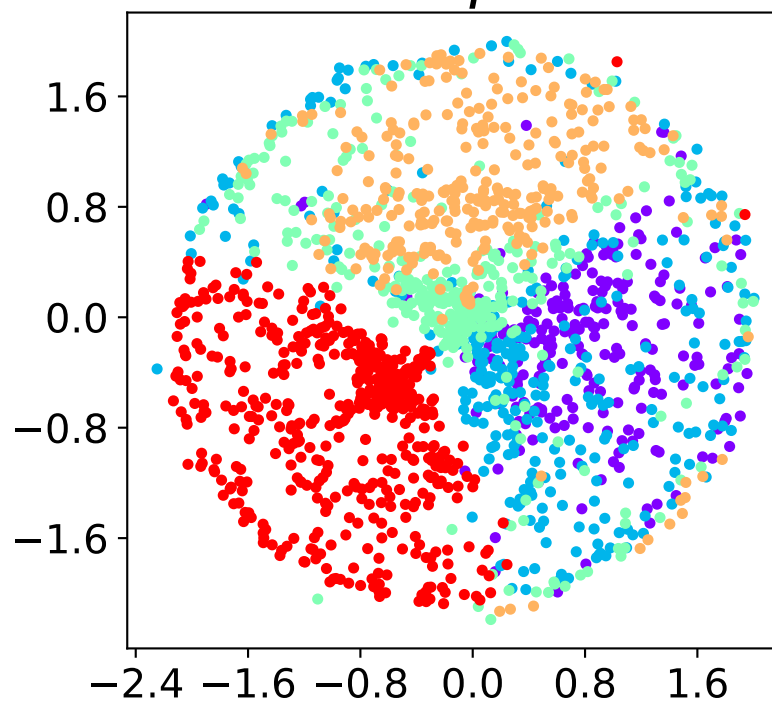 $D_{NB}$ 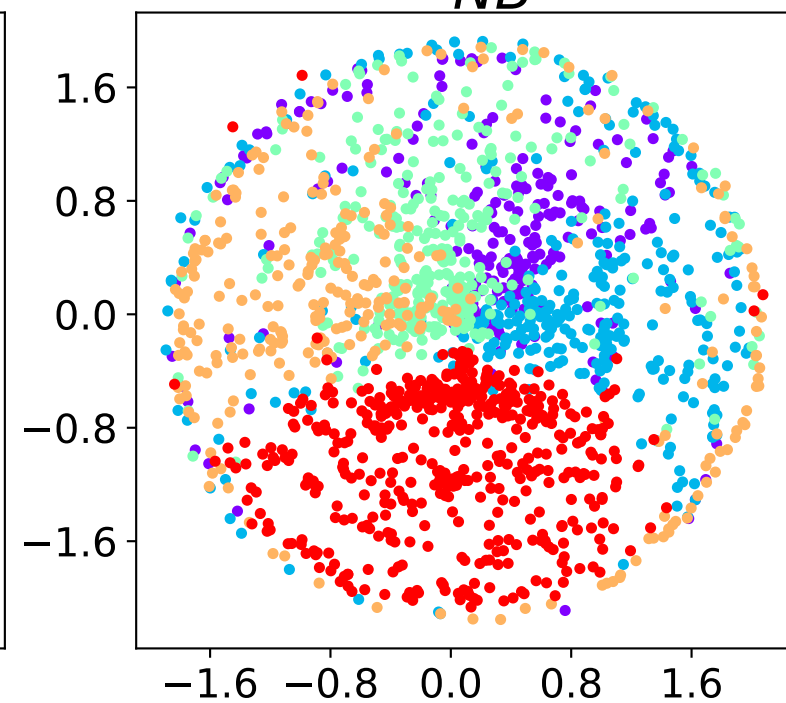

Supplement: supplementary_material [file attachment]

GPCA-P

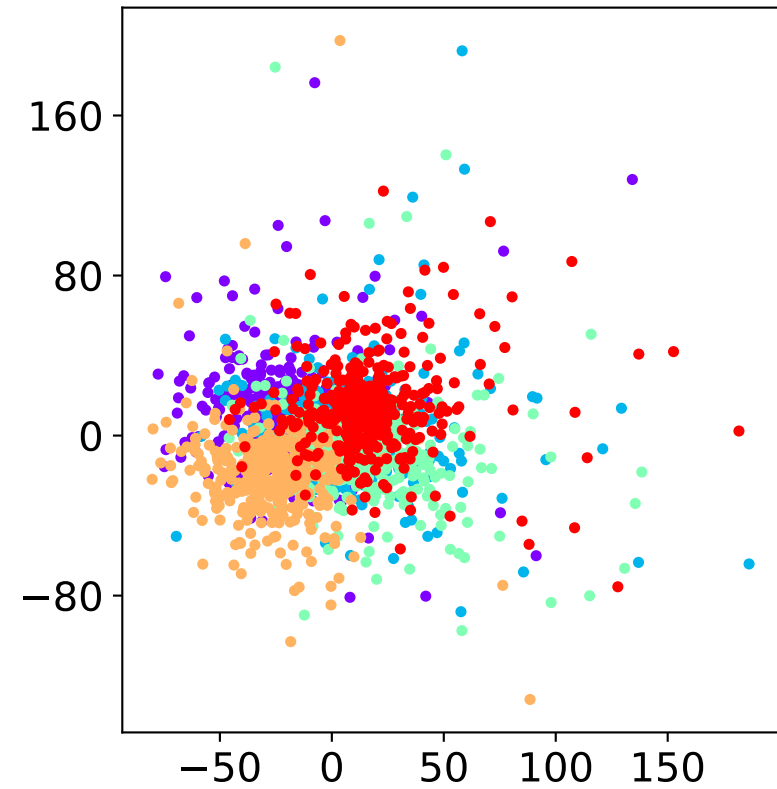

GPCA-NB

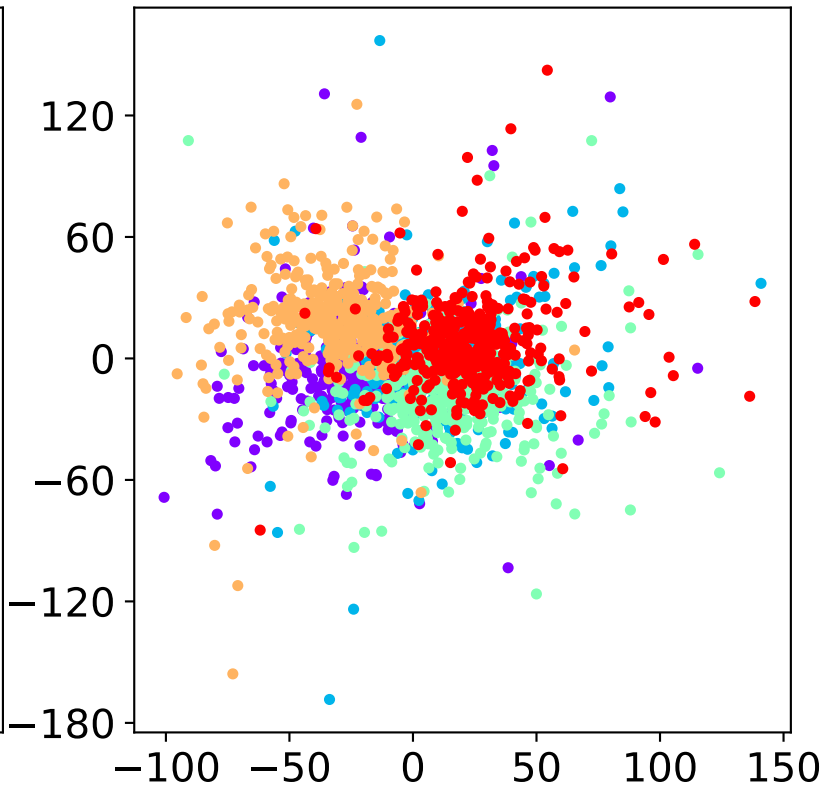

NMF

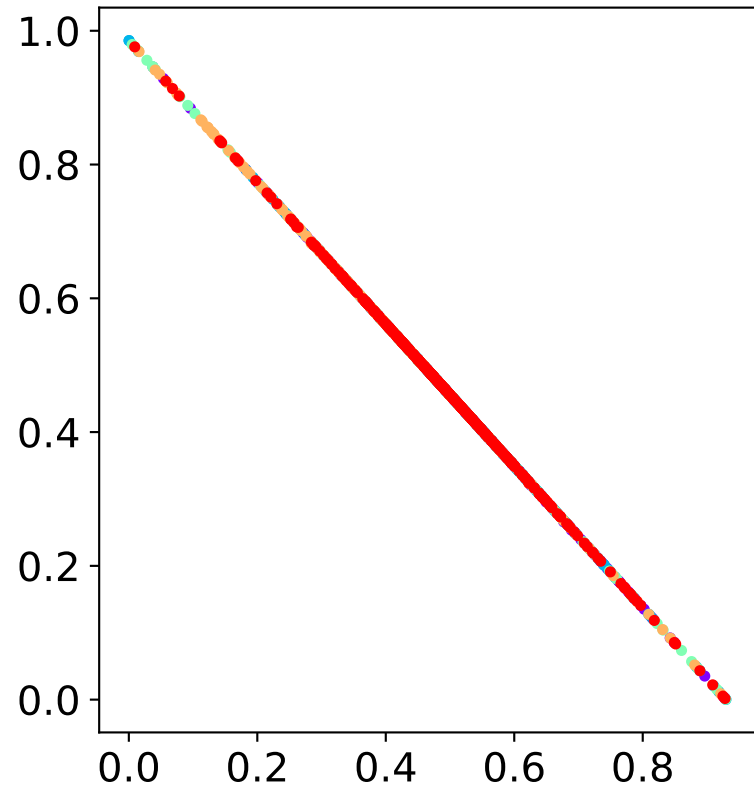

Supplement: supplementary_material [file attachment]

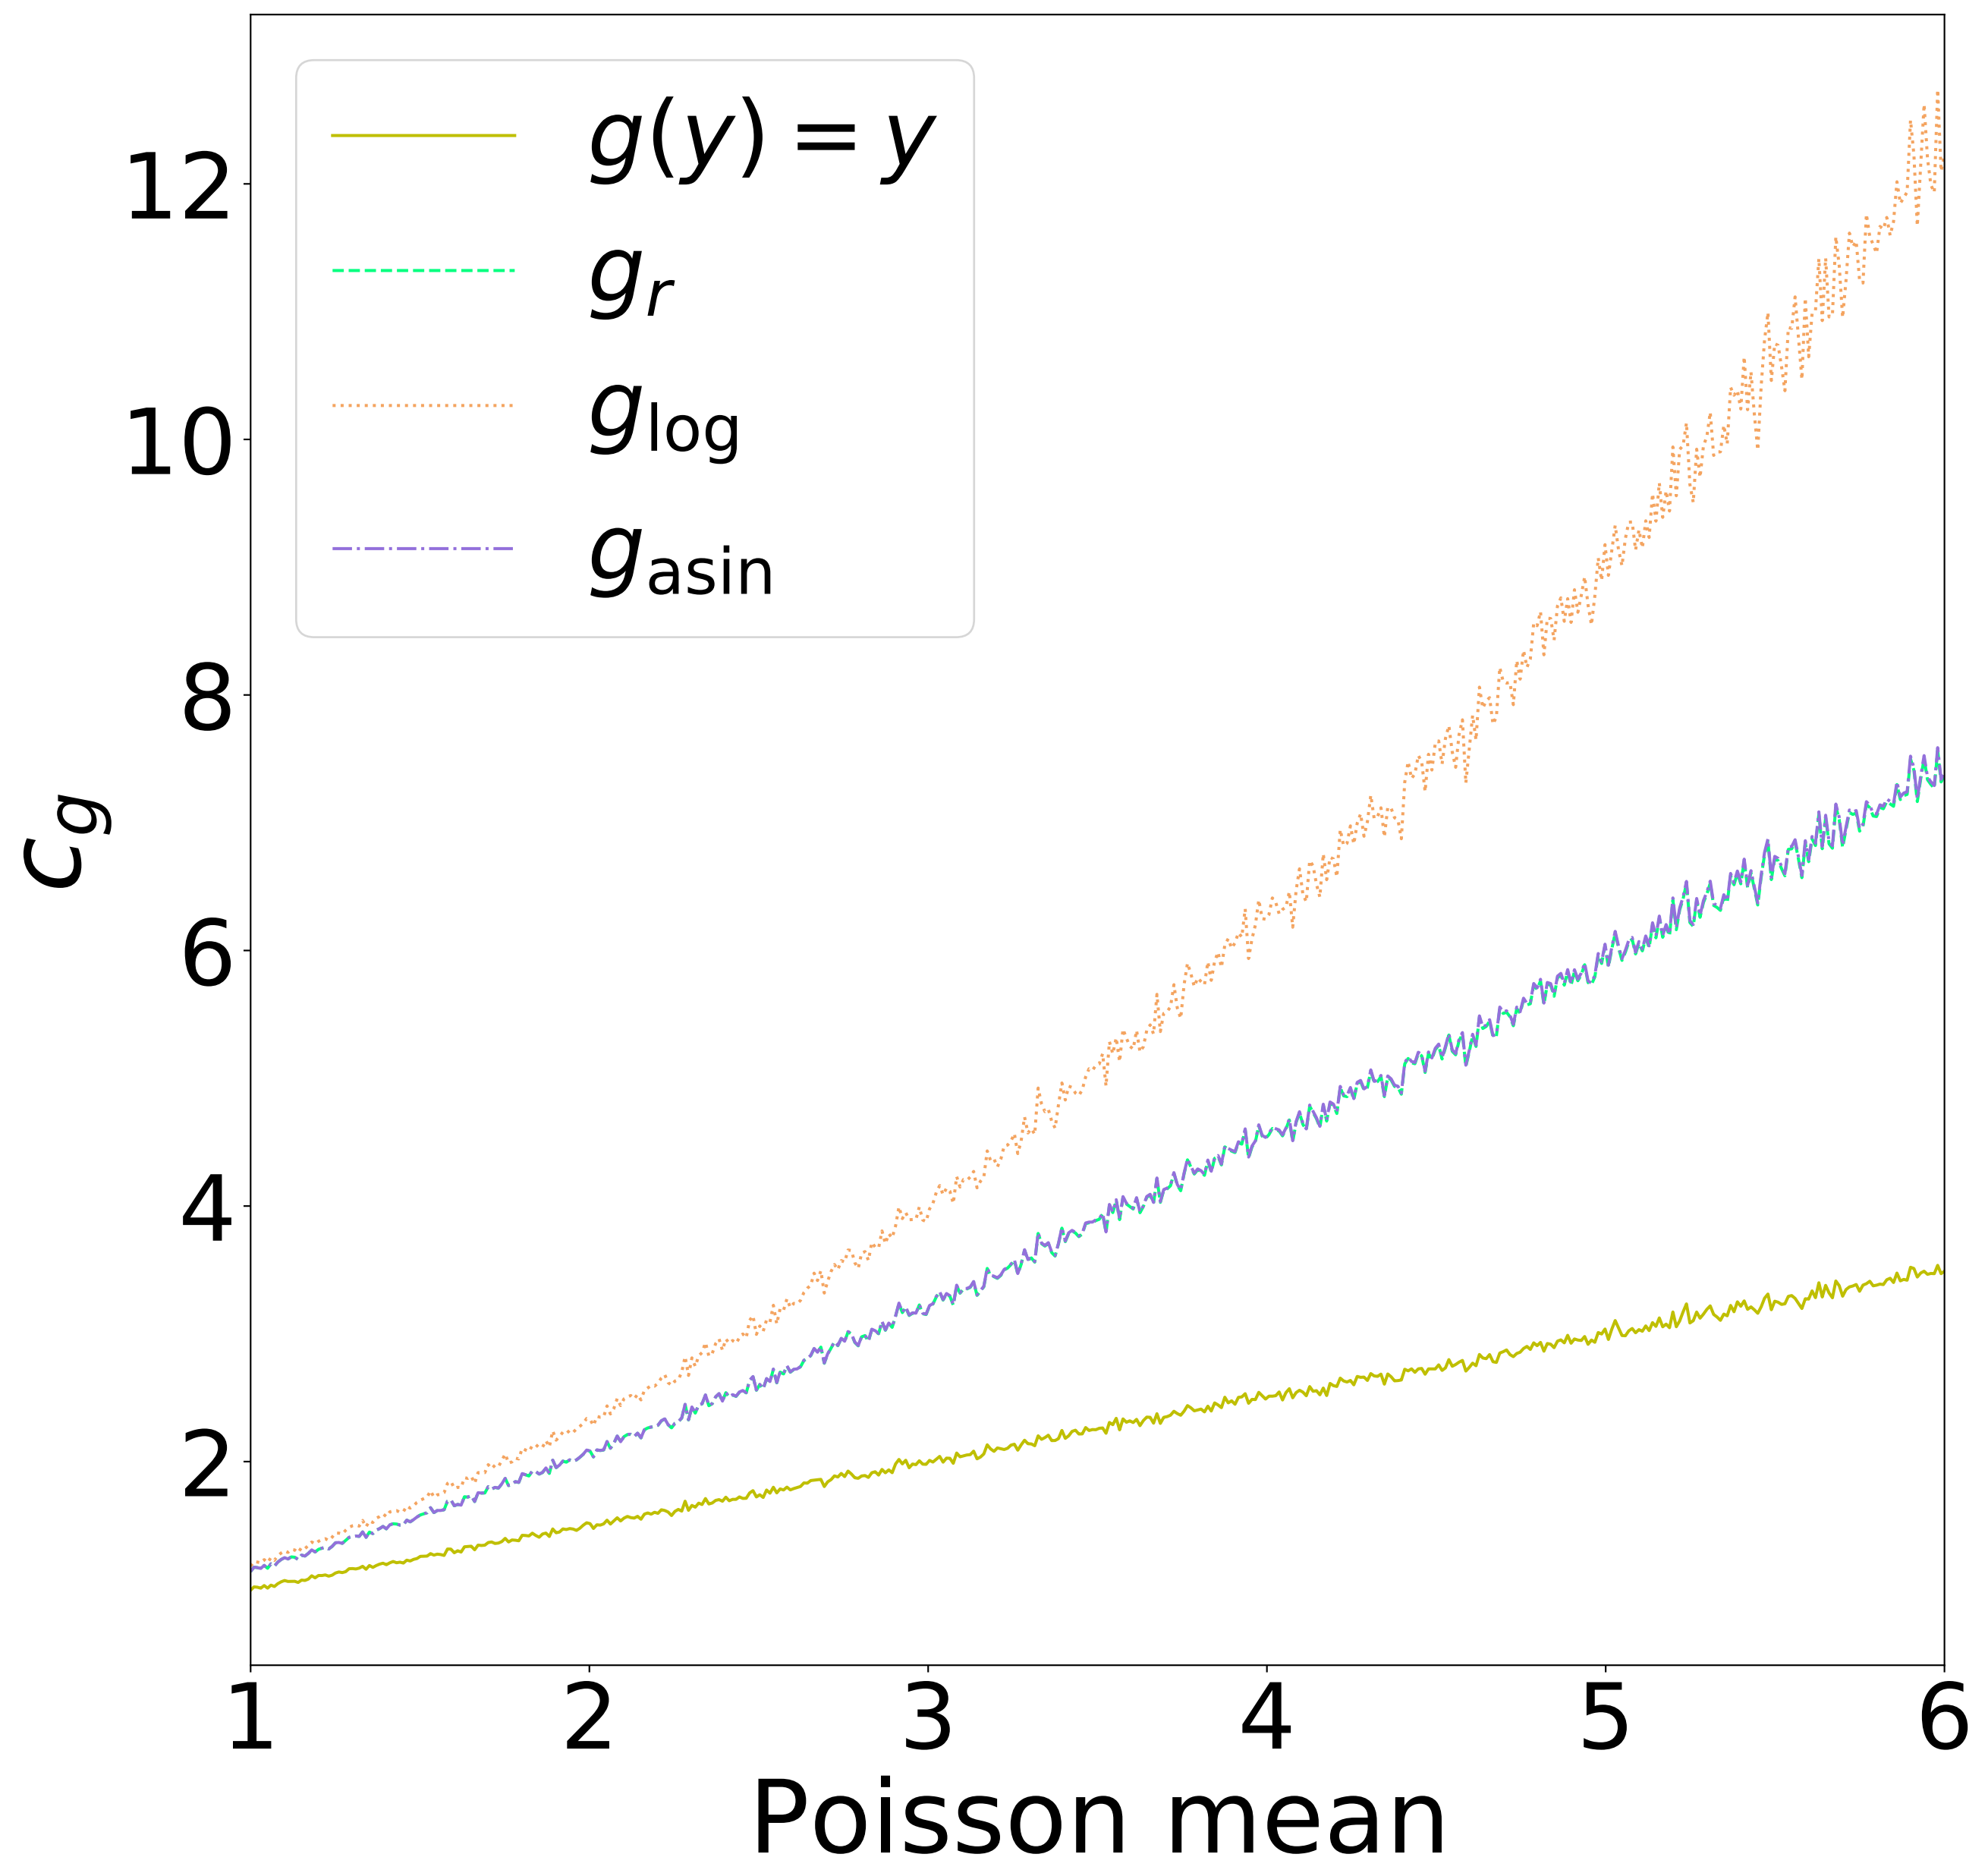

Supplement: supplementary_material [file attachment]

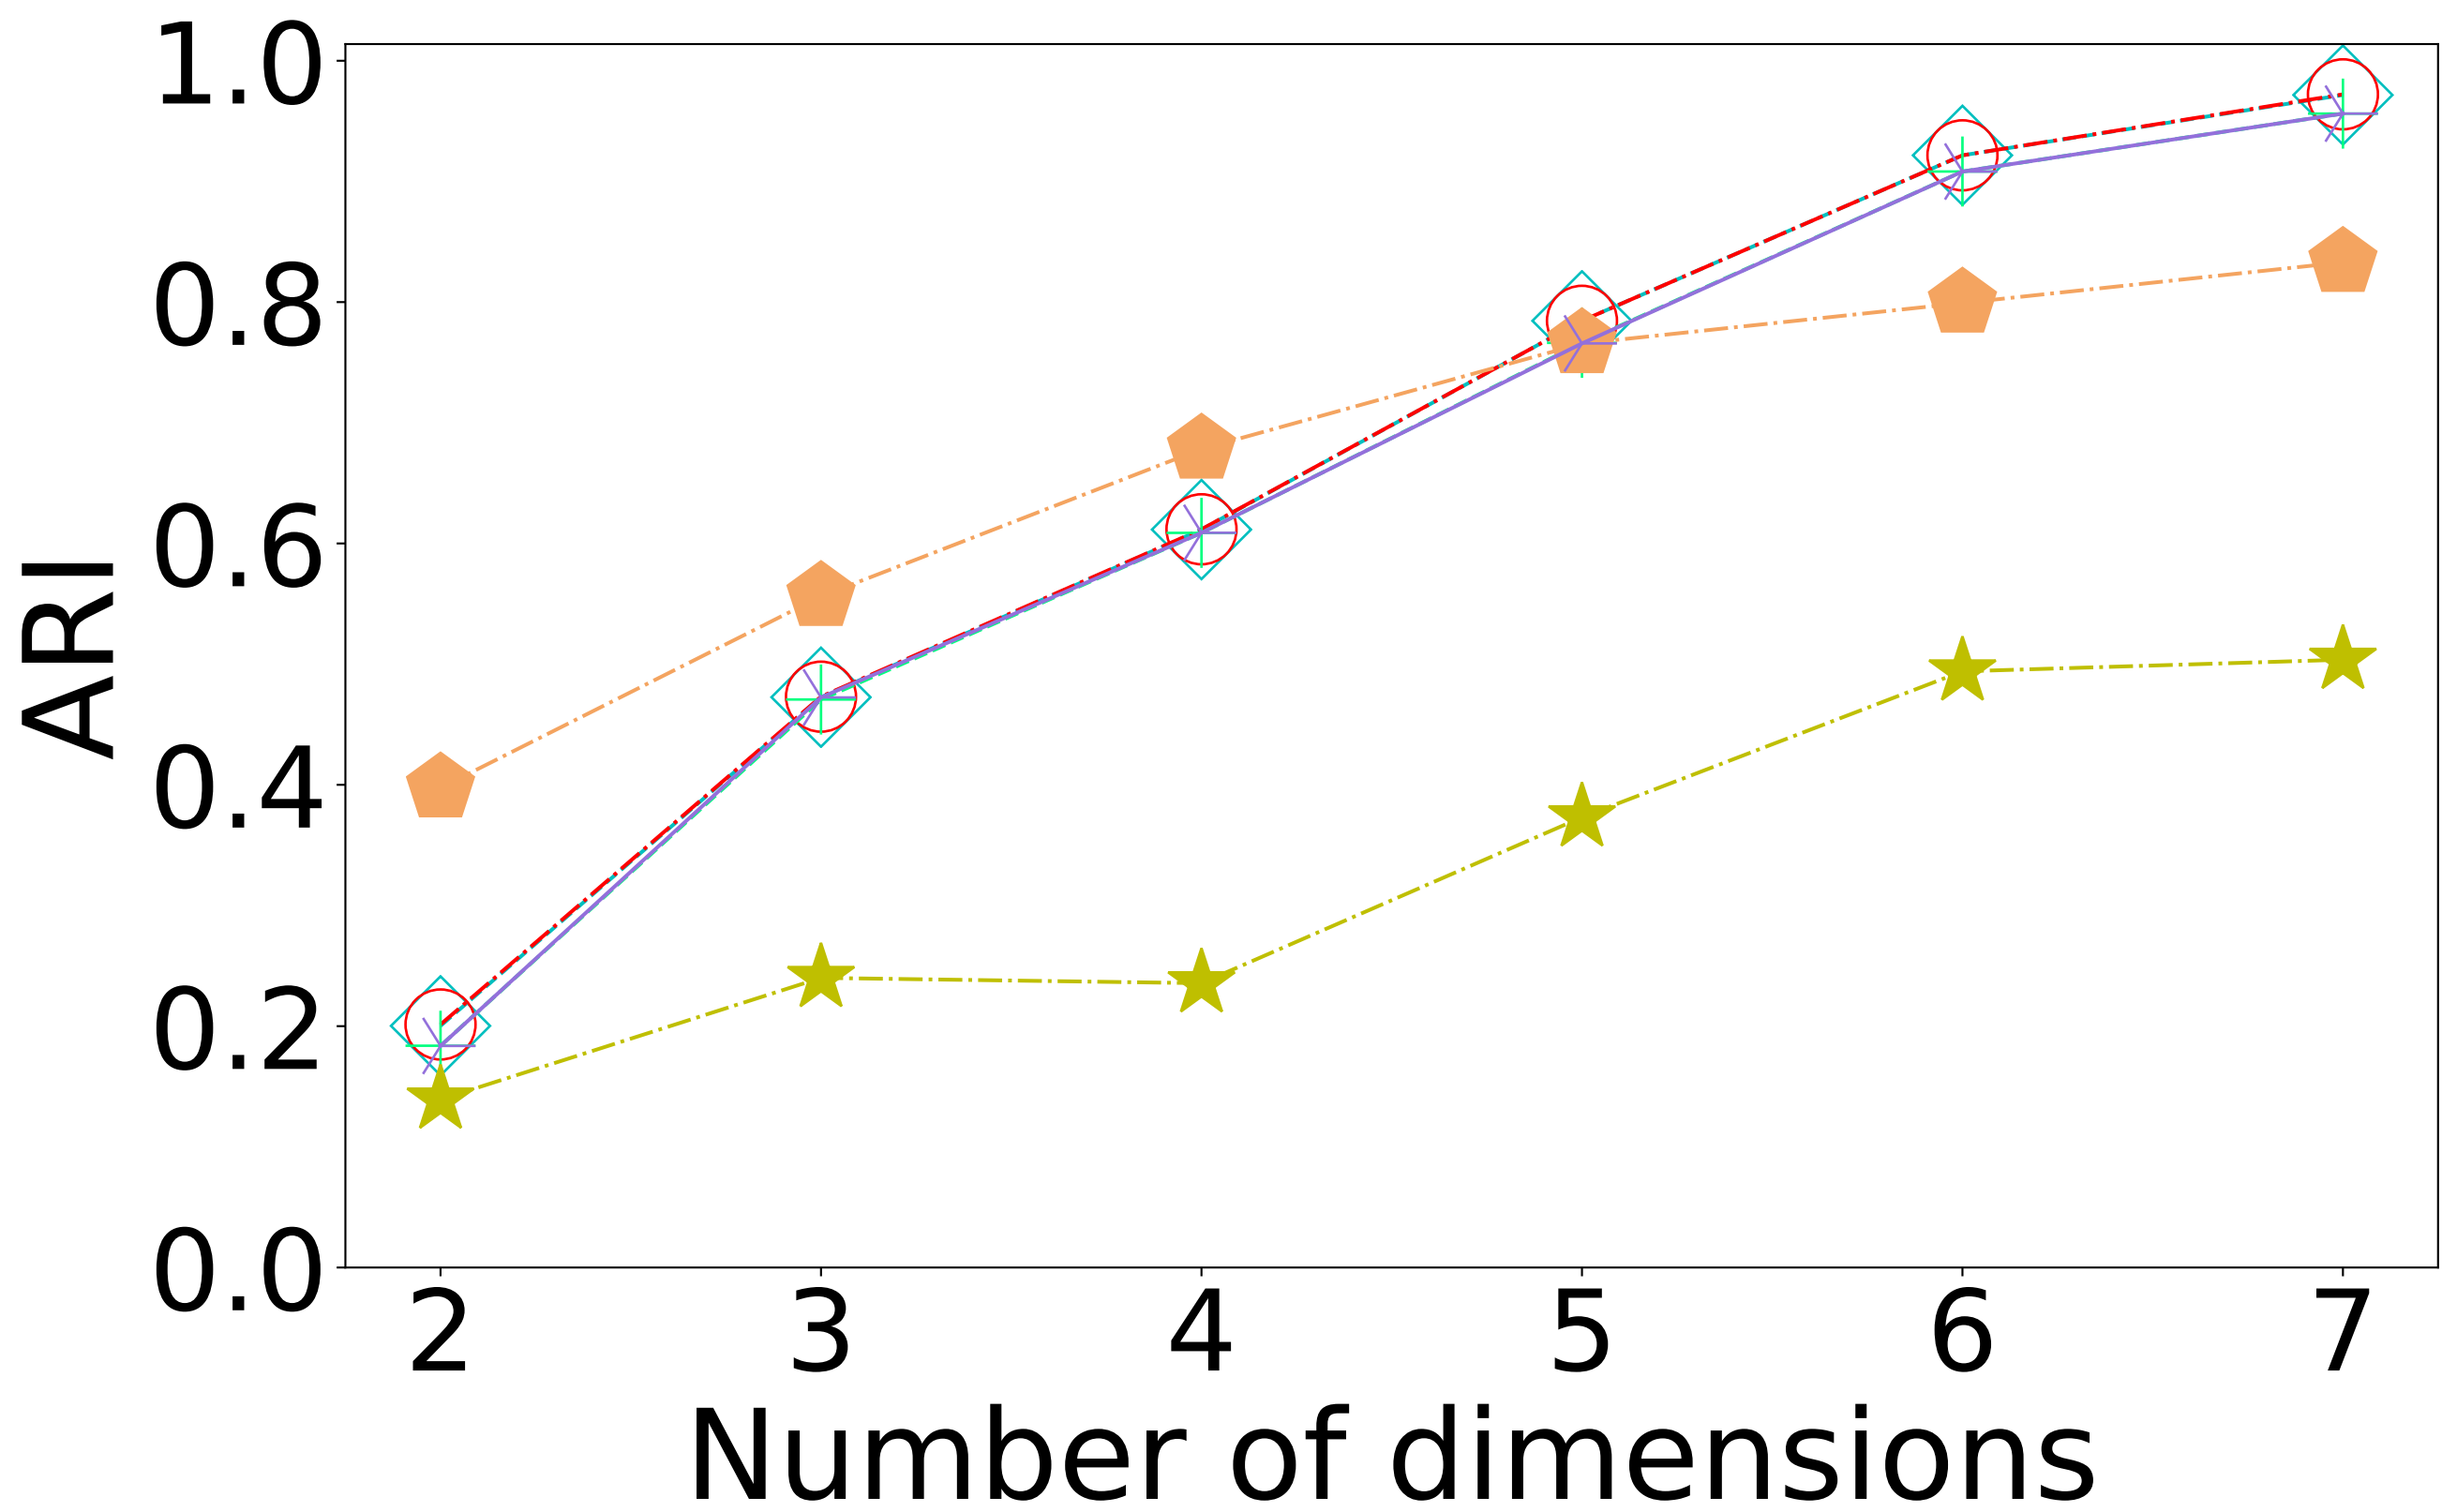

Supplement: supplementary_material [file attachment]

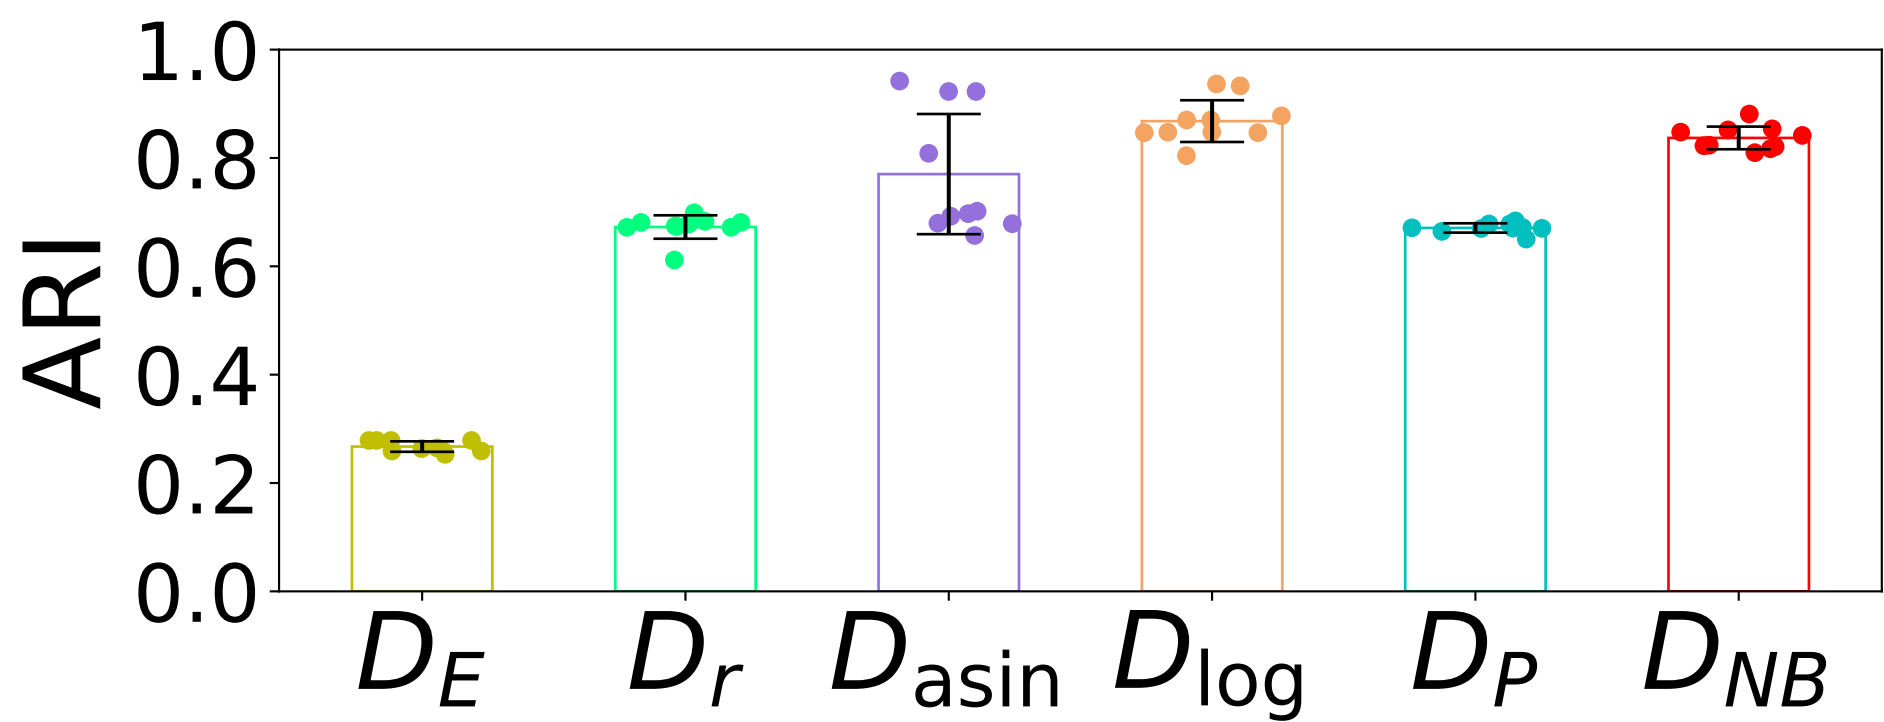

Supplement: supplementary_material [file attachment]

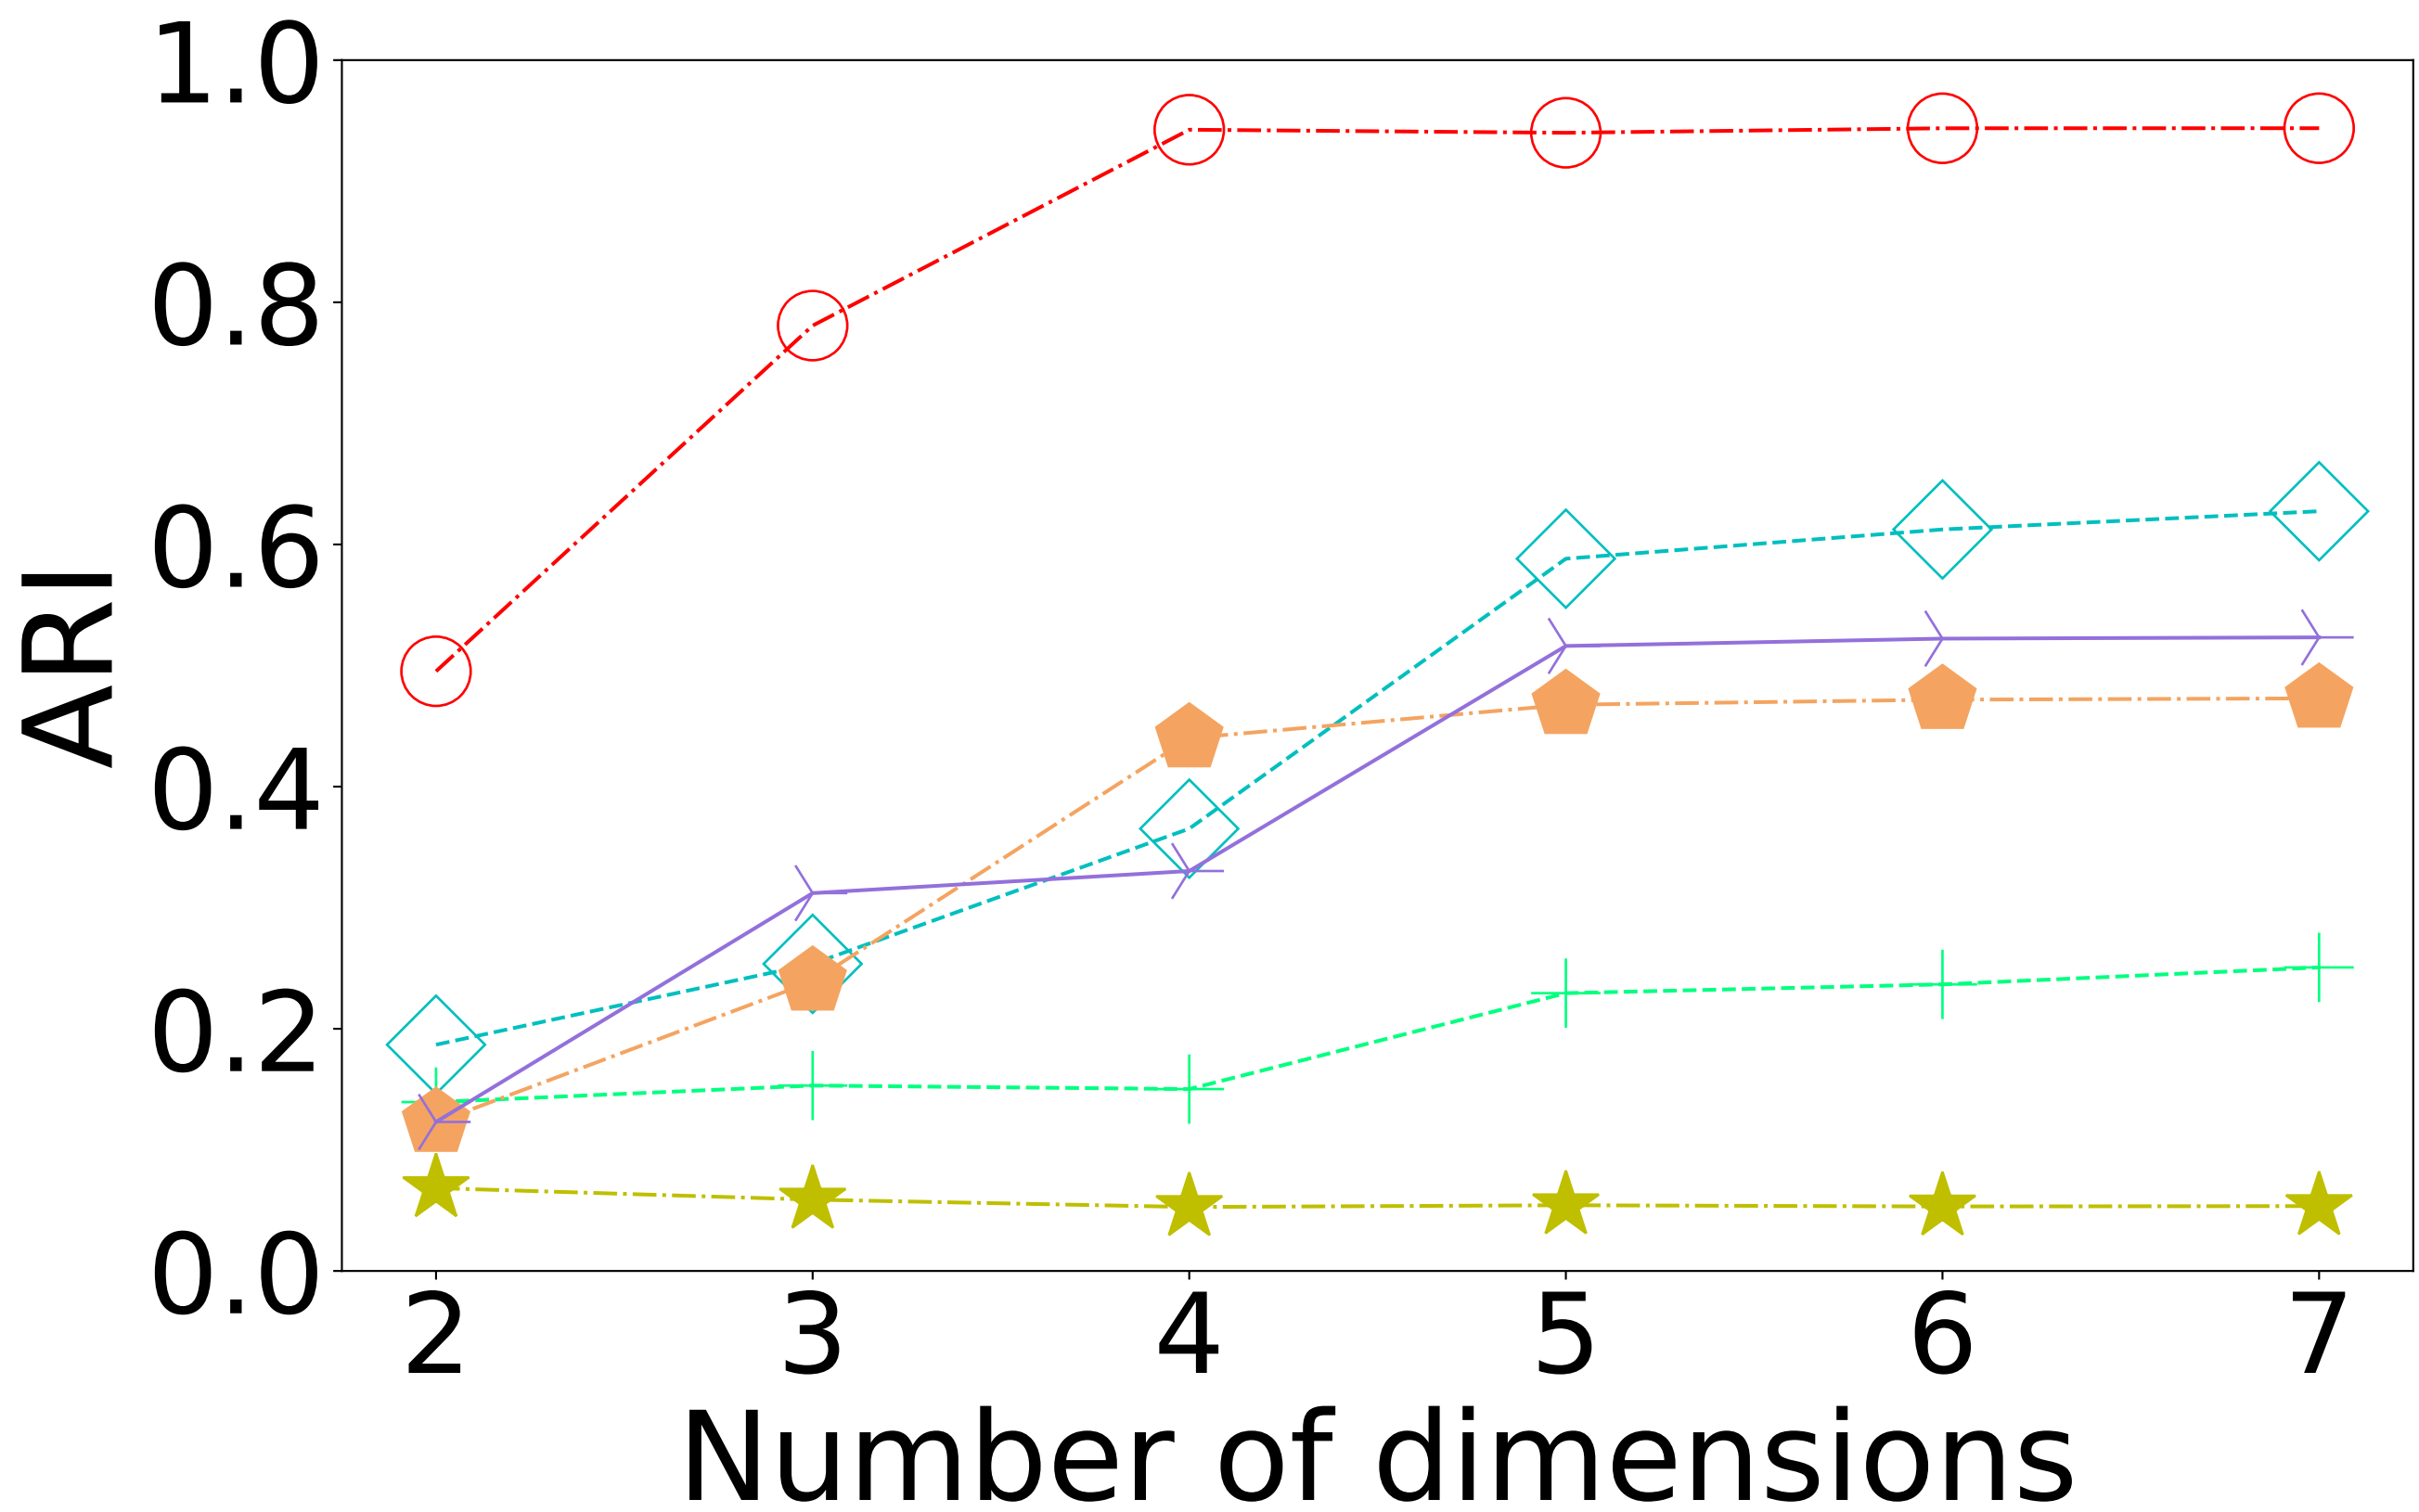

Supplement: supplementary_material [file attachment]

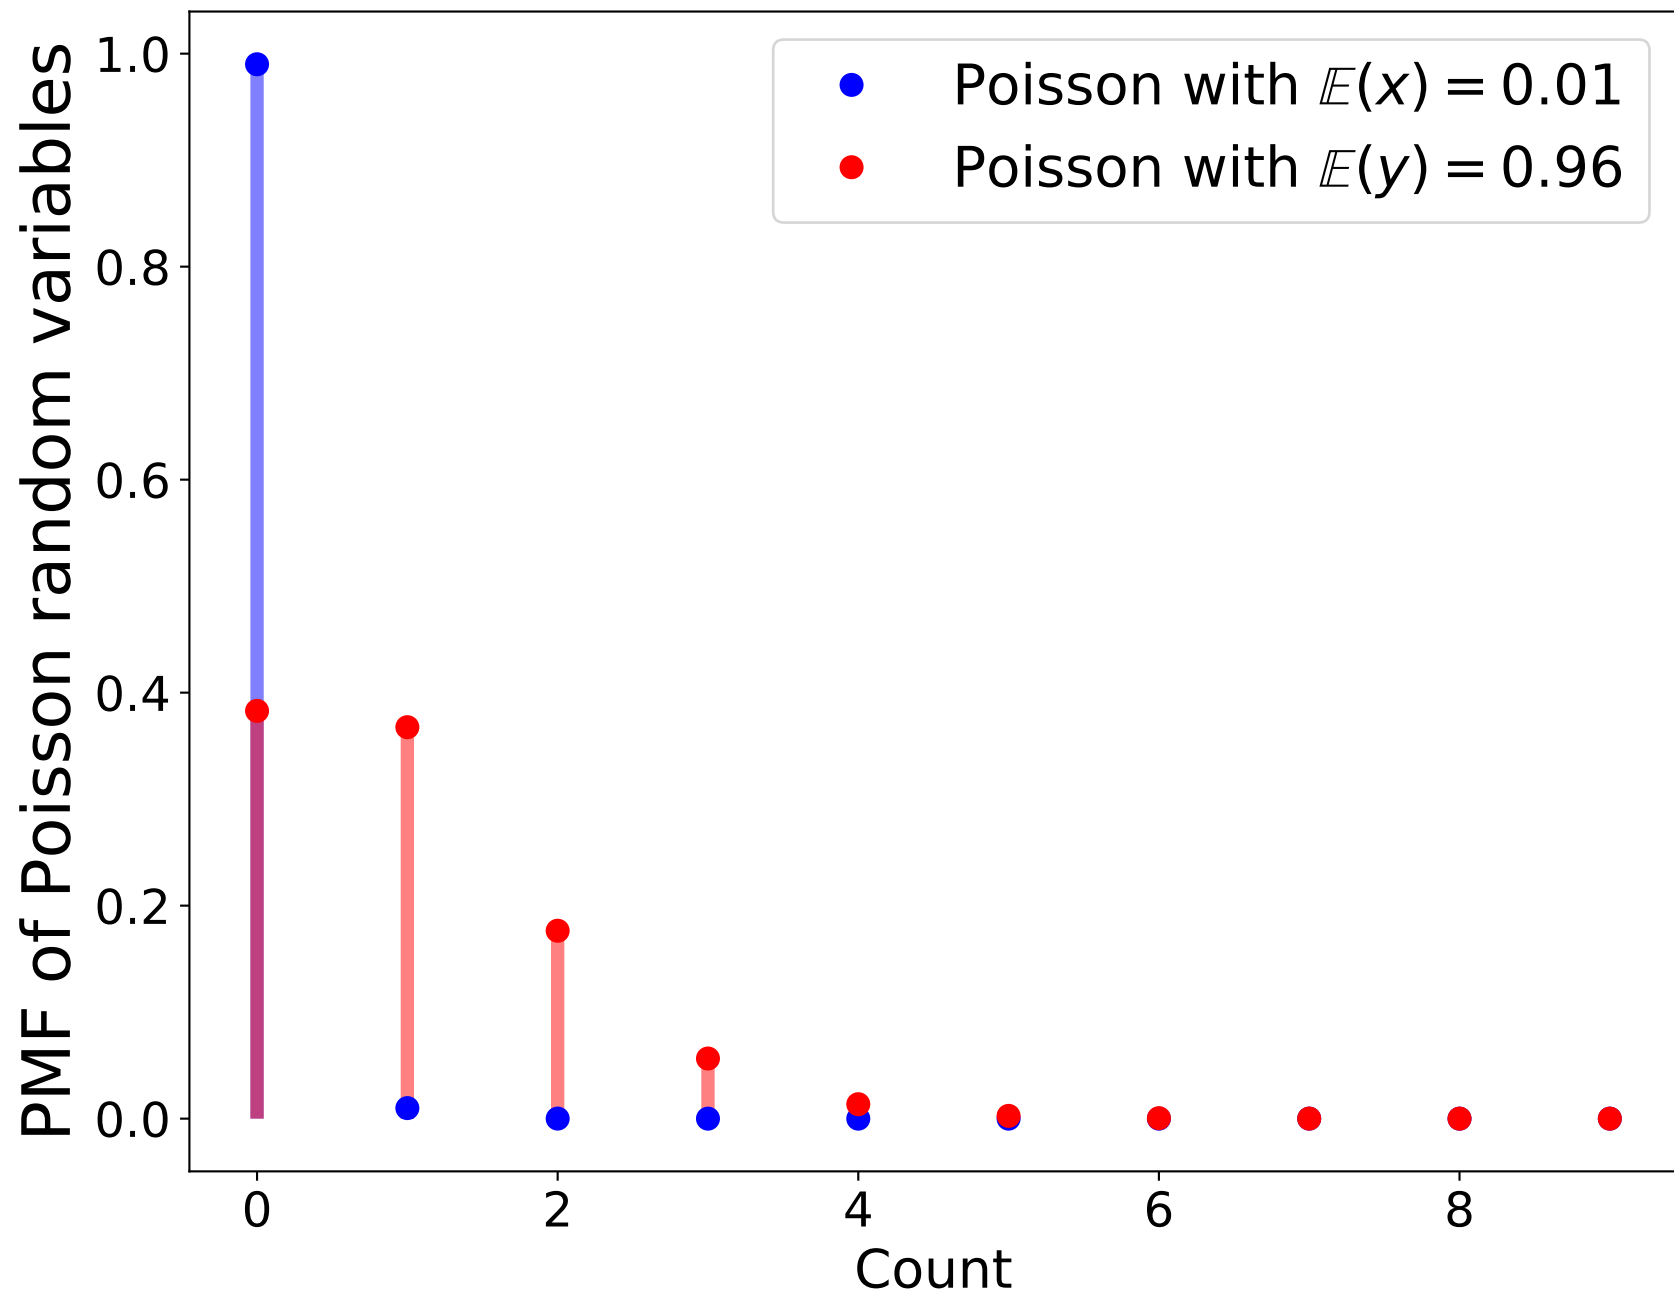

Supplement: supplementary_material [file attachment]

$D_E$ 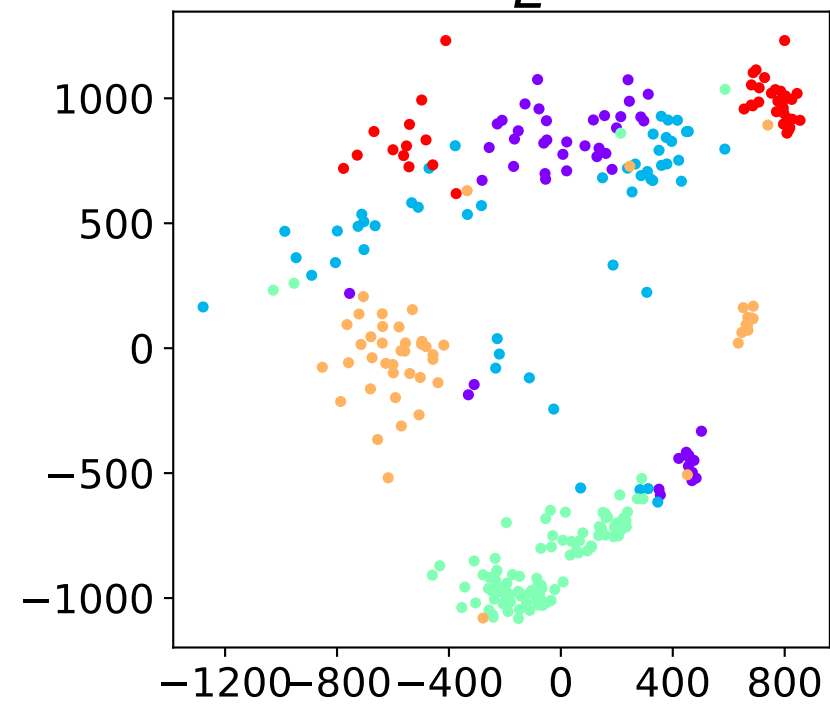 $D_r$ 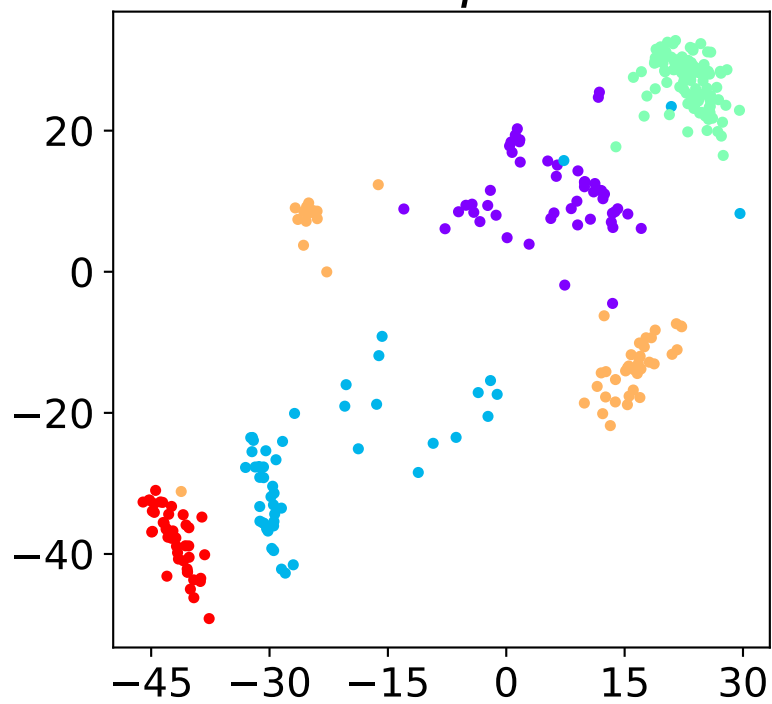 $D_{\text{asin}}$ 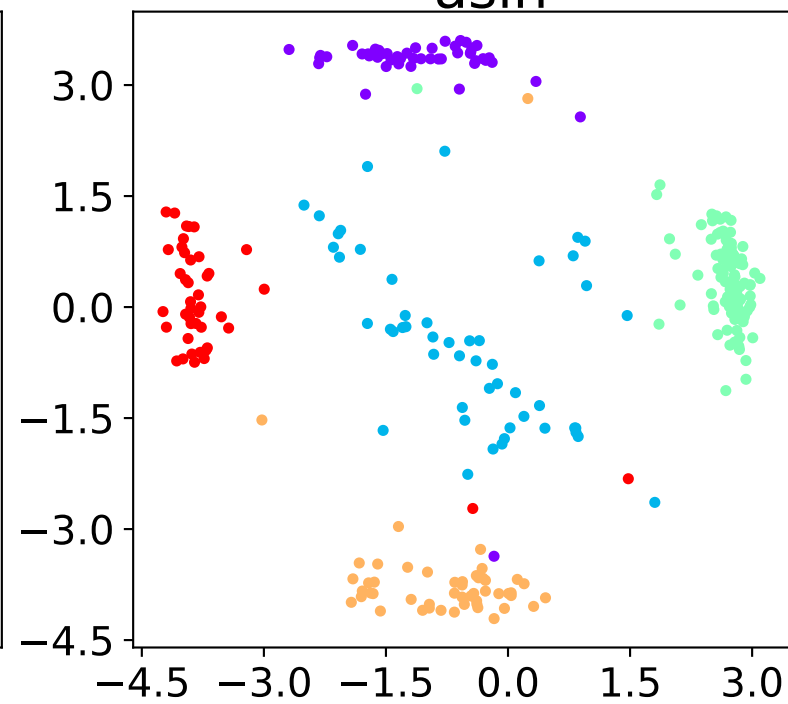 $D_{\log}$ 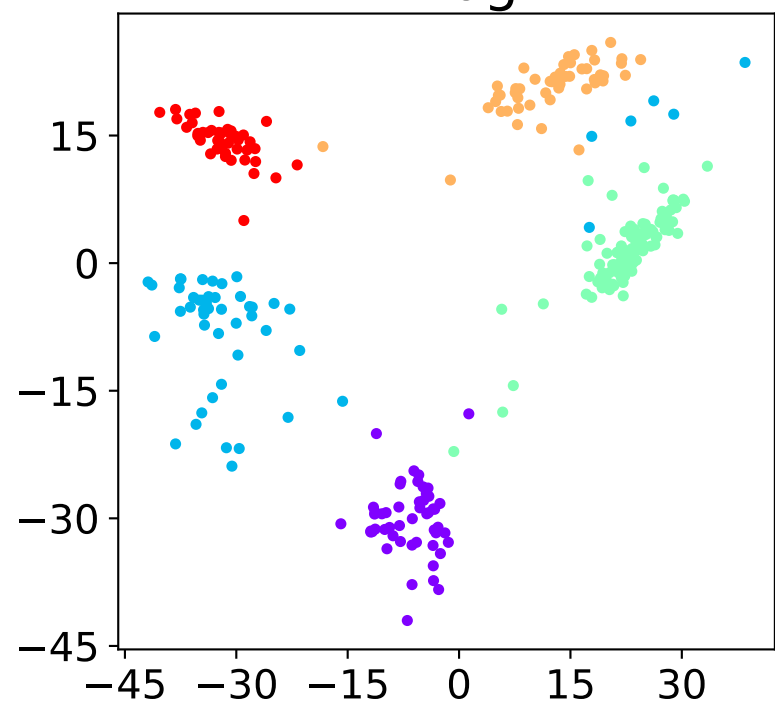 $D_P$ 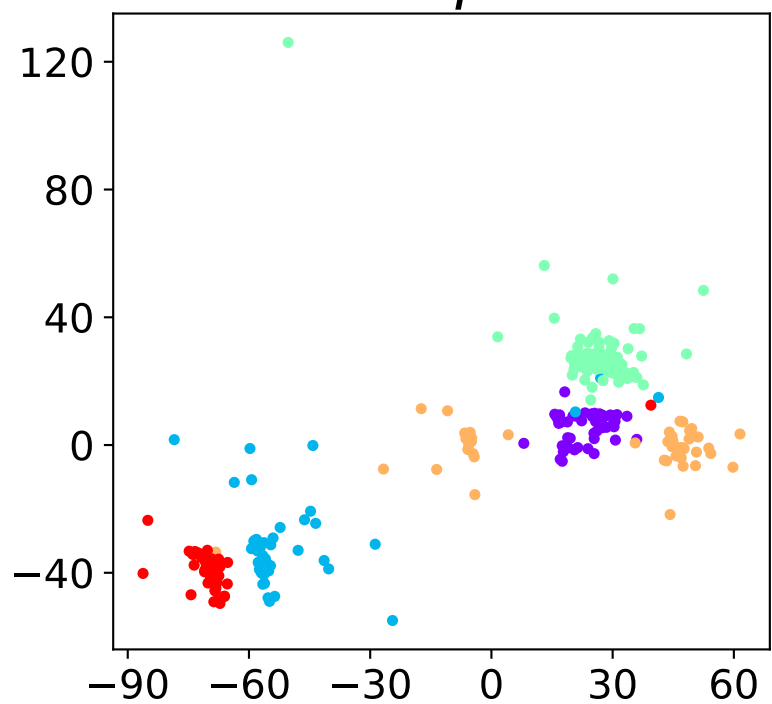 $D_{NB}$ 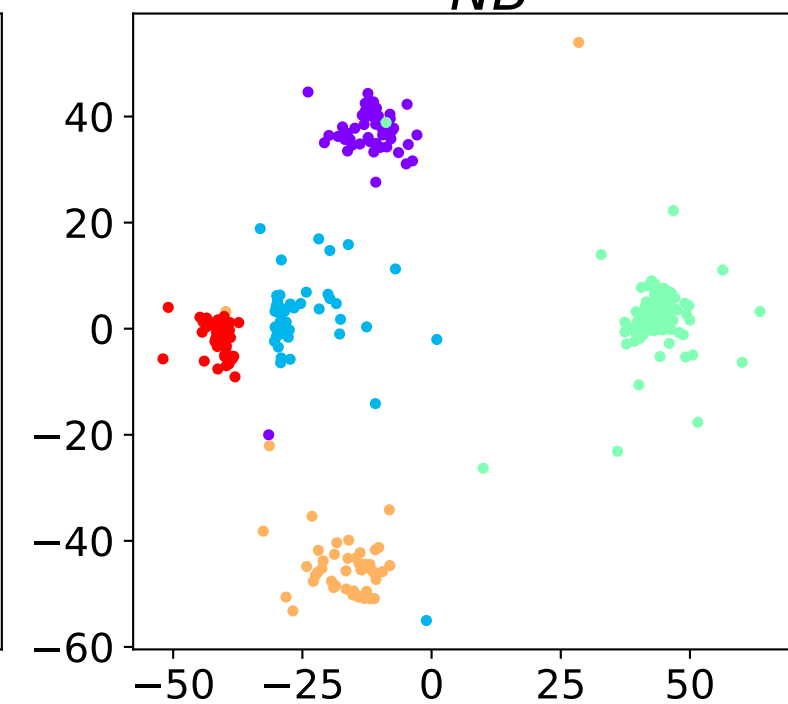

Supplement: supplementary_material [file attachment]

$D_E$ 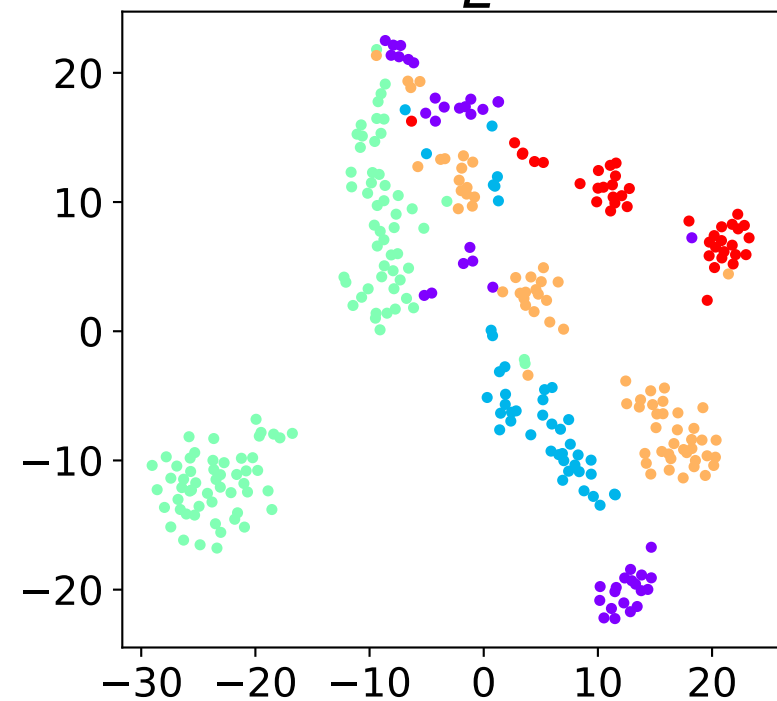 $D_r$ 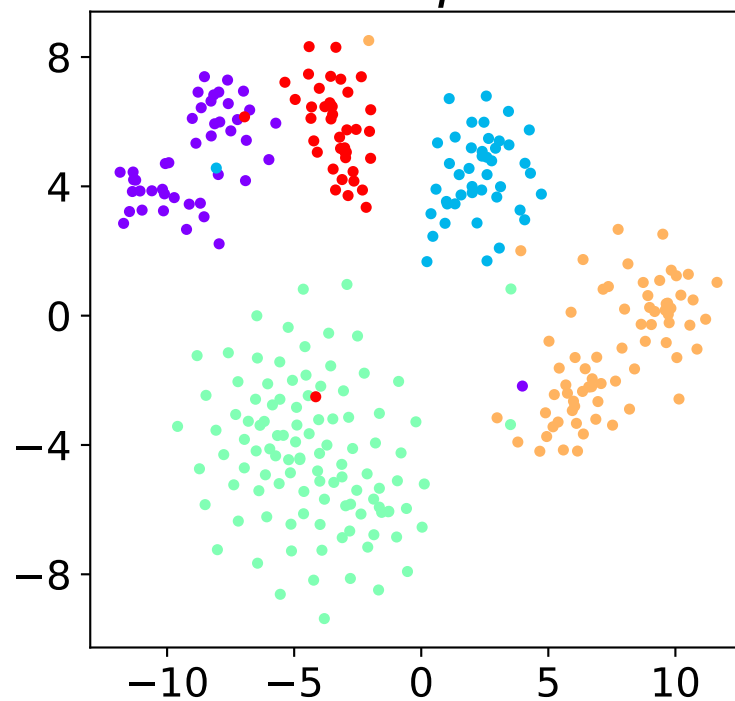 $D_{\text{asin}}$ 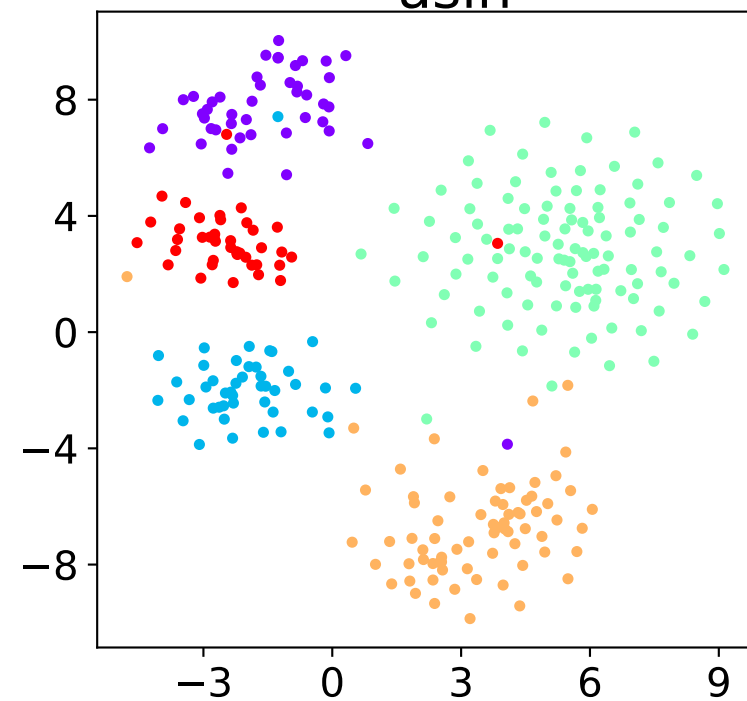 $D_{\text{log}}$ 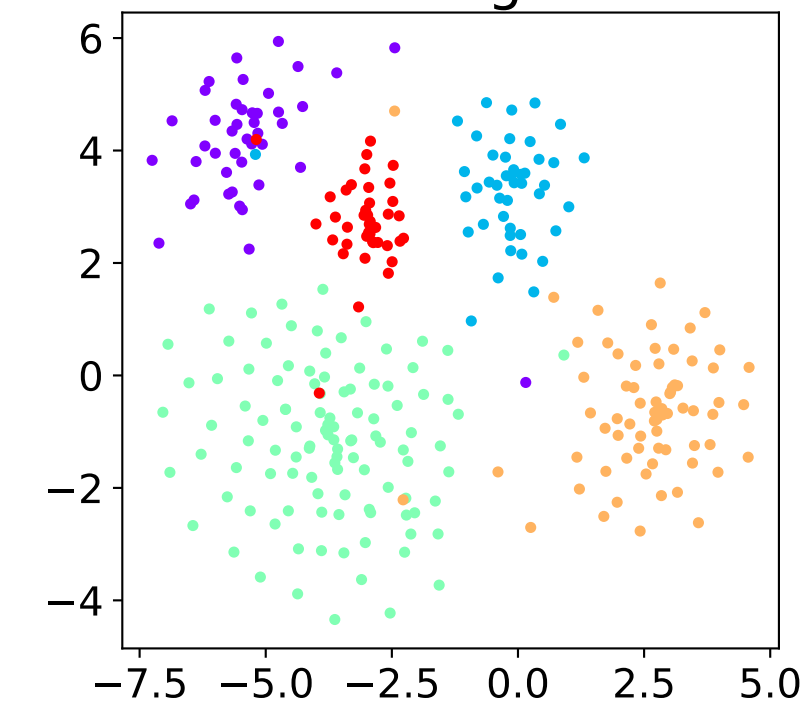 $D_P$ 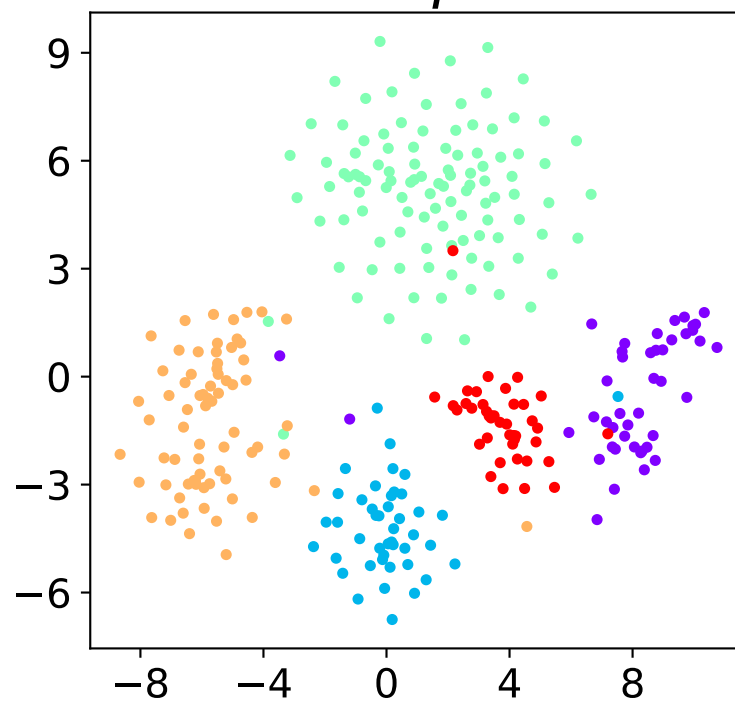 $D_{NB}$ 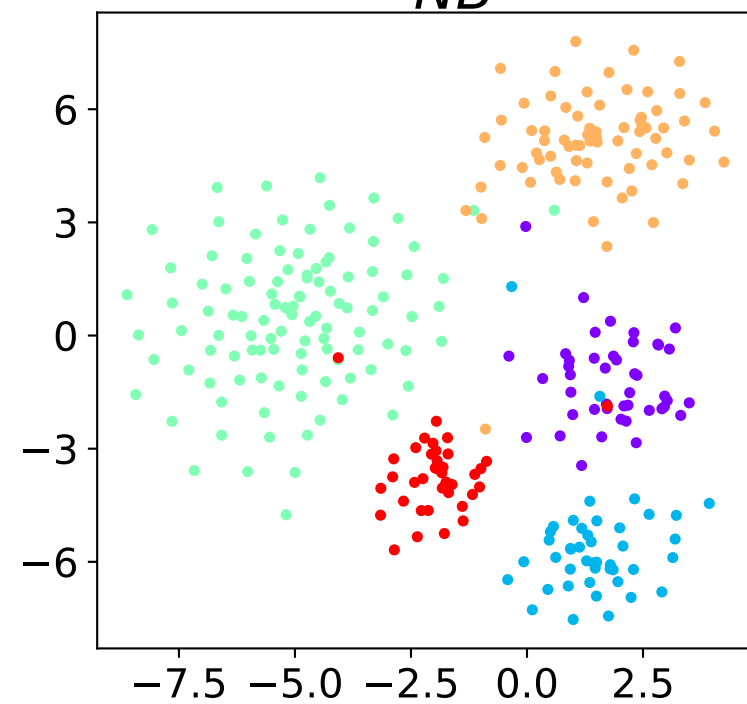

Supplement: supplementary_material [file attachment]

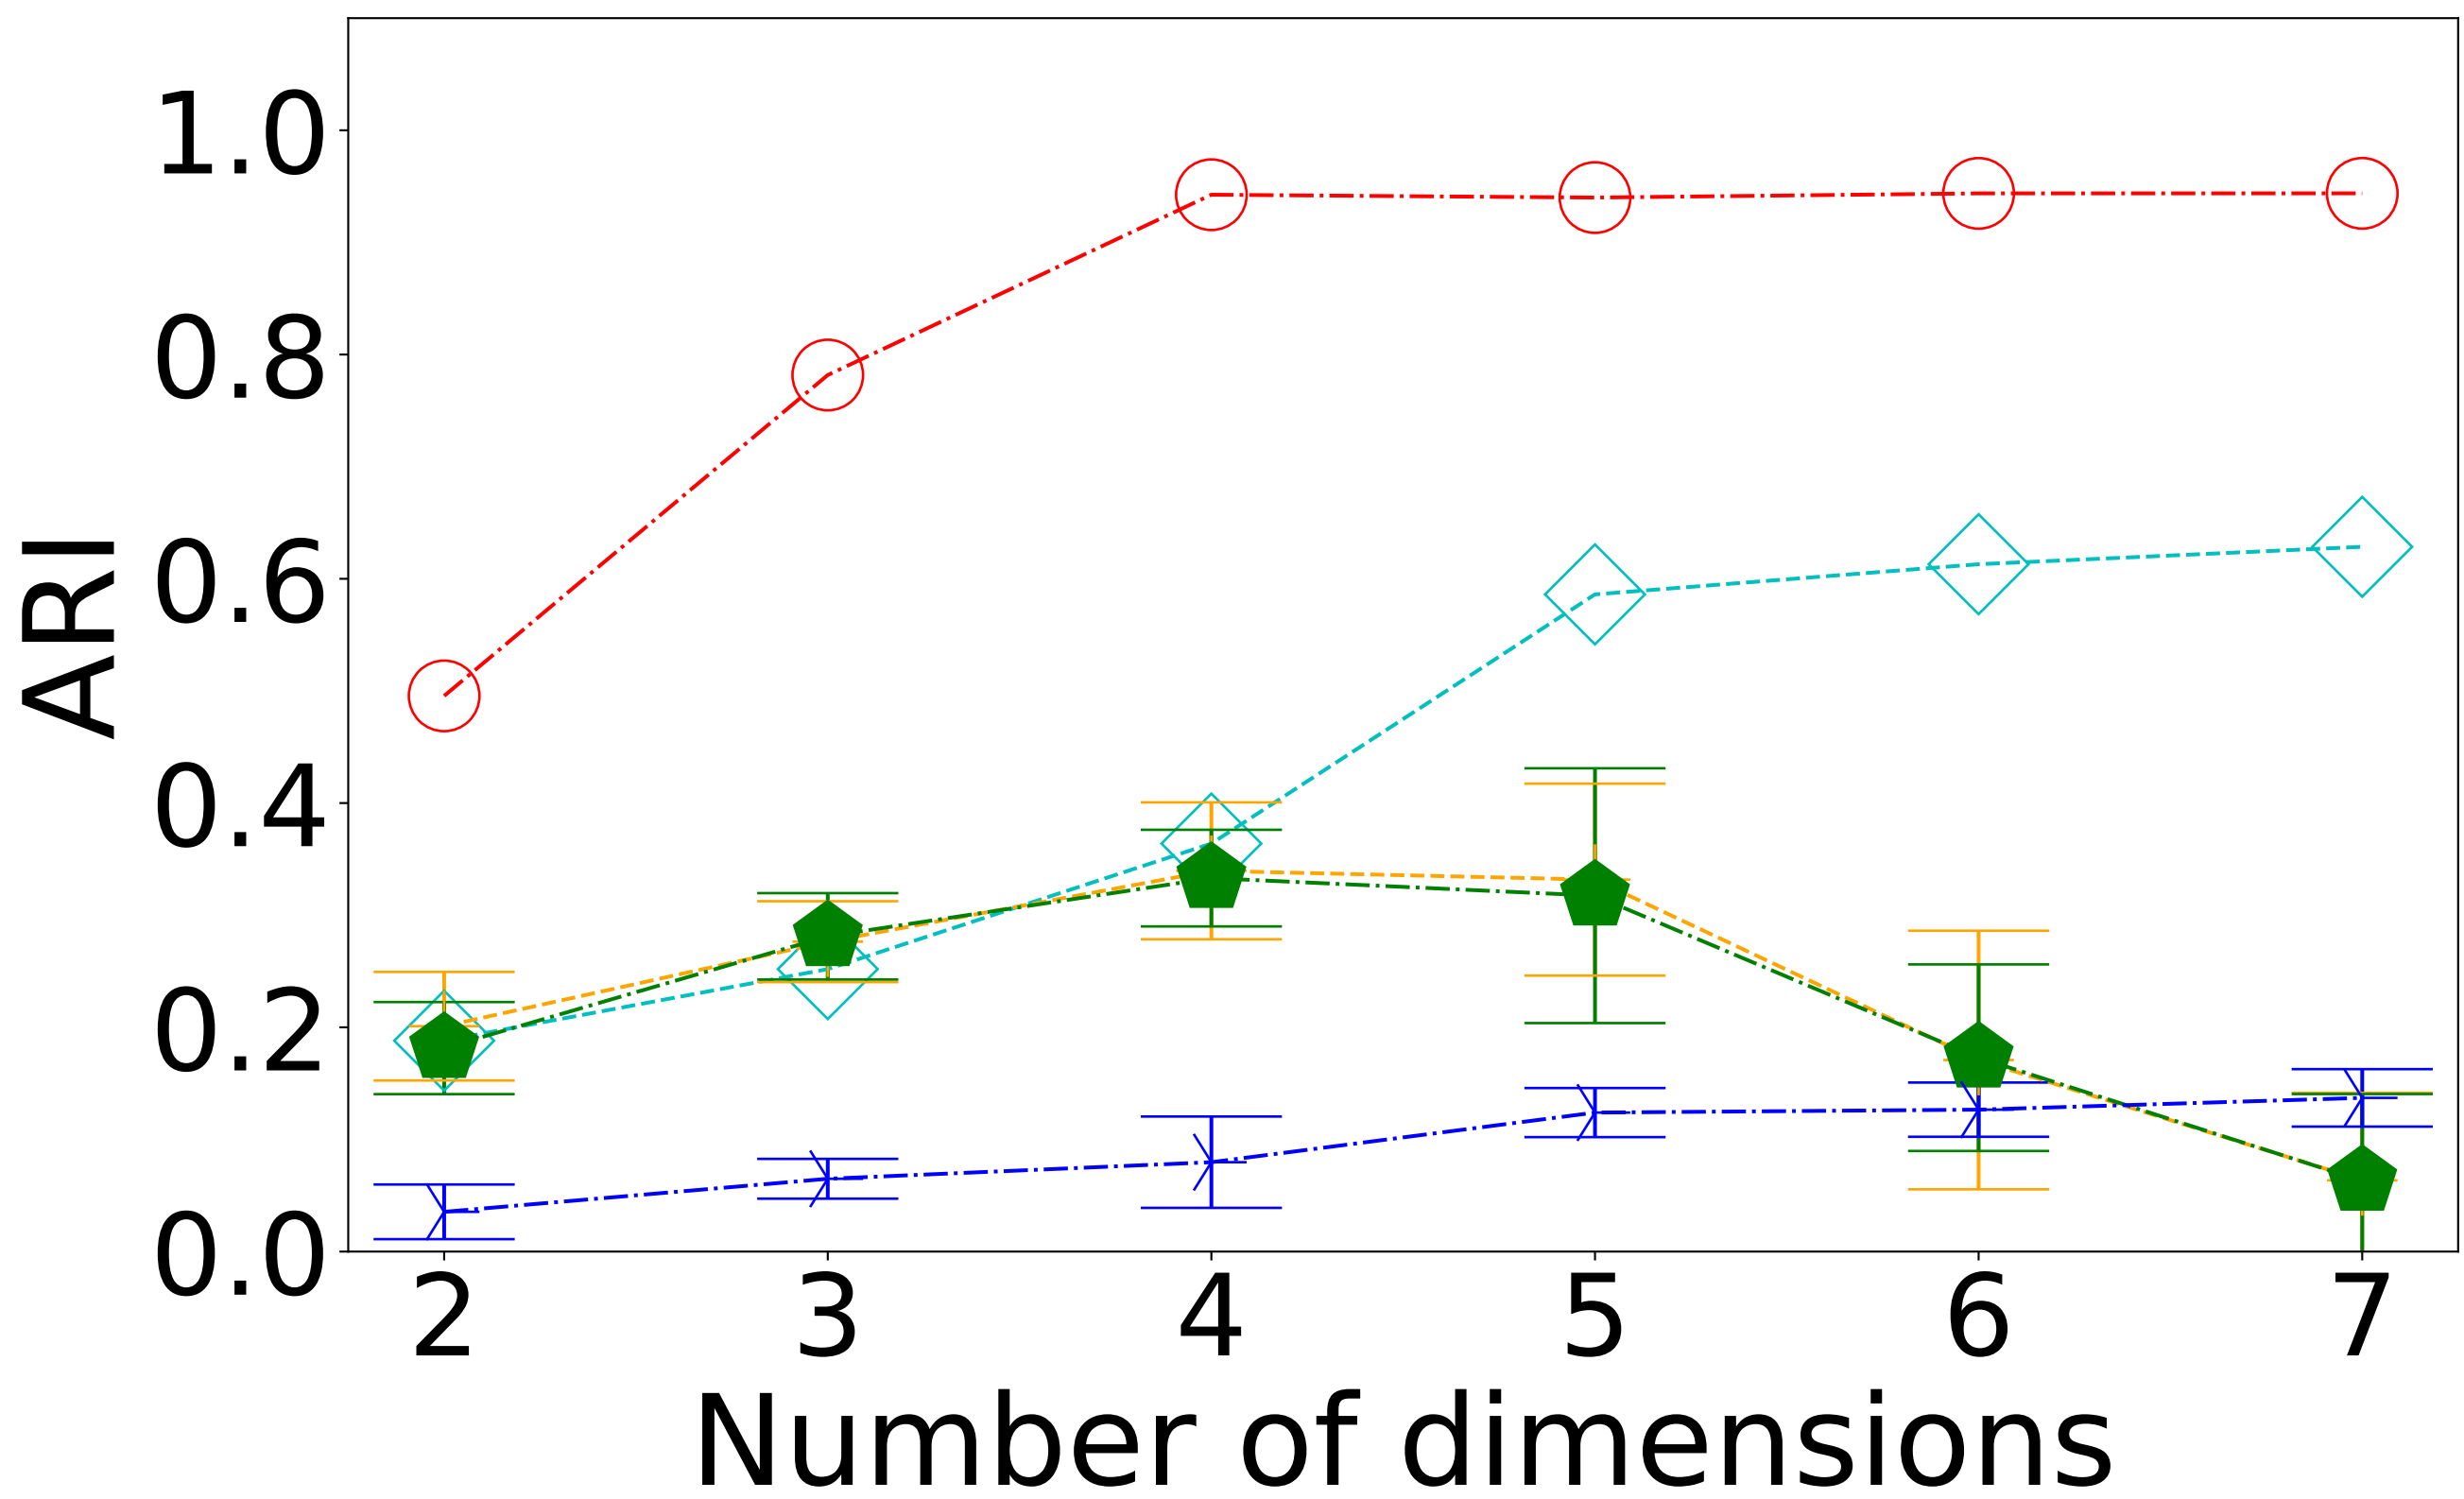

Supplement: supplementary_material [file attachment]

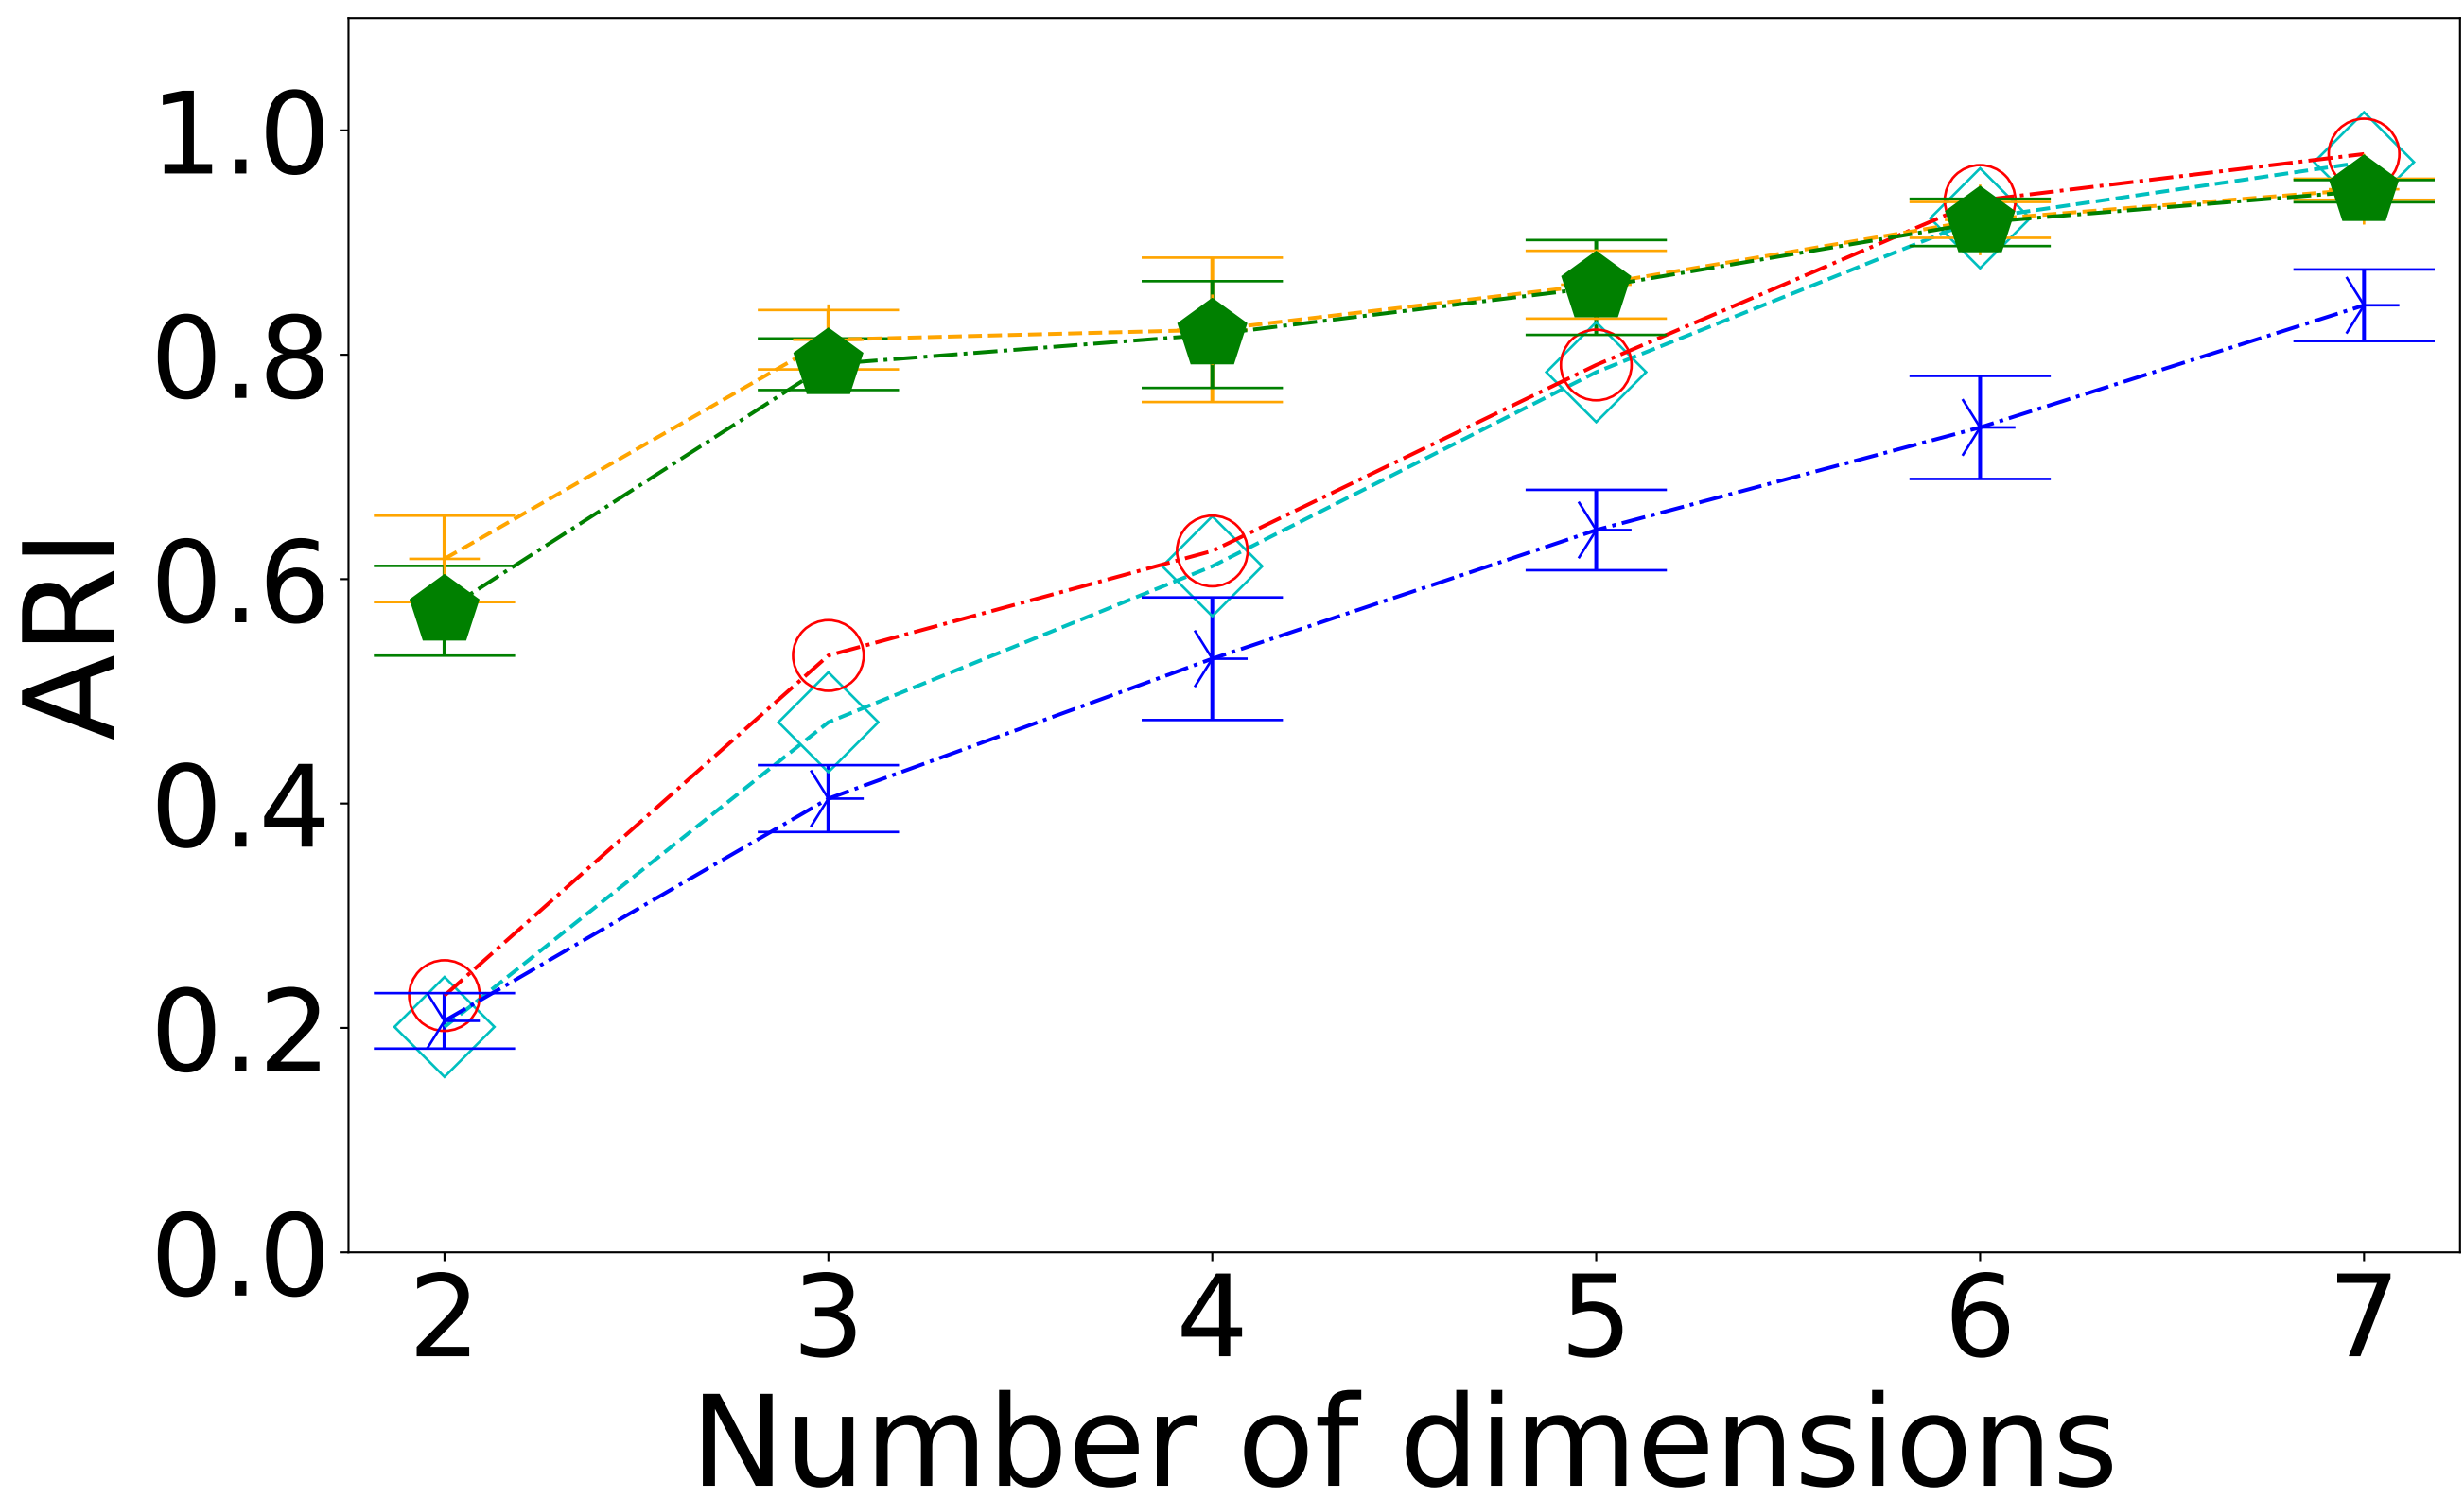

Supplement: supplementary_material [file attachment]

$D_E$ 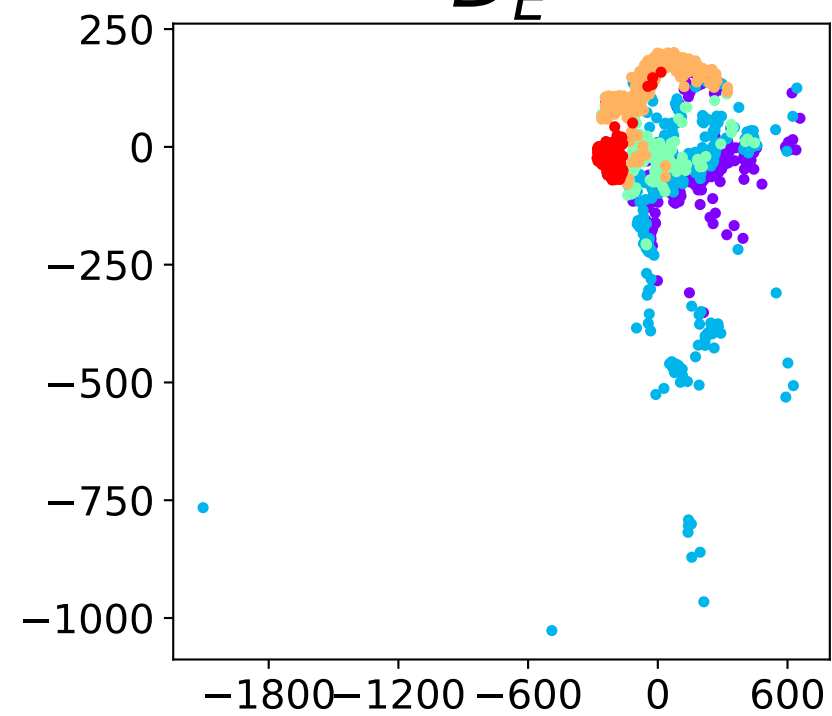 $D_r$ 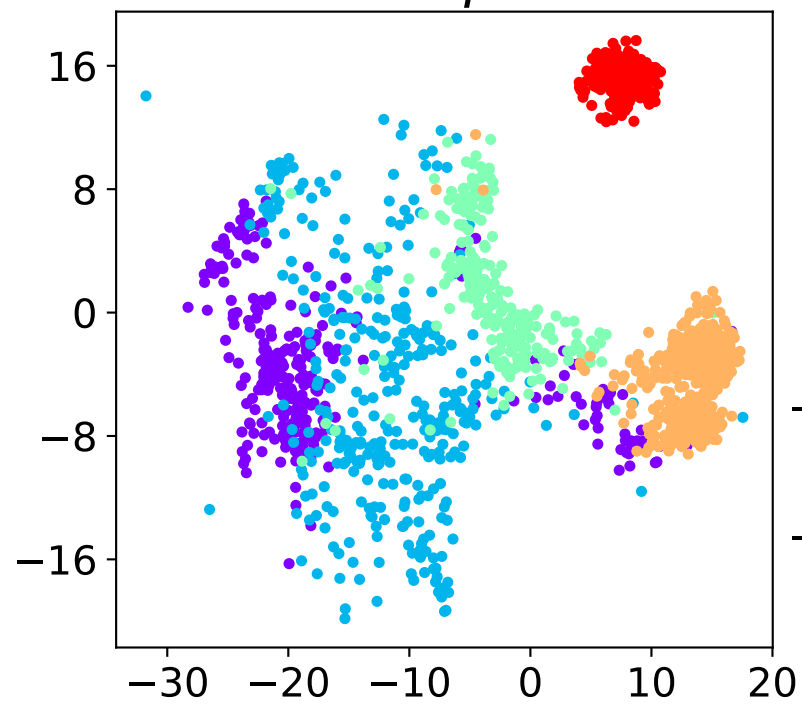 $D_{\text{asin}}$ 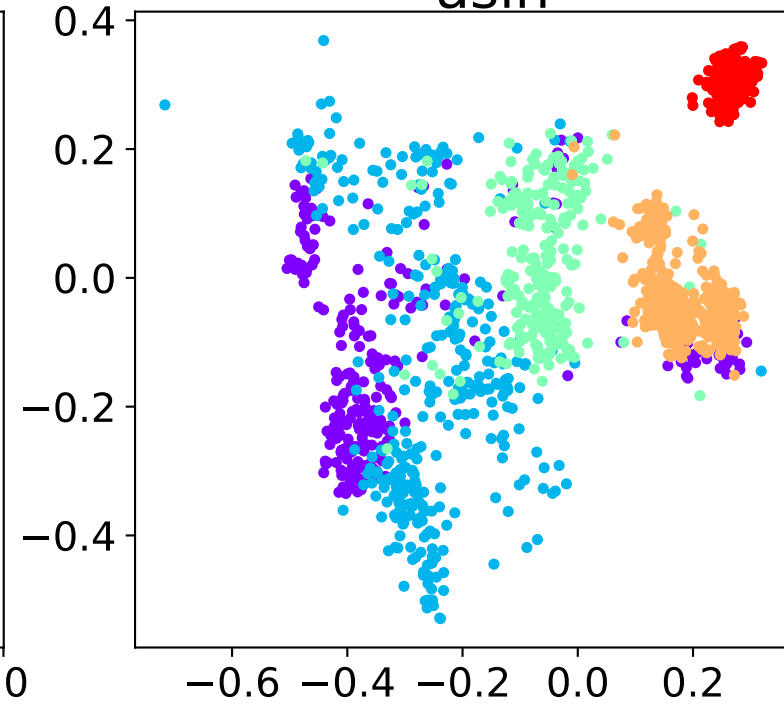 $D_{\log}$ 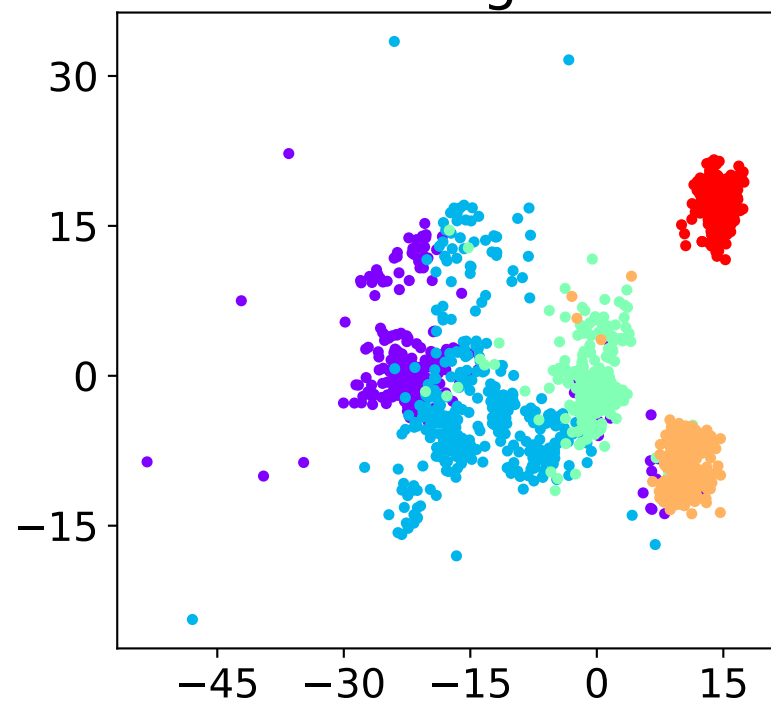 $D_P$ 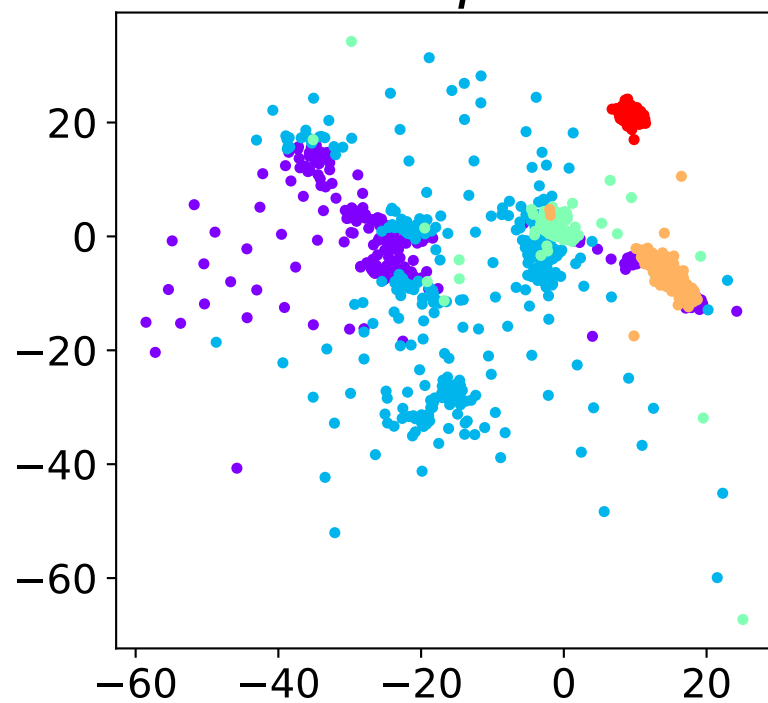 $D_{NB}$ 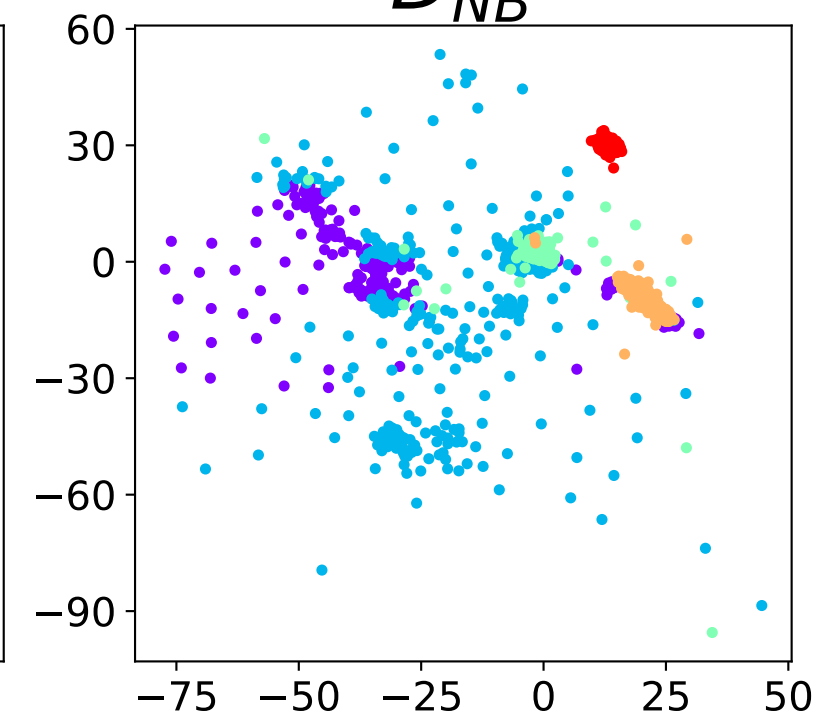

Supplement: supplementary_material [file attachment]

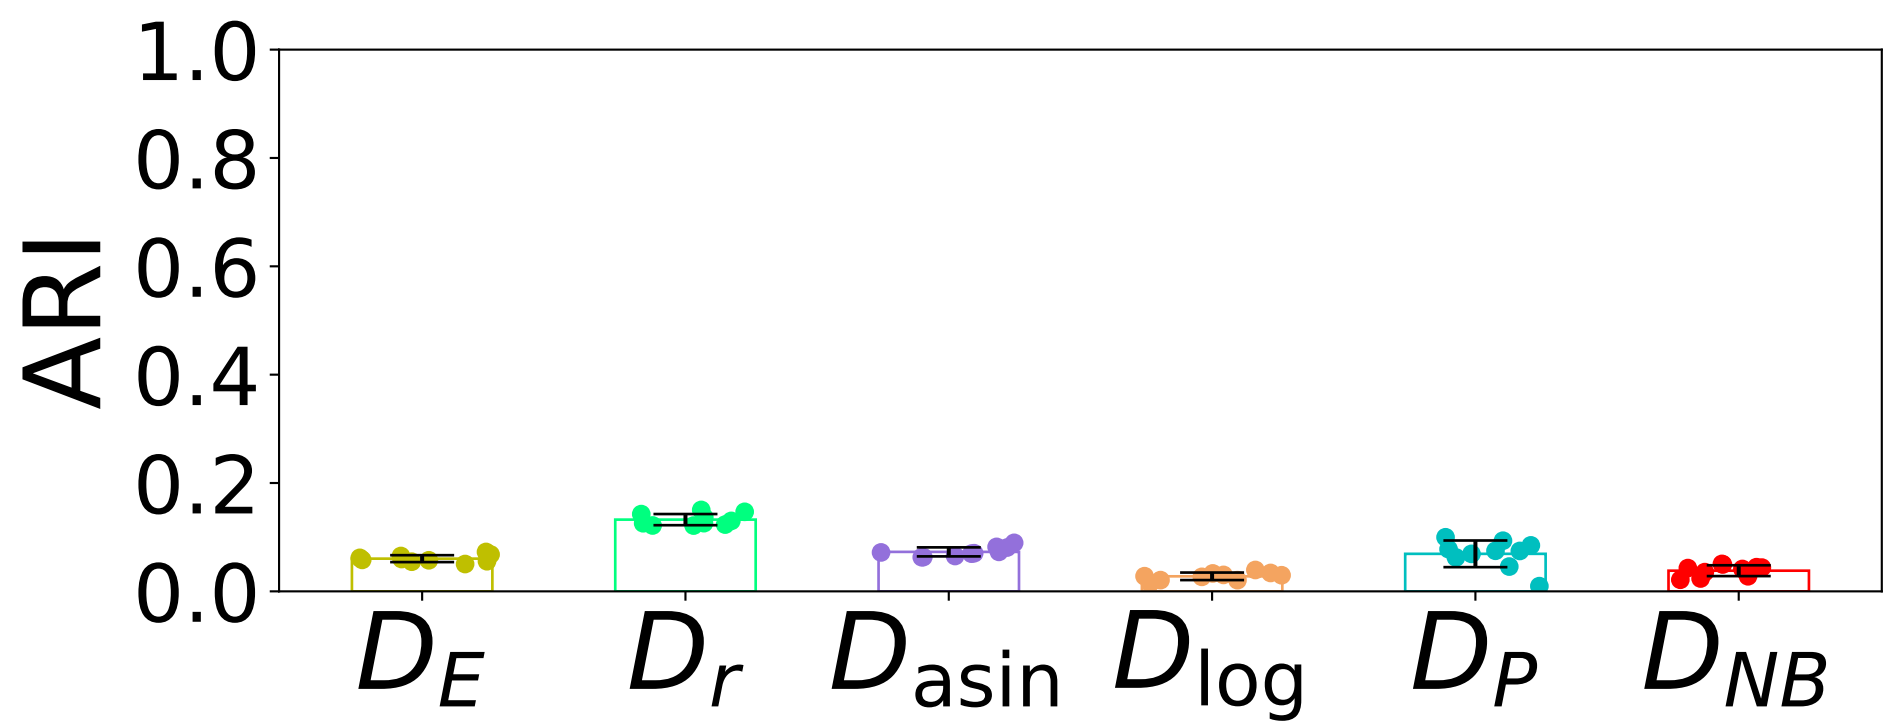

Supplement: supplementary_material [file attachment]

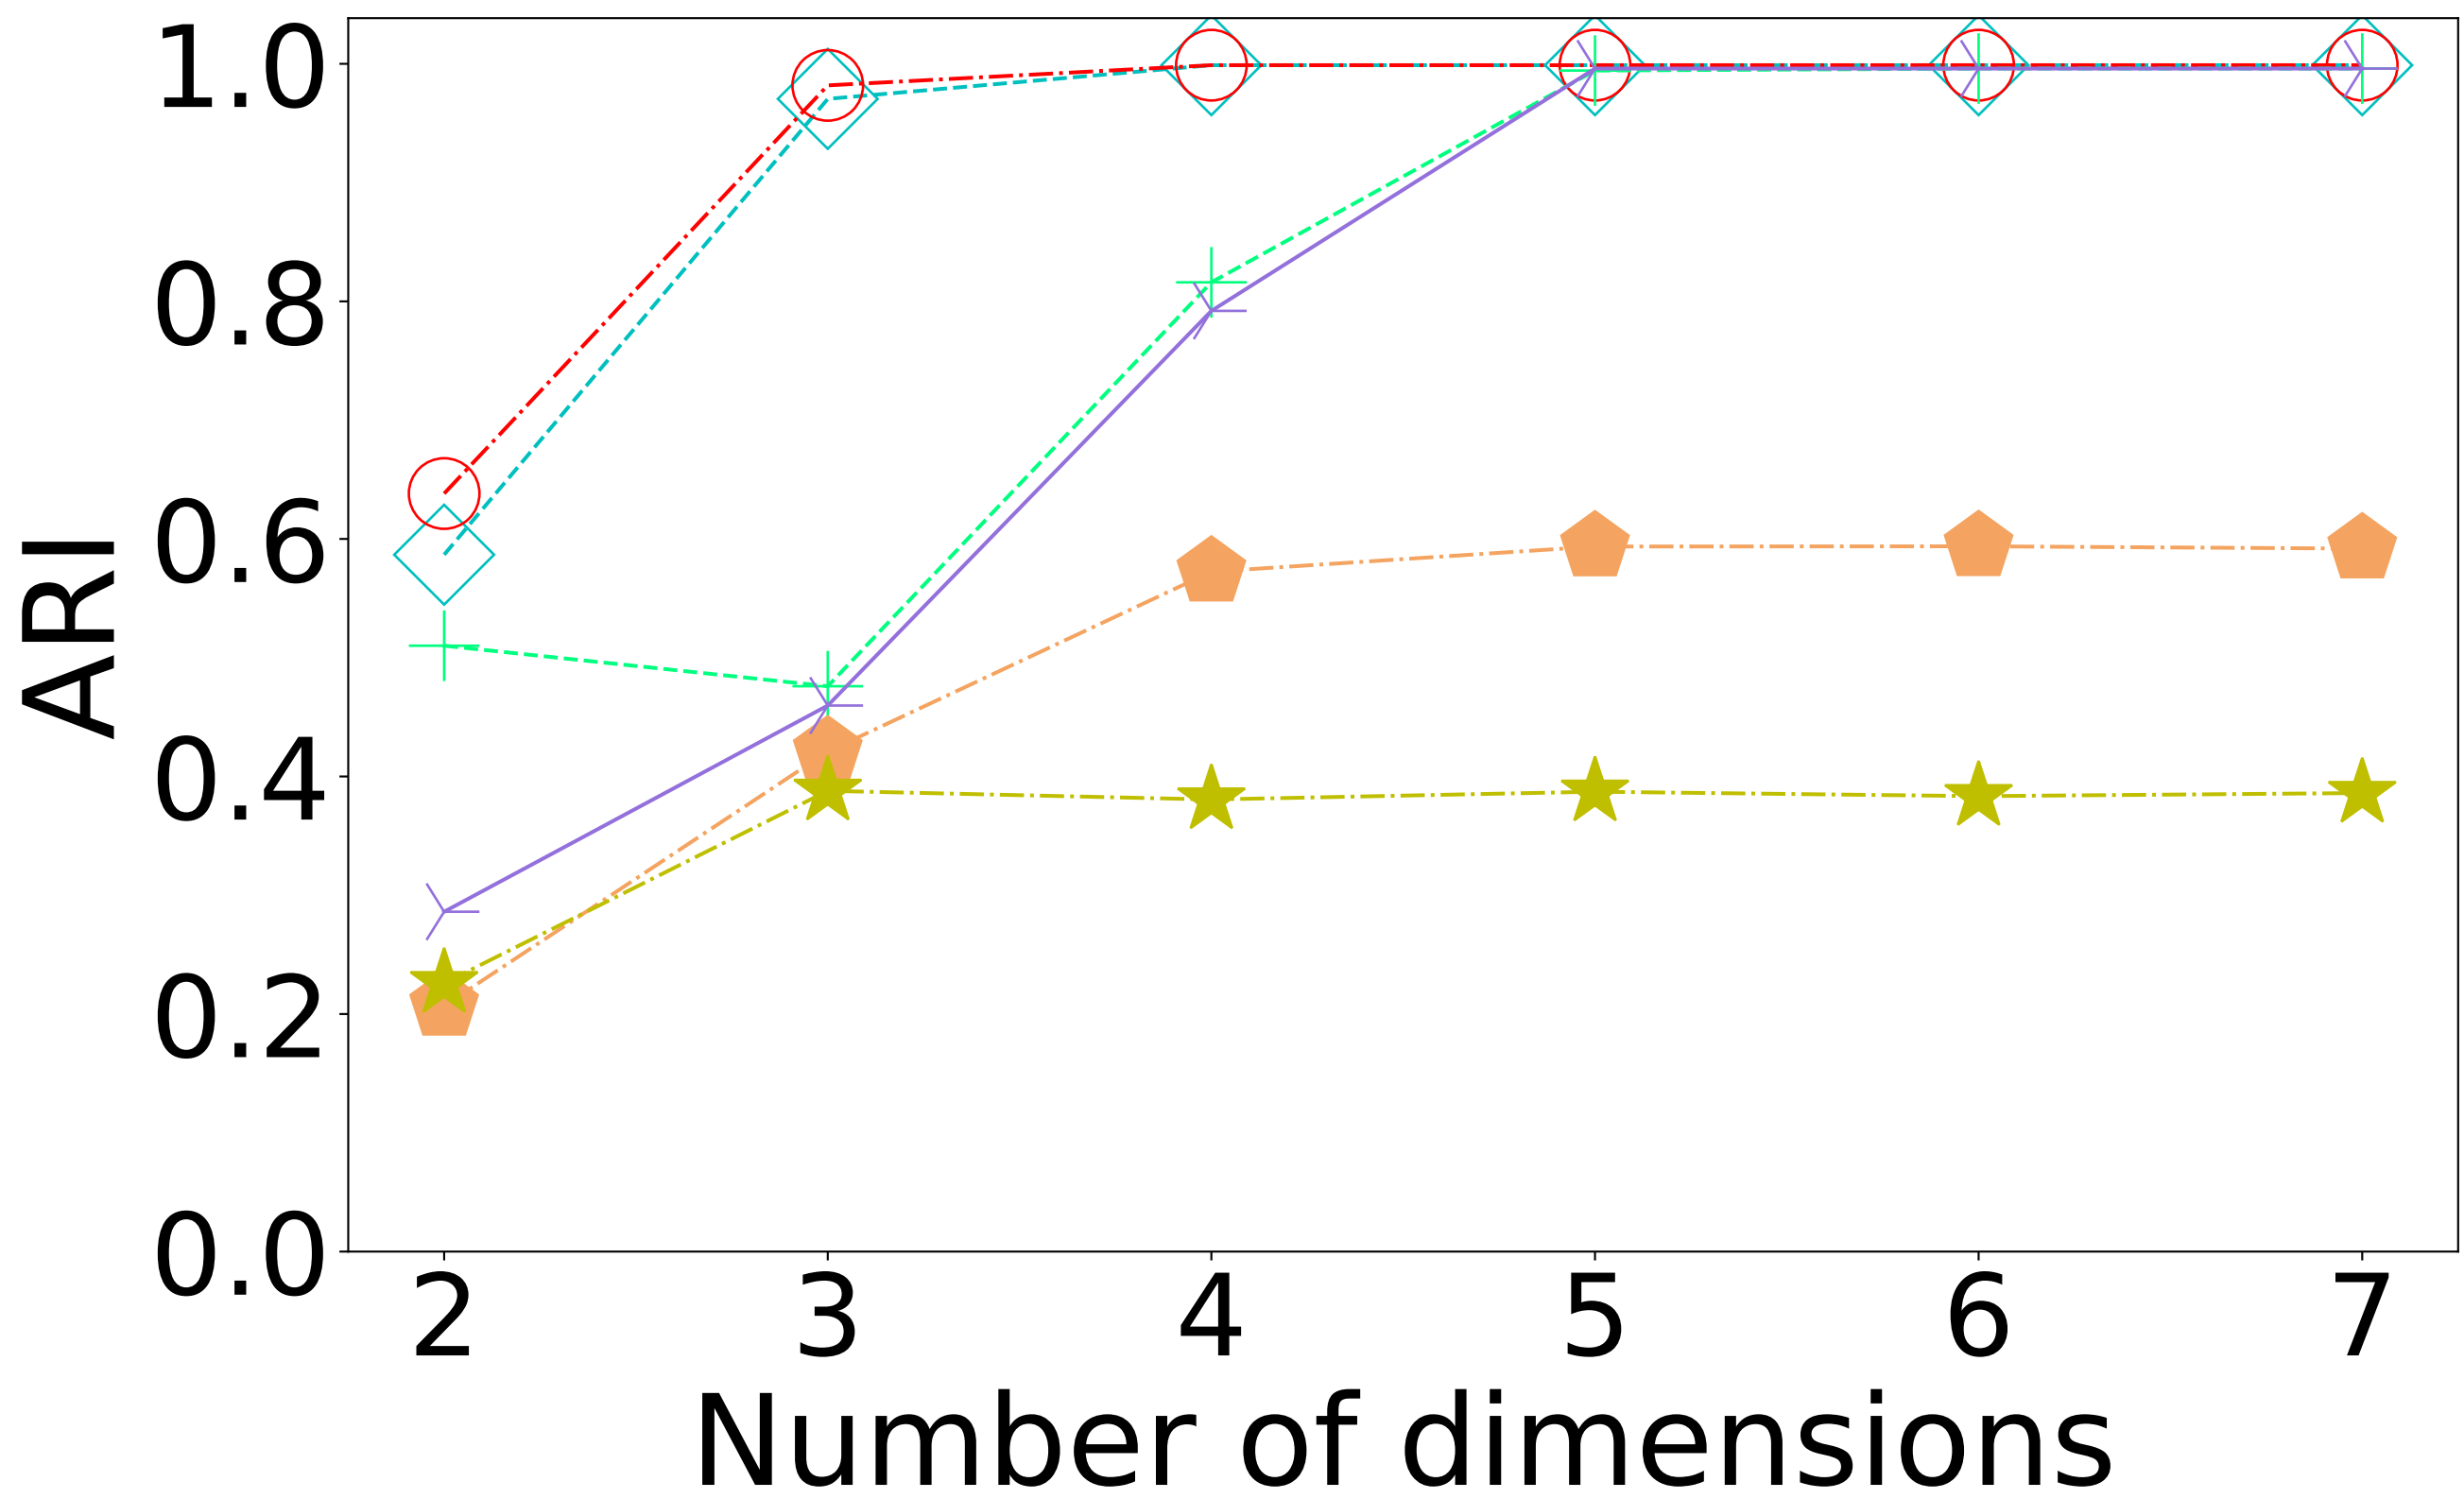

Supplement: supplementary_material [file attachment]

$D_E$ 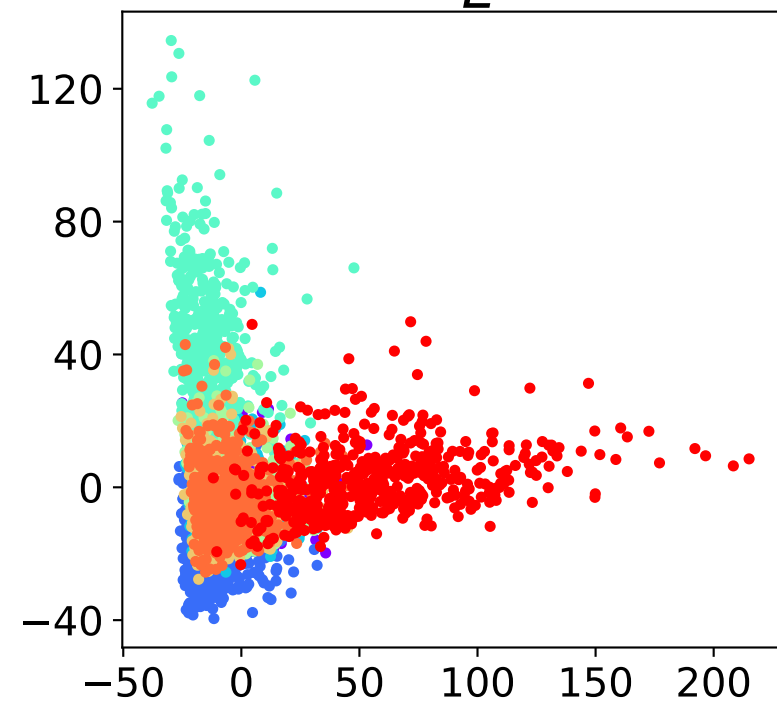 $D_r$ 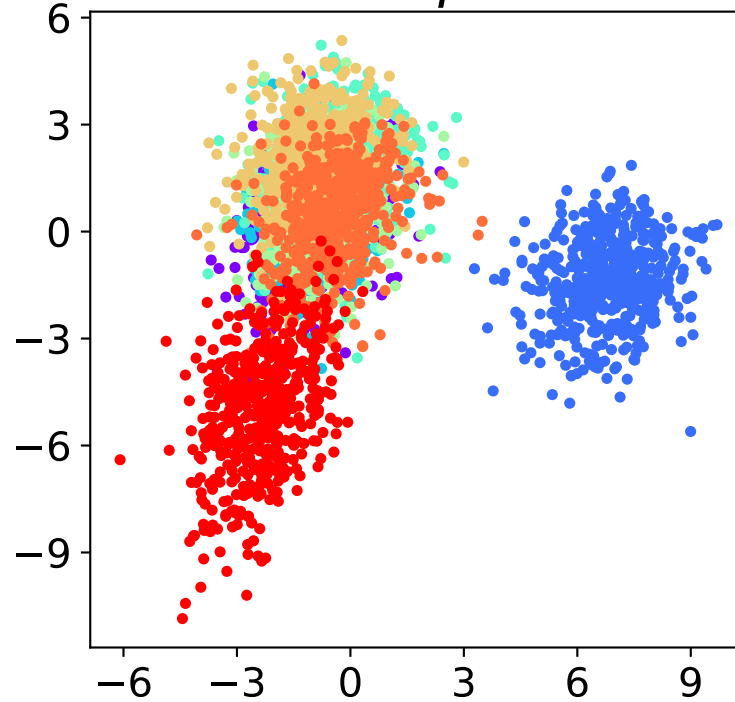 $D_{\text{asin}}$ 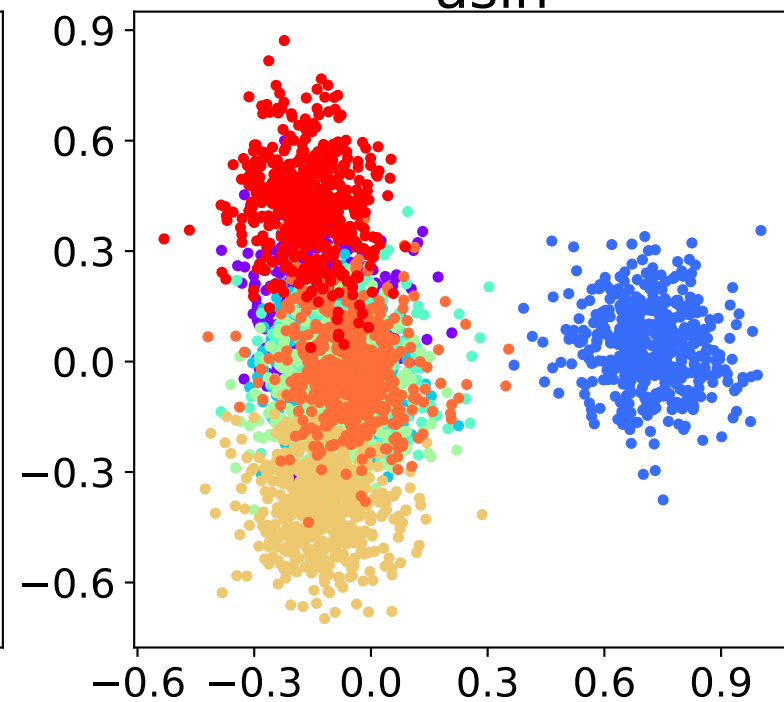 $D_{\log}$ 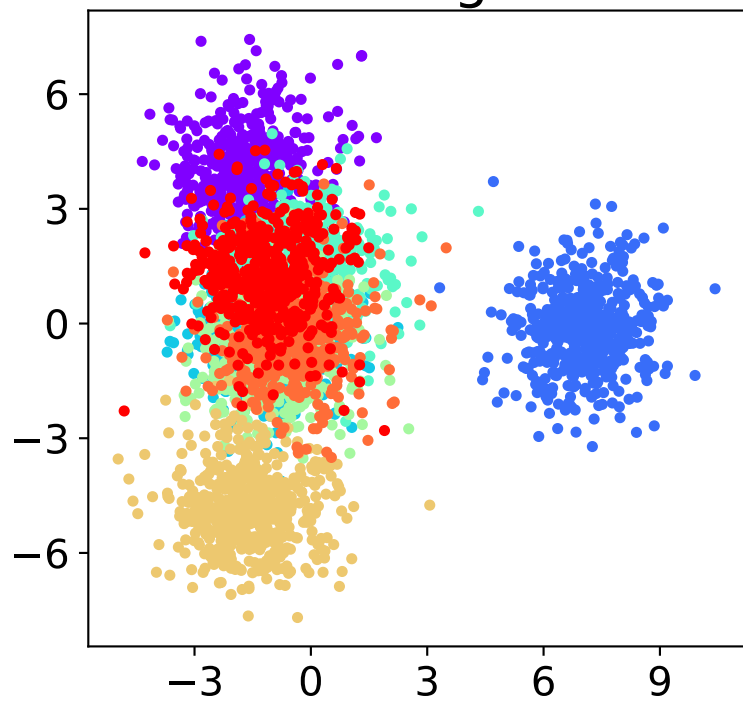 $D_P$ 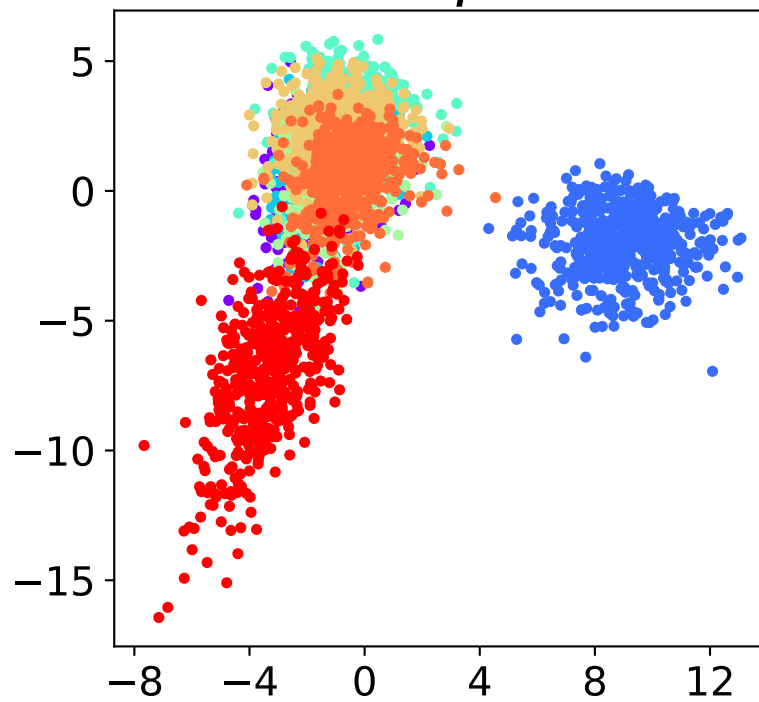 $D_{NB}$ 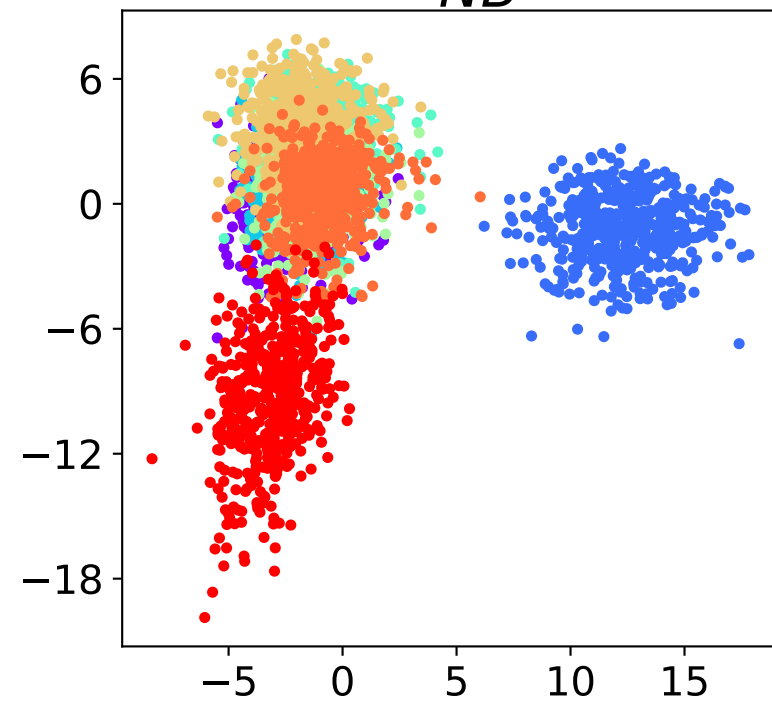

Supplement: supplementary_material [file attachment]

$D_E$ 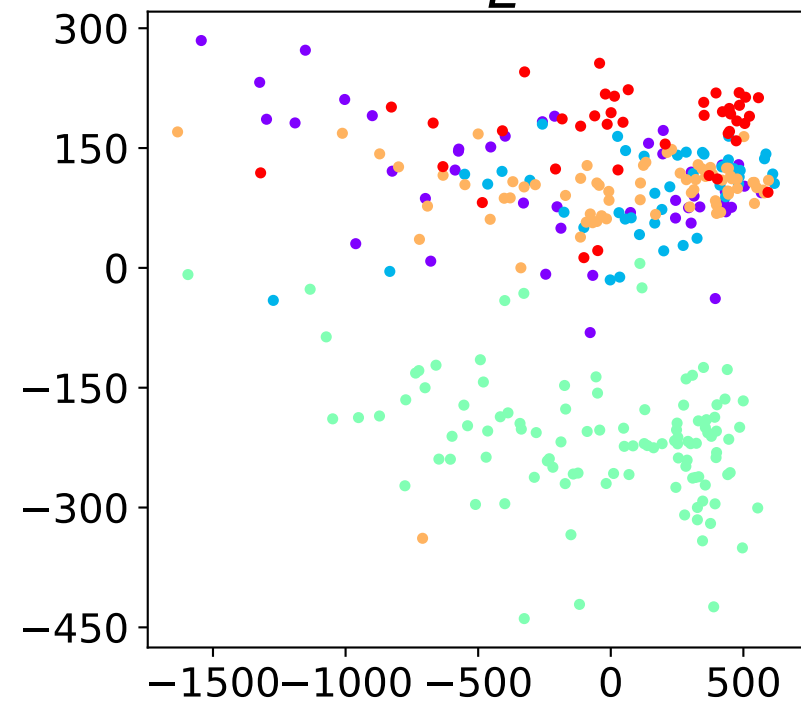 $D_r$ 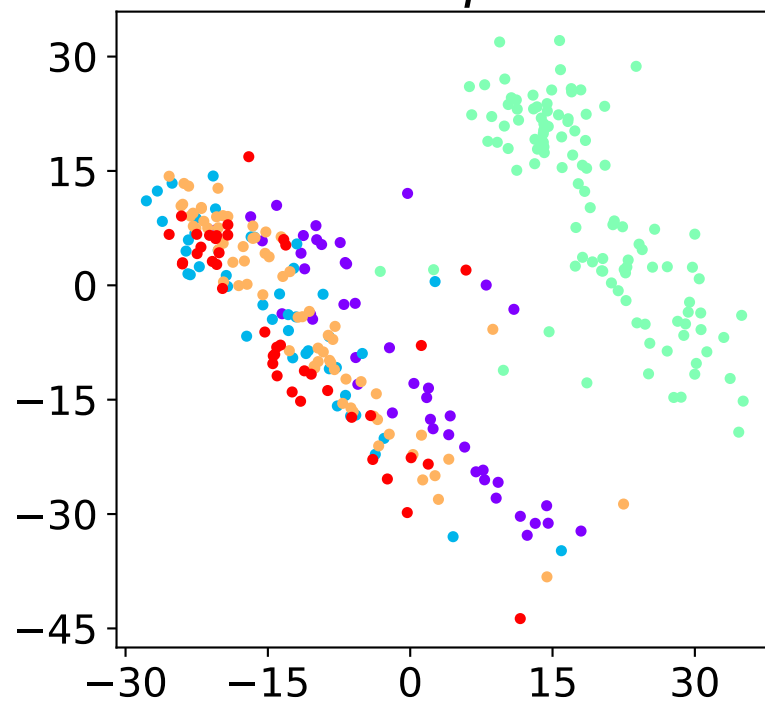 $D_{\text{asin}}$ 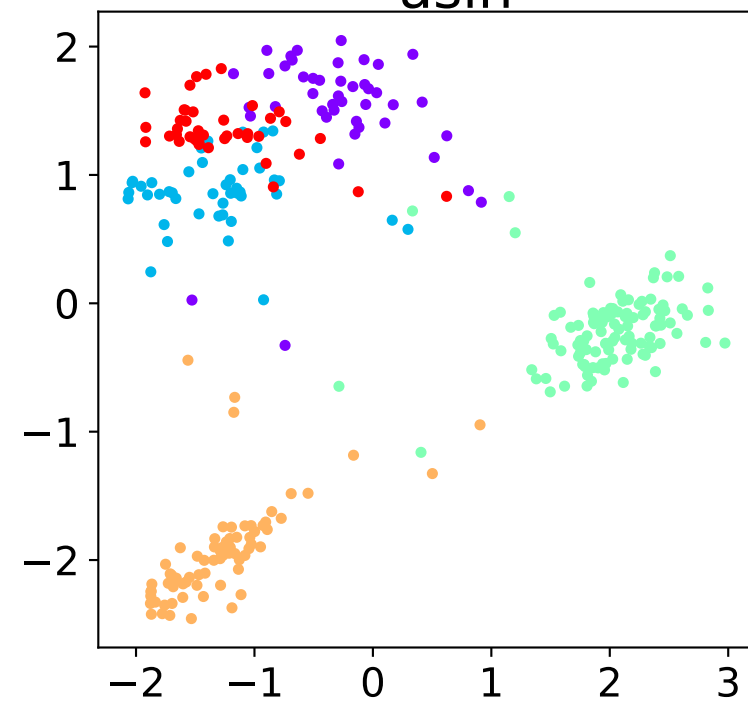 $D_{\log}$ 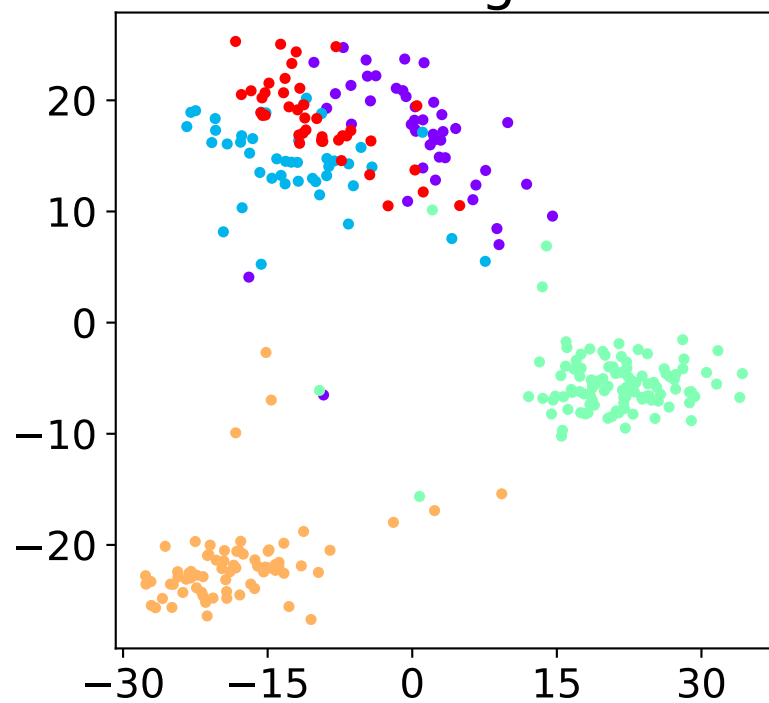 $D_P$ 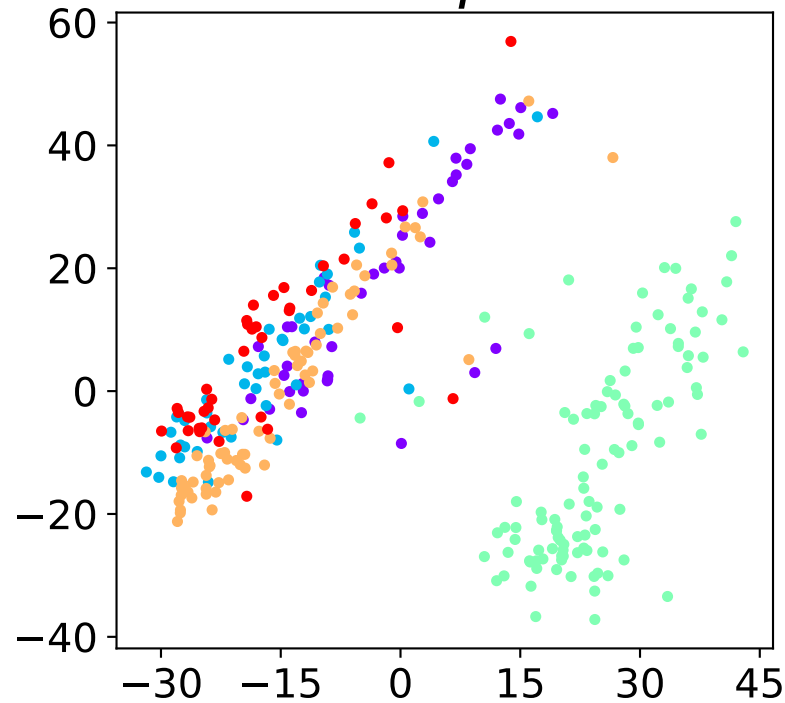 $D_{NB}$ 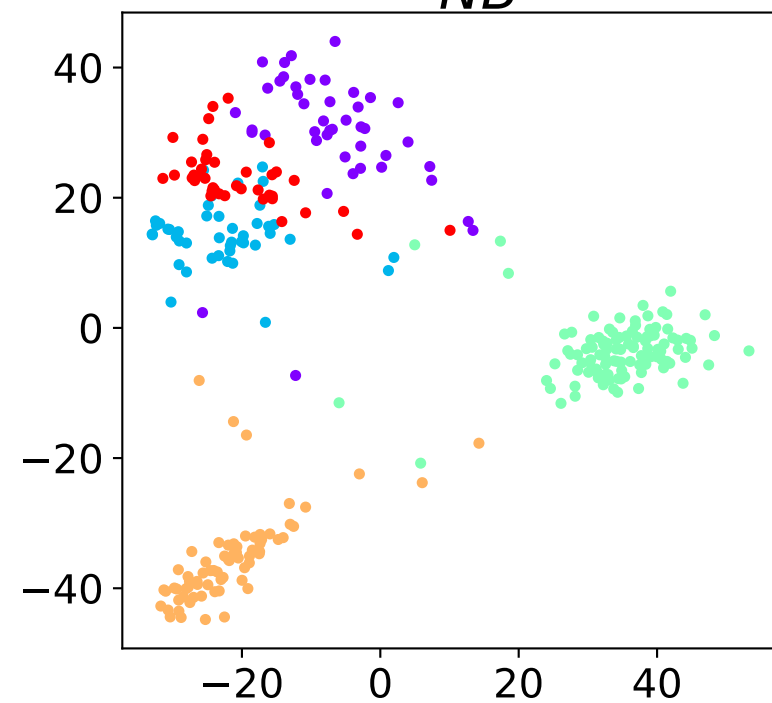

Supplement: supplementary_material [file attachment]

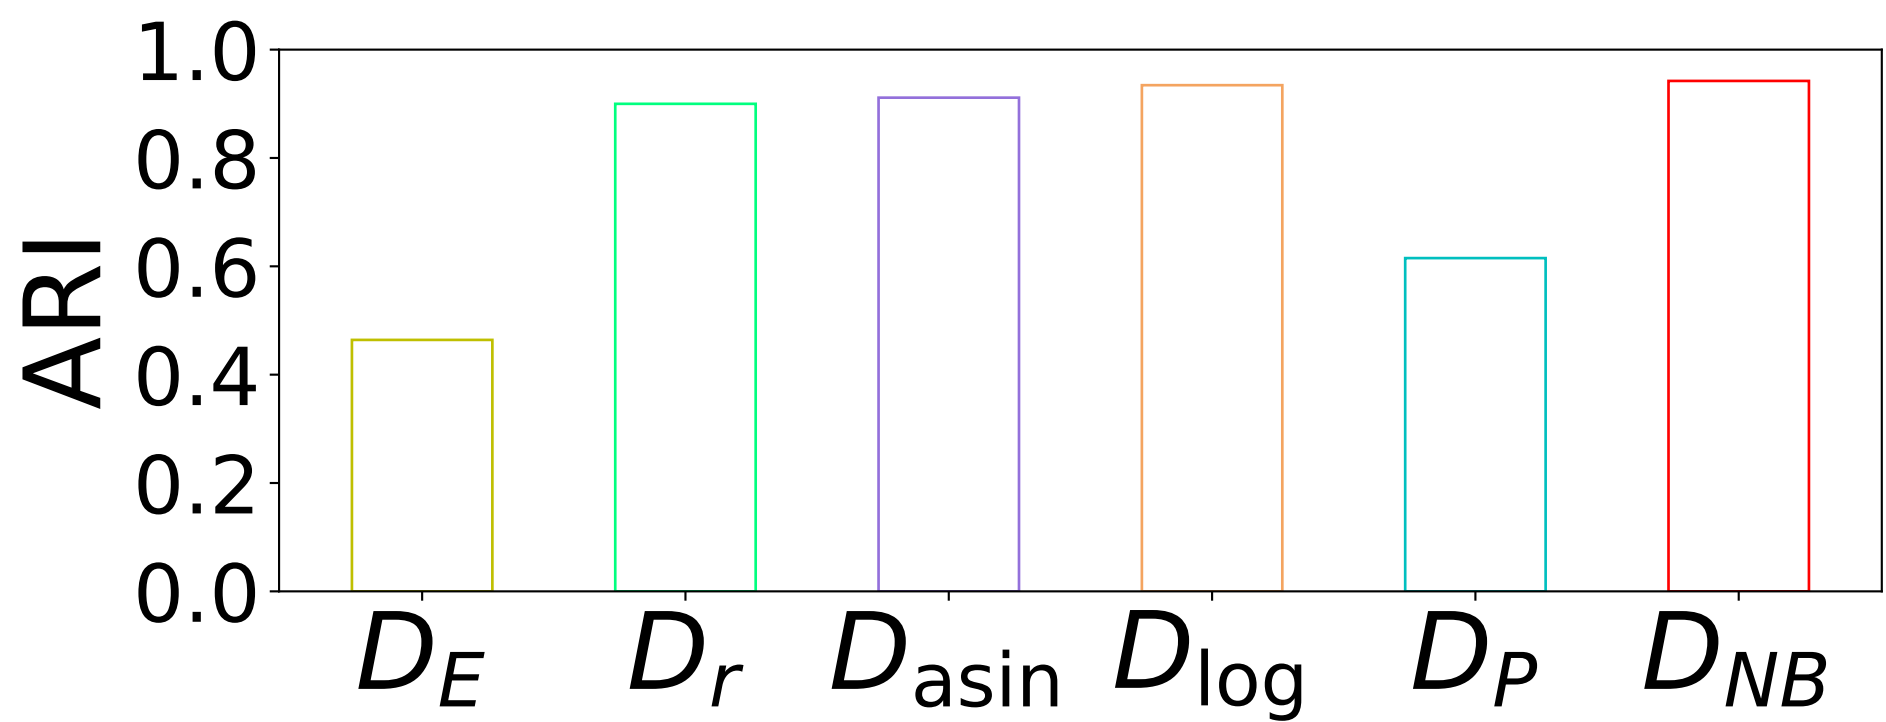

Supplement: supplementary_material [file attachment]

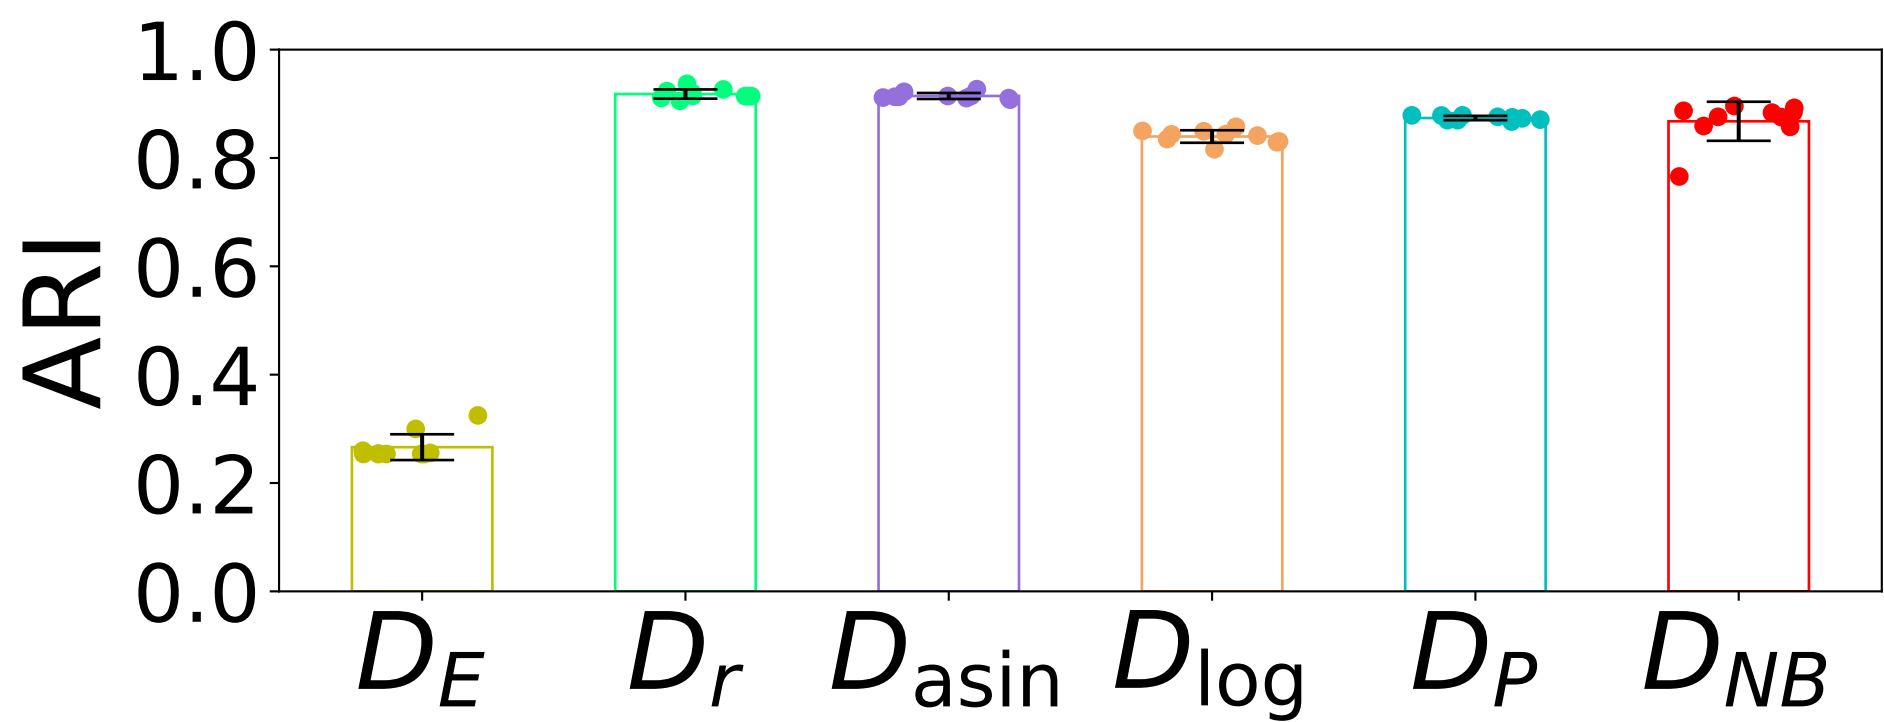

Supplement: supplementary_material [file attachment]

$D_E$ 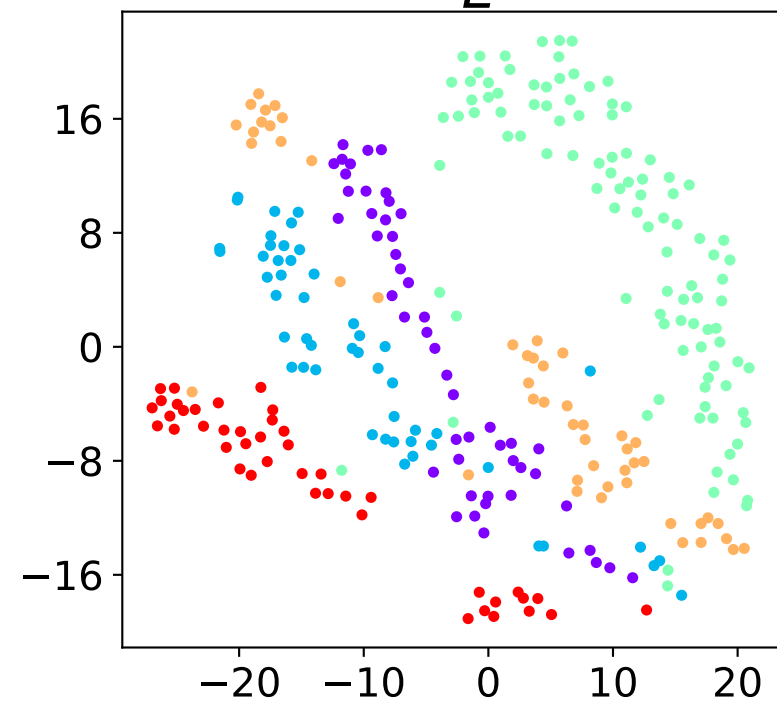 $D_r$ 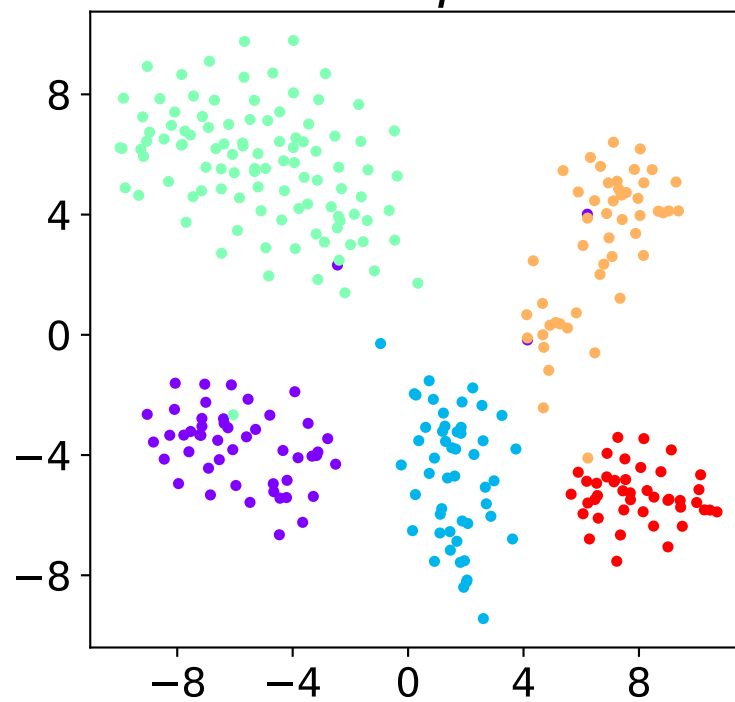 $D_{\text{asin}}$ 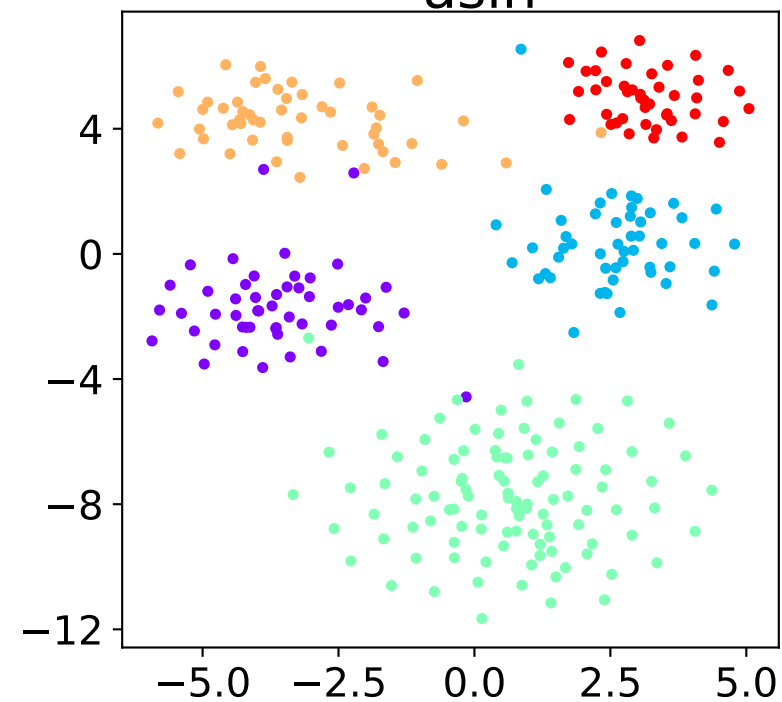 $D_{\text{log}}$ 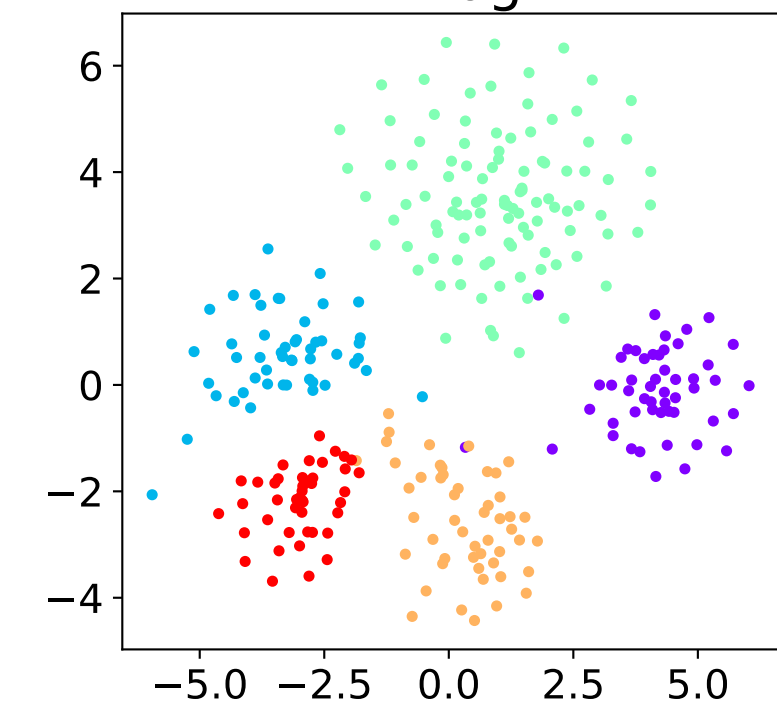 $D_P$ 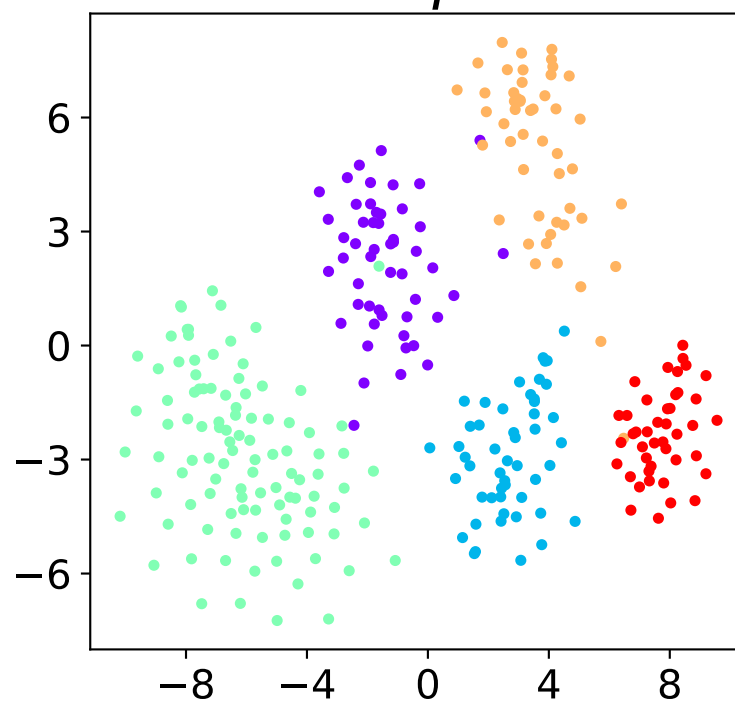 $D_{NB}$ 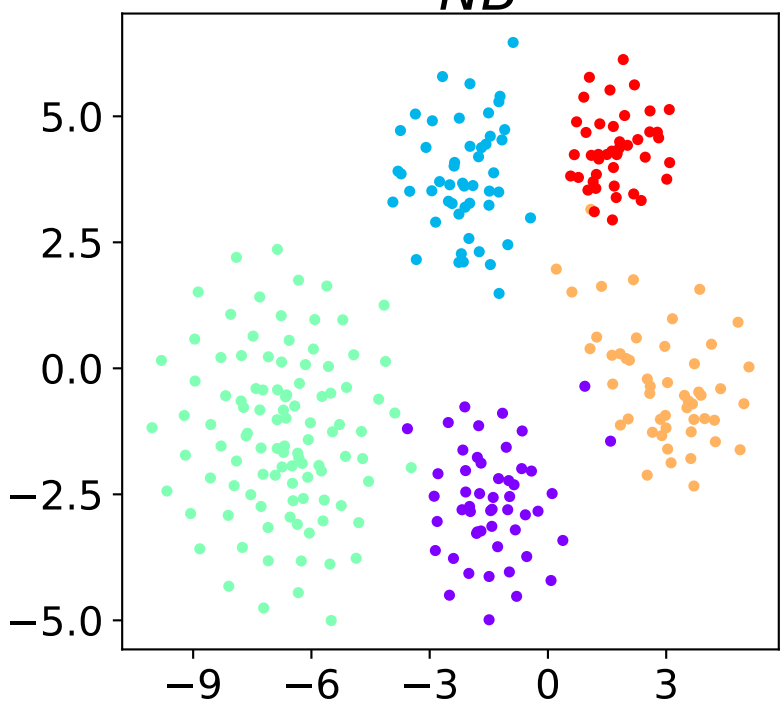

Supplement: supplementary_material [file attachment]

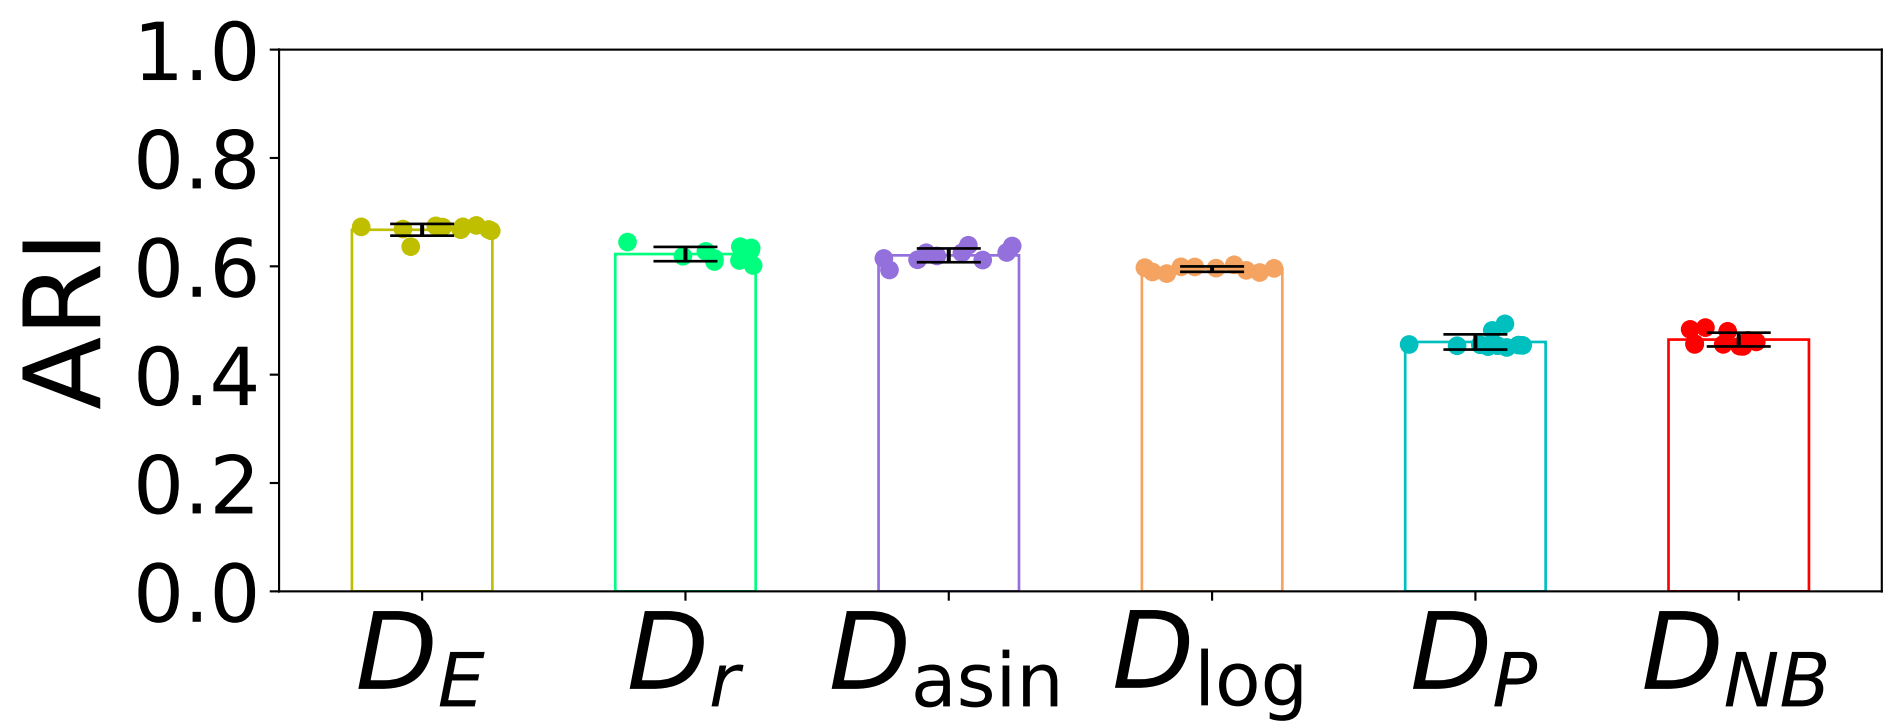

Supplement: supplementary_material [file attachment]

$D_E$ 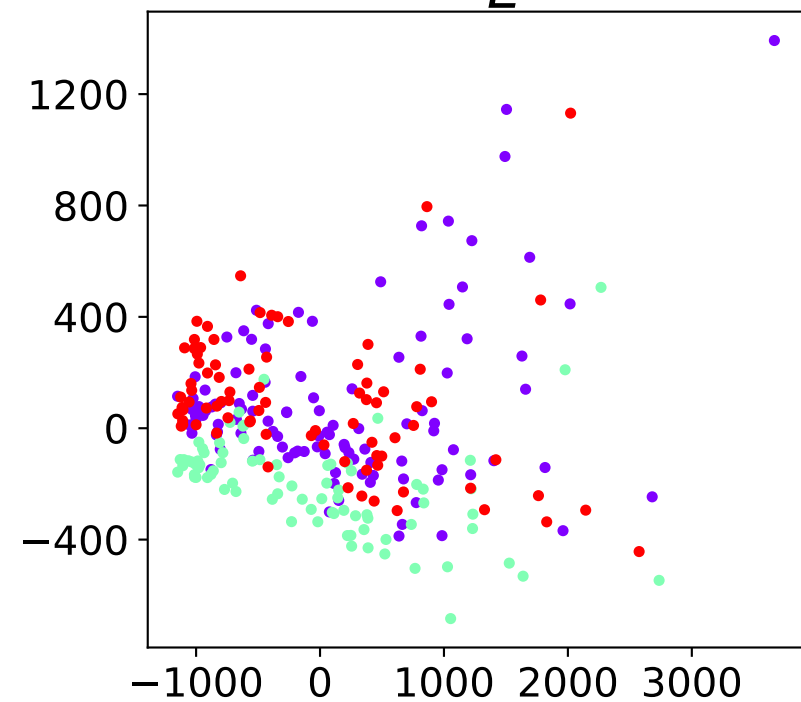 $D_r$ 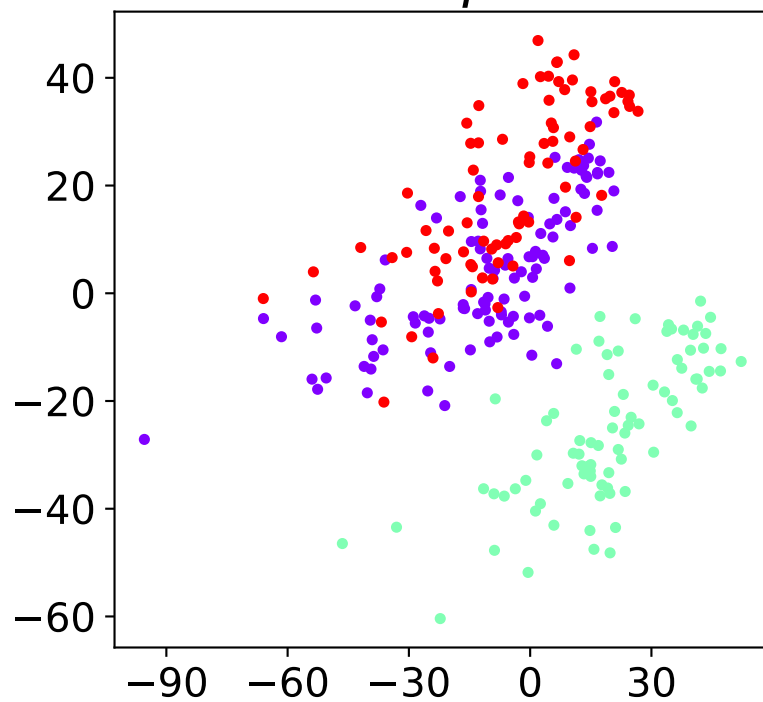 $D_{asin}$ 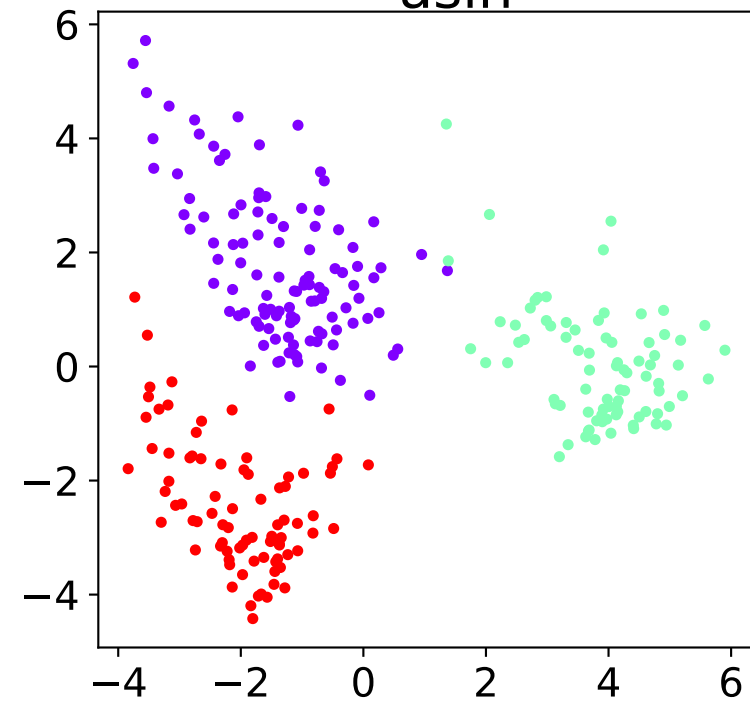 $D_{log}$ 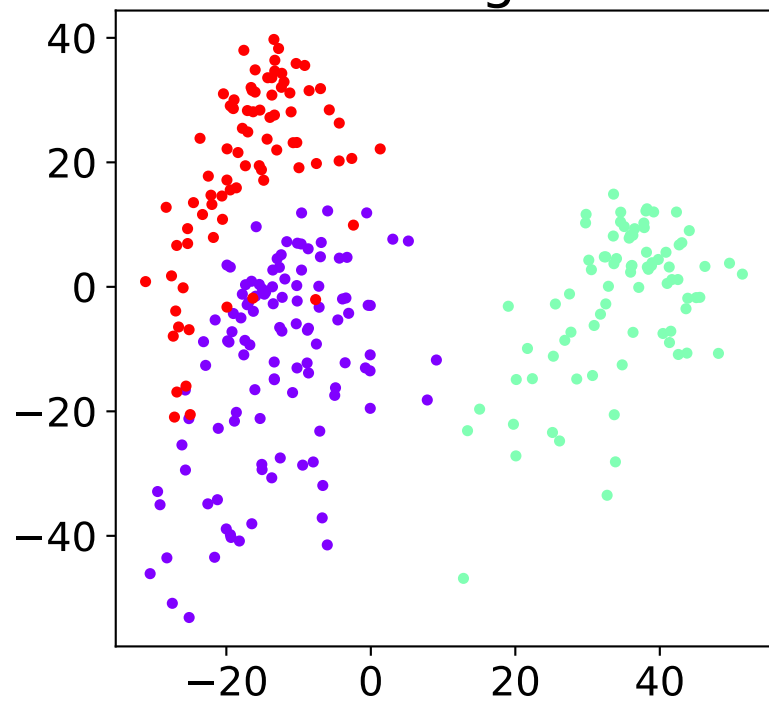 $D_P$ 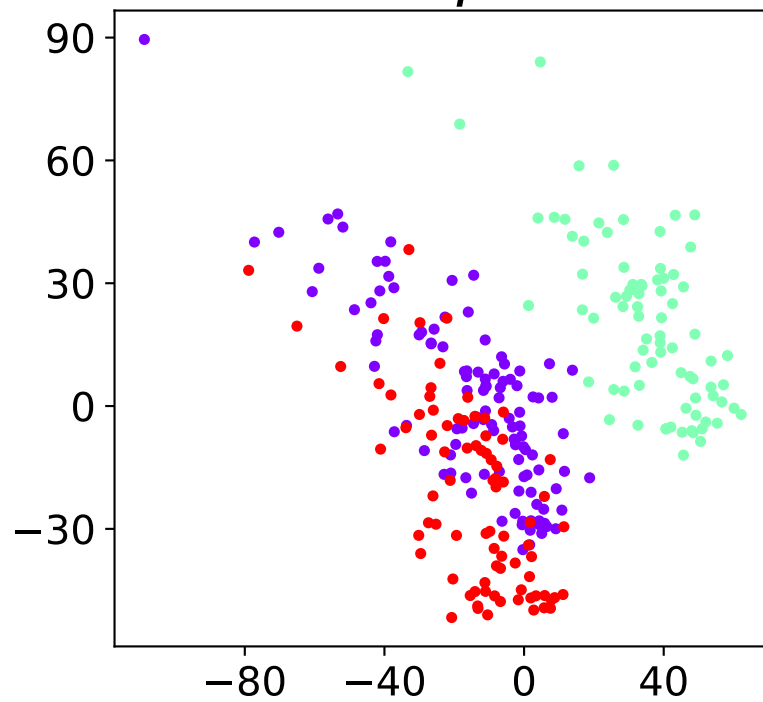 $D_{NB}$ 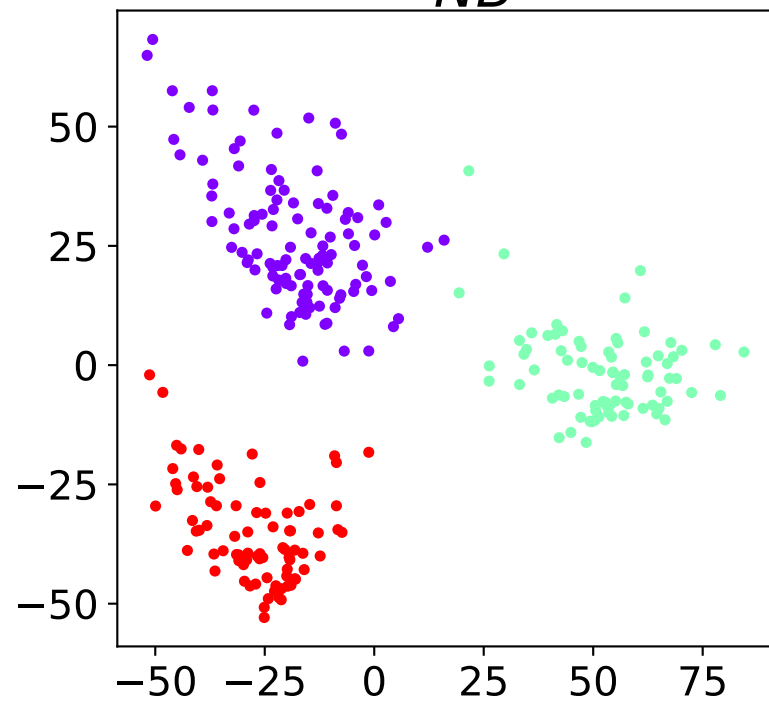

Supplement: supplementary_material [file attachment]

GPCA-P

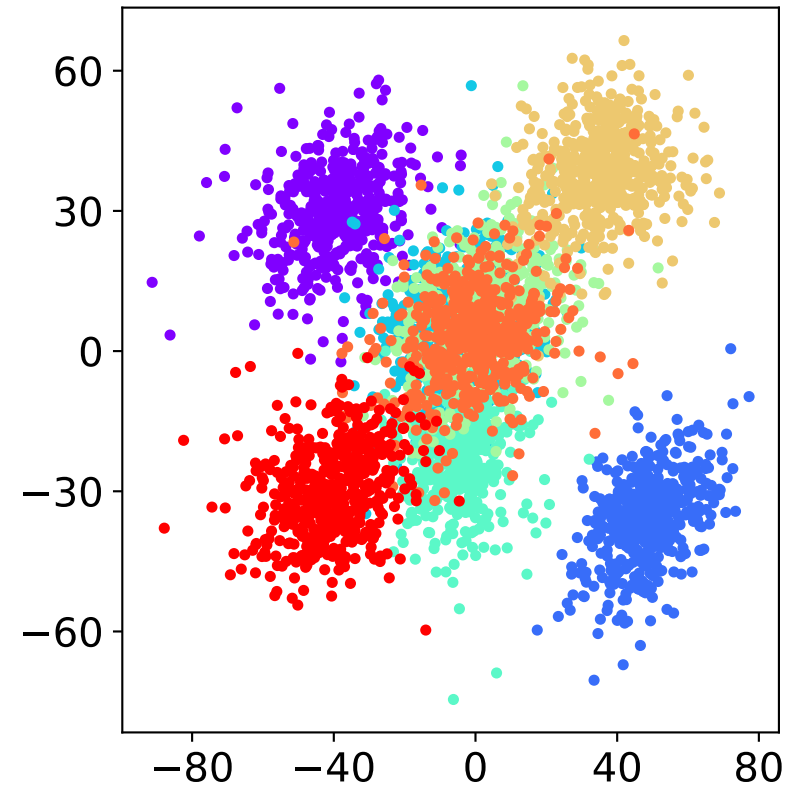

GPCA-NB

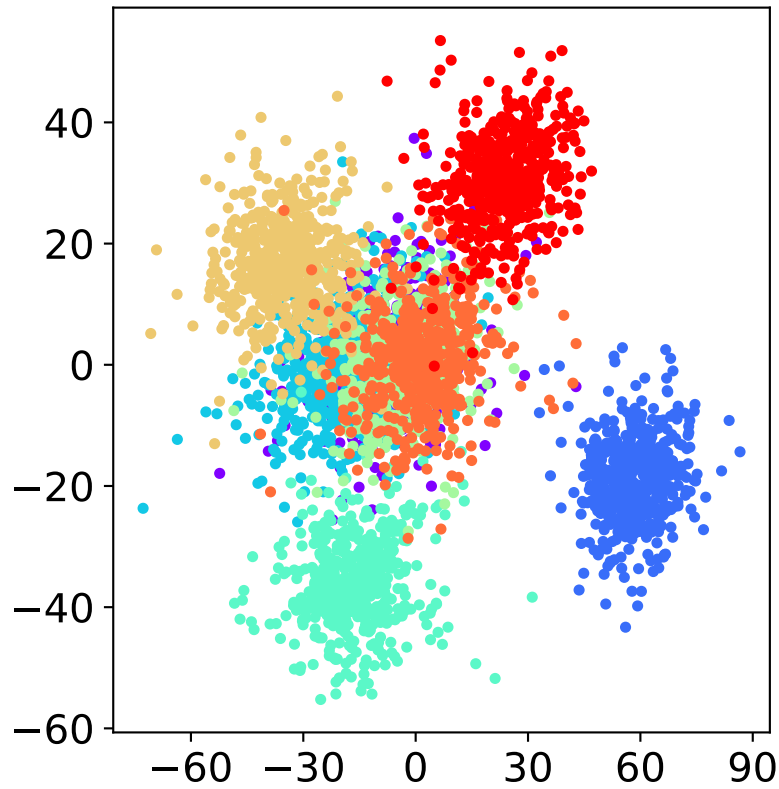

NMF

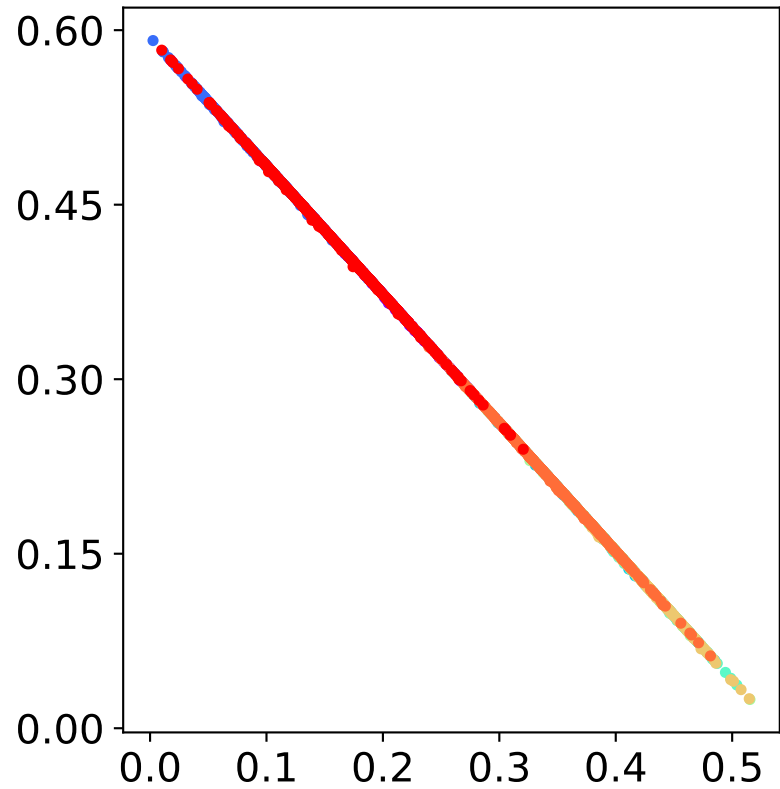

Supplement: supplementary_material [file attachment]

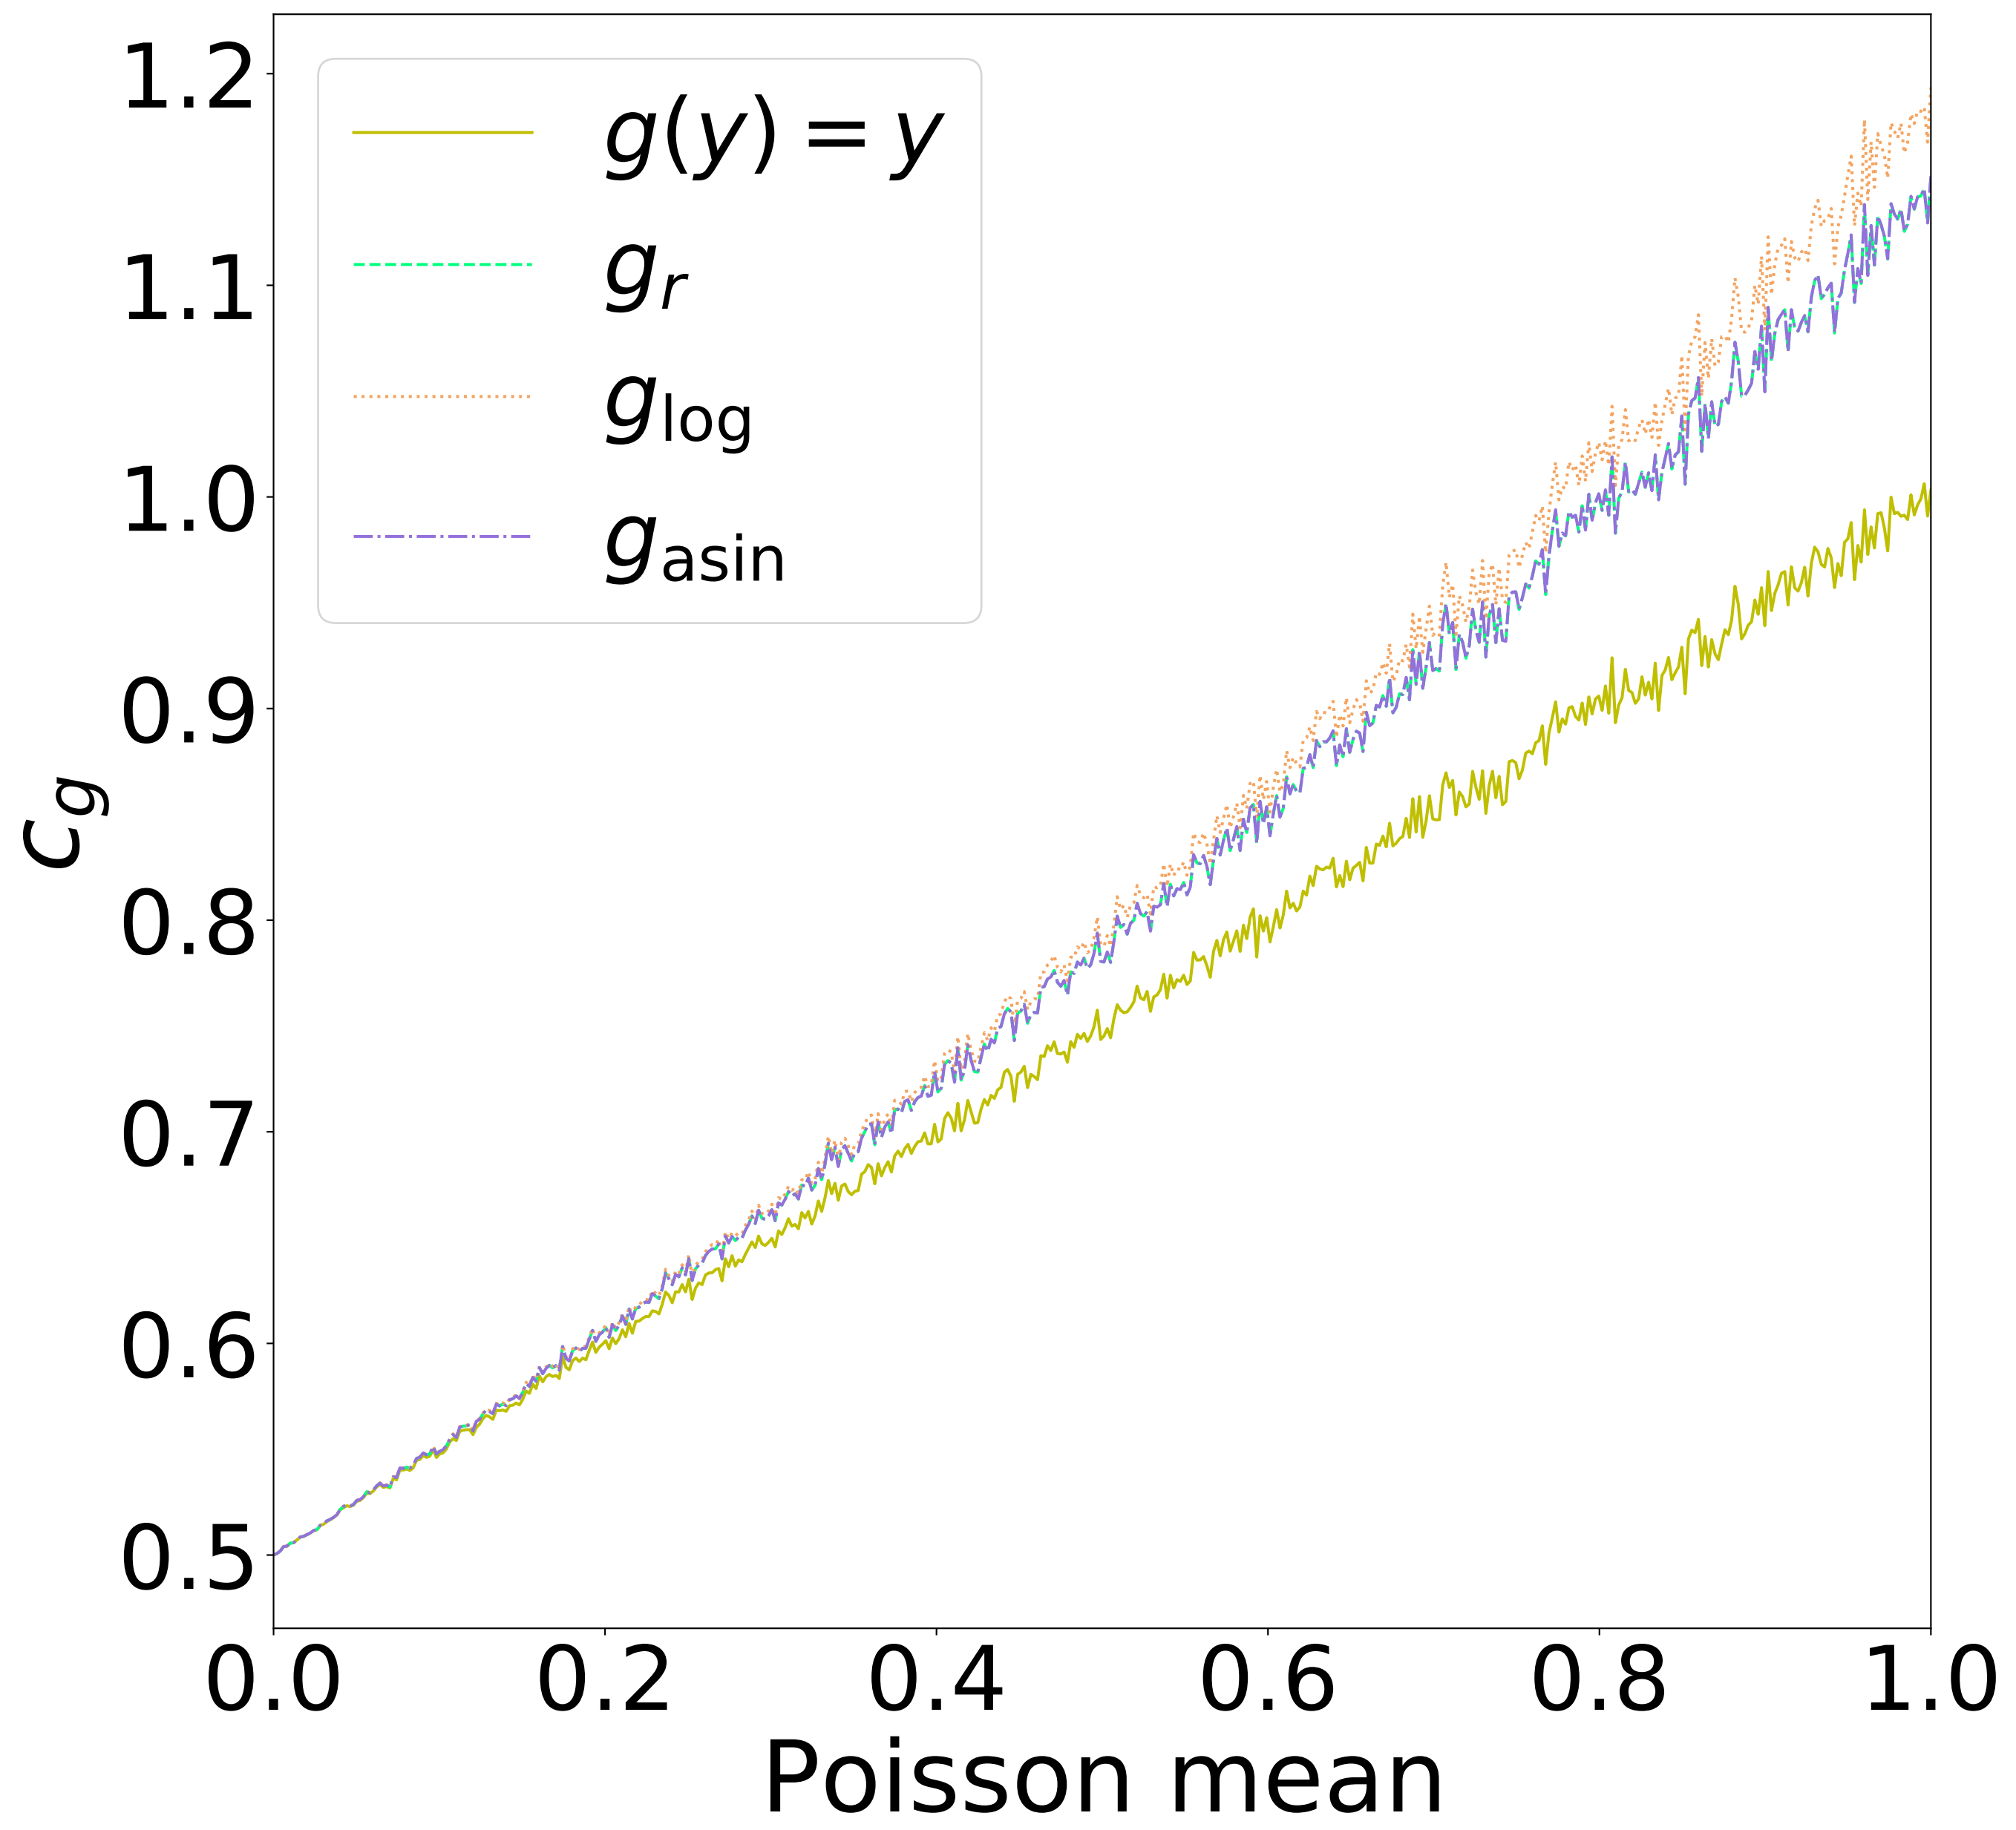

Supplement: supplementary_material [file attachment]

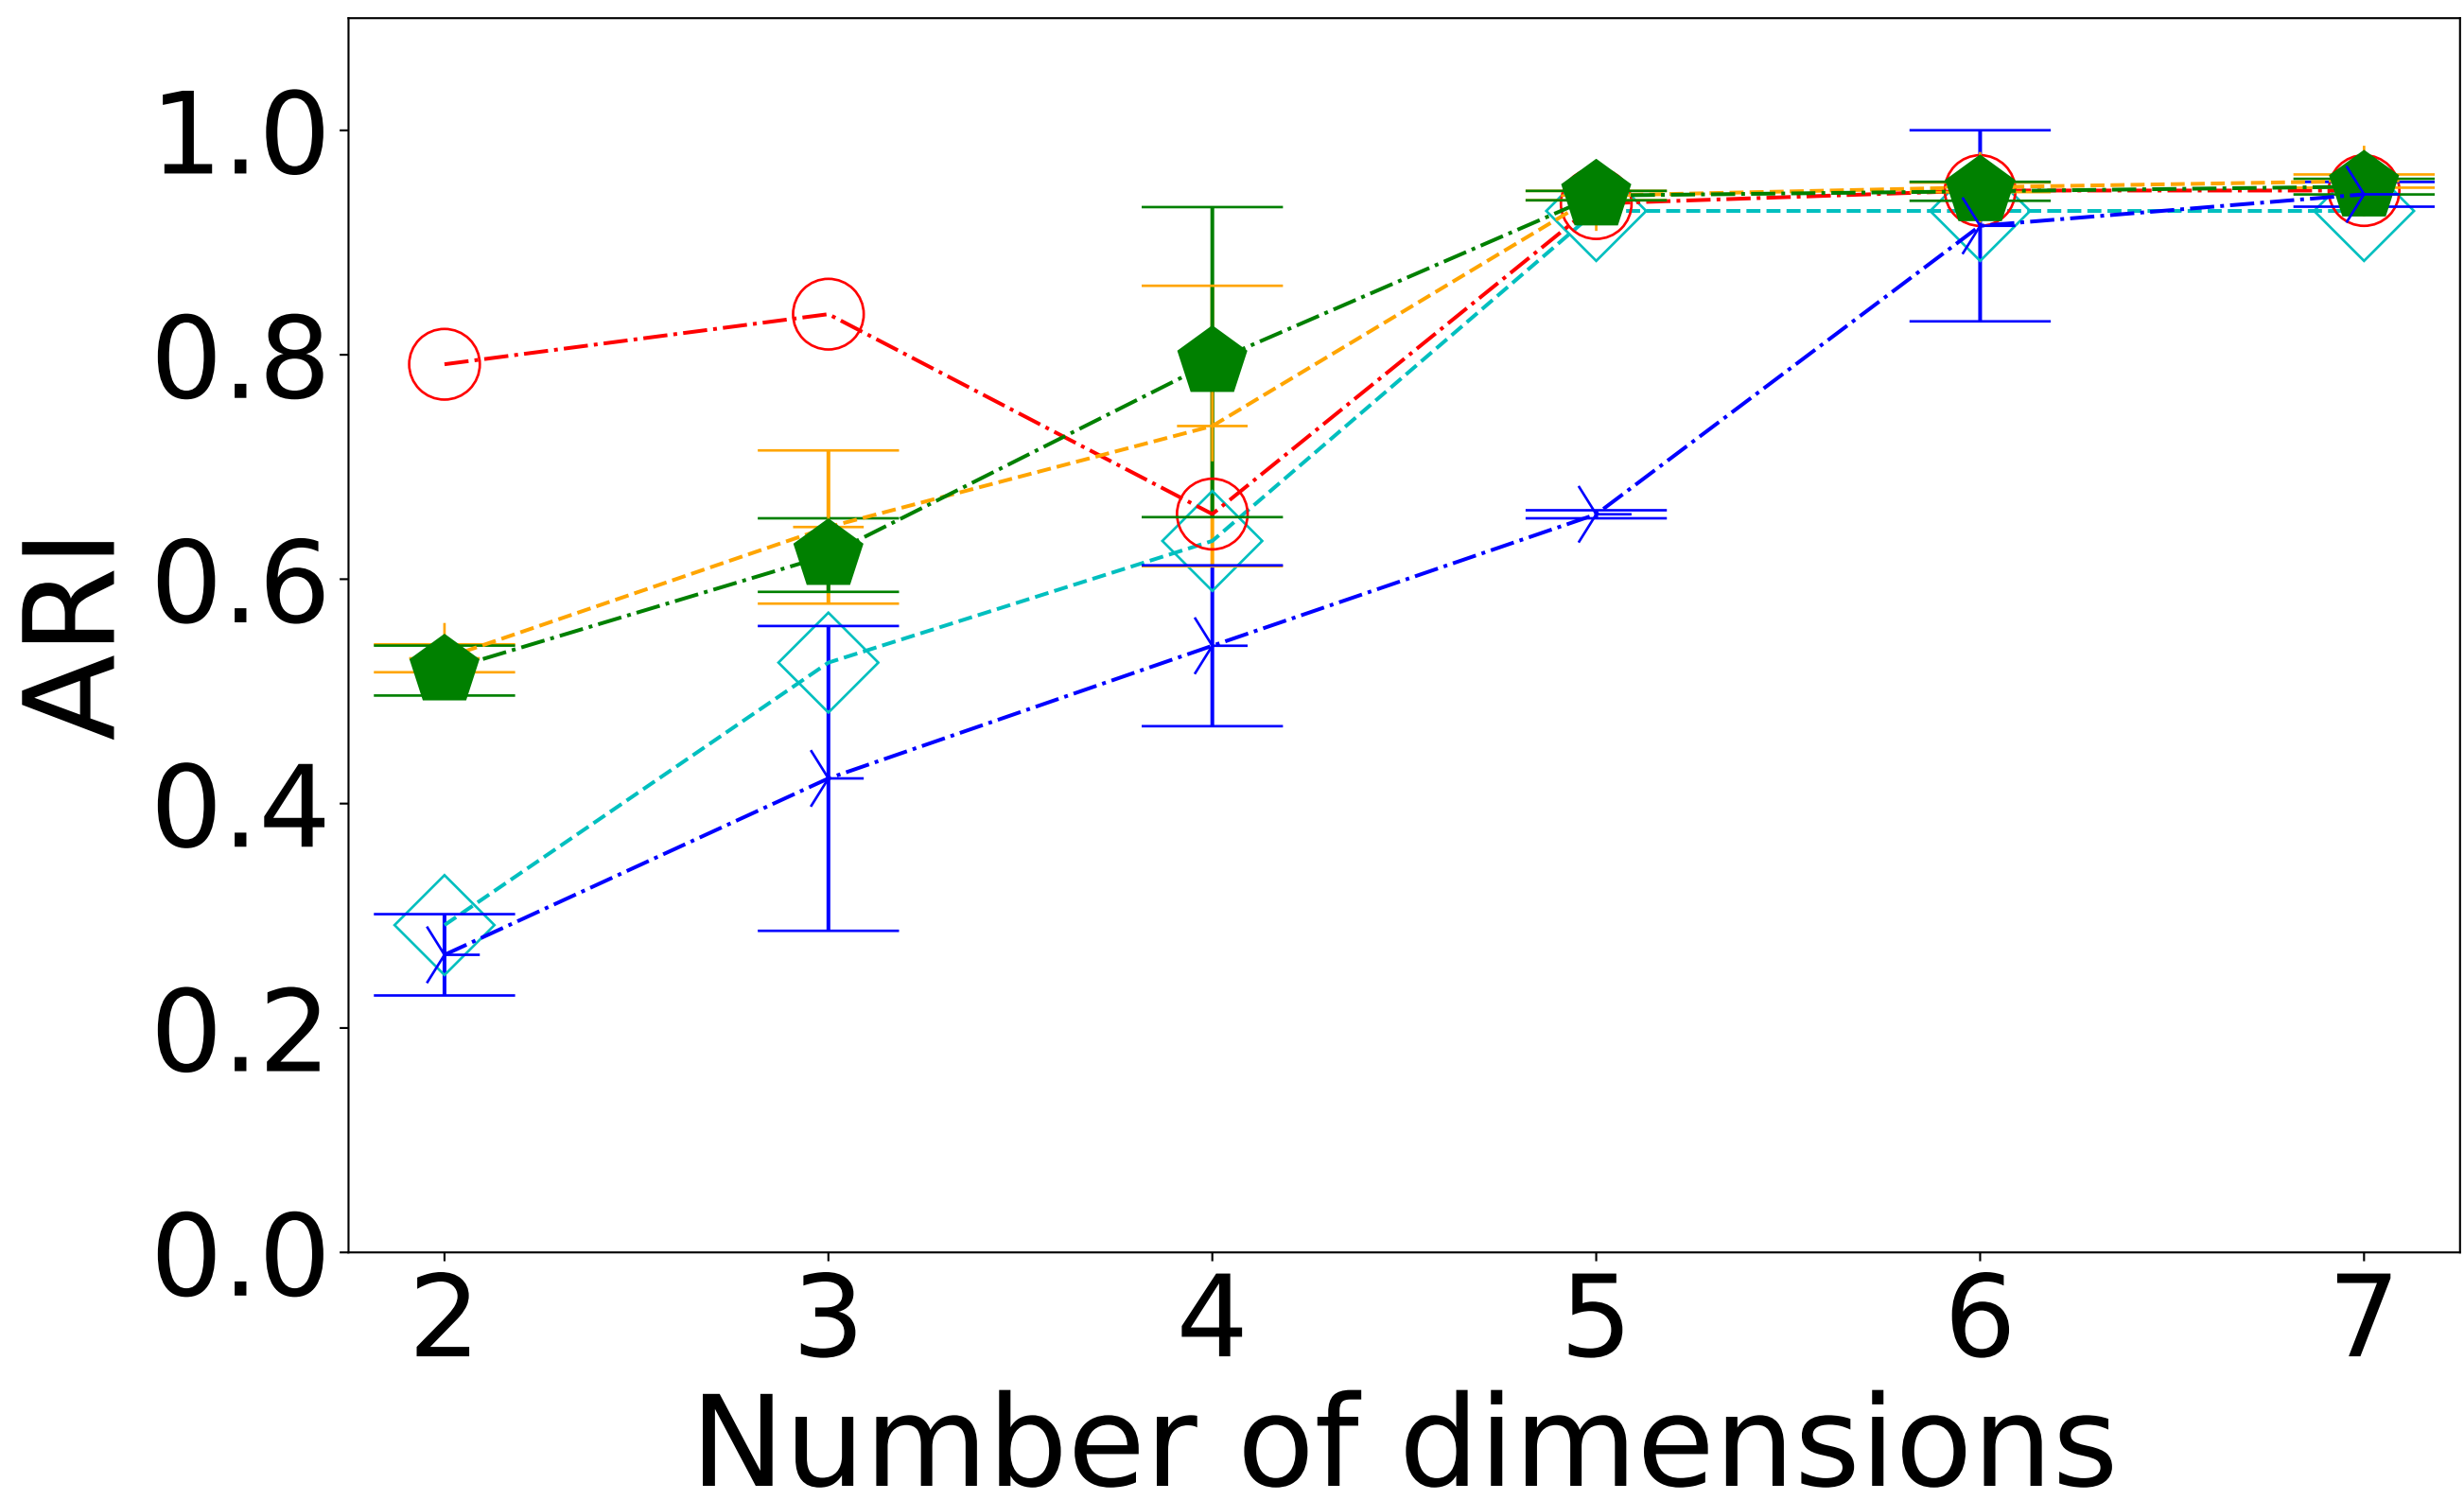

Supplement: supplementary_material [file attachment]

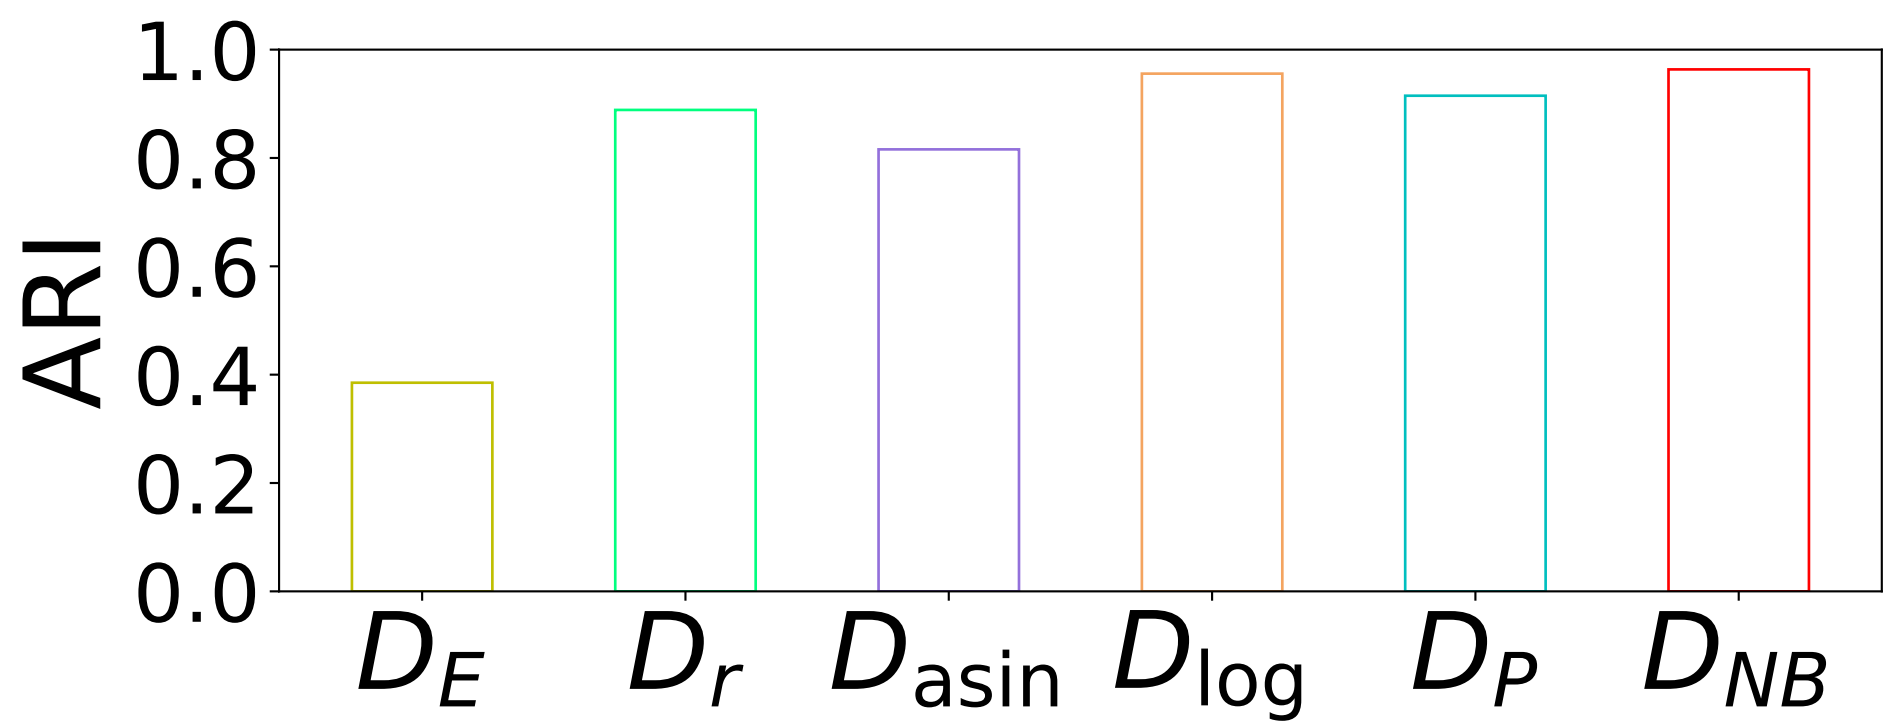

Supplement: supplementary_material [file attachment]

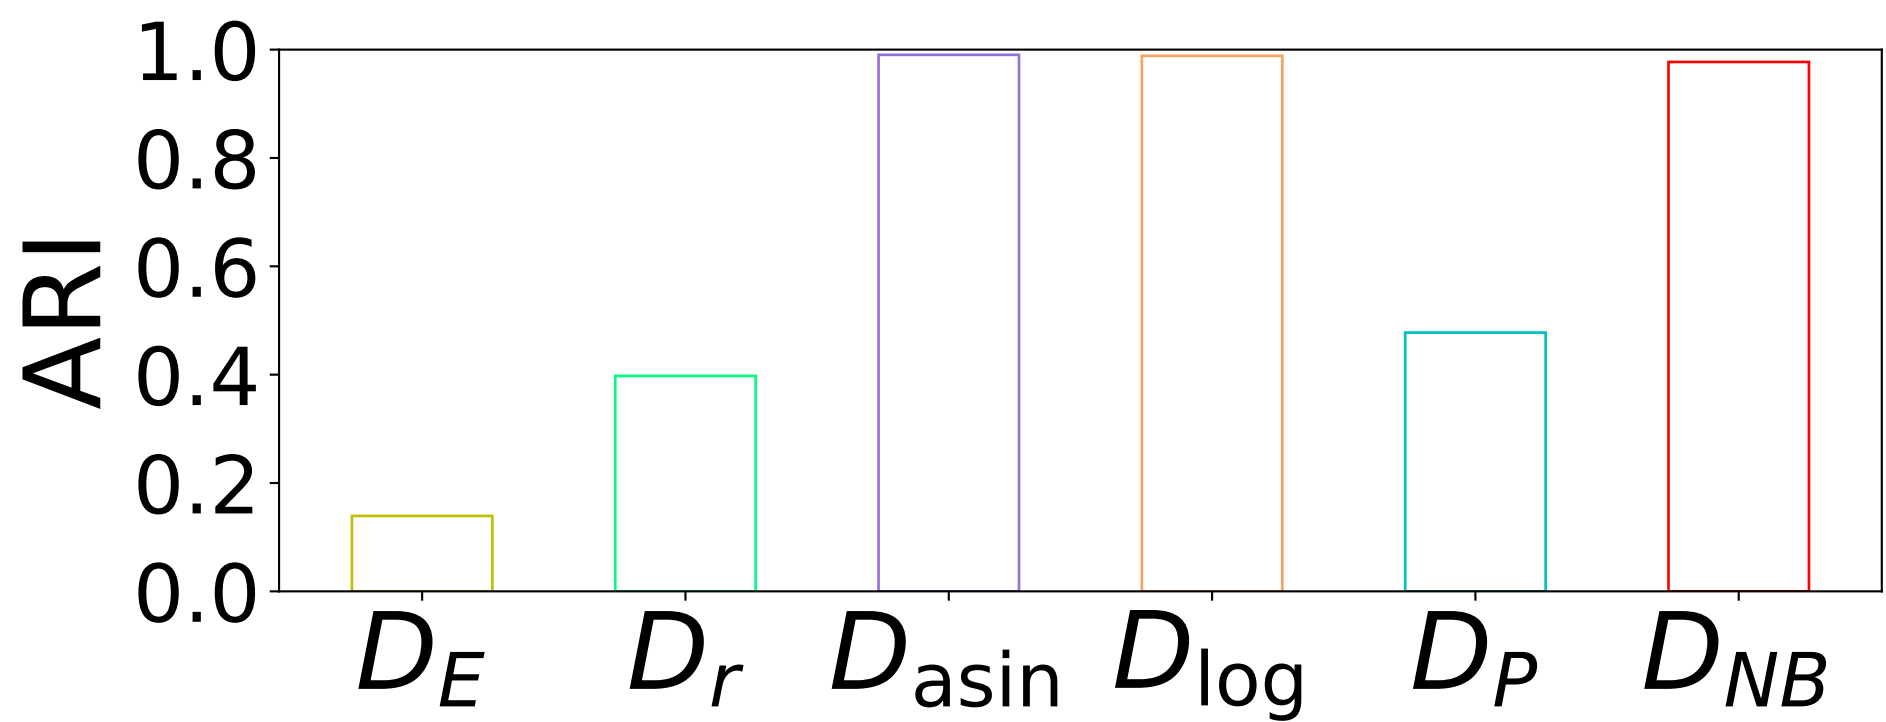

Supplement: supplementary_material [file attachment]
